# Supplementary material
Source: HighWire-hosted journal article supplement (doi:10.1101/rna.080238.124)
Supplement: Supplemental_Table_S2.xlsx [file Supplemental_Table_S2.xlsx]

## Sheet: lDG17-4_LR-3prime
<!--ParseRabbit_Task_Header: /home/drewgalls/Desktop/ExtensionPaperRevisions/lDG17/lDG17-4_AF-DG-140_enzyme_S4_mergedD_12_28_24_T_13_10_38_Parsed.xlsx-->
<!--Command_Line: /home/drewgalls/Desktop/ExtensionPaperRevisions/SupplementaryTableS2/ParseRabbit_ag00_110524_DGedits.py input=/home/drewgalls/Desktop/ExtensionPaperRevisions/lDG17/lDG17-4_AF-DG-140_enzyme_S4_merged.fastq.gz Template=CAATGCTTCTCGTGATACCCAGATCATATGAAACAGCATGACTTTTTCAAGAGTGCCATGCCCGAAGG-->
<!--PythonVersion: 3.7.12 | packaged by conda-forge | (44db2626, Nov 15 2021, 12:53:46),[PyPy 7.3.7 with GCC 9.4.0]-->
<!--ParseRabbit_Version: /home/drewgalls/Desktop/ExtensionPaperRevisions/SupplementaryTableS2/ParseRabbit_ag00_110524_DGedits.py,#,Path=/home/drewgalls/Desktop/ExtensionPaperRevisions/SupplementaryTableS2/ParseRabbit_ag00_110524_DGedits.py,Size=25043,Accessed=12_28_24_at_13_10_10,Modified=12_28_24_at_13_05_09,Created=12_28_24_at_13_05_09,FullInfo=os.stat_result(st_mode=33188, st_ino=19796425, st_…
<!--RunTime: D_12_28_24_T_13_10_38-->
<!--RunDirectory: /home/drewgalls/Desktop/ExtensionPaperRevisions/Inputs_Code-->
<!--NOTE THAT CELLS MAY NEED TO BE VERTICALLY EXPANDED TO SEE FULL VISUALIZATION-->
<!---->
<!--	Output_Key		-->
<!--	ColumnNumber	ColumnHeader	-->
<!--	0	Rank_/home/drewgalls/Desktop/ExtensionPaperRevisions/lDG17/lDG17-4_AF-DG-140_enzyme_S4_merged.fastq.gz	-->
<!--	1	Sequence_	-->
<!--	2	Count_/home/drewgalls/Desktop/ExtensionPaperRevisions/lDG17/lDG17-4_AF-DG-140_enzyme_S4_merged.fastq.gz	-->
<!--	3	PreliminarySimpleParse_/home/drewgalls/Desktop/ExtensionPaperRevisions/SupplementaryTableS2/ParseRabbit_ag00_110524_DGedits	-->
<!--	4	fray_seg_seq	-->
<!--	5	fray_seg_begin	-->
<!--	6	fray_seg_end	-->
<!--	7	fray_seg_length	-->
<!--	8	template_seg_seq	-->
<!--	9	template_seg_begin	-->
<!--	10	template_seg_end	-->
<!--	11	template_seg_length	-->
<!--	12	stem_seg_seq	-->
<!--	13	stem_seg_begin	-->
<!--	14	stem_seg_end	-->
<!--	15	stem_seg_length	-->
<!--	16	loop_seg_seq	-->
<!--	17	loop_seg_begin	-->
<!--	18	loop_seg_end	-->
<!--	19	loop_seg_length	-->
<!--	20	primer_seg_seq	-->
<!--	21	primer_seg_begin	-->
<!--	22	primer_seg_end	-->
<!--	23	primer_seg_length	-->
<!--	24	Bulge_seg_seq	-->
<!--	25	Bulge_seg_begin	-->
<!--	26	Bulge_seg_end	-->
<!--	27	Bulge_seg_length	-->
<!--	28	Complement_seg_seq	-->
<!--	29	Complement_seg_begin	-->
<!--	30	Complement_seg_end	-->
<!--	31	Complement_seg_length	-->
<!--	32	Extra_seg_seq	-->
<!--	33	Extra_seg_begin	-->
<!--	34	Extra_seg_end	-->
<!--	35	Extra_seg_length	-->
Rank_/home/drewgalls/Desktop/ExtensionPaperRevisions/lDG17/lDG17-4_AF-DG-140_enzyme_S4_merged.fastq.gz	Sequence_	Count_/home/drewgalls/Desktop/ExtensionPaperRevisions/lDG17/lDG17-4_AF-DG-140_enzyme_S4_merged.fastq.gz	PreliminarySimpleParse_/home/drewgalls/Desktop/ExtensionPaperRevisions/SupplementaryTableS2/ParseRabbit_ag00_110524_DGedits	fray_seg_seq	fray_seg_begin	fray_seg_end	fray_seg_length	template_seg_seq	template_seg_begin	template_seg_end	template_seg_length	stem_seg_seq	stem_seg_begin	stem_seg_end	stem_seg_length	loop_seg_seq	loop_seg_begin	loop_seg_end	loop_seg_length	primer_seg_seq	primer_seg_begin	primer_seg_end	primer_seg_length	Bulge_seg_seq	Bulge_seg_begin	Bulge_seg_end	Bulge_seg_length	Complement_seg_seq	Complement_seg_begin	Complement_seg_end	Complement_seg_length	Extra_seg_seq	Extra_seg_begin	Extra_seg_end	Extra_seg_length	<!--ParseRabbit_Task_Header: /home/drewgalls/Desktop/ExtensionPaperRevisions/lDG17/lDG17-4_AF-DG-140_enzyme_S4_mergedD_12_28_24_T_13_10_38_Parsed.xlsx--><!--Command_Line: /home/drewgalls/Desktop/ExtensionPaperRevisions/SupplementaryTableS2/ParseRabbit_ag00_110524_DGedits.py input=/home/drewgalls/Desktop/ExtensionPaperRevisions/lDG17/lDG17-4_AF-DG-140_enzyme_S4_merged.fastq.gz Template=CAATGCTTCTC…
1	caatgcttctcgtgatacccagatcatatgaaacagcatgactttttcaagagtgccatgcccgaagg	1408	caatgcttctcgtgatacccagatcatatgaaacagcatgactttttcaagagtgccatgcccgaag g	CAATGCTTCTCGTGATACCCAGATCATATGAAACAGCATGACTTTTTCAAGAGTGCCATGCCCGAAGG	0	68	68		68	68	0		68	68	0		68	68	0		68	68	0		68	68	0		68	68	0		68	68	0
2	caatgcttctcgtgatacccagatcatatgaaacagcatgactttttcaagagtgccatgcccgaaggG	107	caatgcttctcgtgatacccagatcatatgaaacagcatgactttttcaagagtgccatgcccgaag g G	CAATGCTTCTCGTGATACCCAGATCATATGAAACAGCATGACTTTTTCAAGAGTGCCATGCCCGAAGG	0	68	68		68	68	0		68	68	0		68	68	0		68	68	0		69	69	0		69	69	0		69	69	0
3	caatgcttctcgtgatacccagatcatatgaaacagcatgactttttcaagagtgccatgcccgaaggCACTCTTGAAAAA	65	caatgcttctcgtgatacccagatcatatgaaacagcatgac atgc tttttcaagagtgcc c AAAAAGTTCTCACggaagc	CAATGCTTCTCGTGATACCCAGATCATATGAAACAGCATGAC	0	42	42	TTTTTCAAGAGTG	42	55	13	CC	55	57	2	ATGCCCGAA	57	66	9	GG	66	68	2		68	68	0	CACTCTTGAAAAA	68	81	13		81	81	0
4	caatgcttctcgtgatacccagatcatatgaaacagcatgactttttcaagagtgccatgcccgaaggTCATGCTGTTTCAT	48	caatgcttctcgtgatacccagatcat tttttcaagagt atgaaacagcatgac g TACTTTGTCGTACTggaagcccgtacc	CAATGCTTCTCGTGATACCCAGATCAT	0	27	27	ATGAAACAGCATGA	27	41	14	C	41	42	1	TTTTTCAAGAGTGCCATGCCCGAAG	42	67	25	G	67	68	1		68	68	0	TCATGCTGTTTCAT	68	82	14		82	82	0
5	caatgcttctcgtgatacccagatcatatgaaacagcatgactttttcaagagtgccatgcccgaaggGGCATGGCACTCT	35	caatgcttctcgtgatacccagatcatatgaaacagcatgactttttca g agagtgccatgccc a TCTCACGGTACGGg a g	CAATGCTTCTCGTGATACCCAGATCATATGAAACAGCATGACTTTTTCA	0	49	49	AGAGTGCCATGCC	49	62	13	C	62	63	1	GAAG	63	67	4	G	67	68	1		68	68	0	GGCATGGCACTCT	68	81	13		81	81	0
6	caatgcttctcgtgatacccagatcatatgaaacagcatgactttttcaagagtgccatgcccgaaggGGCATGGCACTCTT	35	caatgcttctcgtgatacccagatcatatgaaacagcatgactttttc g aagagtgccatgccc a TTCTCACGGTACGGg a g	CAATGCTTCTCGTGATACCCAGATCATATGAAACAGCATGACTTTTTC	0	48	48	AAGAGTGCCATGCC	48	62	14	C	62	63	1	GAAG	63	67	4	G	67	68	1		68	68	0	GGCATGGCACTCTT	68	82	14		82	82	0
7	caatgcttctcgtgatacccagatcatatgaaacagcatgactttttcaagagtgccatgcccgaaggCACTCTTGAAAAAGTCAT	33	caatgcttctcgtgatacccagatcatatgaaacagc atgc atgactttttcaagagtgcc c TACTGAAAAAGTTCTCACggaagc	CAATGCTTCTCGTGATACCCAGATCATATGAAACAGC	0	37	37	ATGACTTTTTCAAGAGTG	37	55	18	CC	55	57	2	ATGCCCGAA	57	66	9	GG	66	68	2		68	68	0	CACTCTTGAAAAAGTCAT	68	86	18		86	86	0
8	caatgcttctcgtgatacccagatcatatgaaacagcatgactttttcaagagtgccatgcccgaaggGCATGGCACTCA	30	caatgcttctcgtgatacccagatcatatgaaacagcatgactttttcaa g gagtgccatgccc a CTCACGGTACGgga A	CAATGCTTCTCGTGATACCCAGATCATATGAAACAGCATGACTTTTTCAA	0	50	50	GAGTGCCATGC	50	61	11	CC	61	63	2	GAA	63	66	3	GG	66	68	2		68	68	0	GCATGGCACTC	68	79	11	A	79	80	1
9	caatgcttctcgtgatacccagatcatatgaaacagcatgactttttcaagagtgccatgcccgaaggC	30	caatgcttctcgtgatacccagatcatatgaaacagcatgactttttcaagagtgccatgcccgaag g C	CAATGCTTCTCGTGATACCCAGATCATATGAAACAGCATGACTTTTTCAAGAGTGCCATGCCCGAAGG	0	68	68		68	68	0		68	68	0		68	68	0		68	68	0		69	69	0		69	69	0		69	69	0
10	caatgcttctcgtgatacccagatcatatgaaacagcatgactttttcaagagtgccatgcccgaaggCACTCTTGAAAAAGTCATGCT	30	caatgcttctcgtgatacccagatcatatgaaac atgc agcatgactttttcaagagtgcc c TCGTACTGAAAAAGTTCTCACggaagc	CAATGCTTCTCGTGATACCCAGATCATATGAAAC	0	34	34	AGCATGACTTTTTCAAGAGTG	34	55	21	CC	55	57	2	ATGCCCGAA	57	66	9	GG	66	68	2		68	68	0	CACTCTTGAAAAAGTCATGCT	68	89	21		89	89	0
11	caatgcttctcgtgatacccagatcatatgaaacagcatgactttttcaagagtgccatgcccgaaggTCATGCTGTTTCATAT	28	caatgcttctcgtgatacccagatc tttttcaagagt atatgaaacagcatgac g TATACTTTGTCGTACTggaagcccgtacc	CAATGCTTCTCGTGATACCCAGATC	0	25	25	ATATGAAACAGCATGA	25	41	16	C	41	42	1	TTTTTCAAGAGTGCCATGCCCGAAG	42	67	25	G	67	68	1		68	68	0	TCATGCTGTTTCATAT	68	84	16		84	84	0
12	caatgcttctcgtgatacccagatcatatgaaacagcatgactttttcaagagtgccatgcccgaaggGCATGGCACTCTT	26	caatgcttctcgtgatacccagatcatatgaaacagcatgactttttc g aagagtgccatgccc a TTCTCACGGTACGgga	CAATGCTTCTCGTGATACCCAGATCATATGAAACAGCATGACTTTTTC	0	48	48	AAGAGTGCCATGC	48	61	13	CC	61	63	2	GAA	63	66	3	GG	66	68	2		68	68	0	GCATGGCACTCTT	68	81	13		81	81	0
13	caatgcttctcgtgatacccagatcatatgaaacagcatgactttttcaagagtgccatgcccgaaggCACTCTTGAAAAAGTC	24	caatgcttctcgtgatacccagatcatatgaaacagcat atgc gactttttcaagagtgcc c CTGAAAAAGTTCTCACggaagc	CAATGCTTCTCGTGATACCCAGATCATATGAAACAGCAT	0	39	39	GACTTTTTCAAGAGTG	39	55	16	CC	55	57	2	ATGCCCGAA	57	66	9	GG	66	68	2		68	68	0	CACTCTTGAAAAAGTC	68	84	16		84	84	0
14	caatgcttctcgtgatacccagatcatatgaaacagcatgactttttcaagagtgccatgcccgaaggGTATCACGAGAAGCATTGA	24	agatcatatgaaacagcatgac caatgcttctcgtgataccc t GTTACGAAGAGCACTATGgg t A aagcccgtaccgtgagaacttt		0	0	0	CAATGCTTCTCGTGATAC	0	18	18	CC	18	20	2	AGATCATATGAAACAGCATGACTTTTTCAAGAGTGCCATGCCCGAA	20	66	46	GG	66	68	2		68	68	0	GTATCACGAGAAGCATTG	68	86	18	A	86	87	1
15	caatgcttctcgtgatacccagatcatatgaaacagcatgactttttcaagagtgccatgcccgaaggGCATGGCACTCTTGAAAAA	21	caatgcttctcgtgatacccagatcatatgaaacagcatgac g tttttcaagagtgccatgccc a AAAAAGTTCTCACGGTACGgga	CAATGCTTCTCGTGATACCCAGATCATATGAAACAGCATGAC	0	42	42	TTTTTCAAGAGTGCCATGC	42	61	19	CC	61	63	2	GAA	63	66	3	GG	66	68	2		68	68	0	GCATGGCACTCTTGAAAAA	68	87	19		87	87	0
16	caatgcttctcgtgatacccagatcatatgaaacagcatgactttttcaagagtgccatgcccgaaggTCATGCTGTTTCATATGATCT	20	caatgcttctcgtgataccc tttttcaagagt agatcatatgaaacagcatgac g TCTAGTATACTTTGTCGTACTggaagcccgtacc	CAATGCTTCTCGTGATACCC	0	20	20	AGATCATATGAAACAGCATGA	20	41	21	C	41	42	1	TTTTTCAAGAGTGCCATGCCCGAAG	42	67	25	G	67	68	1		68	68	0	TCATGCTGTTTCATATGATCT	68	89	21		89	89	0
17	caatgcttctcgtgatacccagatcatatgaaacagcatgactttttcaagagtgccatgcccgaaggCACTCTTGAAAAAGTCATGCTGT	20	caatgcttctcgtgatacccagatcatatgaa atgc acagcatgactttttcaagagtgcc c TGTCGTACTGAAAAAGTTCTCACggaagc	CAATGCTTCTCGTGATACCCAGATCATATGAA	0	32	32	ACAGCATGACTTTTTCAAGAGTG	32	55	23	CC	55	57	2	ATGCCCGAA	57	66	9	GG	66	68	2		68	68	0	CACTCTTGAAAAAGTCATGCTGT	68	91	23		91	91	0
18	caatgcttctcgtgatacccagatcatatgaaacagcatgactttttcaagagtgccatgcccgaaggA	20	caatgcttctcgtgatacccagatcatatgaaacagcatgactttttcaagagtgccatgcccgaag g A	CAATGCTTCTCGTGATACCCAGATCATATGAAACAGCATGACTTTTTCAAGAGTGCCATGCCCGAAGG	0	68	68		68	68	0		68	68	0		68	68	0		68	68	0		69	69	0		69	69	0		69	69	0
19	caatgcttctcgtgatacccagatcatatgaaacagcatgactttttcaagagtgccatgcccgaaggCC	19	caatgcttctcgtgatacccagatcatatgaaacagcatgactttttcaagagtgccatgcccgaag g C C	CAATGCTTCTCGTGATACCCAGATCATATGAAACAGCATGACTTTTTCAAGAGTGCCATGCCCGAAGG	0	68	68		68	68	0		68	68	0		68	68	0		68	68	0		70	70	0		70	70	0		70	70	0
20	caatgcttctcgtgatacccagatcatatgaaacagcatgactttttcaagagtgccatgcccgaaggGCATGGCACTCT	17	caatgcttctcgtgatacccagatcatatgaaacagcatgactttttca g agagtgccatgccc a TCTCACGGTACGgga	CAATGCTTCTCGTGATACCCAGATCATATGAAACAGCATGACTTTTTCA	0	49	49	AGAGTGCCATGC	49	61	12	CC	61	63	2	GAA	63	66	3	GG	66	68	2		68	68	0	GCATGGCACTCT	68	80	12		80	80	0
21	caatgcttctcgtgatacccagatcatatgaaacagcatgactttttcaagagtgccatgcccgaaggGTATCACGAGAAGCATTGG	16	agatcatatgaaacagcatgac caatgcttctcgtgataccc t GTTACGAAGAGCACTATGgg t G aagcccgtaccgtgagaacttt		0	0	0	CAATGCTTCTCGTGATAC	0	18	18	CC	18	20	2	AGATCATATGAAACAGCATGACTTTTTCAAGAGTGCCATGCCCGAA	20	66	46	GG	66	68	2		68	68	0	GTATCACGAGAAGCATTG	68	86	18	G	86	87	1
22	caatgcttctcgtgatacccagatcatatgaaacagcatgactttttcaagagtgccatgcccgaaggCCATGCTGTTTCATAT	15	caatgcttctcgtgatacccagatc actttttcaagagt atatgaaacagcatg g TATACTTTGTCGTACCggaagcccgtacc	CAATGCTTCTCGTGATACCCAGATC	0	25	25	ATATGAAACAGCATG	25	40	15		40	40	0	ACTTTTTCAAGAGTGCCATGCCCGAAGG	40	68	28		68	68	0	C	68	69	1	CATGCTGTTTCATAT	69	84	15		84	84	0
23	caatgcttctcgtgatacccagatcatatgaaacagcatgactttttcaagagtgccatgcccgaaggGT	15	caatgcttctcgtgat agatcatatgaaacagcatgac accc t TGgg t aagcccgtaccgtgagaacttt	CAATGCTTCTCGTGAT	0	16	16	AC	16	18	2	CC	18	20	2	AGATCATATGAAACAGCATGACTTTTTCAAGAGTGCCATGCCCGAA	20	66	46	GG	66	68	2		68	68	0	GT	68	70	2		70	70	0
24	caatgcttctcgtgatacccagatcatatgaaacagcatgactttttcaagagtgccatgcccgaaggGTATCACGAGAAGC	15	caat agatcatatgaaacagcatgac gcttctcgtgataccc t CGAAGAGCACTATGgg t aagcccgtaccgtgagaacttt	CAAT	0	4	4	GCTTCTCGTGATAC	4	18	14	CC	18	20	2	AGATCATATGAAACAGCATGACTTTTTCAAGAGTGCCATGCCCGAA	20	66	46	GG	66	68	2		68	68	0	GTATCACGAGAAGC	68	82	14		82	82	0
25	caatgcttctcgtgatacccagatcatatgaaacagcatgactttttcaagagtgccatgcccgaaggTCATGCTGT	14	caatgcttctcgtgatacccagatcatatgaa tttttcaagagt acagcatgac g TGTCGTACTggaagcccgtacc	CAATGCTTCTCGTGATACCCAGATCATATGAA	0	32	32	ACAGCATGA	32	41	9	C	41	42	1	TTTTTCAAGAGTGCCATGCCCGAAG	42	67	25	G	67	68	1		68	68	0	TCATGCTGT	68	77	9		77	77	0
26	caatgcttctcgtgatacccagatcatatgaaacagcatgactttttcaagagtgccatgcccgaaggGCATGGCACTCC	13	caatgcttctcgtgatacccagatcatatgaaacagcatgactttttcaa g gagtgccatgccc a CTCACGGTACGgga C	CAATGCTTCTCGTGATACCCAGATCATATGAAACAGCATGACTTTTTCAA	0	50	50	GAGTGCCATGC	50	61	11	CC	61	63	2	GAA	63	66	3	GG	66	68	2		68	68	0	GCATGGCACTC	68	79	11	C	79	80	1
27	caatgcttctcgtgatacccagatcatatgaaacagcatgactttttcaagagtgccatgcccgaaggGA	13	caatgcttctcgtgatacccagatcatatgaaacagcatgactttttcaagagtgccatgcccgaag g G A	CAATGCTTCTCGTGATACCCAGATCATATGAAACAGCATGACTTTTTCAAGAGTGCCATGCCCGAAGG	0	68	68		68	68	0		68	68	0		68	68	0		68	68	0		70	70	0		70	70	0		70	70	0
28	caatgcttctcgtgatacccagatcatatgaaacagcatgactttttcaagagtgccatgcccgaaggCA	12	caatgcttctcgtgatacccagatcatatgaaacagcatgactttttcaagagtgcca c tgcc g ACgg a a	CAATGCTTCTCGTGATACCCAGATCATATGAAACAGCATGACTTTTTCAAGAGTGCCA	0	58	58	TG	58	60	2	CC	60	62	2	CGAA	62	66	4	GG	66	68	2		68	68	0	CA	68	70	2		70	70	0
29	caatgcttctcgtgatacccagatcatatgaaacagcatgactttttcaagagtgccatgcccgaaggCATGGCACTCTTGAAAAA	11	caatgcttctcgtgatacccagatcatatgaaacagcatgac c tttttcaagagtgccatgcc g AAAAAGTTCTCACGGTACgg a a	CAATGCTTCTCGTGATACCCAGATCATATGAAACAGCATGAC	0	42	42	TTTTTCAAGAGTGCCATG	42	60	18	CC	60	62	2	CGAA	62	66	4	GG	66	68	2		68	68	0	CATGGCACTCTTGAAAAA	68	86	18		86	86	0
30	caatgcttctcgtgatacccagatcatatgaaacagcatgactttttcaagagtgccatgcccgaaggGCATGGCACTCTTGAAAAAGTC	11	caatgcttctcgtgatacccagatcatatgaaacagcat g gactttttcaagagtgccatgccc a CTGAAAAAGTTCTCACGGTACGgga	CAATGCTTCTCGTGATACCCAGATCATATGAAACAGCAT	0	39	39	GACTTTTTCAAGAGTGCCATGC	39	61	22	CC	61	63	2	GAA	63	66	3	GG	66	68	2		68	68	0	GCATGGCACTCTTGAAAAAGTC	68	90	22		90	90	0
31	caatgcttctcgtgatacccagatcatatgaaacagcatgactttttcaagagtgccatgcccgaaggGGCATGGCACTCA	11	caatgcttctcgtgatacccagatcatatgaaacagcatgactttttcaa g gagtgccatgccc a CTCACGGTACGGg a A g	CAATGCTTCTCGTGATACCCAGATCATATGAAACAGCATGACTTTTTCAA	0	50	50	GAGTGCCATGCC	50	62	12	C	62	63	1	GAAG	63	67	4	G	67	68	1		68	68	0	GGCATGGCACTC	68	80	12	A	80	81	1
32	caatgcttctcgtgatacccagatcatatgaaacagcatgactttttcaagagtgccatgcccgaaggCCATGCTGTTTCATATGAT	10	caatgcttctcgtgatacccag actttttcaagagt atcatatgaaacagcatg g TAGTATACTTTGTCGTACCggaagcccgtacc	CAATGCTTCTCGTGATACCCAG	0	22	22	ATCATATGAAACAGCATG	22	40	18		40	40	0	ACTTTTTCAAGAGTGCCATGCCCGAAGG	40	68	28		68	68	0	C	68	69	1	CATGCTGTTTCATATGAT	69	87	18		87	87	0
33	caatgcttctcgtgatacccagatcatatgaaacagcatgactttttcaagagtgccatgcccgaaggGTATCACGAGAAGCAT	10	ca agatcatatgaaacagcatgac atgcttctcgtgataccc t TACGAAGAGCACTATGgg t aagcccgtaccgtgagaacttt	CA	0	2	2	ATGCTTCTCGTGATAC	2	18	16	CC	18	20	2	AGATCATATGAAACAGCATGACTTTTTCAAGAGTGCCATGCCCGAA	20	66	46	GG	66	68	2		68	68	0	GTATCACGAGAAGCAT	68	84	16		84	84	0
34	caatgcttctcgtgatacccagatcatatgaaacagcatgactttttcaagagtgccatgcccgaaggGGCATGGCACTC	10	caatgcttctcgtgatacccagatcatatgaaacagcatgactttttcaa g gagtgccatgccc a CTCACGGTACGGg a g	CAATGCTTCTCGTGATACCCAGATCATATGAAACAGCATGACTTTTTCAA	0	50	50	GAGTGCCATGCC	50	62	12	C	62	63	1	GAAG	63	67	4	G	67	68	1		68	68	0	GGCATGGCACTC	68	80	12		80	80	0
35	caatgcttctcgtgatacccagatcatatgaaacagcatgactttttcaagagtgccatgcccgaaggCCATGCTGTTTCAT	10	caatgcttctcgtgatacccagatcat actttttcaagagt atgaaacagcatg g TACTTTGTCGTACCggaagcccgtacc	CAATGCTTCTCGTGATACCCAGATCAT	0	27	27	ATGAAACAGCATG	27	40	13		40	40	0	ACTTTTTCAAGAGTGCCATGCCCGAAGG	40	68	28		68	68	0	C	68	69	1	CATGCTGTTTCAT	69	82	13		82	82	0
36	caatgcttctcgtgatacccagatcatatgaaacagcatgactttttcaagagtgccatgcccgaaggGCATGGCACTC	9	caatgcttctcgtgatacccagatcatatgaaacagcatgactttttcaa g gagtgccatgccc a CTCACGGTACGgga	CAATGCTTCTCGTGATACCCAGATCATATGAAACAGCATGACTTTTTCAA	0	50	50	GAGTGCCATGC	50	61	11	CC	61	63	2	GAA	63	66	3	GG	66	68	2		68	68	0	GCATGGCACTC	68	79	11		79	79	0
37	caatgcttctcgtgatacccagatcatatgaaacagcatgactttttcaagagtgccatgcccgaaggGCATGGCACAC	9	caatgcttctcgtgatacccagatcatatgaaacagcatgactttttcaaga g gtgccatgccc a CACGGTACGgga CA	CAATGCTTCTCGTGATACCCAGATCATATGAAACAGCATGACTTTTTCAAGA	0	52	52	GTGCCATGC	52	61	9	CC	61	63	2	GAA	63	66	3	GG	66	68	2		68	68	0	GCATGGCAC	68	77	9	AC	77	79	2
38	caatgcttctcgtgatacccagatcatatgaaacagcatgactttttcaagagtgccatgcccgaaggGTATCACGAGAA	9	caatgc agatcatatgaaacagcatgac ttctcgtgataccc t AAGAGCACTATGgg t aagcccgtaccgtgagaacttt	CAATGC	0	6	6	TTCTCGTGATAC	6	18	12	CC	18	20	2	AGATCATATGAAACAGCATGACTTTTTCAAGAGTGCCATGCCCGAA	20	66	46	GG	66	68	2		68	68	0	GTATCACGAGAA	68	80	12		80	80	0
39	caatgcttctcgtgatacccagatcatatgaaacagcatgactttttcaagagtgccatgcccgaaggCACTCTTGAAAAAGT	8	caatgcttctcgtgatacccagatcatatgaaacagcatg atgc actttttcaagagtgcc c TGAAAAAGTTCTCACggaagc	CAATGCTTCTCGTGATACCCAGATCATATGAAACAGCATG	0	40	40	ACTTTTTCAAGAGTG	40	55	15	CC	55	57	2	ATGCCCGAA	57	66	9	GG	66	68	2		68	68	0	CACTCTTGAAAAAGT	68	83	15		83	83	0
40	caatgcttctcgtgatacccagatcatatgaaacagcatgactttttcaagagtgccatgcccgaaggCACTCTTGAAAAGTCATGCT	8	caatgcttctcgtgatacccagatcatatgaaacagcatgact atgc ttttcaagagtgcc c AAAAGTTCTCACggaagc TCGTACTG	CAATGCTTCTCGTGATACCCAGATCATATGAAACAGCATGACT	0	43	43	TTTTCAAGAGTG	43	55	12	CC	55	57	2	ATGCCCGAA	57	66	9	GG	66	68	2		68	68	0	CACTCTTGAAAA	68	80	12	GTCATGCT	80	88	8
41	caatgcttctcgtgatacccagatcatatgaaacagcatgactttttcaagagtgccatgcccgaaggCACTCTTGAAAAAG	8	caatgcttctcgtgatacccagatcatatgaaacagcatga atgc ctttttcaagagtgcc c GAAAAAGTTCTCACggaagc	CAATGCTTCTCGTGATACCCAGATCATATGAAACAGCATGA	0	41	41	CTTTTTCAAGAGTG	41	55	14	CC	55	57	2	ATGCCCGAA	57	66	9	GG	66	68	2		68	68	0	CACTCTTGAAAAAG	68	82	14		82	82	0
42	caatgcttctcgtgatacccagatcatatgaaacagcatgactttttcaagagtgccatgcccgaaggGGCATGGCACTCTTGAAAAA	7	caatgcttctcgtgatacccagatcatatgaaacagcatgac g tttttcaagagtgccatgccc a AAAAAGTTCTCACGGTACGGg a g	CAATGCTTCTCGTGATACCCAGATCATATGAAACAGCATGAC	0	42	42	TTTTTCAAGAGTGCCATGCC	42	62	20	C	62	63	1	GAAG	63	67	4	G	67	68	1		68	68	0	GGCATGGCACTCTTGAAAAA	68	88	20		88	88	0
43	caatgcttctcgtgatacccagatcatatgaaacagcatgactttttcaagagtgccatgcccgaaggCCTGGCACTCTTGAAAAA	7	caatgcttctcgtgatacccagatcatatgaaacagcatgac tgccc tttttcaagagtgcca g AAAAAGTTCTCACGGT a CCgga	CAATGCTTCTCGTGATACCCAGATCATATGAAACAGCATGAC	0	42	42	TTTTTCAAGAGTGCCA	42	58	16		58	58	0	TGCCCGAAGG	58	68	10		68	68	0	CC	68	70	2	TGGCACTCTTGAAAAA	70	86	16		86	86	0
44	caatgcttctcgtgatacccagatcatatgaaacagcatgactttttcaagagtgccatgcccgaaggT	7	caatgcttctcgtgatacccagatcatatgaaacagcatgactttttcaagagtgccatgcccgaag g T	CAATGCTTCTCGTGATACCCAGATCATATGAAACAGCATGACTTTTTCAAGAGTGCCATGCCCGAAGG	0	68	68		68	68	0		68	68	0		68	68	0		68	68	0		69	69	0		69	69	0		69	69	0
45	caatgcttctcgtgatacccagatcatatgaaacagcatgactttttcaagagtgccatgcccgaaggGCATGGCACTCG	7	caatgcttctcgtgatacccagatcatatgaaacagcatgactttttcaa g gagtgccatgccc a CTCACGGTACGgga G	CAATGCTTCTCGTGATACCCAGATCATATGAAACAGCATGACTTTTTCAA	0	50	50	GAGTGCCATGC	50	61	11	CC	61	63	2	GAA	63	66	3	GG	66	68	2		68	68	0	GCATGGCACTC	68	79	11	G	79	80	1
46	caatgcttctcgtgatacccagatcatatgaaacagcatgactttttcaagagtgccatgcccgaaggGTCATGCTGTTTCAT	7	caatgcttctcgtgatacccagatcat tttttcaagagt atgaaacagcatgac g TACTTTGTCGTACTG c ggaagcccgtac	CAATGCTTCTCGTGATACCCAGATCAT	0	27	27	ATGAAACAGCATGAC	27	42	15		42	42	0	TTTTTCAAGAGTGCCATGCCCGAAGG	42	68	26		68	68	0		68	68	0	GTCATGCTGTTTCAT	68	83	15		83	83	0
47	caatgcttctcgtgatacccagatcatatgaaacagcatgactttttcaagagtgccatgcccgaaggGGCATGGCACA	7	caatgcttctcgtgatacccagatcatatgaaacagcatgactttttcaaga g gtgccatgccc a CACGGTACGGg a A g	CAATGCTTCTCGTGATACCCAGATCATATGAAACAGCATGACTTTTTCAAGA	0	52	52	GTGCCATGCC	52	62	10	C	62	63	1	GAAG	63	67	4	G	67	68	1		68	68	0	GGCATGGCAC	68	78	10	A	78	79	1
48	caatgcttctcgtgatacccagatcatatgaaacagcatgactttttcaagagtgccatgcccgaaggCCATGCTGTTTCATATGATCT	7	caatgcttctcgtgataccc actttttcaagagt agatcatatgaaacagcatg g TCTAGTATACTTTGTCGTACCggaagcccgtacc	CAATGCTTCTCGTGATACCC	0	20	20	AGATCATATGAAACAGCATG	20	40	20		40	40	0	ACTTTTTCAAGAGTGCCATGCCCGAAGG	40	68	28		68	68	0	C	68	69	1	CATGCTGTTTCATATGATCT	69	89	20		89	89	0
49	caatgcttctcgtgatacccagatcatatgaaacagcatgactttttcaagagtgccatgcccgaaggGCATGGCACTCAT	6	caatgcttctcgtgatacccagatcatatgaaacagcatgactttttcaa g gagtgccatgccc a CTCACGGTACGgga TA	CAATGCTTCTCGTGATACCCAGATCATATGAAACAGCATGACTTTTTCAA	0	50	50	GAGTGCCATGC	50	61	11	CC	61	63	2	GAA	63	66	3	GG	66	68	2		68	68	0	GCATGGCACTC	68	79	11	AT	79	81	2
50	caatgcttctcgtgatacccagatcatatgaaacagcatgactttttcaagagtgccatgcccgaaggGCATGGCACTCTTGAAAAAGTCAT	6	caatgcttctcgtgatacccagatcatatgaaacagc g atgactttttcaagagtgccatgccc a TACTGAAAAAGTTCTCACGGTACGgga	CAATGCTTCTCGTGATACCCAGATCATATGAAACAGC	0	37	37	ATGACTTTTTCAAGAGTGCCATGC	37	61	24	CC	61	63	2	GAA	63	66	3	GG	66	68	2		68	68	0	GCATGGCACTCTTGAAAAAGTCAT	68	92	24		92	92	0
51	caatgcttctcgtgatacccagatcatatgaaacagcatgactttttcaagagtgccatgcccgaaggGCA	6	caatgcttctcgtgatacccagatcatatgaaacagcatgactttttcaagagtgcca g tgccc a ACGgga	CAATGCTTCTCGTGATACCCAGATCATATGAAACAGCATGACTTTTTCAAGAGTGCCA	0	58	58	TGC	58	61	3	CC	61	63	2	GAA	63	66	3	GG	66	68	2		68	68	0	GCA	68	71	3		71	71	0
52	caatgcttctcgtgatacccagatcatatgaaacagcatgactttttcaagagtgccatgcccgaaggGCACTCTTGAAAAA	6	caatgcttctcgtgatacccagatcatatgaaacagcatgac atgc tttttcaagagtgcc c AAAAAGTTCTCACGg c gaag	CAATGCTTCTCGTGATACCCAGATCATATGAAACAGCATGAC	0	42	42	TTTTTCAAGAGTGC	42	56	14	C	56	57	1	ATGCCCGAAG	57	67	10	G	67	68	1		68	68	0	GCACTCTTGAAAAA	68	82	14		82	82	0
53	caatgcttctcgtgatacccagatcatatgaaacagcatgactttttcaagagtgccatgcccgaaggGGCATGGCACTCTTGAAAAAGTCAT	6	caatgcttctcgtgatacccagatcatatgaaacagc g atgactttttcaagagtgccatgccc a TACTGAAAAAGTTCTCACGGTACGGg a g	CAATGCTTCTCGTGATACCCAGATCATATGAAACAGC	0	37	37	ATGACTTTTTCAAGAGTGCCATGCC	37	62	25	C	62	63	1	GAAG	63	67	4	G	67	68	1		68	68	0	GGCATGGCACTCTTGAAAAAGTCAT	68	93	25		93	93	0
54	caatgcttctcgtgatacccagatcatatgaaacagcatgactttttcaagagtgccatgcccgaaggGTCATGCTGTTTCATAT	6	caatgcttctcgtgatacccagatc tttttcaagagt atatgaaacagcatgac g TATACTTTGTCGTACTG c ggaagcccgtac	CAATGCTTCTCGTGATACCCAGATC	0	25	25	ATATGAAACAGCATGAC	25	42	17		42	42	0	TTTTTCAAGAGTGCCATGCCCGAAGG	42	68	26		68	68	0		68	68	0	GTCATGCTGTTTCATAT	68	85	17		85	85	0
55	caatgcttctcgtgatacccagatcatatgaaacagcatgactttttcaagagtgccatgcccgaaggCCTGGCACTCTTGAAAAAGTC	5	caatgcttctcgtgatacccagatcatatgaaacagcat tgccc gactttttcaagagtgcca g CTGAAAAAGTTCTCACGGT a CCgga	CAATGCTTCTCGTGATACCCAGATCATATGAAACAGCAT	0	39	39	GACTTTTTCAAGAGTGCCA	39	58	19		58	58	0	TGCCCGAAGG	58	68	10		68	68	0	CC	68	70	2	TGGCACTCTTGAAAAAGTC	70	89	19		89	89	0
56	caatgcttctcgtgatacccagatcatatgaaacagcatgactttttcaagagtgccatgcccgaaggTCATGCTGTTTCATATGAT	5	caatgcttctcgtgatacccag tttttcaagagt atcatatgaaacagcatgac g TAGTATACTTTGTCGTACTggaagcccgtacc	CAATGCTTCTCGTGATACCCAG	0	22	22	ATCATATGAAACAGCATGA	22	41	19	C	41	42	1	TTTTTCAAGAGTGCCATGCCCGAAG	42	67	25	G	67	68	1		68	68	0	TCATGCTGTTTCATATGAT	68	87	19		87	87	0
57	caatgcttctcgtgatacccagatcatatgaaacagcatgactttttcaagagtgccatgcccgaaggGTATCACGAGAAGCATTG	5	agatcatatgaaacagcatgac caatgcttctcgtgataccc t GTTACGAAGAGCACTATGgg t aagcccgtaccgtgagaacttt		0	0	0	CAATGCTTCTCGTGATAC	0	18	18	CC	18	20	2	AGATCATATGAAACAGCATGACTTTTTCAAGAGTGCCATGCCCGAA	20	66	46	GG	66	68	2		68	68	0	GTATCACGAGAAGCATTG	68	86	18		86	86	0
58	caatgcttctcgtgatacccagatcatatgaaacagcatgactttttcaagagtgccatgcccgaaggGGCATGGCACTCTTGAAAAAGTC	5	caatgcttctcgtgatacccagatcatatgaaacagcat g gactttttcaagagtgccatgccc a CTGAAAAAGTTCTCACGGTACGGg a g	CAATGCTTCTCGTGATACCCAGATCATATGAAACAGCAT	0	39	39	GACTTTTTCAAGAGTGCCATGCC	39	62	23	C	62	63	1	GAAG	63	67	4	G	67	68	1		68	68	0	GGCATGGCACTCTTGAAAAAGTC	68	91	23		91	91	0
59	caatgcttctcgtgatacccagatcatatgaaacagcatgactttttcaagagtgccatgcccgaaggGTATCACGAGAAGCATTGAA	5	agatcatatgaaacagcatgac caatgcttctcgtgataccc t GTTACGAAGAGCACTATGgg t AA aagcccgtaccgtgagaacttt		0	0	0	CAATGCTTCTCGTGATAC	0	18	18	CC	18	20	2	AGATCATATGAAACAGCATGACTTTTTCAAGAGTGCCATGCCCGAA	20	66	46	GG	66	68	2		68	68	0	GTATCACGAGAAGCATTG	68	86	18	AA	86	88	2
60	caatgcttctcgtgatacccagatcatatgaaacagcatgactttttcaagagtgccatgcccgaaggGTATCACGAGAAGCATTGGA	5	agatcatatgaaacagcatgac caatgcttctcgtgataccc t GTTACGAAGAGCACTATGgg t AG aagcccgtaccgtgagaacttt		0	0	0	CAATGCTTCTCGTGATAC	0	18	18	CC	18	20	2	AGATCATATGAAACAGCATGACTTTTTCAAGAGTGCCATGCCCGAA	20	66	46	GG	66	68	2		68	68	0	GTATCACGAGAAGCATTG	68	86	18	GA	86	88	2
61	caatgcttctcgtgatacccagatcatatgaaacagcatgactttttcaagagtgccatgcccgaaggGGCATGGCAC	5	caatgcttctcgtgatacccagatcatatgaaacagcatgactttttcaaga g gtgccatgccc a CACGGTACGGg a g	CAATGCTTCTCGTGATACCCAGATCATATGAAACAGCATGACTTTTTCAAGA	0	52	52	GTGCCATGCC	52	62	10	C	62	63	1	GAAG	63	67	4	G	67	68	1		68	68	0	GGCATGGCAC	68	78	10		78	78	0
62	caatgcttctcgtgatacccagatcatatgaaacagcatgactttttcaagagtgccatgcccgaaggGCATGGCACT	5	caatgcttctcgtgatacccagatcatatgaaacagcatgactttttcaag g agtgccatgccc a TCACGGTACGgga	CAATGCTTCTCGTGATACCCAGATCATATGAAACAGCATGACTTTTTCAAG	0	51	51	AGTGCCATGC	51	61	10	CC	61	63	2	GAA	63	66	3	GG	66	68	2		68	68	0	GCATGGCACT	68	78	10		78	78	0
63	caatgcttctcgtgatacccagatcatatgaaacagcatgactttttcaagagtgccatgcccgaaggGTATCACGAGA	5	caatgct agatcatatgaaacagcatgac tctcgtgataccc t AGAGCACTATGgg t aagcccgtaccgtgagaacttt	CAATGCT	0	7	7	TCTCGTGATAC	7	18	11	CC	18	20	2	AGATCATATGAAACAGCATGACTTTTTCAAGAGTGCCATGCCCGAA	20	66	46	GG	66	68	2		68	68	0	GTATCACGAGA	68	79	11		79	79	0
64	caatgcttctcgtgatacccagatcatatgaaacagcatgactttttcaagagtgccatgcccgaaggGTCATGCTGTTTCATATGATCT	5	caatgcttctcgtgataccc tttttcaagagt agatcatatgaaacagcatgac g TCTAGTATACTTTGTCGTACTG c ggaagcccgtac	CAATGCTTCTCGTGATACCC	0	20	20	AGATCATATGAAACAGCATGAC	20	42	22		42	42	0	TTTTTCAAGAGTGCCATGCCCGAAGG	42	68	26		68	68	0		68	68	0	GTCATGCTGTTTCATATGATCT	68	90	22		90	90	0
65	caatgcttctcgtgatacccagatcatatgaaacagcatgactttttcaagagtgccatgcccgaaggGCACTCTTGAAAAAGTCATGCT	5	caatgcttctcgtgatacccagatcatatgaaac atgc agcatgactttttcaagagtgcc c TCGTACTGAAAAAGTTCTCACGg c gaag	CAATGCTTCTCGTGATACCCAGATCATATGAAAC	0	34	34	AGCATGACTTTTTCAAGAGTGC	34	56	22	C	56	57	1	ATGCCCGAAG	57	67	10	G	67	68	1		68	68	0	GCACTCTTGAAAAAGTCATGCT	68	90	22		90	90	0
66	caatgcttctcgtgatacccagatcatatgaaacagcatgactttttcaagagtgccatgcccgaaggGCATGGCACTCTTGAAAAAG	5	caatgcttctcgtgatacccagatcatatgaaacagcatga g ctttttcaagagtgccatgccc a GAAAAAGTTCTCACGGTACGgga	CAATGCTTCTCGTGATACCCAGATCATATGAAACAGCATGA	0	41	41	CTTTTTCAAGAGTGCCATGC	41	61	20	CC	61	63	2	GAA	63	66	3	GG	66	68	2		68	68	0	GCATGGCACTCTTGAAAAAG	68	88	20		88	88	0
67	caatgcttctcgtgatacccagatcatatgaaacagcatgactttttcaagagtgccatgcccgaaggCATGGCACTCTTGAAAAAGTC	5	caatgcttctcgtgatacccagatcatatgaaacagcat c gactttttcaagagtgccatgcc g CTGAAAAAGTTCTCACGGTACgg a a	CAATGCTTCTCGTGATACCCAGATCATATGAAACAGCAT	0	39	39	GACTTTTTCAAGAGTGCCATG	39	60	21	CC	60	62	2	CGAA	62	66	4	GG	66	68	2		68	68	0	CATGGCACTCTTGAAAAAGTC	68	89	21		89	89	0
68	caatgcttctcgtgatacccagatcatatgaaacagcatgactttttcaagagtgccatgcccgaaggAT	5	caatgcttctcgtgatacccag atatgaaacagcatgacttt atc t TAg t gaagcccgtaccgtgagaac	CAATGCTTCTCGTGATACCCAG	0	22	22	AT	22	24	2	C	24	25	1	ATATGAAACAGCATGACTTTTTCAAGAGTGCCATGCCCGAAG	25	67	42	G	67	68	1		68	68	0	AT	68	70	2		70	70	0
69	caatgcttctcgtgatacccagatcatatgaaacagcatgactttttcaagagtgccatgcccgaaggAC	5	caatgcttctcgtgatacccagatcatatgaaacagcatgactttttcaagagtgccatgcccgaag g A C	CAATGCTTCTCGTGATACCCAGATCATATGAAACAGCATGACTTTTTCAAGAGTGCCATGCCCGAAGG	0	68	68		68	68	0		68	68	0		68	68	0		68	68	0		70	70	0		70	70	0		70	70	0
70	caatgcttctcgtgatacccagatcatatgaaacagcatgactttttcaagagtgccatgcccgaaggCATGGCACTCTT	5	caatgcttctcgtgatacccagatcatatgaaacagcatgactttttc c aagagtgccatgcc g TTCTCACGGTACgg a a	CAATGCTTCTCGTGATACCCAGATCATATGAAACAGCATGACTTTTTC	0	48	48	AAGAGTGCCATG	48	60	12	CC	60	62	2	CGAA	62	66	4	GG	66	68	2		68	68	0	CATGGCACTCTT	68	80	12		80	80	0
71	caatgcttctcgtgatacccagatcatatgaaacagcatgactttttcaagagtgccatgcccgaaggGGCATGGCACTCC	4	caatgcttctcgtgatacccagatcatatgaaacagcatgactttttcaa g gagtgccatgccc a CTCACGGTACGGg a C g	CAATGCTTCTCGTGATACCCAGATCATATGAAACAGCATGACTTTTTCAA	0	50	50	GAGTGCCATGCC	50	62	12	C	62	63	1	GAAG	63	67	4	G	67	68	1		68	68	0	GGCATGGCACTC	68	80	12	C	80	81	1
72	caatgcttctcgtgatacccagatcatatgaaacagcatgactttttcaagagtgccatgcccgaaggCAAT	4	caatgcttctcgtgatacccagatcatatgaaacagcatgactttttcaagagtgcca c tgcc g ACgg a TA a	CAATGCTTCTCGTGATACCCAGATCATATGAAACAGCATGACTTTTTCAAGAGTGCCA	0	58	58	TG	58	60	2	CC	60	62	2	CGAA	62	66	4	GG	66	68	2		68	68	0	CA	68	70	2	AT	70	72	2
73	caatgcttctcgtgatacccagatcatatgaaacagcatgactttttcaagagtgccatgcccgaaggCCTGGCACTCTTGAAAAAG	4	caatgcttctcgtgatacccagatcatatgaaacagcatga tgccc ctttttcaagagtgcca g GAAAAAGTTCTCACGGT a CCgga	CAATGCTTCTCGTGATACCCAGATCATATGAAACAGCATGA	0	41	41	CTTTTTCAAGAGTGCCA	41	58	17		58	58	0	TGCCCGAAGG	58	68	10		68	68	0	CC	68	70	2	TGGCACTCTTGAAAAAG	70	87	17		87	87	0
74	caatgcttctcgtgatacccagatcatatgaaacagcatgactttttcaagagtgccatgcccgaaggGCACTCTTGAAAAAGTCAT	4	caatgcttctcgtgatacccagatcatatgaaacagc atgc atgactttttcaagagtgcc c TACTGAAAAAGTTCTCACGg c gaag	CAATGCTTCTCGTGATACCCAGATCATATGAAACAGC	0	37	37	ATGACTTTTTCAAGAGTGC	37	56	19	C	56	57	1	ATGCCCGAAG	57	67	10	G	67	68	1		68	68	0	GCACTCTTGAAAAAGTCAT	68	87	19		87	87	0
75	caatgcttctcgtgatacccagatcatatgaaacagcatgactttttcaagagtgccatgcccgaaggCAT	4	caatgcttctcgtgatacccagatcatatgaaacagcatgactttttcaagagtgcc c atgcc g TACgg a a	CAATGCTTCTCGTGATACCCAGATCATATGAAACAGCATGACTTTTTCAAGAGTGCC	0	57	57	ATG	57	60	3	CC	60	62	2	CGAA	62	66	4	GG	66	68	2		68	68	0	CAT	68	71	3		71	71	0
76	caatgcttctcgtgatacccagatcatatgaaacagcatgactttttcaagagtgccatgcccgaaggGCACTCTTGAAAAAGTC	4	caatgcttctcgtgatacccagatcatatgaaacagcat atgc gactttttcaagagtgcc c CTGAAAAAGTTCTCACGg c gaag	CAATGCTTCTCGTGATACCCAGATCATATGAAACAGCAT	0	39	39	GACTTTTTCAAGAGTGC	39	56	17	C	56	57	1	ATGCCCGAAG	57	67	10	G	67	68	1		68	68	0	GCACTCTTGAAAAAGTC	68	85	17		85	85	0
77	caatgcttctcgtgatacccagatcatatgaaacagcatgactttttcaagagtgccatgcccgaaggGTATCACGAGAAGCATTGT	4	agatcatatgaaacagcatgac caatgcttctcgtgataccc t GTTACGAAGAGCACTATGgg t T aagcccgtaccgtgagaacttt		0	0	0	CAATGCTTCTCGTGATAC	0	18	18	CC	18	20	2	AGATCATATGAAACAGCATGACTTTTTCAAGAGTGCCATGCCCGAA	20	66	46	GG	66	68	2		68	68	0	GTATCACGAGAAGCATTG	68	86	18	T	86	87	1
78	caatgcttctcgtgatacccagatcatatgaaacagcatgactttttcaagagtgccatgcccgaaggAA	4	caatgcttctcgtgatacccagatcatatgaaacagcatgacttt aagagtgcc ttc a AAggaagcccgt	CAATGCTTCTCGTGATACCCAGATCATATGAAACAGCATGACTTT	0	45	45	TT	45	47	2	C	47	48	1	AAGAGTGCCATGCCCGAAG	48	67	19	G	67	68	1		68	68	0	AA	68	70	2		70	70	0
79	caatgcttctcgtgatacccagatcatatgaaacagcatgactttttcaagagtgccatgcccgaaggGCATGGCACACT	4	caatgcttctcgtgatacccagatcatatgaaacagcatgactttttcaaga g gtgccatgccc a CACGGTACGgga TCA	CAATGCTTCTCGTGATACCCAGATCATATGAAACAGCATGACTTTTTCAAGA	0	52	52	GTGCCATGC	52	61	9	CC	61	63	2	GAA	63	66	3	GG	66	68	2		68	68	0	GCATGGCAC	68	77	9	ACT	77	80	3
80	caatgcttctcgtgatacccagatcatatgaaacagcatgactttttcaagagtgccatgcccgaaggGCATGGCACTCTTGAAAAGTCATGCT	4	caatgcttctcgtgatacccagatcatatgaaacagcatgact g ttttcaagagtgccatgccc a AAAAGTTCTCACGGTACGgga TCGTACTG	CAATGCTTCTCGTGATACCCAGATCATATGAAACAGCATGACT	0	43	43	TTTTCAAGAGTGCCATGC	43	61	18	CC	61	63	2	GAA	63	66	3	GG	66	68	2		68	68	0	GCATGGCACTCTTGAAAA	68	86	18	GTCATGCT	86	94	8
81	caatgcttctcgtgatacccagatcatatgaaacagcatgactttttcaagagtgccatgcccgaaggGTCATGCTGT	4	caatgcttctcgtgatacccagatcatatgaa tttttcaagagt acagcatgac g TGTCGTACTG c ggaagcccgtac	CAATGCTTCTCGTGATACCCAGATCATATGAA	0	32	32	ACAGCATGAC	32	42	10		42	42	0	TTTTTCAAGAGTGCCATGCCCGAAGG	42	68	26		68	68	0		68	68	0	GTCATGCTGT	68	78	10		78	78	0
82	caatgcttctcgtgatacccagatcatatgaaacagcatgactttttcaagagtgccatgcccgaaggGCAA	4	caatgcttctcgtgatacccagatcatatgaaacagcatgactttttcaagagtgcca g tgccc a ACGgga A	CAATGCTTCTCGTGATACCCAGATCATATGAAACAGCATGACTTTTTCAAGAGTGCCA	0	58	58	TGC	58	61	3	CC	61	63	2	GAA	63	66	3	GG	66	68	2		68	68	0	GCA	68	71	3	A	71	72	1
83	caatgcttctcgtgatacccagatcatatgaaacagcatgactttttcaagagtgccatgcccgaaggTCATGCTGTTTA	4	caatgcttctcgtgatacccagatcatatg tttttcaagagt aaacagcatgac g TTTGTCGTACTggaagcccgtacc A	CAATGCTTCTCGTGATACCCAGATCATATG	0	30	30	AAACAGCATGA	30	41	11	C	41	42	1	TTTTTCAAGAGTGCCATGCCCGAAG	42	67	25	G	67	68	1		68	68	0	TCATGCTGTTT	68	79	11	A	79	80	1
84	caatgcttctcgtgatacccagatcatatgaaacagcatgactttttcaagagtgccatgcccgaaggGGCATGGCACC	4	caatgcttctcgtgatacccagatcatatgaaacagcatgactttttcaaga g gtgccatgccc a CACGGTACGGg a C g	CAATGCTTCTCGTGATACCCAGATCATATGAAACAGCATGACTTTTTCAAGA	0	52	52	GTGCCATGCC	52	62	10	C	62	63	1	GAAG	63	67	4	G	67	68	1		68	68	0	GGCATGGCAC	68	78	10	C	78	79	1
85	caatgcttctcgtgatacccagatcatatgaaacagcatgactttttcaagagtgccatgcccgaaggGCATGGCACA	4	caatgcttctcgtgatacccagatcatatgaaacagcatgactttttcaaga g gtgccatgccc a CACGGTACGgga A	CAATGCTTCTCGTGATACCCAGATCATATGAAACAGCATGACTTTTTCAAGA	0	52	52	GTGCCATGC	52	61	9	CC	61	63	2	GAA	63	66	3	GG	66	68	2		68	68	0	GCATGGCAC	68	77	9	A	77	78	1
86	caatgcttctcgtgatacccagatcatatgaaacagcatgactttttcaagagtgccatgcccgaaggGTATCACGAGAAGCATTGC	4	agatcatatgaaacagcatgac caatgcttctcgtgataccc t GTTACGAAGAGCACTATGgg t C aagcccgtaccgtgagaacttt		0	0	0	CAATGCTTCTCGTGATAC	0	18	18	CC	18	20	2	AGATCATATGAAACAGCATGACTTTTTCAAGAGTGCCATGCCCGAA	20	66	46	GG	66	68	2		68	68	0	GTATCACGAGAAGCATTG	68	86	18	C	86	87	1
87	caatgcttctcgtgatacccagatcatatgaaacagcatgactttttcaagagtgccatgcccgaaggGGCATGGCACTCTTGAAAAAGTCATGCT	4	caatgcttctcgtgatacccagatcatatgaaac g agcatgactttttcaagagtgccatgccc a TCGTACTGAAAAAGTTCTCACGGTACGGg a g	CAATGCTTCTCGTGATACCCAGATCATATGAAAC	0	34	34	AGCATGACTTTTTCAAGAGTGCCATGCC	34	62	28	C	62	63	1	GAAG	63	67	4	G	67	68	1		68	68	0	GGCATGGCACTCTTGAAAAAGTCATGCT	68	96	28		96	96	0
88	caatgcttctcgtgatacccagatcatatgaaacagcatgactttttcaagagtgccatgcccgaaggCATGGCAC	4	caatgcttctcgtgatacccagatcatatgaaacagcatgactttttcaaga c gtgccatgcc g CACGGTACgg a a	CAATGCTTCTCGTGATACCCAGATCATATGAAACAGCATGACTTTTTCAAGA	0	52	52	GTGCCATG	52	60	8	CC	60	62	2	CGAA	62	66	4	GG	66	68	2		68	68	0	CATGGCAC	68	76	8		76	76	0
89	caatgcttctcgtgatacccagatcatatgaaacagcatgactttttcaagagtgccatgcccgaaggCAATGC	4	caatgcttctcgtgatacccagatcatatgaaacagcatgactttttcaagagtgcca c tgcc g ACgg a CGTA a	CAATGCTTCTCGTGATACCCAGATCATATGAAACAGCATGACTTTTTCAAGAGTGCCA	0	58	58	TG	58	60	2	CC	60	62	2	CGAA	62	66	4	GG	66	68	2		68	68	0	CA	68	70	2	ATGC	70	74	4
90	caatgcttctcgtgatacccagatcatatgaaacagcatgactttttcaagagtgccatgcccgaaggGC	4	caatgcttctcgtgatacccagatcatatgaaacagcatgactttttcaagagtgccat g gccc a CGgga	CAATGCTTCTCGTGATACCCAGATCATATGAAACAGCATGACTTTTTCAAGAGTGCCAT	0	59	59	GC	59	61	2	CC	61	63	2	GAA	63	66	3	GG	66	68	2		68	68	0	GC	68	70	2		70	70	0
91	caatgcttctcgtgatacccagatcatatgaaacagcatgactttttcaagagtgccatgcccgaaggCACTCTTGAAAAGTCATGCTGT	4	caatgcttctcgtgatacccagatcatatgaaacagcatgact atgc ttttcaagagtgcc c AAAAGTTCTCACggaagc TGTCGTACTG	CAATGCTTCTCGTGATACCCAGATCATATGAAACAGCATGACT	0	43	43	TTTTCAAGAGTG	43	55	12	CC	55	57	2	ATGCCCGAA	57	66	9	GG	66	68	2		68	68	0	CACTCTTGAAAA	68	80	12	GTCATGCTGT	80	90	10
92	caatgcttctcgtgatacccagatcatatgaaacagcatgactttttcaagagtgccatgcccgaaggGCAT	4	caatgcttctcgtgatacccagatcatatgaaacagcatgactttttcaagagtgcc g atgccc a TACGgga	CAATGCTTCTCGTGATACCCAGATCATATGAAACAGCATGACTTTTTCAAGAGTGCC	0	57	57	ATGC	57	61	4	CC	61	63	2	GAA	63	66	3	GG	66	68	2		68	68	0	GCAT	68	72	4		72	72	0
93	caatgcttctcgtgatacccagatcatatgaaacagcatgactttttcaagagtgccatgcccgaaggGGC	3	caatgcttctcgtgatacccagatcatatgaaacagcatgactttttcaagagtgccat g gccc a CGGg a g	CAATGCTTCTCGTGATACCCAGATCATATGAAACAGCATGACTTTTTCAAGAGTGCCAT	0	59	59	GCC	59	62	3	C	62	63	1	GAAG	63	67	4	G	67	68	1		68	68	0	GGC	68	71	3		71	71	0
94	caatgcttctcgtgatacccagatcatatgaaacagcatgactttttcaagagtgccatgcccgaaggCATGGCACTCTTGAAAAAGA	3	caatgcttctcgtgatacccagatcatatgaaacagcatga c ctttttcaagagtgccatgcc g GAAAAAGTTCTCACGGTACgg a A a	CAATGCTTCTCGTGATACCCAGATCATATGAAACAGCATGA	0	41	41	CTTTTTCAAGAGTGCCATG	41	60	19	CC	60	62	2	CGAA	62	66	4	GG	66	68	2		68	68	0	CATGGCACTCTTGAAAAAG	68	87	19	A	87	88	1
95	caatgcttctcgtgatacccagatcatatgaaacagcatgactttttcaagagtgccatgcccgaaggTCATGCTGTTTCATATA	3	caatgcttctcgtgatacccagatc tttttcaagagt atatgaaacagcatgac g TATACTTTGTCGTACTggaagcccgtacc A	CAATGCTTCTCGTGATACCCAGATC	0	25	25	ATATGAAACAGCATGA	25	41	16	C	41	42	1	TTTTTCAAGAGTGCCATGCCCGAAG	42	67	25	G	67	68	1		68	68	0	TCATGCTGTTTCATAT	68	84	16	A	84	85	1
96	caatgcttctcgtgatacccagatcatatgaaacagcatgactttttcaagagtgccatgcccgaaggGGCATGGCACTCTTGAAAAAG	3	caatgcttctcgtgatacccagatcatatgaaacagcatga g ctttttcaagagtgccatgccc a GAAAAAGTTCTCACGGTACGGg a g	CAATGCTTCTCGTGATACCCAGATCATATGAAACAGCATGA	0	41	41	CTTTTTCAAGAGTGCCATGCC	41	62	21	C	62	63	1	GAAG	63	67	4	G	67	68	1		68	68	0	GGCATGGCACTCTTGAAAAAG	68	89	21		89	89	0
97	caatgcttctcgtgatacccagatcatatgaaacagcatgactttttcaagagtgccatgcccgaaggTCATGCTGTTTCATA	3	caatgcttctcgtgatacccagatca tttttcaagagt tatgaaacagcatgac g ATACTTTGTCGTACTggaagcccgtacc	CAATGCTTCTCGTGATACCCAGATCA	0	26	26	TATGAAACAGCATGA	26	41	15	C	41	42	1	TTTTTCAAGAGTGCCATGCCCGAAG	42	67	25	G	67	68	1		68	68	0	TCATGCTGTTTCATA	68	83	15		83	83	0
98	caatgcttctcgtgatacccagatcatatgaaacagcatgactttttcaagagtgccatgcccgaaggTCATGCTGTTTCATATGA	3	caatgcttctcgtgatacccaga tttttcaagagt tcatatgaaacagcatgac g AGTATACTTTGTCGTACTggaagcccgtacc	CAATGCTTCTCGTGATACCCAGA	0	23	23	TCATATGAAACAGCATGA	23	41	18	C	41	42	1	TTTTTCAAGAGTGCCATGCCCGAAG	42	67	25	G	67	68	1		68	68	0	TCATGCTGTTTCATATGA	68	86	18		86	86	0
99	caatgcttctcgtgatacccagatcatatgaaacagcatgactttttcaagagtgccatgcccgaaggGGCATGGCACTCG	3	caatgcttctcgtgatacccagatcatatgaaacagcatgactttttcaa g gagtgccatgccc a CTCACGGTACGGg a G g	CAATGCTTCTCGTGATACCCAGATCATATGAAACAGCATGACTTTTTCAA	0	50	50	GAGTGCCATGCC	50	62	12	C	62	63	1	GAAG	63	67	4	G	67	68	1		68	68	0	GGCATGGCACTC	68	80	12	G	80	81	1
100	caatgcttctcgtgatacccagatcatatgaaacagcatgactttttcaagagtgccatgcccgaaggCCCTCTTGAAAAAGTCATGCT	3	caatgcttctcgtgatacccagatcatatgaaac tgccatgc agcatgactttttcaagag c TCGTACTGAAAAAGTTCTCCCggaagc	CAATGCTTCTCGTGATACCCAGATCATATGAAAC	0	34	34	AGCATGACTTTTTCAAGAG	34	53	19		53	53	0	TGCCATGCCCGAAGG	53	68	15		68	68	0	CC	68	70	2	CTCTTGAAAAAGTCATGCT	70	89	19		89	89	0
101	caatgcttctcgtgatacccagatcatatgaaacagcatgactttttcaagagtgccatgcccgaaggGTC	3	caatgcttctcgtgat agatcatatgaaacagcatgac accc t TGgg t C aagcccgtaccgtgagaacttt	CAATGCTTCTCGTGAT	0	16	16	AC	16	18	2	CC	18	20	2	AGATCATATGAAACAGCATGACTTTTTCAAGAGTGCCATGCCCGAA	20	66	46	GG	66	68	2		68	68	0	GT	68	70	2	C	70	71	1
102	caatgcttctcgtgatacccagatcatatgaaacagcatgactttttcaagagtgccatgcccgaaggTCATGCTGTTTCATATGATCTGGGTATCACGA	3	caatgcttc tttttcaagagt tcgtgatacccagatcatatgaaacagcatgac g AGCACTATGGGTCTAGTATACTTTGTCGTACTggaagcccgtacc	CAATGCTTC	0	9	9	TCGTGATACCCAGATCATATGAAACAGCATGA	9	41	32	C	41	42	1	TTTTTCAAGAGTGCCATGCCCGAAG	42	67	25	G	67	68	1		68	68	0	TCATGCTGTTTCATATGATCTGGGTATCACGA	68	100	32		100	100	0
103	caatgcttctcgtgatacccagatcatatgaaacagcatgactttttcaagagtgccatgcccgaaggGGCATGGCACTA	3	caatgcttctcgtgatacccagatcatatgaaacagcatgactttttcaag g agtgccatgccc a TCACGGTACGGg a A g	CAATGCTTCTCGTGATACCCAGATCATATGAAACAGCATGACTTTTTCAAG	0	51	51	AGTGCCATGCC	51	62	11	C	62	63	1	GAAG	63	67	4	G	67	68	1		68	68	0	GGCATGGCACT	68	79	11	A	79	80	1
104	caatgcttctcgtgatacccagatcatatgaaacagcatgactttttcaagagtgccatgcccgaaggCATGGCACTCT	3	caatgcttctcgtgatacccagatcatatgaaacagcatgactttttca c agagtgccatgcc g TCTCACGGTACgg a a	CAATGCTTCTCGTGATACCCAGATCATATGAAACAGCATGACTTTTTCA	0	49	49	AGAGTGCCATG	49	60	11	CC	60	62	2	CGAA	62	66	4	GG	66	68	2		68	68	0	CATGGCACTCT	68	79	11		79	79	0
105	caatgcttctcgtgatacccagatcatatgaaacagcatgactttttcaagagtgccatgcccgaaggCACTCTTGAAAAAGTCATGCTGTTTCAT	3	caatgcttctcgtgatacccagatcat atgc atgaaacagcatgactttttcaagagtgcc c TACTTTGTCGTACTGAAAAAGTTCTCACggaagc	CAATGCTTCTCGTGATACCCAGATCAT	0	27	27	ATGAAACAGCATGACTTTTTCAAGAGTG	27	55	28	CC	55	57	2	ATGCCCGAA	57	66	9	GG	66	68	2		68	68	0	CACTCTTGAAAAAGTCATGCTGTTTCAT	68	96	28		96	96	0
106	caatgcttctcgtgatacccagatcatatgaaacagcatgactttttcaagagtgccatgcccgaaggCAATGCTTCTCA	3	caatgcttctcgtgatacccagatcatatgaaacagcatgactttttcaagagtgcca c tgcc g ACgg a ACTCTTCGTA a	CAATGCTTCTCGTGATACCCAGATCATATGAAACAGCATGACTTTTTCAAGAGTGCCA	0	58	58	TG	58	60	2	CC	60	62	2	CGAA	62	66	4	GG	66	68	2		68	68	0	CA	68	70	2	ATGCTTCTCA	70	80	10
107	caatgcttctcgtgatacccagatcatatgaaacagcatgactttttcaagagtgccatgcccgaaggCCATGCTGTTTCATGGCCTTCGGGCAT	3	caatgcttctcgtgatacccagatcat actttttcaagagt atgaaacagcatg g TACTTTGTCGTACCggaagcccgtacc TACGGGCTTCCGG	CAATGCTTCTCGTGATACCCAGATCAT	0	27	27	ATGAAACAGCATG	27	40	13		40	40	0	ACTTTTTCAAGAGTGCCATGCCCGAAGG	40	68	28		68	68	0	C	68	69	1	CATGCTGTTTCAT	69	82	13	GGCCTTCGGGCAT	82	95	13
108	caatgcttctcgtgatacccagatcatatgaaacagcatgactttttcaagagtgccatgcccgaaggTCATGCTGTTTCATG	3	caatgcttctcgtgatacccagatcat tttttcaagagt atgaaacagcatgac g TACTTTGTCGTACTggaagcccgtacc G	CAATGCTTCTCGTGATACCCAGATCAT	0	27	27	ATGAAACAGCATGA	27	41	14	C	41	42	1	TTTTTCAAGAGTGCCATGCCCGAAG	42	67	25	G	67	68	1		68	68	0	TCATGCTGTTTCAT	68	82	14	G	82	83	1
109	caatgcttctcgtgatacccagatcatatgaaacagcatgactttttcaagagtgccatgcccgaaggGCATGGCAC	3	caatgcttctcgtgatacccagatcatatgaaacagcatgactttttcaaga g gtgccatgccc a CACGGTACGgga	CAATGCTTCTCGTGATACCCAGATCATATGAAACAGCATGACTTTTTCAAGA	0	52	52	GTGCCATGC	52	61	9	CC	61	63	2	GAA	63	66	3	GG	66	68	2		68	68	0	GCATGGCAC	68	77	9		77	77	0
110	caatgcttctcgtgatacccagatcatatgaaacagcatgactttttcaagagtgccatgcccgaaggTCATGCTGTTTC	3	caatgcttctcgtgatacccagatcatat tttttcaagagt gaaacagcatgac g CTTTGTCGTACTggaagcccgtacc	CAATGCTTCTCGTGATACCCAGATCATAT	0	29	29	GAAACAGCATGA	29	41	12	C	41	42	1	TTTTTCAAGAGTGCCATGCCCGAAG	42	67	25	G	67	68	1		68	68	0	TCATGCTGTTTC	68	80	12		80	80	0
111	caatgcttctcgtgatacccagatcatatgaaacagcatgactttttcaagagtgccatgcccgaaggCCATGCTGTTTCATATGATCTGGGTATCA	3	caatgcttctcg actttttcaagagt tgatacccagatcatatgaaacagcatg g ACTATGGGTCTAGTATACTTTGTCGTACCggaagcccgtacc	CAATGCTTCTCG	0	12	12	TGATACCCAGATCATATGAAACAGCATG	12	40	28		40	40	0	ACTTTTTCAAGAGTGCCATGCCCGAAGG	40	68	28		68	68	0	C	68	69	1	CATGCTGTTTCATATGATCTGGGTATCA	69	97	28		97	97	0
112	caatgcttctcgtgatacccagatcatatgaaacagcatgactttttcaagagtgccatgcccgaaggTCATGCTGTTTCATATGG	3	caatgcttctcgtgatacccagat tttttcaagagt catatgaaacagcatgac g GTATACTTTGTCGTACTggaagcccgtacc G	CAATGCTTCTCGTGATACCCAGAT	0	24	24	CATATGAAACAGCATGA	24	41	17	C	41	42	1	TTTTTCAAGAGTGCCATGCCCGAAG	42	67	25	G	67	68	1		68	68	0	TCATGCTGTTTCATATG	68	85	17	G	85	86	1
113	caatgcttctcgtgatacccagatcatatgaaacagcatgactttttcaagagtgccatgcccgaaggTCATGCTGTTTCATATG	3	caatgcttctcgtgatacccagat tttttcaagagt catatgaaacagcatgac g GTATACTTTGTCGTACTggaagcccgtacc	CAATGCTTCTCGTGATACCCAGAT	0	24	24	CATATGAAACAGCATGA	24	41	17	C	41	42	1	TTTTTCAAGAGTGCCATGCCCGAAG	42	67	25	G	67	68	1		68	68	0	TCATGCTGTTTCATATG	68	85	17		85	85	0
114	caatgcttctcgtgatacccagatcatatgaaacagcatgactttttcaagagtgccatgcccgaaggCCT	3	caatgcttctcgtgatacccagatcatatgaaacagcatgactttttcaagagtgccatgcccga agg TCC	CAATGCTTCTCGTGATACCCAGATCATATGAAACAGCATGACTTTTTCAAGAGTGCCATGCCCGA	0	65	65	AGG	65	68	3		68	68	0		68	68	0		68	68	0		68	68	0	CCT	68	71	3		71	71	0
115	caatgcttctcgtgatacccagatcatatgaaacagcatgactttttcaagagtgccatgcccgaaggCACTCTTGAAAAAGTCATGA	3	caatgcttctcgtgatacccagatcatatgaaacag atgc catgactttttcaagagtgcc c GTACTGAAAAAGTTCTCACggaagc A	CAATGCTTCTCGTGATACCCAGATCATATGAAACAG	0	36	36	CATGACTTTTTCAAGAGTG	36	55	19	CC	55	57	2	ATGCCCGAA	57	66	9	GG	66	68	2		68	68	0	CACTCTTGAAAAAGTCATG	68	87	19	A	87	88	1
116	caatgcttctcgtgatacccagatcatatgaaacagcatgactttttcaagagtgccatgcccgaaggTC	3	caatgcttctcgtgatacccagatcatatgaaacagcat tttttcaagagt gac g CTggaagcccgtacc	CAATGCTTCTCGTGATACCCAGATCATATGAAACAGCAT	0	39	39	GA	39	41	2	C	41	42	1	TTTTTCAAGAGTGCCATGCCCGAAG	42	67	25	G	67	68	1		68	68	0	TC	68	70	2		70	70	0
117	caatgcttctcgtgatacccagatcatatgaaacagcatgactttttcaagagtgccatgcccgaaggCCTCTTGAAAAAGTCAT	3	caatgcttctcgtgatacccagatcatatgaaacagc tgccatg atgactttttcaagag c TACTGAAAAAGTTCTC c Cggaagc	CAATGCTTCTCGTGATACCCAGATCATATGAAACAGC	0	37	37	ATGACTTTTTCAAGAG	37	53	16		53	53	0	TGCCATGCCCGAAGG	53	68	15		68	68	0	C	68	69	1	CTCTTGAAAAAGTCAT	69	85	16		85	85	0
118	caatgcttctcgtgatacccagatcatatgaaacagcatgactttttcaagagtgccatgcccgaaggGCG	3	caatgcttctcgtgatacccagatcatatgaaacagcatgactttttcaagagtgccat g gccc a CGgga G	CAATGCTTCTCGTGATACCCAGATCATATGAAACAGCATGACTTTTTCAAGAGTGCCAT	0	59	59	GC	59	61	2	CC	61	63	2	GAA	63	66	3	GG	66	68	2		68	68	0	GC	68	70	2	G	70	71	1
119	caatgcttctcgtgatacccagatcatatgaaacagcatgactttttcaagagtgccatgcccgaaggGAC	3	caatgcttctcgtgatacccagatcatatgaaacagcatgactttttcaaga gccatgc gt c CAGggaagc	CAATGCTTCTCGTGATACCCAGATCATATGAAACAGCATGACTTTTTCAAGA	0	52	52	GT	52	54	2		54	54	0	GCCATGCCCGAAGG	54	68	14		68	68	0	G	68	69	1	AC	69	71	2		71	71	0
120	caatgcttctcgtgatacccagatcatatgaaacagcatgactttttcaagagtgccatgcccgaaggGCATGGCACTCTTGAAAAAGTCATGCT	2	caatgcttctcgtgatacccagatcatatgaaac g agcatgactttttcaagagtgccatgccc a TCGTACTGAAAAAGTTCTCACGGTACGgga	CAATGCTTCTCGTGATACCCAGATCATATGAAAC	0	34	34	AGCATGACTTTTTCAAGAGTGCCATGC	34	61	27	CC	61	63	2	GAA	63	66	3	GG	66	68	2		68	68	0	GCATGGCACTCTTGAAAAAGTCATGCT	68	95	27		95	95	0
121	caatgcttctcgtgatacccagatcatatgaaacagcatgactttttcaagagtgccatgcccgaaggCCATGGCACTCTTGAAAAAGAC	2	caatgcttctcgtgatacccagatcatatgaaacagcatga c ctttttcaagagtgccatg-cc g GAAAAAGTTCTCACGGTACCgg a CA a	CAATGCTTCTCGTGATACCCAGATCATATGAAACAGCATGA	0	41	41	CTTTTTCAAGAGTGCCATG	41	60	19	CC	60	62	2	CGAA	62	66	4	GG	66	68	2	C	68	69	1	CATGGCACTCTTGAAAAAG	69	88	19	AC	88	90	2
122	caatgcttctcgtgatacccagatcatatgaaacagcatgactttttcaagagtgccatgcccgaaggCATTGAAAAAGTCATGCTGT	2	caatgcttctcgtgatacccagatcatatgaa gagtgccat acagcatgactttttcaa g TGTCGTACTGAAAAAGTT c ACggaagcc	CAATGCTTCTCGTGATACCCAGATCATATGAA	0	32	32	ACAGCATGACTTTTTCAA	32	50	18		50	50	0	GAGTGCCATGCCCGAAGG	50	68	18		68	68	0	CA	68	70	2	TTGAAAAAGTCATGCTGT	70	88	18		88	88	0
123	caatgcttctcgtgatacccagatcatatgaaacagcatgactttttcaagagtgccatgcccgaaggCATGGCACTCTTGAAAAAGTCAT	2	caatgcttctcgtgatacccagatcatatgaaacagc c atgactttttcaagagtgccatgcc g TACTGAAAAAGTTCTCACGGTACgg a a	CAATGCTTCTCGTGATACCCAGATCATATGAAACAGC	0	37	37	ATGACTTTTTCAAGAGTGCCATG	37	60	23	CC	60	62	2	CGAA	62	66	4	GG	66	68	2		68	68	0	CATGGCACTCTTGAAAAAGTCAT	68	91	23		91	91	0
124	caatgcttctcgtgatacccagatcatatgaaacagcatgactttttcaagagtgccatgcccgaaggGTATCACGAGAAGCG	2	caat agatcatatgaaacagcatgac gcttctcgtgataccc t CGAAGAGCACTATGgg t G aagcccgtaccgtgagaacttt	CAAT	0	4	4	GCTTCTCGTGATAC	4	18	14	CC	18	20	2	AGATCATATGAAACAGCATGACTTTTTCAAGAGTGCCATGCCCGAA	20	66	46	GG	66	68	2		68	68	0	GTATCACGAGAAGC	68	82	14	G	82	83	1
125	caatgcttctcgtgatacccagatcatatgaaacagcatgactttttcaagagtgccatgcccgaaggCATGGCACTCTTGAAAT	2	caatgcttctcgtgatacccagatcatatgaaacagcatgactt c tttcaagagtgccatgcc g AAAGTTCTCACGGTACgg a T a	CAATGCTTCTCGTGATACCCAGATCATATGAAACAGCATGACTT	0	44	44	TTTCAAGAGTGCCATG	44	60	16	CC	60	62	2	CGAA	62	66	4	GG	66	68	2		68	68	0	CATGGCACTCTTGAAA	68	84	16	T	84	85	1
126	caatgcttctcgtgatacccagatcatatgaaacagcatgactttttcaagagtgccatgcccgaaggGCATGGCACTCTTGAAAT	2	caatgcttctcgtgatacccagatcatatgaaacagcatgactt g tttcaagagtgccatgccc a AAAGTTCTCACGGTACGgga T	CAATGCTTCTCGTGATACCCAGATCATATGAAACAGCATGACTT	0	44	44	TTTCAAGAGTGCCATGC	44	61	17	CC	61	63	2	GAA	63	66	3	GG	66	68	2		68	68	0	GCATGGCACTCTTGAAA	68	85	17	T	85	86	1
127	caatgcttctcgtgatacccagatcatatgaaacagcatgactttttcaagagtgccatgcccgaaggTCATGCTGTTTCATAGC	2	caatgcttctcgtgatacccagatca tttttcaagagt tatgaaacagcatgac g ATACTTTGTCGTACTggaagcccgtacc CG	CAATGCTTCTCGTGATACCCAGATCA	0	26	26	TATGAAACAGCATGA	26	41	15	C	41	42	1	TTTTTCAAGAGTGCCATGCCCGAAG	42	67	25	G	67	68	1		68	68	0	TCATGCTGTTTCATA	68	83	15	GC	83	85	2
128	caatgcttctcgtgatacccagatcatatgaaacagcatgactttttcaagagtgccatgcccgaaggCATGGCACTCTTGAAAAAG	2	caatgcttctcgtgatacccagatcatatgaaacagcatga c ctttttcaagagtgccatgcc g GAAAAAGTTCTCACGGTACgg a a	CAATGCTTCTCGTGATACCCAGATCATATGAAACAGCATGA	0	41	41	CTTTTTCAAGAGTGCCATG	41	60	19	CC	60	62	2	CGAA	62	66	4	GG	66	68	2		68	68	0	CATGGCACTCTTGAAAAAG	68	87	19		87	87	0
129	caatgcttctcgtgatacccagatcatatgaaacagcatgactttttcaagagtgccatgcccgaaggGGCATGGCAAA	2	caatgcttctcgtgatacccagatcatatgaaacagcatgactttttcaagag g tgccatgccc a ACGGTACGGg a AA g	CAATGCTTCTCGTGATACCCAGATCATATGAAACAGCATGACTTTTTCAAGAG	0	53	53	TGCCATGCC	53	62	9	C	62	63	1	GAAG	63	67	4	G	67	68	1		68	68	0	GGCATGGCA	68	77	9	AA	77	79	2
130	caatgcttctcgtgatacccagatcatatgaaacagcatgactttttcaagagtgccatgcccgaaggCAC	2	caatgcttctcgtgatacccagatcatatgaaacagcatgactttttcaaga atgc gtgcc c CACggaagc	CAATGCTTCTCGTGATACCCAGATCATATGAAACAGCATGACTTTTTCAAGA	0	52	52	GTG	52	55	3	CC	55	57	2	ATGCCCGAA	57	66	9	GG	66	68	2		68	68	0	CAC	68	71	3		71	71	0
131	caatgcttctcgtgatacccagatcatatgaaacagcatgactttttcaagagtgccatgcccgaaggGGCATGGCACTCTTGAAAA	2	caatgcttctcgtgatacccagatcatatgaaacagcatgact g ttttcaagagtgccatgccc a AAAAGTTCTCACGGTACGGg a g	CAATGCTTCTCGTGATACCCAGATCATATGAAACAGCATGACT	0	43	43	TTTTCAAGAGTGCCATGCC	43	62	19	C	62	63	1	GAAG	63	67	4	G	67	68	1		68	68	0	GGCATGGCACTCTTGAAAA	68	87	19		87	87	0
132	caatgcttctcgtgatacccagatcatatgaaacagcatgactttttcaagagtgccatgcccgaaggGCATGGCACTCTTGAT	2	caatgcttctcgtgatacccagatcatatgaaacagcatgactttt g tcaagagtgccatgccc a AGTTCTCACGGTACGgga T	CAATGCTTCTCGTGATACCCAGATCATATGAAACAGCATGACTTTT	0	46	46	TCAAGAGTGCCATGC	46	61	15	CC	61	63	2	GAA	63	66	3	GG	66	68	2		68	68	0	GCATGGCACTCTTGA	68	83	15	T	83	84	1
133	caatgcttctcgtgatacccagatcatatgaaacagcatgactttttcaagagtgccatgcccgaaggCCC	2	caatgcttctcgtgatacccagatcatatgaaacagcatgactttttcaagagtgccatgcccgaag g C CC	CAATGCTTCTCGTGATACCCAGATCATATGAAACAGCATGACTTTTTCAAGAGTGCCATGCCCGAAGG	0	68	68		68	68	0		68	68	0		68	68	0		68	68	0		71	71	0		71	71	0		71	71	0
134	caatgcttctcgtgatacccagatcatatgaaacagcatgactttttcaagagtgccatgcccgaaggTCATGCTGTTTCAA	2	caatgcttctcgtgatacccagatcata tttttcaagagt tgaaacagcatgac g ACTTTGTCGTACTggaagcccgtacc A	CAATGCTTCTCGTGATACCCAGATCATA	0	28	28	TGAAACAGCATGA	28	41	13	C	41	42	1	TTTTTCAAGAGTGCCATGCCCGAAG	42	67	25	G	67	68	1		68	68	0	TCATGCTGTTTCA	68	81	13	A	81	82	1
135	caatgcttctcgtgatacccagatcatatgaaacagcatgactttttcaagagtgccatgcccgaaggCACTCTTGAAAAAGTCA	2	caatgcttctcgtgatacccagatcatatgaaacagca atgc tgactttttcaagagtgcc c ACTGAAAAAGTTCTCACggaagc	CAATGCTTCTCGTGATACCCAGATCATATGAAACAGCA	0	38	38	TGACTTTTTCAAGAGTG	38	55	17	CC	55	57	2	ATGCCCGAA	57	66	9	GG	66	68	2		68	68	0	CACTCTTGAAAAAGTCA	68	85	17		85	85	0
136	caatgcttctcgtgatacccagatcatatgaaacagcatgactttttcaagagtgccatgcccgaaggGCAC	2	caatgcttctcgtgatacccagatcatatgaaacagcatgactttttcaaga atgc gtgcc c CACGg c gaag	CAATGCTTCTCGTGATACCCAGATCATATGAAACAGCATGACTTTTTCAAGA	0	52	52	GTGC	52	56	4	C	56	57	1	ATGCCCGAAG	57	67	10	G	67	68	1		68	68	0	GCAC	68	72	4		72	72	0
137	caatgcttctcgtgatacccagatcatatgaaacagcatgactttttcaagagtgccatgcccgaaggCACTCTTGAAAAAGAGTGCCTTCG	2	caatgcttctcgtgatacccagatcatatgaaacagcatga atgc ctttttcaagagtgcc c GAAAAAGTTCTCACggaagc GCTTCCGTGA	CAATGCTTCTCGTGATACCCAGATCATATGAAACAGCATGA	0	41	41	CTTTTTCAAGAGTG	41	55	14	CC	55	57	2	ATGCCCGAA	57	66	9	GG	66	68	2		68	68	0	CACTCTTGAAAAAG	68	82	14	AGTGCCTTCG	82	92	10
138	caatgcttctcgtgatacccagatcatatgaaacagcatgactttttcaagagtgccatgcccgaaggGTCATGCTGTTTCATGACCCTTCGGGCAT	2	caatgcttctcgtgatacccagatcat tttttcaagagt atgaaacagcatgac g TACTTTGTCGTACTG c TACGGGCTTCCCAG ggaagcccgtac	CAATGCTTCTCGTGATACCCAGATCAT	0	27	27	ATGAAACAGCATGAC	27	42	15		42	42	0	TTTTTCAAGAGTGCCATGCCCGAAGG	42	68	26		68	68	0		68	68	0	GTCATGCTGTTTCAT	68	83	15	GACCCTTCGGGCAT	83	97	14
139	caatgcttctcgtgatacccagatcatatgaaacagcatgactttttcaagagtgccatgcccgaaggTCATGCTGTT	2	caatgcttctcgtgatacccagatcatatga tttttcaagagt aacagcatgac g TTGTCGTACTggaagcccgtacc	CAATGCTTCTCGTGATACCCAGATCATATGA	0	31	31	AACAGCATGA	31	41	10	C	41	42	1	TTTTTCAAGAGTGCCATGCCCGAAG	42	67	25	G	67	68	1		68	68	0	TCATGCTGTT	68	78	10		78	78	0
140	caatgcttctcgtgatacccagatcatatgaaacagcatgactttttcaagagtgccatgcccgaaggTCATGCTGTTTCATATGATCTGGGT	2	caatgcttctcgtgat tttttcaagagt acccagatcatatgaaacagcatgac g TGGGTCTAGTATACTTTGTCGTACTggaagcccgtacc	CAATGCTTCTCGTGAT	0	16	16	ACCCAGATCATATGAAACAGCATGA	16	41	25	C	41	42	1	TTTTTCAAGAGTGCCATGCCCGAAG	42	67	25	G	67	68	1		68	68	0	TCATGCTGTTTCATATGATCTGGGT	68	93	25		93	93	0
141	caatgcttctcgtgatacccagatcatatgaaacagcatgactttttcaagagtgccatgcccgaaggCAATGCTTCTCGTGATACCCAGATCATATGAAAC	2	caatgcttctcgtgatacccagatcatatgaaacagcatgactttttcaagagtgcca c tgcc g ACgg a CAAAGTATACTAGACCCATAGTGCTCTTCGTA a	CAATGCTTCTCGTGATACCCAGATCATATGAAACAGCATGACTTTTTCAAGAGTGCCA	0	58	58	TG	58	60	2	CC	60	62	2	CGAA	62	66	4	GG	66	68	2		68	68	0	CA	68	70	2	ATGCTTCTCGTGATACCCAGATCATATGAAAC	70	102	32
142	caatgcttctcgtgatacccagatcatatgaaacagcatgactttttcaagagtgccatgcccgaaggGGCATGGCACTCAT	2	caatgcttctcgtgatacccagatcatatgaaacagcatgactttttcaa g gagtgccatgccc a CTCACGGTACGGg a TA g	CAATGCTTCTCGTGATACCCAGATCATATGAAACAGCATGACTTTTTCAA	0	50	50	GAGTGCCATGCC	50	62	12	C	62	63	1	GAAG	63	67	4	G	67	68	1		68	68	0	GGCATGGCACTC	68	80	12	AT	80	82	2
143	caatgcttctcgtgatacccagatcatatgaaacagcatgactttttcaagagtgccatgcccgaaggGCATGGCACTCTTGAAAA	2	caatgcttctcgtgatacccagatcatatgaaacagcatgact g ttttcaagagtgccatgccc a AAAAGTTCTCACGGTACGgga	CAATGCTTCTCGTGATACCCAGATCATATGAAACAGCATGACT	0	43	43	TTTTCAAGAGTGCCATGC	43	61	18	CC	61	63	2	GAA	63	66	3	GG	66	68	2		68	68	0	GCATGGCACTCTTGAAAA	68	86	18		86	86	0
144	caatgcttctcgtgatacccagatcatatgaaacagcatgactttttcaagagtgccatgcccgaaggGCATGGCACTCTTGAAAAAGT	2	caatgcttctcgtgatacccagatcatatgaaacagcatg g actttttcaagagtgccatgccc a TGAAAAAGTTCTCACGGTACGgga	CAATGCTTCTCGTGATACCCAGATCATATGAAACAGCATG	0	40	40	ACTTTTTCAAGAGTGCCATGC	40	61	21	CC	61	63	2	GAA	63	66	3	GG	66	68	2		68	68	0	GCATGGCACTCTTGAAAAAGT	68	89	21		89	89	0
145	caatgcttctcgtgatacccagatcatatgaaacagcatgactttttcaagagtgccatgcccgaaggAAGCATTGAA	2	tcgtgatacccagatcatatgaaacagc caatgcttc a GTTACGAAg t AA gaagcccgtaccgtgagaactttttcag		0	0	0	CAATGCTT	0	8	8	C	8	9	1	TCGTGATACCCAGATCATATGAAACAGCATGACTTTTTCAAGAGTGCCATGCCCGAAG	9	67	58	G	67	68	1		68	68	0	AAGCATTG	68	76	8	AA	76	78	2
146	caatgcttctcgtgatacccagatcatatgaaacagcatgactttttcaagagtgccatgcccgaaggCACTCTTGAAAAAGTCG	2	caatgcttctcgtgatacccagatcatatgaaacagcat atgc gactttttcaagagtgcc c CTGAAAAAGTTCTCACggaagc G	CAATGCTTCTCGTGATACCCAGATCATATGAAACAGCAT	0	39	39	GACTTTTTCAAGAGTG	39	55	16	CC	55	57	2	ATGCCCGAA	57	66	9	GG	66	68	2		68	68	0	CACTCTTGAAAAAGTC	68	84	16	G	84	85	1
147	caatgcttctcgtgatacccagatcatatgaaacagcatgactttttcaagagtgccatgcccgaaggCCTGGCAC	2	caatgcttctcgtgatac atcatatgaaacagcatgacttt ccag t GGTCCggaagcccgtaccgtgagaact CAC	CAATGCTTCTCGTGATAC	0	18	18	CCAG	18	22	4		22	22	0	ATCATATGAAACAGCATGACTTTTTCAAGAGTGCCATGCCCGAAGG	22	68	46		68	68	0	C	68	69	1	CTGG	69	73	4	CAC	73	76	3
148	caatgcttctcgtgatacccagatcatatgaaacagcatgactttttcaagagtgccatgcccgaaggCATGGCACTC	2	caatgcttctcgtgatacccagatcatatgaaacagcatgactttttcaa c gagtgccatgcc g CTCACGGTACgg a a	CAATGCTTCTCGTGATACCCAGATCATATGAAACAGCATGACTTTTTCAA	0	50	50	GAGTGCCATG	50	60	10	CC	60	62	2	CGAA	62	66	4	GG	66	68	2		68	68	0	CATGGCACTC	68	78	10		78	78	0
149	caatgcttctcgtgatacccagatcatatgaaacagcatgactttttcaagagtgccatgcccgaaggGGCATGGCACAC	2	caatgcttctcgtgatacccagatcatatgaaacagcatgactttttcaaga g gtgccatgccc a CACGGTACGGg a CA g	CAATGCTTCTCGTGATACCCAGATCATATGAAACAGCATGACTTTTTCAAGA	0	52	52	GTGCCATGCC	52	62	10	C	62	63	1	GAAG	63	67	4	G	67	68	1		68	68	0	GGCATGGCAC	68	78	10	AC	78	80	2
150	caatgcttctcgtgatacccagatcatatgaaacagcatgactttttcaagagtgccatgcccgaaggGCATGGCACGC	2	caatgcttctcgtgatacccagatcatatgaaacagcatgactttttcaaga g gtgccatgccc a CACGGTACGgga CG	CAATGCTTCTCGTGATACCCAGATCATATGAAACAGCATGACTTTTTCAAGA	0	52	52	GTGCCATGC	52	61	9	CC	61	63	2	GAA	63	66	3	GG	66	68	2		68	68	0	GCATGGCAC	68	77	9	GC	77	79	2
151	caatgcttctcgtgatacccagatcatatgaaacagcatgactttttcaagagtgccatgcccgaaggGGCATGGCACTCTTGAAAG	2	caatgcttctcgtgatacccagatcatatgaaacagcatgactt g tttcaagagtgccatgccc a AAAGTTCTCACGGTACGGg a G g	CAATGCTTCTCGTGATACCCAGATCATATGAAACAGCATGACTT	0	44	44	TTTCAAGAGTGCCATGCC	44	62	18	C	62	63	1	GAAG	63	67	4	G	67	68	1		68	68	0	GGCATGGCACTCTTGAAA	68	86	18	G	86	87	1
152	caatgcttctcgtgatacccagatcatatgaaacagcatgactttttcaagagtgccatgcccgaaggGTATCACGAGAAGCAA	2	caa agatcatatgaaacagcatgac tgcttctcgtgataccc t ACGAAGAGCACTATGgg t A aagcccgtaccgtgagaacttt	CAA	0	3	3	TGCTTCTCGTGATAC	3	18	15	CC	18	20	2	AGATCATATGAAACAGCATGACTTTTTCAAGAGTGCCATGCCCGAA	20	66	46	GG	66	68	2		68	68	0	GTATCACGAGAAGCA	68	83	15	A	83	84	1
153	caatgcttctcgtgatacccagatcatatgaaacagcatgactttttcaagagtgccatgcccgaaggTATCACGAGAAGCATTGA	2	cagatcatatgaaacagcatgac caatgcttctcgtgatacc t GTTACGAAGAGCACTATggaagcccgtaccgtgagaactttt A		0	0	0	CAATGCTTCTCGTGATA	0	17	17	CC	17	19	2	CAGATCATATGAAACAGCATGACTTTTTCAAGAGTGCCATGCCCGAA	19	66	47	GG	66	68	2		68	68	0	TATCACGAGAAGCATTG	68	85	17	A	85	86	1
154	caatgcttctcgtgatacccagatcatatgaaacagcatgactttttcaagagtgccatgcccgaaggCACTCTTGAAAAAA	2	caatgcttctcgtgatacccagatcatatgaaacagcatgac atgc tttttcaagagtgcc c AAAAAGTTCTCACggaagc A	CAATGCTTCTCGTGATACCCAGATCATATGAAACAGCATGAC	0	42	42	TTTTTCAAGAGTG	42	55	13	CC	55	57	2	ATGCCCGAA	57	66	9	GG	66	68	2		68	68	0	CACTCTTGAAAAA	68	81	13	A	81	82	1
155	caatgcttctcgtgatacccagatcatatgaaacagcatgactttttcaagagtgccatgcccgaaggGAAGCAT	2	ca tcgtgatacccagatcatatgaaacagca atgcttc t TACGAAGggaagcccgtaccgtgagaactttttcag	CA	0	2	2	ATGCTTC	2	9	7		9	9	0	TCGTGATACCCAGATCATATGAAACAGCATGACTTTTTCAAGAGTGCCATGCCCGAAGG	9	68	59		68	68	0		68	68	0	GAAGCAT	68	75	7		75	75	0
156	caatgcttctcgtgatacccagatcatatgaaacagcatgactttttcaagagtgccatgcccgaaggCCTGGCACTCTTGAAAA	2	caatgcttctcgtgatacccagatcatatgaaacagcatgact tgccc ttttcaagagtgcca g AAAAGTTCTCACGGT a CCgga	CAATGCTTCTCGTGATACCCAGATCATATGAAACAGCATGACT	0	43	43	TTTTCAAGAGTGCCA	43	58	15		58	58	0	TGCCCGAAGG	58	68	10		68	68	0	CC	68	70	2	TGGCACTCTTGAAAA	70	85	15		85	85	0
157	caatgcttctcgtgatacccagatcatatgaaacagcatgactttttcaagagtgccatgcccgaaggCCATGCTGTTTCATATGATCTGGGTATC	2	caatgcttctcgt actttttcaagagt gatacccagatcatatgaaacagcatg g CTATGGGTCTAGTATACTTTGTCGTACCggaagcccgtacc	CAATGCTTCTCGT	0	13	13	GATACCCAGATCATATGAAACAGCATG	13	40	27		40	40	0	ACTTTTTCAAGAGTGCCATGCCCGAAGG	40	68	28		68	68	0	C	68	69	1	CATGCTGTTTCATATGATCTGGGTATC	69	96	27		96	96	0
158	caatgcttctcgtgatacccagatcatatgaaacagcatgactttttcaagagtgccatgcccgaaggGGCATGGCACTCTTGAAAAAGT	2	caatgcttctcgtgatacccagatcatatgaaacagcatg g actttttcaagagtgccatgccc a TGAAAAAGTTCTCACGGTACGGg a g	CAATGCTTCTCGTGATACCCAGATCATATGAAACAGCATG	0	40	40	ACTTTTTCAAGAGTGCCATGCC	40	62	22	C	62	63	1	GAAG	63	67	4	G	67	68	1		68	68	0	GGCATGGCACTCTTGAAAAAGT	68	90	22		90	90	0
159	caatgcttctcgtgatacccagatcatatgaaacagcatgactttttcaagagtgccatgcccgaaggGCATGGCACTCTTGGAAAAGTCATGCT	2	caatgcttctcgtgatacccagatcatatgaaacagcatgacttttt g caagagtgccatgccc a GTTCTCACGGTACGgga TCGTACTGAAAAG	CAATGCTTCTCGTGATACCCAGATCATATGAAACAGCATGACTTTTT	0	47	47	CAAGAGTGCCATGC	47	61	14	CC	61	63	2	GAA	63	66	3	GG	66	68	2		68	68	0	GCATGGCACTCTTG	68	82	14	GAAAAGTCATGCT	82	95	13
160	caatgcttctcgtgatacccagatcatatgaaacagcatgactttttcaagagtgccatgcccgaaggGCATGGCACTCTA	2	caatgcttctcgtgatacccagatcatatgaaacagcatgactttttca g agagtgccatgccc a TCTCACGGTACGgga A	CAATGCTTCTCGTGATACCCAGATCATATGAAACAGCATGACTTTTTCA	0	49	49	AGAGTGCCATGC	49	61	12	CC	61	63	2	GAA	63	66	3	GG	66	68	2		68	68	0	GCATGGCACTCT	68	80	12	A	80	81	1
161	caatgcttctcgtgatacccagatcatatgaaacagcatgactttttcaagagtgccatgcccgaaggCCCAATGC	2	caatgcttctcgtgatacccagatcatatgaaacagcatgactttttcaagagtgccatgcccgaag g C CGTAACC	CAATGCTTCTCGTGATACCCAGATCATATGAAACAGCATGACTTTTTCAAGAGTGCCATGCCCGAAGG	0	68	68		68	68	0		68	68	0		68	68	0		68	68	0		76	76	0		76	76	0		76	76	0
162	caatgcttctcgtgatacccagatcatatgaaacagcatgactttttcaagagtgccatgcccgaaggGACTCTTGAAAAAGTCAT	2	caatgcttctcgtgatacccagatcatatgaaacagc gccatgc atgactttttcaagagt c TACTGAAAAAGTTCTCAGggaagc	CAATGCTTCTCGTGATACCCAGATCATATGAAACAGC	0	37	37	ATGACTTTTTCAAGAGT	37	54	17		54	54	0	GCCATGCCCGAAGG	54	68	14		68	68	0	G	68	69	1	ACTCTTGAAAAAGTCAT	69	86	17		86	86	0
163	caatgcttctcgtgatacccagatcatatgaaacagcatgactttttcaagagtgccatgcccgaaggGGCATGGCACTCTC	2	caatgcttctcgtgatacccagatcatatgaaacagcatgactttttca g agagtgccatgccc a TCTCACGGTACGGg a C g	CAATGCTTCTCGTGATACCCAGATCATATGAAACAGCATGACTTTTTCA	0	49	49	AGAGTGCCATGCC	49	62	13	C	62	63	1	GAAG	63	67	4	G	67	68	1		68	68	0	GGCATGGCACTCT	68	81	13	C	81	82	1
164	caatgcttctcgtgatacccagatcatatgaaacagcatgactttttcaagagtgccatgcccgaaggGGCATGGCACTCTTGA	2	caatgcttctcgtgatacccagatcatatgaaacagcatgactttt g tcaagagtgccatgccc a AGTTCTCACGGTACGGg a g	CAATGCTTCTCGTGATACCCAGATCATATGAAACAGCATGACTTTT	0	46	46	TCAAGAGTGCCATGCC	46	62	16	C	62	63	1	GAAG	63	67	4	G	67	68	1		68	68	0	GGCATGGCACTCTTGA	68	84	16		84	84	0
165	caatgcttctcgtgatacccagatcatatgaaacagcatgactttttcaagagtgccatgcccgaaggCCCTCTTGAAAAAGTCAT	2	caatgcttctcgtgatacccagatcatatgaaacagc tgccatgc atgactttttcaagag c TACTGAAAAAGTTCTCCCggaagc	CAATGCTTCTCGTGATACCCAGATCATATGAAACAGC	0	37	37	ATGACTTTTTCAAGAG	37	53	16		53	53	0	TGCCATGCCCGAAGG	53	68	15		68	68	0	CC	68	70	2	CTCTTGAAAAAGTCAT	70	86	16		86	86	0
166	caatgcttctcgtgatacccagatcatatgaaacagcatgactttttcaagagtgccatgcccgaaggGCATGGC	2	caatgcttctcgtgatacccagatcatatgaaacagcatgactttttcaagagt g gccatgccc a CGGTACGgga	CAATGCTTCTCGTGATACCCAGATCATATGAAACAGCATGACTTTTTCAAGAGT	0	54	54	GCCATGC	54	61	7	CC	61	63	2	GAA	63	66	3	GG	66	68	2		68	68	0	GCATGGC	68	75	7		75	75	0
167	caatgcttctcgtgatacccagatcatatgaaacagcatgactttttcaagagtgccatgcccgaaggCACTCTTGAAAAGTCATGCTGTTTCAT	2	caatgcttctcgtgatacccagatcatatgaaacagcatgact atgc ttttcaagagtgcc c AAAAGTTCTCACggaagc TACTTTGTCGTACTG	CAATGCTTCTCGTGATACCCAGATCATATGAAACAGCATGACT	0	43	43	TTTTCAAGAGTG	43	55	12	CC	55	57	2	ATGCCCGAA	57	66	9	GG	66	68	2		68	68	0	CACTCTTGAAAA	68	80	12	GTCATGCTGTTTCAT	80	95	15
168	caatgcttctcgtgatacccagatcatatgaaacagcatgactttttcaagagtgccatgcccgaaggGGCATGGCACT	2	caatgcttctcgtgatacccagatcatatgaaacagcatgactttttcaag g agtgccatgccc a TCACGGTACGGg a g	CAATGCTTCTCGTGATACCCAGATCATATGAAACAGCATGACTTTTTCAAG	0	51	51	AGTGCCATGCC	51	62	11	C	62	63	1	GAAG	63	67	4	G	67	68	1		68	68	0	GGCATGGCACT	68	79	11		79	79	0
169	caatgcttctcgtgatacccagatcatatgaaacagcatgactttttcaagagtgccatgcccgaaggCAATGCT	2	caatgcttctcgtgatacccagatcatatgaaacagcatgactttttcaagagtgcca c tgcc g ACgg a TCGTA a	CAATGCTTCTCGTGATACCCAGATCATATGAAACAGCATGACTTTTTCAAGAGTGCCA	0	58	58	TG	58	60	2	CC	60	62	2	CGAA	62	66	4	GG	66	68	2		68	68	0	CA	68	70	2	ATGCT	70	75	5
170	caatgcttctcgtgatacccagatcatatgaaacagcatgactttttcaagagtgccatgcccgaaggGAA	2	caatgcttctcgtgatacccagatcatatgaaacagcatgacttt aagagtgcc ttc a AAG t ggaagcccg	CAATGCTTCTCGTGATACCCAGATCATATGAAACAGCATGACTTT	0	45	45	TTC	45	48	3		48	48	0	AAGAGTGCCATGCCCGAAGG	48	68	20		68	68	0		68	68	0	GAA	68	71	3		71	71	0
171	caatgcttctcgtgatacccagatcatatgaaacagcatgactttttcaagagtgccatgcccgaaggGCATGGCACTCTTGAAAAAGC	2	caatgcttctcgtgatacccagatcatatgaaacagcatga g ctttttcaagagtgccatgccc a GAAAAAGTTCTCACGGTACGgga C	CAATGCTTCTCGTGATACCCAGATCATATGAAACAGCATGA	0	41	41	CTTTTTCAAGAGTGCCATGC	41	61	20	CC	61	63	2	GAA	63	66	3	GG	66	68	2		68	68	0	GCATGGCACTCTTGAAAAAG	68	88	20	C	88	89	1
172	caatgcttctcgtgatacccagatcatatgaaacagcatgactttttcaagagtgccatgcccgaaggGCATGGCACTCTTGAAAAAGAC	2	caatgcttctcgtgatacccagatcatatgaaacagcatga g ctttttcaagagtgccatgccc a GAAAAAGTTCTCACGGTACGgga CA	CAATGCTTCTCGTGATACCCAGATCATATGAAACAGCATGA	0	41	41	CTTTTTCAAGAGTGCCATGC	41	61	20	CC	61	63	2	GAA	63	66	3	GG	66	68	2		68	68	0	GCATGGCACTCTTGAAAAAG	68	88	20	AC	88	90	2
173	caatgcttctcgtgatacccagatcatatgaaacagcatgactttttcaagagtgccatgcccgaaggTCATGCTGTTTCATGACCTTCGGGCAT	2	caatgcttctcgtgatacccagatcat tttttcaagagt atgaaacagcatgac g TACTTTGTCGTACTggaagcccgtacc TACGGGCTTCCAG	CAATGCTTCTCGTGATACCCAGATCAT	0	27	27	ATGAAACAGCATGA	27	41	14	C	41	42	1	TTTTTCAAGAGTGCCATGCCCGAAG	42	67	25	G	67	68	1		68	68	0	TCATGCTGTTTCAT	68	82	14	GACCTTCGGGCAT	82	95	13
174	caatgcttctcgtgatacccagatcatatgaaacagcatgactttttcaagagtgccatgcccgaaggGG	2	caatgcttctcgtgatacccagatcatatgaaacagcatgactttttcaagagtgccatg g ccc a GGg a g	CAATGCTTCTCGTGATACCCAGATCATATGAAACAGCATGACTTTTTCAAGAGTGCCATG	0	60	60	CC	60	62	2	C	62	63	1	GAAG	63	67	4	G	67	68	1		68	68	0	GG	68	70	2		70	70	0
175	caatgcttctcgtgatacccagatcatatgaaacagcatgactttttcaagagtgccatgcccgaaggGCATGGA	2	caatgcttctcgtgatacccagatcatatgaaacagcatgactttttcaagagtg g ccatgccc a GGTACGgga A	CAATGCTTCTCGTGATACCCAGATCATATGAAACAGCATGACTTTTTCAAGAGTG	0	55	55	CCATGC	55	61	6	CC	61	63	2	GAA	63	66	3	GG	66	68	2		68	68	0	GCATGG	68	74	6	A	74	75	1
176	caatgcttctcgtgatacccagatcatatgaaacagcatgactttttcaagagtgccatgcccgaaggGTATCACGAGAAGCATA	2	ca agatcatatgaaacagcatgac atgcttctcgtgataccc t TACGAAGAGCACTATGgg t A aagcccgtaccgtgagaacttt	CA	0	2	2	ATGCTTCTCGTGATAC	2	18	16	CC	18	20	2	AGATCATATGAAACAGCATGACTTTTTCAAGAGTGCCATGCCCGAA	20	66	46	GG	66	68	2		68	68	0	GTATCACGAGAAGCAT	68	84	16	A	84	85	1
177	caatgcttctcgtgatacccagatcatatgaaacagcatgactttttcaagagtgccatgcccgaaggCATTGAAT	2	ttctcgtgatacccagatcatatgaaacag caatgc c GTTACggaagcccgtaccgtgagaactttttcagta TAA		0	0	0	CAATG	0	5	5	C	5	6	1	TTCTCGTGATACCCAGATCATATGAAACAGCATGACTTTTTCAAGAGTGCCATGCCCGAAG	6	67	61	G	67	68	1		68	68	0	CATTG	68	73	5	AAT	73	76	3
178	caatgcttctcgtgatacccagatcatatgaaacagcatgactttttcaagagtgccatgcccgaaggGAT	2	caatgcttctcgtgatacccagatcatatgaaacagcatgactttttcaagagtgcc gccc at g TA a Ggga	CAATGCTTCTCGTGATACCCAGATCATATGAAACAGCATGACTTTTTCAAGAGTGCC	0	57	57	AT	57	59	2		59	59	0	GCCCGAAGG	59	68	9		68	68	0	G	68	69	1	AT	69	71	2		71	71	0
179	caatgcttctcgtgatacccagatcatatgaaacagcatgactttttcaagagtgccatgcccgaaggTCATGCTGTTTCATATGAA	2	caatgcttctcgtgatacccaga tttttcaagagt tcatatgaaacagcatgac g AGTATACTTTGTCGTACTggaagcccgtacc A	CAATGCTTCTCGTGATACCCAGA	0	23	23	TCATATGAAACAGCATGA	23	41	18	C	41	42	1	TTTTTCAAGAGTGCCATGCCCGAAG	42	67	25	G	67	68	1		68	68	0	TCATGCTGTTTCATATGA	68	86	18	A	86	87	1
180	caatgcttctcgtgatacccagatcatatgaaacagcatgactttttcaagagtgccatgcccgaaggGCATGGCACTCTTGAGA	2	caatgcttctcgtgatacccagatcatatgaaacagcatgactttt g tcaagagtgccatgccc a AGTTCTCACGGTACGgga AG	CAATGCTTCTCGTGATACCCAGATCATATGAAACAGCATGACTTTT	0	46	46	TCAAGAGTGCCATGC	46	61	15	CC	61	63	2	GAA	63	66	3	GG	66	68	2		68	68	0	GCATGGCACTCTTGA	68	83	15	GA	83	85	2
181	caatgcttctcgtgatacccagatcatatgaaacagcatgactttttcaagagtgccatgcccgaaggGCATGGCACTGA	2	caatgcttctcgtgatacccagatcatatgaaacagcatgactttttcaag g agtgccatgccc a TCACGGTACGgga AG	CAATGCTTCTCGTGATACCCAGATCATATGAAACAGCATGACTTTTTCAAG	0	51	51	AGTGCCATGC	51	61	10	CC	61	63	2	GAA	63	66	3	GG	66	68	2		68	68	0	GCATGGCACT	68	78	10	GA	78	80	2
182	caatgcttctcgtgatacccagatcatatgaaacagcatgactttttcaagagtgccatgcccgaaggGTATCACGAGAAGCATTGCA	2	agatcatatgaaacagcatgac caatgcttctcgtgataccc t GTTACGAAGAGCACTATGgg t AC aagcccgtaccgtgagaacttt		0	0	0	CAATGCTTCTCGTGATAC	0	18	18	CC	18	20	2	AGATCATATGAAACAGCATGACTTTTTCAAGAGTGCCATGCCCGAA	20	66	46	GG	66	68	2		68	68	0	GTATCACGAGAAGCATTG	68	86	18	CA	86	88	2
183	caatgcttctcgtgatacccagatcatatgaaacagcatgactttttcaagagtgccatgcccgaaggCCA	2	caatgcttctcgtgatacccagatcatatgaaacagcatgactttttcaagagtgcca c tg-cc g ACCgg a a	CAATGCTTCTCGTGATACCCAGATCATATGAAACAGCATGACTTTTTCAAGAGTGCCA	0	58	58	TG	58	60	2	CC	60	62	2	CGAA	62	66	4	GG	66	68	2	C	68	69	1	CA	69	71	2		71	71	0
184	caatgcttctcgtgatacccagatcatatgaaacagcatgactttttcaagagtgccatgcccgaaggCCTCTTGAAAAAGTCATGCTGT	2	caatgcttctcgtgatacccagatcatatgaa tgccatg acagcatgactttttcaagag c TGTCGTACTGAAAAAGTTCTC c Cggaagc	CAATGCTTCTCGTGATACCCAGATCATATGAA	0	32	32	ACAGCATGACTTTTTCAAGAG	32	53	21		53	53	0	TGCCATGCCCGAAGG	53	68	15		68	68	0	C	68	69	1	CTCTTGAAAAAGTCATGCTGT	69	90	21		90	90	0
185	caatgcttctcgtgatacccagatcatatgaaacagcatgactttttcaagagtgccatgcccgaaggTCATGCTGTTTCATT	2	caatgcttctcgtgatacccagatcat tttttcaagagt atgaaacagcatgac g TACTTTGTCGTACTggaagcccgtacc T	CAATGCTTCTCGTGATACCCAGATCAT	0	27	27	ATGAAACAGCATGA	27	41	14	C	41	42	1	TTTTTCAAGAGTGCCATGCCCGAAG	42	67	25	G	67	68	1		68	68	0	TCATGCTGTTTCAT	68	82	14	T	82	83	1
186	caatgcttctcgtgatacccagatcatatgaaacagcatgactttttcaagagtgccatgcccgaaggCCACTCTTGAAAAAGTCAT	2	caatgcttctcgtgatacccagatcatatgaaacagc atgc atgactttttcaagagtg-cc c TACTGAAAAAGTTCTCACCggaagc	CAATGCTTCTCGTGATACCCAGATCATATGAAACAGC	0	37	37	ATGACTTTTTCAAGAGTG	37	55	18	CC	55	57	2	ATGCCCGAA	57	66	9	GG	66	68	2	C	68	69	1	CACTCTTGAAAAAGTCAT	69	87	18		87	87	0
187	caatgcttctcgtgatacccagatcatatgaaacagcatgactttttcaagagtgccatgcccgaaggGCATGGCACTA	2	caatgcttctcgtgatacccagatcatatgaaacagcatgactttttcaag g agtgccatgccc a TCACGGTACGgga A	CAATGCTTCTCGTGATACCCAGATCATATGAAACAGCATGACTTTTTCAAG	0	51	51	AGTGCCATGC	51	61	10	CC	61	63	2	GAA	63	66	3	GG	66	68	2		68	68	0	GCATGGCACT	68	78	10	A	78	79	1
188	caatgcttctcgtgatacccagatcatatgaaacagcatgactttttcaagagtgccatgcccgaaggGCATGGCACTCTTGA	2	caatgcttctcgtgatacccagatcatatgaaacagcatgactttt g tcaagagtgccatgccc a AGTTCTCACGGTACGgga	CAATGCTTCTCGTGATACCCAGATCATATGAAACAGCATGACTTTT	0	46	46	TCAAGAGTGCCATGC	46	61	15	CC	61	63	2	GAA	63	66	3	GG	66	68	2		68	68	0	GCATGGCACTCTTGA	68	83	15		83	83	0
189	caatgcttctcgtgatacccagatcatatgaaacagcatgactttttcaagagtgccatgcccgaaggTCATGCTGTTT	2	caatgcttctcgtgatacccagatcatatg tttttcaagagt aaacagcatgac g TTTGTCGTACTggaagcccgtacc	CAATGCTTCTCGTGATACCCAGATCATATG	0	30	30	AAACAGCATGA	30	41	11	C	41	42	1	TTTTTCAAGAGTGCCATGCCCGAAG	42	67	25	G	67	68	1		68	68	0	TCATGCTGTTT	68	79	11		79	79	0
190	caatgcttctcgtgatacccagatcatatgaaacagcatgactttttcaagagtgccatgcccgaaggGCACTCTTGAAAAAGTCATGCTGT	2	caatgcttctcgtgatacccagatcatatgaa atgc acagcatgactttttcaagagtgcc c TGTCGTACTGAAAAAGTTCTCACGg c gaag	CAATGCTTCTCGTGATACCCAGATCATATGAA	0	32	32	ACAGCATGACTTTTTCAAGAGTGC	32	56	24	C	56	57	1	ATGCCCGAAG	57	67	10	G	67	68	1		68	68	0	GCACTCTTGAAAAAGTCATGCTGT	68	92	24		92	92	0
191	caatgcttctcgtgatacccagatcatatgaaacagcatgactttttcaagagtgccatgcccgaaggGCACTCTTGAAAAAGT	2	caatgcttctcgtgatacccagatcatatgaaacagcatg atgc actttttcaagagtgcc c TGAAAAAGTTCTCACGg c gaag	CAATGCTTCTCGTGATACCCAGATCATATGAAACAGCATG	0	40	40	ACTTTTTCAAGAGTGC	40	56	16	C	56	57	1	ATGCCCGAAG	57	67	10	G	67	68	1		68	68	0	GCACTCTTGAAAAAGT	68	84	16		84	84	0
192	caatgcttctcgtgatacccagatcatatgaaacagcatgactttttcaagagtgccatgcccgaaggCCCGAAGA	2	caatgcttctcgtgatacccagatcatatgaaacagcatgactttttcaagagtgccatgcccgaag g C AGAAGCC	CAATGCTTCTCGTGATACCCAGATCATATGAAACAGCATGACTTTTTCAAGAGTGCCATGCCCGAAGG	0	68	68		68	68	0		68	68	0		68	68	0		68	68	0		76	76	0		76	76	0		76	76	0
193	caatgcttctcgtgatacccagatcatatgaaacagcatgactttttcaagagtgccatgcccgaaggCCATGCTGT	2	caatgcttctcgtgatacccagatcatatgaa actttttcaagagt acagcatg g TGTCGTACCggaagcccgtacc	CAATGCTTCTCGTGATACCCAGATCATATGAA	0	32	32	ACAGCATG	32	40	8		40	40	0	ACTTTTTCAAGAGTGCCATGCCCGAAGG	40	68	28		68	68	0	C	68	69	1	CATGCTGT	69	77	8		77	77	0
194	caatgcttctcgtgatacccagatcatatgaaacagcatgactttttcaagagtgccatgcccgaaggGTATCACGAGAAGCA	2	caa agatcatatgaaacagcatgac tgcttctcgtgataccc t ACGAAGAGCACTATGgg t aagcccgtaccgtgagaacttt	CAA	0	3	3	TGCTTCTCGTGATAC	3	18	15	CC	18	20	2	AGATCATATGAAACAGCATGACTTTTTCAAGAGTGCCATGCCCGAA	20	66	46	GG	66	68	2		68	68	0	GTATCACGAGAAGCA	68	83	15		83	83	0
195	caatgcttctcgtgatacccagatcatatgaaacagcatgactttttcaagagtgccatgcccgaaggTCATGCTGTTTCATAG	2	caatgcttctcgtgatacccagatca tttttcaagagt tatgaaacagcatgac g ATACTTTGTCGTACTggaagcccgtacc G	CAATGCTTCTCGTGATACCCAGATCA	0	26	26	TATGAAACAGCATGA	26	41	15	C	41	42	1	TTTTTCAAGAGTGCCATGCCCGAAG	42	67	25	G	67	68	1		68	68	0	TCATGCTGTTTCATA	68	83	15	G	83	84	1
196	caatgcttctcgtgatacccagatcatatgaaacagcatgactttttcaagagtgccatgcccgaaggGCAAA	2	caatgcttctcgtgatacccagatcatatgaaacagcatgactttttcaagagtgcca g tgccc a ACGgga AA	CAATGCTTCTCGTGATACCCAGATCATATGAAACAGCATGACTTTTTCAAGAGTGCCA	0	58	58	TGC	58	61	3	CC	61	63	2	GAA	63	66	3	GG	66	68	2		68	68	0	GCA	68	71	3	AA	71	73	2
197	caatgcttctcgtgatacccagatcatatgaaacagcatgactttttcaagagtgccatgcccgaaggCCTGGCACTCTTGAAAAAGTCATGCTGT	2	caatgcttctcgtgatacccagatcatatgaa tgccc acagcatgactttttcaagagtgcca g TGTCGTACTGAAAAAGTTCTCACGGT a CCgga	CAATGCTTCTCGTGATACCCAGATCATATGAA	0	32	32	ACAGCATGACTTTTTCAAGAGTGCCA	32	58	26		58	58	0	TGCCCGAAGG	58	68	10		68	68	0	CC	68	70	2	TGGCACTCTTGAAAAAGTCATGCTGT	70	96	26		96	96	0
198	caatgcttctcgtgatacccagatcatatgaaacagcatgactttttcaagagtgccatgcccgaaggTCATGCTGTTTCATATAT	2	caatgcttctcgtgatacccagatc tttttcaagagt atatgaaacagcatgac g TATACTTTGTCGTACTggaagcccgtacc TA	CAATGCTTCTCGTGATACCCAGATC	0	25	25	ATATGAAACAGCATGA	25	41	16	C	41	42	1	TTTTTCAAGAGTGCCATGCCCGAAG	42	67	25	G	67	68	1		68	68	0	TCATGCTGTTTCATAT	68	84	16	AT	84	86	2
199	caatgcttctcgtgatacccagatcatatgaaacagcatgactttttcaagagtgccatgcccgaaggGGCATGGCACTCTTGAG	2	caatgcttctcgtgatacccagatcatatgaaacagcatgactttt g tcaagagtgccatgccc a AGTTCTCACGGTACGGg a G g	CAATGCTTCTCGTGATACCCAGATCATATGAAACAGCATGACTTTT	0	46	46	TCAAGAGTGCCATGCC	46	62	16	C	62	63	1	GAAG	63	67	4	G	67	68	1		68	68	0	GGCATGGCACTCTTGA	68	84	16	G	84	85	1
200	caatgcttctcgtgatacccagatcatatgaaacagcatgactttttcaagagtgccatgcccgaaggCCATGCTGTTTCATA	2	caatgcttctcgtgatacccagatca actttttcaagagt tatgaaacagcatg g ATACTTTGTCGTACCggaagcccgtacc	CAATGCTTCTCGTGATACCCAGATCA	0	26	26	TATGAAACAGCATG	26	40	14		40	40	0	ACTTTTTCAAGAGTGCCATGCCCGAAGG	40	68	28		68	68	0	C	68	69	1	CATGCTGTTTCATA	69	83	14		83	83	0
201	caatgcttctcgtgatacccagatcatatgaaacagcatgactttttcaagagtgccatgcccgaaggCACTCTTGAAAGTCATGCTGT	2	caatgcttctcgtgatacccagatcatatgaaacagcatgactt atgc tttcaagagtgcc c AAAGTTCTCACggaagc TGTCGTACTG	CAATGCTTCTCGTGATACCCAGATCATATGAAACAGCATGACTT	0	44	44	TTTCAAGAGTG	44	55	11	CC	55	57	2	ATGCCCGAA	57	66	9	GG	66	68	2		68	68	0	CACTCTTGAAA	68	79	11	GTCATGCTGT	79	89	10
202	caatgcttctcgtgatacccagatcatatgaaacagcatgactttttcaagagtgccatgcccgaaggGCAGA	2	caatgcttctcgtgatacccagatcatatgaaacagcatgactttttcaagagtgcca g tgccc a ACGgga AG	CAATGCTTCTCGTGATACCCAGATCATATGAAACAGCATGACTTTTTCAAGAGTGCCA	0	58	58	TGC	58	61	3	CC	61	63	2	GAA	63	66	3	GG	66	68	2		68	68	0	GCA	68	71	3	GA	71	73	2
203	caatgcttctcgtgatacccagatcatatgaaacagcatgactttttcaagagtgccatgcccgaaggGGCACTCTTGAAAAAGTC	2	caatgcttctcgtgatacccagatcatatgaaacagcat atgcc gactttttcaagagtgcc c CTGAAAAAGTTCTCACGGggaag	CAATGCTTCTCGTGATACCCAGATCATATGAAACAGCAT	0	39	39	GACTTTTTCAAGAGTGCC	39	57	18		57	57	0	ATGCCCGAAGG	57	68	11		68	68	0		68	68	0	GGCACTCTTGAAAAAGTC	68	86	18		86	86	0
204	caatgcttctcgtgatacccagatcatatgaaacagcatgactttttcaagagtgccatgcccgaaggCCATGGCACTCTTGAAAAAGTC	2	caatgcttctcgtgatacccagatcatatgaaacagcat c gactttttcaagagtgccatg-cc g CTGAAAAAGTTCTCACGGTACCgg a a	CAATGCTTCTCGTGATACCCAGATCATATGAAACAGCAT	0	39	39	GACTTTTTCAAGAGTGCCATG	39	60	21	CC	60	62	2	CGAA	62	66	4	GG	66	68	2	C	68	69	1	CATGGCACTCTTGAAAAAGTC	69	90	21		90	90	0
205	caatgcttctcgtgatacccagatcatatgaaacagcatgactttttcaagagtgccatgcccgaaggGTCATGCTGTTTCATG	2	caatgcttctcgtgatacccagatcat tttttcaagagt atgaaacagcatgac g TACTTTGTCGTACTG c G ggaagcccgtac	CAATGCTTCTCGTGATACCCAGATCAT	0	27	27	ATGAAACAGCATGAC	27	42	15		42	42	0	TTTTTCAAGAGTGCCATGCCCGAAGG	42	68	26		68	68	0		68	68	0	GTCATGCTGTTTCAT	68	83	15	G	83	84	1
206	caatgcttctcgtgatacccagatcatatgaaacagcatgactttttcaagagtgccatgcccgaaggTCATGCTGTTTCATATGATCTGGGTATCAC	2	caatgcttctc tttttcaagagt gtgatacccagatcatatgaaacagcatgac g CACTATGGGTCTAGTATACTTTGTCGTACTggaagcccgtacc	CAATGCTTCTC	0	11	11	GTGATACCCAGATCATATGAAACAGCATGA	11	41	30	C	41	42	1	TTTTTCAAGAGTGCCATGCCCGAAG	42	67	25	G	67	68	1		68	68	0	TCATGCTGTTTCATATGATCTGGGTATCAC	68	98	30		98	98	0
207	caatgcttctcgtgatacccagatcatatgaaacagcatgactttttcaagagtgccatgcccgaaggGGCATGGCACTCTTA	1	caatgcttctcgtgatacccagatcatatgaaacagcatgactttttc g aagagtgccatgccc a TTCTCACGGTACGGg a A g	CAATGCTTCTCGTGATACCCAGATCATATGAAACAGCATGACTTTTTC	0	48	48	AAGAGTGCCATGCC	48	62	14	C	62	63	1	GAAG	63	67	4	G	67	68	1		68	68	0	GGCATGGCACTCTT	68	82	14	A	82	83	1
208	caatgcttctcgtgatacccagatcatatgaaacagcatgactttttcaagagtgccatgcccgaaggGCAATTGAAAAAGTCATGCTGTTTCAT	1	caatgcttctcgtgatacccagatcat gagtgccatg atgaaacagcatgactttttcaa c TACTTTGTCGTACTGAAAAAGTT c AACGggaagc	CAATGCTTCTCGTGATACCCAGATCAT	0	27	27	ATGAAACAGCATGACTTTTTCAA	27	50	23		50	50	0	GAGTGCCATGCCCGAAGG	50	68	18		68	68	0	GCAA	68	72	4	TTGAAAAAGTCATGCTGTTTCAT	72	95	23		95	95	0
209	caatgcttctcgtgatacccagatcatatgaaacagcatgactttttcaagagtgccatgcccgaaggTCATGCTGTTTCATATGAAT	1	caatgcttctcgtgatacccaga tttttcaagagt tcatatgaaacagcatgac g AGTATACTTTGTCGTACTggaagcccgtacc TA	CAATGCTTCTCGTGATACCCAGA	0	23	23	TCATATGAAACAGCATGA	23	41	18	C	41	42	1	TTTTTCAAGAGTGCCATGCCCGAAG	42	67	25	G	67	68	1		68	68	0	TCATGCTGTTTCATATGA	68	86	18	AT	86	88	2
210	caatgcttctcgtgatacccagatcatatgaaacagcatgactttttcaagagtgccatgcccgaaggGCATGGCACTCTTGAAAAAGTCATGC	1	caatgcttctcgtgatacccagatcatatgaaaca g gcatgactttttcaagagtgccatgccc a CGTACTGAAAAAGTTCTCACGGTACGgga	CAATGCTTCTCGTGATACCCAGATCATATGAAACA	0	35	35	GCATGACTTTTTCAAGAGTGCCATGC	35	61	26	CC	61	63	2	GAA	63	66	3	GG	66	68	2		68	68	0	GCATGGCACTCTTGAAAAAGTCATGC	68	94	26		94	94	0
211	caatgcttctcgtgatacccagatcatatgaaacagcatgactttttcaagagtgccatgcccgaaggTCGTGATACCCAGATCATGCTGTTTCATATGATCTGGGTATCACGAGAAGCAA	1	caa tttttcaagagt tgcttctcgtgatacccagatcatatgaaacagcatga--------------c g ACGAAGAGCACTATGGGTCTAGTATACTTTGTCGTACTAGACCCATAGTGCTggaagcccgtacc A	CAA	0	3	3	TGCTTCTCGTGATACCCAGATCATATGAAACAGCATGA	3	41	38	C	41	42	1	TTTTTCAAGAGTGCCATGCCCGAAG	42	67	25	G	67	68	1	TCGTGATACCCAGA	68	82	14	TCATGCTGTTTCATATGATCTGGGTATCACGAGAAGCA	82	120	38	A	120	121	1
212	caatgcttctcgtgatacccagatcatatgaaacagcatgactttttcaagagtgccatgcccgaaggGCATGGCACTCTTGAAAGTCATGCTGT	1	caatgcttctcgtgatacccagatcatatgaaacagcatgactt g tttcaagagtgccatgccc a AAAGTTCTCACGGTACGgga TGTCGTACTG	CAATGCTTCTCGTGATACCCAGATCATATGAAACAGCATGACTT	0	44	44	TTTCAAGAGTGCCATGC	44	61	17	CC	61	63	2	GAA	63	66	3	GG	66	68	2		68	68	0	GCATGGCACTCTTGAAA	68	85	17	GTCATGCTGT	85	95	10
213	caatgcttctcgtgatacccagatcatatgaaacagcatgactttttcaagagtgccatgcccgaaggCATGGCACTCTTGACAAA	1	caatgcttctcgtgatacccagatcatatgaaacagcatgactttt c tcaagagtgccatgcc g AGTTCTCACGGTACgg a AAAC a	CAATGCTTCTCGTGATACCCAGATCATATGAAACAGCATGACTTTT	0	46	46	TCAAGAGTGCCATG	46	60	14	CC	60	62	2	CGAA	62	66	4	GG	66	68	2		68	68	0	CATGGCACTCTTGA	68	82	14	CAAA	82	86	4
214	caatgcttctcgtgatacccagatcatatgaaacagcatgactttttcaagagtgccatgcccgaaggGTATCACGAGAAGCATCGG	1	ca agatcatatgaaacagcatgac atgcttctcgtgataccc t TACGAAGAGCACTATGgg t GGC aagcccgtaccgtgagaacttt	CA	0	2	2	ATGCTTCTCGTGATAC	2	18	16	CC	18	20	2	AGATCATATGAAACAGCATGACTTTTTCAAGAGTGCCATGCCCGAA	20	66	46	GG	66	68	2		68	68	0	GTATCACGAGAAGCAT	68	84	16	CGG	84	87	3
215	caatgcttctcgtgatacccagatcatatgaaacagcatgactttttcaagagtgccatgcccgaaggTCATGCTGTTTCATAGA	1	caatgcttctcgtgatacccagatca tttttcaagagt tatgaaacagcatgac g ATACTTTGTCGTACTggaagcccgtacc AG	CAATGCTTCTCGTGATACCCAGATCA	0	26	26	TATGAAACAGCATGA	26	41	15	C	41	42	1	TTTTTCAAGAGTGCCATGCCCGAAG	42	67	25	G	67	68	1		68	68	0	TCATGCTGTTTCATA	68	83	15	GA	83	85	2
216	caatgcttctcgtgatacccagatcatatgaaacagcatgactttttcaagagtgccatgcccgaaggTCATGCTGTTTCATATGAATCT	1	caatgcttctcgtgatacccaga tttttcaagagt tcatatgaaacagcatgac g AGTATACTTTGTCGTACTggaagcccgtacc TCTA	CAATGCTTCTCGTGATACCCAGA	0	23	23	TCATATGAAACAGCATGA	23	41	18	C	41	42	1	TTTTTCAAGAGTGCCATGCCCGAAG	42	67	25	G	67	68	1		68	68	0	TCATGCTGTTTCATATGA	68	86	18	ATCT	86	90	4
217	caatgcttctcgtgatacccagatcatatgaaacagcatgactttttcaagagtgccatgcccgaaggCAATGCTTCTCGTGAA	1	caatgcttctcgtgatacccagatcatatgaaacagcatgactttttcaagagtgcca c tgcc g ACgg a AAGTGCTCTTCGTA a	CAATGCTTCTCGTGATACCCAGATCATATGAAACAGCATGACTTTTTCAAGAGTGCCA	0	58	58	TG	58	60	2	CC	60	62	2	CGAA	62	66	4	GG	66	68	2		68	68	0	CA	68	70	2	ATGCTTCTCGTGAA	70	84	14
218	caatgcttctcgtgatacccagatcatatgaaacagcatgactttttcaagagtgccatgcccgaaggGTCATGCTGTTTCATGT	1	caatgcttctcgtgatacccagatcat tttttcaagagt atgaaacagcatgac g TACTTTGTCGTACTG c TG ggaagcccgtac	CAATGCTTCTCGTGATACCCAGATCAT	0	27	27	ATGAAACAGCATGAC	27	42	15		42	42	0	TTTTTCAAGAGTGCCATGCCCGAAGG	42	68	26		68	68	0		68	68	0	GTCATGCTGTTTCAT	68	83	15	GT	83	85	2
219	caatgcttctcgtgatacccagatcatatgaaacagcatgactttttcaagagtgccatgcccgaaggGTCATGGCAT	1	caatgcttctcgtgatacccagatcatatgaaacag tttttcaagagt catgac g GTACTG c TACG ggaagcccgtac	CAATGCTTCTCGTGATACCCAGATCATATGAAACAG	0	36	36	CATGAC	36	42	6		42	42	0	TTTTTCAAGAGTGCCATGCCCGAAGG	42	68	26		68	68	0		68	68	0	GTCATG	68	74	6	GCAT	74	78	4
220	caatgcttctcgtgatacccagatcatatgaaacagcatgactttttcaagagtgccatgcccgaaggGCATGGCACTCTTGAAT	1	caatgcttctcgtgatacccagatcatatgaaacagcatgacttt g ttcaagagtgccatgccc a AAGTTCTCACGGTACGgga T	CAATGCTTCTCGTGATACCCAGATCATATGAAACAGCATGACTTT	0	45	45	TTCAAGAGTGCCATGC	45	61	16	CC	61	63	2	GAA	63	66	3	GG	66	68	2		68	68	0	GCATGGCACTCTTGAA	68	84	16	T	84	85	1
221	caatgcttctcgtgatacccagatcatatgaaacagcatgactttttcaagagtgccatgcccgaaggTCATGCTGTTTCATATGATCTGGGTAACAC	1	caatgcttctcgtga tttttcaagagt tacccagatcatatgaaacagcatgac g ATGGGTCTAGTATACTTTGTCGTACTggaagcccgtacc CACA	CAATGCTTCTCGTGA	0	15	15	TACCCAGATCATATGAAACAGCATGA	15	41	26	C	41	42	1	TTTTTCAAGAGTGCCATGCCCGAAG	42	67	25	G	67	68	1		68	68	0	TCATGCTGTTTCATATGATCTGGGTA	68	94	26	ACAC	94	98	4
222	caatgcttctcgtgatacccagatcatatgaaacagcatgactttttcaagagtgccatgcccgaaggGTATCACGAGAAGCATTGAT	1	agatcatatgaaacagcatgac caatgcttctcgtgataccc t GTTACGAAGAGCACTATGgg t TA aagcccgtaccgtgagaacttt		0	0	0	CAATGCTTCTCGTGATAC	0	18	18	CC	18	20	2	AGATCATATGAAACAGCATGACTTTTTCAAGAGTGCCATGCCCGAA	20	66	46	GG	66	68	2		68	68	0	GTATCACGAGAAGCATTG	68	86	18	AT	86	88	2
223	caatgcttctcgtgatacccagatcatatgaaacagcatgactttttcaagagtgccatgcccgaaggTCATGCTGTTTCAAG	1	caatgcttctcgtgatacccagatcata tttttcaagagt tgaaacagcatgac g ACTTTGTCGTACTggaagcccgtacc GA	CAATGCTTCTCGTGATACCCAGATCATA	0	28	28	TGAAACAGCATGA	28	41	13	C	41	42	1	TTTTTCAAGAGTGCCATGCCCGAAG	42	67	25	G	67	68	1		68	68	0	TCATGCTGTTTCA	68	81	13	AG	81	83	2
224	caatgcttctcgtgatacccagatcatatgaaacagcatgactttttcaagagtgccatgcccgaaggGCAATGCTTC	1	caatgcttctcgtgatacccagatcatatgaaacagcatgactttttcaagagtgcca g tgccc a ACGgga CTTCGTA	CAATGCTTCTCGTGATACCCAGATCATATGAAACAGCATGACTTTTTCAAGAGTGCCA	0	58	58	TGC	58	61	3	CC	61	63	2	GAA	63	66	3	GG	66	68	2		68	68	0	GCA	68	71	3	ATGCTTC	71	78	7
225	caatgcttctcgtgatacccagatcatatgaaacagcatgactttttcaagagtgccatgcccgaaggTCATGCTGTTTCATTA	1	caatgcttctcgtgatacccagatcat tttttcaagagt atgaaacagcatgac g TACTTTGTCGTACTggaagcccgtacc AT	CAATGCTTCTCGTGATACCCAGATCAT	0	27	27	ATGAAACAGCATGA	27	41	14	C	41	42	1	TTTTTCAAGAGTGCCATGCCCGAAG	42	67	25	G	67	68	1		68	68	0	TCATGCTGTTTCAT	68	82	14	TA	82	84	2
226	caatgcttctcgtgatacccagatcatatgaaacagcatgactttttcaagagtgccatgcccgaaggCCACA	1	caatgcttctcgtgatacccagatcatatgaaacagcatgactttttcaaga atgc gtg-cc c CACCggaagc A	CAATGCTTCTCGTGATACCCAGATCATATGAAACAGCATGACTTTTTCAAGA	0	52	52	GTG	52	55	3	CC	55	57	2	ATGCCCGAA	57	66	9	GG	66	68	2	C	68	69	1	CAC	69	72	3	A	72	73	1
227	caatgcttctcgtgatacccagatcatatgaaacagcatgactttttcaagagtgccatgcccgaaggATAC	1	caatgcttctcgtga cagatcatatgaaacagcatgac ta-cc t ATAggaagcccgtaccgtgagaactttt C	CAATGCTTCTCGTGA	0	15	15	TA	15	17	2	CC	17	19	2	CAGATCATATGAAACAGCATGACTTTTTCAAGAGTGCCATGCCCGAA	19	66	47	GG	66	68	2	A	68	69	1	TA	69	71	2	C	71	72	1
228	caatgcttctcgtgatacccagatcatatgaaacagcatgactttttcaagagtgccatgcccgaaggCCACTCTTGAACAAGTCATGCT	1	caatgcttctcgtgatacccagatcatatgaaacagcatgacttt atgc ttcaagagtg-cc c AAGTTCTCACCggaagc TCGTACTGAAC	CAATGCTTCTCGTGATACCCAGATCATATGAAACAGCATGACTTT	0	45	45	TTCAAGAGTG	45	55	10	CC	55	57	2	ATGCCCGAA	57	66	9	GG	66	68	2	C	68	69	1	CACTCTTGAA	69	79	10	CAAGTCATGCT	79	90	11
229	caatgcttctcgtgatacccagatcatatgaaacagcatgactttttcaagagtgccatgcccgaaggCACTCTTGAAAAC	1	caatgcttctcgtgatacccagatcatatgaaacagcatgact atgc ttttcaagagtgcc c AAAAGTTCTCACggaagc C	CAATGCTTCTCGTGATACCCAGATCATATGAAACAGCATGACT	0	43	43	TTTTCAAGAGTG	43	55	12	CC	55	57	2	ATGCCCGAA	57	66	9	GG	66	68	2		68	68	0	CACTCTTGAAAA	68	80	12	C	80	81	1
230	caatgcttctcgtgatacccagatcatatgaaacagcatgactttttcaagagtgccatgcccgaaggGGCATGGCACTCTTGAAAAAGTCATGCTGT	1	caatgcttctcgtgatacccagatcatatgaa g acagcatgactttttcaagagtgccatgccc a TGTCGTACTGAAAAAGTTCTCACGGTACGGg a g	CAATGCTTCTCGTGATACCCAGATCATATGAA	0	32	32	ACAGCATGACTTTTTCAAGAGTGCCATGCC	32	62	30	C	62	63	1	GAAG	63	67	4	G	67	68	1		68	68	0	GGCATGGCACTCTTGAAAAAGTCATGCTGT	68	98	30		98	98	0
231	caatgcttctcgtgatacccagatcatatgaaacagcatgactttttcaagagtgccatgcccgaaggGGCACGGCACTCT	1	caatgcttctcgtgatacccagatcatatgaaacagcatgactttttcaagagtgcca g tgccc a ACGGg a TCTCACGGC g	CAATGCTTCTCGTGATACCCAGATCATATGAAACAGCATGACTTTTTCAAGAGTGCCA	0	58	58	TGCC	58	62	4	C	62	63	1	GAAG	63	67	4	G	67	68	1		68	68	0	GGCA	68	72	4	CGGCACTCT	72	81	9
232	caatgcttctcgtgatacccagatcatatgaaacagcatgactttttcaagagtgccatgcccgaaggTCATGCTGTAACATATAAAA	1	caatgcttctcgtgatacccagatcatatgaa tttttcaagagt acagcatgac g TGTCGTACTggaagcccgtacc AAAATATACAA	CAATGCTTCTCGTGATACCCAGATCATATGAA	0	32	32	ACAGCATGA	32	41	9	C	41	42	1	TTTTTCAAGAGTGCCATGCCCGAAG	42	67	25	G	67	68	1		68	68	0	TCATGCTGT	68	77	9	AACATATAAAA	77	88	11
233	caatgcttctcgtgatacccagatcatatgaaacagcatgactttttcaagagtgccatgcccgaaggGGCTTGGCAC	1	caatgcttctcgtgatacccagatcatatgaaacagcatgactttttcaagagtgccat g gccc a CGGg a CACGGTT g	CAATGCTTCTCGTGATACCCAGATCATATGAAACAGCATGACTTTTTCAAGAGTGCCAT	0	59	59	GCC	59	62	3	C	62	63	1	GAAG	63	67	4	G	67	68	1		68	68	0	GGC	68	71	3	TTGGCAC	71	78	7
234	caatgcttctcgtgatacccagatcatatgaaacagcatgactttttcaagagtgccatgcccgaaggGCATGGCACTCTAGAAAAAGT	1	caatgcttctcgtgatacccagatcatatgaaacagcatgactttttca g agagtgccatgccc a TCTCACGGTACGgga TGAAAAAGA	CAATGCTTCTCGTGATACCCAGATCATATGAAACAGCATGACTTTTTCA	0	49	49	AGAGTGCCATGC	49	61	12	CC	61	63	2	GAA	63	66	3	GG	66	68	2		68	68	0	GCATGGCACTCT	68	80	12	AGAAAAAGT	80	89	9
235	caatgcttctcgtgatacccagatcatatgaaacagcatgactttttcaagagtgccatgcccgaaggCCCAATGCTTC	1	caatgcttctcgtgatacccagatcatatgaaacagcatgactttttcaagagtgccatgcccgaag g C CTTCGTAACC	CAATGCTTCTCGTGATACCCAGATCATATGAAACAGCATGACTTTTTCAAGAGTGCCATGCCCGAAGG	0	68	68		68	68	0		68	68	0		68	68	0		68	68	0		79	79	0		79	79	0		79	79	0
236	caatgcttctcgtgatacccagatcatatgaaacagcatgactttttcaagagtgccatgcccgaaggCCTCTTGAAAAAGTCT	1	caatgcttctcgtgatacccagatcatatgaaacagcat tgccatg gactttttcaagag c CTGAAAAAGTTCTC c T Cggaagc	CAATGCTTCTCGTGATACCCAGATCATATGAAACAGCAT	0	39	39	GACTTTTTCAAGAG	39	53	14		53	53	0	TGCCATGCCCGAAGG	53	68	15		68	68	0	C	68	69	1	CTCTTGAAAAAGTC	69	83	14	T	83	84	1
237	caatgcttctcgtgatacccagatcatatgaaacagcatgactttttcaagagtgccatgcccgaaggTCATCACGAG	1	caatgctt acccagatcatatgaaacagcatgac ctcgtgat t GAGCACTA t CTggaagcccgtaccgtgagaacttt	CAATGCTT	0	8	8	CTCGTGAT	8	16	8		16	16	0	ACCCAGATCATATGAAACAGCATGACTTTTTCAAGAGTGCCATGCCCGAAGG	16	68	52		68	68	0	TC	68	70	2	ATCACGAG	70	78	8		78	78	0
238	caatgcttctcgtgatacccagatcatatgaaacagcatgactttttcaagagtgccatgcccgaaggCATGGCACTCTA	1	caatgcttctcgtgatacccagatcatatgaaacagcatgactttttca c agagtgccatgcc g TCTCACGGTACgg a A a	CAATGCTTCTCGTGATACCCAGATCATATGAAACAGCATGACTTTTTCA	0	49	49	AGAGTGCCATG	49	60	11	CC	60	62	2	CGAA	62	66	4	GG	66	68	2		68	68	0	CATGGCACTCT	68	79	11	A	79	80	1
239	caatgcttctcgtgatacccagatcatatgaaacagcatgactttttcaagagtgccatgcccgaaggCACTCTGAAAAAGTCATGCTGT	1	caatgcttctcgtgatacccagatcatatgaa agagtgccatg acagcatgactttttca c TGTCGTACTGAAAAAGT c CTCACggaagc	CAATGCTTCTCGTGATACCCAGATCATATGAA	0	32	32	ACAGCATGACTTTTTCA	32	49	17		49	49	0	AGAGTGCCATGCCCGAAGG	49	68	19		68	68	0	CACTC	68	73	5	TGAAAAAGTCATGCTGT	73	90	17		90	90	0
240	caatgcttctcgtgatacccagatcatatgaaacagcatgactttttcaagagtgccatgcccgaaggCACTCTTGAAAAAGTCATCACGAGAAGCAT	1	caatgcttctcgtgatacccagatcatatgaaacagc atgc atgactttttcaagagtgcc c TACTGAAAAAGTTCTCACggaagc TACGAAGAGCAC	CAATGCTTCTCGTGATACCCAGATCATATGAAACAGC	0	37	37	ATGACTTTTTCAAGAGTG	37	55	18	CC	55	57	2	ATGCCCGAA	57	66	9	GG	66	68	2		68	68	0	CACTCTTGAAAAAGTCAT	68	86	18	CACGAGAAGCAT	86	98	12
241	caatgcttctcgtgatacccagatcatatgaaacagcatgactttttcaagagtgccatgcccgaaggCATTGAAAC	1	ttctcgtgatacccagatcatatgaaacag caatgc c GTTACggaagcccgtaccgtgagaactttttcagta CAAA		0	0	0	CAATG	0	5	5	C	5	6	1	TTCTCGTGATACCCAGATCATATGAAACAGCATGACTTTTTCAAGAGTGCCATGCCCGAAG	6	67	61	G	67	68	1		68	68	0	CATTG	68	73	5	AAAC	73	77	4
242	caatgcttctcgtgatacccagatcatatgaaacagcatgactttttcaagagtgccatgcccgaaggGTATCACGAGG	1	caatgctt agatcatatgaaacagcatgac ctcgtgataccc t GAGCACTATGgg t G aagcccgtaccgtgagaacttt	CAATGCTT	0	8	8	CTCGTGATAC	8	18	10	CC	18	20	2	AGATCATATGAAACAGCATGACTTTTTCAAGAGTGCCATGCCCGAA	20	66	46	GG	66	68	2		68	68	0	GTATCACGAG	68	78	10	G	78	79	1
243	caatgcttctcgtgatacccagatcatatgaaacagcatgactttttcaagagtgccatgcccgaaggGAAAAAGTCAT	1	caatgcttctcgtgatacccagatcatatgaaacagc aagagtgcc atgactttttc a TACTGAAAAAG t ggaagcccg	CAATGCTTCTCGTGATACCCAGATCATATGAAACAGC	0	37	37	ATGACTTTTTC	37	48	11		48	48	0	AAGAGTGCCATGCCCGAAGG	48	68	20		68	68	0		68	68	0	GAAAAAGTCAT	68	79	11		79	79	0
244	caatgcttctcgtgatacccagatcatatgaaacagcatgactttttcaagagtgccatgcccgaaggCAATGCTTCTCGTGATACCCAC	1	caatgcttctcgtgatacccagatcatatgaaacagcatgactttttcaagagtgcca c tgcc g ACgg a CACCCATAGTGCTCTTCGTA a	CAATGCTTCTCGTGATACCCAGATCATATGAAACAGCATGACTTTTTCAAGAGTGCCA	0	58	58	TG	58	60	2	CC	60	62	2	CGAA	62	66	4	GG	66	68	2		68	68	0	CA	68	70	2	ATGCTTCTCGTGATACCCAC	70	90	20
245	caatgcttctcgtgatacccagatcatatgaaacagcatgactttttcaagagtgccatgcccgaaggCATGGCACTCTTGAAAAAGAGTGCCATGC	1	caatgcttctcgtgatacccagatcatatgaaacagcatga c ctttttcaagagtgccatgcc g GAAAAAGTTCTCACGGTACgg a CGTACCGTGA a	CAATGCTTCTCGTGATACCCAGATCATATGAAACAGCATGA	0	41	41	CTTTTTCAAGAGTGCCATG	41	60	19	CC	60	62	2	CGAA	62	66	4	GG	66	68	2		68	68	0	CATGGCACTCTTGAAAAAG	68	87	19	AGTGCCATGC	87	97	10
246	caatgcttctcgtgatacccagatcatatgaaacagcatgactttttcaagagtgccatgcccgaaggGCAATGCTTCGGGCATTGCCCTTC	1	caatgcttctcgtgatacccagatcatatgaaacagcatgactttttcaagagtgccatgccc GCAATGCTT gaagg C CTTCCCGTTACGGG	CAATGCTTCTCGTGATACCCAGATCATATGAAACAGCATGACTTTTTCAAGAGTGCCATGCCC	0	63	63	GAAGG	63	68	5		68	68	0		68	68	0		68	68	0	GCAATGCTTCGGGCATTGC	68	87	19	CCTTC	87	92	5		92	92	0
247	caatgcttctcgtgatacccagatcatatgaaacagcatgactttttcaagagtgccatgcccgaaggGGCATTGC	1	caatgcttctcgtgatacccagatcatatgaaacagcatgactttttcaagagtgcc g atgccc a TACGGg a CGT g	CAATGCTTCTCGTGATACCCAGATCATATGAAACAGCATGACTTTTTCAAGAGTGCC	0	57	57	ATGCC	57	62	5	C	62	63	1	GAAG	63	67	4	G	67	68	1		68	68	0	GGCAT	68	73	5	TGC	73	76	3
248	caatgcttctcgtgatacccagatcatatgaaacagcatgactttttcaagagtgccatgcccgaaggCCATGCTGTTTCATATGATCTGGGT	1	caatgcttctcgtgat actttttcaagagt acccagatcatatgaaacagcatg g TGGGTCTAGTATACTTTGTCGTACCggaagcccgtacc	CAATGCTTCTCGTGAT	0	16	16	ACCCAGATCATATGAAACAGCATG	16	40	24		40	40	0	ACTTTTTCAAGAGTGCCATGCCCGAAGG	40	68	28		68	68	0	C	68	69	1	CATGCTGTTTCATATGATCTGGGT	69	93	24		93	93	0
249	caatgcttctcgtgatacccagatcatatgaaacagcatgactttttcaagagtgccatgcccgaaggGGCGCATTGG	1	caatgcttctcgtgatacccagatcatatgaaacagcatgactttttcaagagtgccat g gccc a CGGg a GGTTACG g	CAATGCTTCTCGTGATACCCAGATCATATGAAACAGCATGACTTTTTCAAGAGTGCCAT	0	59	59	GCC	59	62	3	C	62	63	1	GAAG	63	67	4	G	67	68	1		68	68	0	GGC	68	71	3	GCATTGG	71	78	7
250	caatgcttctcgtgatacccagatcatatgaaacagcatgactttttcaagagtgccatgcccgaaggGCATGGCACTCCAATGCTTCCTTGAAAAAGTCATGCTGTTTCAT	1	caatgcttctcgtgatacccagatcatatgaaacagcatgactttttcaa g gagtgccatgccc a CTCACGGTACGgga TACTTTGTCGTACTGAAAAAGTTCCTTCGTAAC	CAATGCTTCTCGTGATACCCAGATCATATGAAACAGCATGACTTTTTCAA	0	50	50	GAGTGCCATGC	50	61	11	CC	61	63	2	GAA	63	66	3	GG	66	68	2		68	68	0	GCATGGCACTC	68	79	11	CAATGCTTCCTTGAAAAAGTCATGCTGTTTCAT	79	112	33
251	caatgcttctcgtgatacccagatcatatgaaacagcatgactttttcaagagtgccatgcccgaaggCACTCTTGAT	1	caatgcttctcgtgatacccagatcatatgaaacagcatgactttt atgc tcaagagtgcc c AGTTCTCACggaagc T	CAATGCTTCTCGTGATACCCAGATCATATGAAACAGCATGACTTTT	0	46	46	TCAAGAGTG	46	55	9	CC	55	57	2	ATGCCCGAA	57	66	9	GG	66	68	2		68	68	0	CACTCTTGA	68	77	9	T	77	78	1
252	caatgcttctcgtgatacccagatcatatgaaacagcatgactttttcaagagtgccatgcccgaaggATAT	1	caatgcttctcgtg cagatcatatgaaacagcatgac ata-cc t TATAggaagcccgtaccgtgagaactttt	CAATGCTTCTCGTG	0	14	14	ATA	14	17	3	CC	17	19	2	CAGATCATATGAAACAGCATGACTTTTTCAAGAGTGCCATGCCCGAA	19	66	47	GG	66	68	2	A	68	69	1	TAT	69	72	3		72	72	0
253	caatgcttctcgtgatacccagatcatatgaaacagcatgactttttcaagagtgccatgcccgaaggCATTGAC	1	ttctcgtgatacccagatcatatgaaacag caatgc c GTTACggaagcccgtaccgtgagaactttttcagta CA		0	0	0	CAATG	0	5	5	C	5	6	1	TTCTCGTGATACCCAGATCATATGAAACAGCATGACTTTTTCAAGAGTGCCATGCCCGAAG	6	67	61	G	67	68	1		68	68	0	CATTG	68	73	5	AC	73	75	2
254	caatgcttctcgtgatacccagatcatatgaaacagcatgactttttcaagagtgccatgcccgaaggGGCCAATGCT	1	caatgcttctcgtgatacccagatcatatgaaacagcatgactttttcaagagtgccat g gccc a CGGg a TCGTAAC g	CAATGCTTCTCGTGATACCCAGATCATATGAAACAGCATGACTTTTTCAAGAGTGCCAT	0	59	59	GCC	59	62	3	C	62	63	1	GAAG	63	67	4	G	67	68	1		68	68	0	GGC	68	71	3	CAATGCT	71	78	7
255	caatgcttctcgtgatacccagatcatatgaaacagcatgactttttcaagagtgccatgcccgaaggCACTCTTGAAAAATTCAAGAGTGCCATGCCCGA	1	caatgcttctcgtgatacccagatcatatgaaacagcatgac atgc tttttcaagagtgcc c AAAAAGTTCTCACggaagc AGCCCGTACCGTGAGAACTT	CAATGCTTCTCGTGATACCCAGATCATATGAAACAGCATGAC	0	42	42	TTTTTCAAGAGTG	42	55	13	CC	55	57	2	ATGCCCGAA	57	66	9	GG	66	68	2		68	68	0	CACTCTTGAAAAA	68	81	13	TTCAAGAGTGCCATGCCCGA	81	101	20
256	caatgcttctcgtgatacccagatcatatgaaacagcatgactttttcaagagtgccatgcccgaaggGTCATGCTGTTTCATATGGT	1	caatgcttctcgtgatacccagat tttttcaagagt catatgaaacagcatgac g GTATACTTTGTCGTACTG c TG ggaagcccgtac	CAATGCTTCTCGTGATACCCAGAT	0	24	24	CATATGAAACAGCATGAC	24	42	18		42	42	0	TTTTTCAAGAGTGCCATGCCCGAAGG	42	68	26		68	68	0		68	68	0	GTCATGCTGTTTCATATG	68	86	18	GT	86	88	2
257	caatgcttctcgtgatacccagatcatatgaaacagcatgactttttcaagagtgccatgcccgaaggGGCATGCCACTCTTGAAAAA	1	caatgcttctcgtgatacccagatcatatgaaacagcatgactttttcaagagtgc g catgccc a GTACGGg a AAAAAGTTCTCACC g	CAATGCTTCTCGTGATACCCAGATCATATGAAACAGCATGACTTTTTCAAGAGTGC	0	56	56	CATGCC	56	62	6	C	62	63	1	GAAG	63	67	4	G	67	68	1		68	68	0	GGCATG	68	74	6	CCACTCTTGAAAAA	74	88	14
258	caatgcttctcgtgatacccagatcatatgaaacagcatgactttttcaagagtgccatgcccgaaggTCGGGCATA	1	caatgcttctcgtgatacccagatcatatgaaacagcatgactttttcaagagtgcc a atgcccga g TACGGGCTg A	CAATGCTTCTCGTGATACCCAGATCATATGAAACAGCATGACTTTTTCAAGAGTGCC	0	57	57	ATGCCCGA	57	65	8		65	65	0	AGG	65	68	3		68	68	0		68	68	0	TCGGGCAT	68	76	8	A	76	77	1
259	caatgcttctcgtgatacccagatcatatgaaacagcatgactttttcaagagtgccatgcccgaaggATTGAAACAGCAT	1	caatgcttctcgtgatacccagatcatatgaaacagcatgactt gagtgccat tttcaa g AAAGTTAggaagccc TACGAC	CAATGCTTCTCGTGATACCCAGATCATATGAAACAGCATGACTT	0	44	44	TTTCAA	44	50	6		50	50	0	GAGTGCCATGCCCGAAGG	50	68	18		68	68	0	A	68	69	1	TTGAAA	69	75	6	CAGCAT	75	81	6
260	caatgcttctcgtgatacccagatcatatgaaacagcatgactttttcaagagtgccatgcccgaaggGGCATGGTACTCT	1	caatgcttctcgtgatacccagatcatatgaaacagcatgactttttcaagagtg g ccatgccc a GGTACGGg a TCTCAT g	CAATGCTTCTCGTGATACCCAGATCATATGAAACAGCATGACTTTTTCAAGAGTG	0	55	55	CCATGCC	55	62	7	C	62	63	1	GAAG	63	67	4	G	67	68	1		68	68	0	GGCATGG	68	75	7	TACTCT	75	81	6
261	caatgcttctcgtgatacccagatcatatgaaacagcatgactttttcaagagtgccatgcccgaaggGTATCA	1	caatgcttctcg agatcatatgaaacagcatgac tgataccc t ACTATGgg t aagcccgtaccgtgagaacttt	CAATGCTTCTCG	0	12	12	TGATAC	12	18	6	CC	18	20	2	AGATCATATGAAACAGCATGACTTTTTCAAGAGTGCCATGCCCGAA	20	66	46	GG	66	68	2		68	68	0	GTATCA	68	74	6		74	74	0
262	caatgcttctcgtgatacccagatcatatgaaacagcatgactttttcaagagtgccatgcccgaaggCACTCTTGAAAAAGAGTGCCTTCGGCACTCTTTTTCAAGAGT	1	caatgcttctcgtgatacccagatcatatgaaacagcatga atgc ctttttcaagagtgcc c GAAAAAGTTCTCACggaagc TGAGAACTTTTTCTCACGGCTTCCGTGA	CAATGCTTCTCGTGATACCCAGATCATATGAAACAGCATGA	0	41	41	CTTTTTCAAGAGTG	41	55	14	CC	55	57	2	ATGCCCGAA	57	66	9	GG	66	68	2		68	68	0	CACTCTTGAAAAAG	68	82	14	AGTGCCTTCGGCACTCTTTTTCAAGAGT	82	110	28
263	caatgcttctcgtgatacccagatcatatgaaacagcatgactttttcaagagtgccatgcccgaaggGCAAGGCCC	1	caatgcttctcgtgatacccagatcatatgaaacagcatgactttttcaagagtgcca g tgccc a ACGgga CCCGGA	CAATGCTTCTCGTGATACCCAGATCATATGAAACAGCATGACTTTTTCAAGAGTGCCA	0	58	58	TGC	58	61	3	CC	61	63	2	GAA	63	66	3	GG	66	68	2		68	68	0	GCA	68	71	3	AGGCCC	71	77	6
264	caatgcttctcgtgatacccagatcatatgaaacagcatgactttttcaagagtgccatgcccgaaggGCACTCTTGAAAAAGTCA	1	caatgcttctcgtgatacccagatcatatgaaacagca atgc tgactttttcaagagtgcc c ACTGAAAAAGTTCTCACGg c gaag	CAATGCTTCTCGTGATACCCAGATCATATGAAACAGCA	0	38	38	TGACTTTTTCAAGAGTGC	38	56	18	C	56	57	1	ATGCCCGAAG	57	67	10	G	67	68	1		68	68	0	GCACTCTTGAAAAAGTCA	68	86	18		86	86	0
265	caatgcttctcgtgatacccagatcatatgaaacagcatgactttttcaagagtgccatgcccgaaggGCATGGCACTCTTGGC	1	caatgcttctcgtgatacccagatcatatgaaacagcatgacttttt g caagagtgccatgccc a GTTCTCACGGTACGgga CG	CAATGCTTCTCGTGATACCCAGATCATATGAAACAGCATGACTTTTT	0	47	47	CAAGAGTGCCATGC	47	61	14	CC	61	63	2	GAA	63	66	3	GG	66	68	2		68	68	0	GCATGGCACTCTTG	68	82	14	GC	82	84	2
266	caatgcttctcgtgatacccagatcatatgaaacagcatgactttttcaagagtgccatgcccgaaggCACTCTTGAAAAAGAGTGCCTTC	1	caatgcttctcgtgatacccagatcatatgaaacagcatga atgc ctttttcaagagtgcc c GAAAAAGTTCTCACggaagc CTTCCGTGA	CAATGCTTCTCGTGATACCCAGATCATATGAAACAGCATGA	0	41	41	CTTTTTCAAGAGTG	41	55	14	CC	55	57	2	ATGCCCGAA	57	66	9	GG	66	68	2		68	68	0	CACTCTTGAAAAAG	68	82	14	AGTGCCTTC	82	91	9
267	caatgcttctcgtgatacccagatcatatgaaacagcatgactttttcaagagtgccatgcccgaaggCACTCTTGAAGAT	1	caatgcttctcgtgatacccagatcatatgaaacagcatgacttt atgc ttcaagagtgcc c AAGTTCTCACggaagc TAG	CAATGCTTCTCGTGATACCCAGATCATATGAAACAGCATGACTTT	0	45	45	TTCAAGAGTG	45	55	10	CC	55	57	2	ATGCCCGAA	57	66	9	GG	66	68	2		68	68	0	CACTCTTGAA	68	78	10	GAT	78	81	3
268	caatgcttctcgtgatacccagatcatatgaaacagcatgactttttcaagagtgccatgcccgaaggGTCAATGCTTCAATTGAAGCATTGACCCTTCA	1	caatgcttctcgtgatacccagatcatatgaaacagcatgactttttcaagagtgccatgccc GTCAATGCTTCA gaagg A CTTCC T A CAGTTACGAAGT	CAATGCTTCTCGTGATACCCAGATCATATGAAACAGCATGACTTTTTCAAGAGTGCCATGCCC	0	63	63	GAAGG	63	68	5		68	68	0		68	68	0		68	68	0	GTCAATGCTTCAATTGAAGCATTGAC	68	94	26	CCTTC	94	99	5	A	99	100	1
269	caatgcttctcgtgatacccagatcatatgaaacagcatgactttttcaagagtgccatgcccgaaggCCATGCTGTTTCATATGA	1	caatgcttctcgtgatacccaga actttttcaagagt tcatatgaaacagcatg g AGTATACTTTGTCGTACCggaagcccgtacc	CAATGCTTCTCGTGATACCCAGA	0	23	23	TCATATGAAACAGCATG	23	40	17		40	40	0	ACTTTTTCAAGAGTGCCATGCCCGAAGG	40	68	28		68	68	0	C	68	69	1	CATGCTGTTTCATATGA	69	86	17		86	86	0
270	caatgcttctcgtgatacccagatcatatgaaacagcatgactttttcaagagtgccatgcccgaaggCCTTGAAAAAGTCATGCTGT	1	caatgcttctcgtgatacccagatcatatgaa agtgccat acagcatgactttttcaag g TGTCGTACTGAAAAAGTTC c Cggaagcc	CAATGCTTCTCGTGATACCCAGATCATATGAA	0	32	32	ACAGCATGACTTTTTCAAG	32	51	19		51	51	0	AGTGCCATGCCCGAAGG	51	68	17		68	68	0	C	68	69	1	CTTGAAAAAGTCATGCTGT	69	88	19		88	88	0
271	caatgcttctcgtgatacccagatcatatgaaacagcatgactttttcaagagtgccatgcccgaaggCACTCTTGAAAAGAGTGCCTTCGGGCAT	1	caatgcttctcgtgatacccagatcatatgaaacagcatgact atgc ttttcaagagtgcc c AAAAGTTCTCACggaagc TACGGGCTTCCGTGAG	CAATGCTTCTCGTGATACCCAGATCATATGAAACAGCATGACT	0	43	43	TTTTCAAGAGTG	43	55	12	CC	55	57	2	ATGCCCGAA	57	66	9	GG	66	68	2		68	68	0	CACTCTTGAAAA	68	80	12	GAGTGCCTTCGGGCAT	80	96	16
272	caatgcttctcgtgatacccagatcatatgaaacagcatgactttttcaagagtgccatgcccgaaggGCATGGCACTCTTGAGAAA	1	caatgcttctcgtgatacccagatcatatgaaacagcatgactttt g tcaagagtgccatgccc a AGTTCTCACGGTACGgga AAAG	CAATGCTTCTCGTGATACCCAGATCATATGAAACAGCATGACTTTT	0	46	46	TCAAGAGTGCCATGC	46	61	15	CC	61	63	2	GAA	63	66	3	GG	66	68	2		68	68	0	GCATGGCACTCTTGA	68	83	15	GAAA	83	87	4
273	caatgcttctcgtgatacccagatcatatgaaacagcatgactttttcaagagtgccatgcccgaaggGCATAGCACTCTT	1	caatgcttctcgtgatacccagatcatatgaaacagcatgactttttcaagagtgcc g atgccc a TACGgga TTCTCACGA	CAATGCTTCTCGTGATACCCAGATCATATGAAACAGCATGACTTTTTCAAGAGTGCC	0	57	57	ATGC	57	61	4	CC	61	63	2	GAA	63	66	3	GG	66	68	2		68	68	0	GCAT	68	72	4	AGCACTCTT	72	81	9
274	caatgcttctcgtgatacccagatcatatgaaacagcatgactttttcaagagtgccatgcccgaaggCCCTCTTGAAAAAGTCATGCTGTA	1	caatgcttctcgtgatacccagatcatatgaa tgccatgc acagcatgactttttcaagag c TGTCGTACTGAAAAAGTTCTCCCggaagc A	CAATGCTTCTCGTGATACCCAGATCATATGAA	0	32	32	ACAGCATGACTTTTTCAAGAG	32	53	21		53	53	0	TGCCATGCCCGAAGG	53	68	15		68	68	0	CC	68	70	2	CTCTTGAAAAAGTCATGCTGT	70	91	21	A	91	92	1
275	caatgcttctcgtgatacccagatcatatgaaacagcatgactttttcaagagtgccatgcccgaaggTCATGCTGTTTCATATGATA	1	caatgcttctcgtgatacccag tttttcaagagt atcatatgaaacagcatgac g TAGTATACTTTGTCGTACTggaagcccgtacc A	CAATGCTTCTCGTGATACCCAG	0	22	22	ATCATATGAAACAGCATGA	22	41	19	C	41	42	1	TTTTTCAAGAGTGCCATGCCCGAAG	42	67	25	G	67	68	1		68	68	0	TCATGCTGTTTCATATGAT	68	87	19	A	87	88	1
276	caatgcttctcgtgatacccagatcatatgaaacagcatgactttttcaagagtgccatgcccgaaggTCATGCTGTTAT	1	caatgcttctcgtgatacccagatcatatga tttttcaagagt aacagcatgac g TTGTCGTACTggaagcccgtacc TA	CAATGCTTCTCGTGATACCCAGATCATATGA	0	31	31	AACAGCATGA	31	41	10	C	41	42	1	TTTTTCAAGAGTGCCATGCCCGAAG	42	67	25	G	67	68	1		68	68	0	TCATGCTGTT	68	78	10	AT	78	80	2
277	caatgcttctcgtgatacccagatcatatgaaacagcatgactttttcaagagtgccatgcccgaaggTCATGCTGTTTCATAAGATCTGGGTATCTTATGAAACA	1	caatgcttctcgtgatacccagatca tttttcaagagt tatgaaacagcatgac g ATACTTTGTCGTACTggaagcccgtacc ACAAAGTATTCTATGGGTCTAGA	CAATGCTTCTCGTGATACCCAGATCA	0	26	26	TATGAAACAGCATGA	26	41	15	C	41	42	1	TTTTTCAAGAGTGCCATGCCCGAAG	42	67	25	G	67	68	1		68	68	0	TCATGCTGTTTCATA	68	83	15	AGATCTGGGTATCTTATGAAACA	83	106	23
278	caatgcttctcgtgatacccagatcatatgaaacagcatgactttttcaagagtgccatgcccgaaggGTCTGGCACTCTTGAAAAAG	1	caatgcttctcgtgatacccagatcatatgaaacagcatga tgcccg ctttttcaagagtgcca a GAAAAAGTTCTCACGGTCTGgga	CAATGCTTCTCGTGATACCCAGATCATATGAAACAGCATGA	0	41	41	CTTTTTCAAGAGTGCCA	41	58	17		58	58	0	TGCCCGAAGG	58	68	10		68	68	0	GTC	68	71	3	TGGCACTCTTGAAAAAG	71	88	17		88	88	0
279	caatgcttctcgtgatacccagatcatatgaaacagcatgactttttcaagagtgccatgcccgaaggCCTGGCACTCTTGAAAAGTCATGCTGTT	1	caatgcttctcgtgatacccagatcatatgaaacagcatgact tgccc ttttcaagagtgcca g AAAAGTTCTCACGGT a TTGTCGTACTG CCgga	CAATGCTTCTCGTGATACCCAGATCATATGAAACAGCATGACT	0	43	43	TTTTCAAGAGTGCCA	43	58	15		58	58	0	TGCCCGAAGG	58	68	10		68	68	0	CC	68	70	2	TGGCACTCTTGAAAA	70	85	15	GTCATGCTGTT	85	96	11
280	caatgcttctcgtgatacccagatcatatgaaacagcatgactttttcaagagtgccatgcccgaaggGGCATGGCAGTCTTGAAAAA	1	caatgcttctcgtgatacccagatcatatgaaacagcatgactttttcaagag g tgccatgccc a ACGGTACGGg a AAAAAGTTCTG g	CAATGCTTCTCGTGATACCCAGATCATATGAAACAGCATGACTTTTTCAAGAG	0	53	53	TGCCATGCC	53	62	9	C	62	63	1	GAAG	63	67	4	G	67	68	1		68	68	0	GGCATGGCA	68	77	9	GTCTTGAAAAA	77	88	11
281	caatgcttctcgtgatacccagatcatatgaaacagcatgactttttcaagagtgccatgcccgaaggCCTGGCACTCCTGAAAAAGTCATGATGTTTC	1	caatgcttctcgtgatacccagatcatatgaaacagcatgactttttcaa tgccc gagtgcca g CTCACGGT a CTTTGTAGTACTGAAAAAGTC CCgga	CAATGCTTCTCGTGATACCCAGATCATATGAAACAGCATGACTTTTTCAA	0	50	50	GAGTGCCA	50	58	8		58	58	0	TGCCCGAAGG	58	68	10		68	68	0	CC	68	70	2	TGGCACTC	70	78	8	CTGAAAAAGTCATGATGTTTC	78	99	21
282	caatgcttctcgtgatacccagatcatatgaaacagcatgactttttcaagagtgccatgcccgaaggGTATCGT	1	caatgcttctcgt agatcatatgaaacagcatgac gataccc t CTATGgg t TG aagcccgtaccgtgagaacttt	CAATGCTTCTCGT	0	13	13	GATAC	13	18	5	CC	18	20	2	AGATCATATGAAACAGCATGACTTTTTCAAGAGTGCCATGCCCGAA	20	66	46	GG	66	68	2		68	68	0	GTATC	68	73	5	GT	73	75	2
283	caatgcttctcgtgatacccagatcatatgaaacagcatgactttttcaagagtgccatgcccgaaggACGAGAAACA	1	caatgc gatacccagatcatatgaaacagcatg ttctcgt a AAGAGCAggaagcccgtaccgtgagaactttttc ACA	CAATGC	0	6	6	TTCTCGT	6	13	7		13	13	0	GATACCCAGATCATATGAAACAGCATGACTTTTTCAAGAGTGCCATGCCCGAAGG	13	68	55		68	68	0		68	68	0	ACGAGAA	68	75	7	ACA	75	78	3
284	caatgcttctcgtgatacccagatcatatgaaacagcatgactttttcaagagtgccatgcccgaaggGCATGGCACTCTTGAAAC	1	caatgcttctcgtgatacccagatcatatgaaacagcatgactt g tttcaagagtgccatgccc a AAAGTTCTCACGGTACGgga C	CAATGCTTCTCGTGATACCCAGATCATATGAAACAGCATGACTT	0	44	44	TTTCAAGAGTGCCATGC	44	61	17	CC	61	63	2	GAA	63	66	3	GG	66	68	2		68	68	0	GCATGGCACTCTTGAAA	68	85	17	C	85	86	1
285	caatgcttctcgtgatacccagatcatatgaaacagcatgactttttcaagagtgccatgcccgaaggGTATCAAGAGAAGCATG	1	caatgcttctcg agatcatatgaaacagcatgac tgataccc t ACTATGgg t GTACGAAGAGA aagcccgtaccgtgagaacttt	CAATGCTTCTCG	0	12	12	TGATAC	12	18	6	CC	18	20	2	AGATCATATGAAACAGCATGACTTTTTCAAGAGTGCCATGCCCGAA	20	66	46	GG	66	68	2		68	68	0	GTATCA	68	74	6	AGAGAAGCATG	74	85	11
286	caatgcttctcgtgatacccagatcatatgaaacagcatgactttttcaagagtgccatgcccgaaggCCATGCTGTT	1	caatgcttctcgtgatacccagatcatatga actttttcaagagt aacagcatg g TTGTCGTACCggaagcccgtacc	CAATGCTTCTCGTGATACCCAGATCATATGA	0	31	31	AACAGCATG	31	40	9		40	40	0	ACTTTTTCAAGAGTGCCATGCCCGAAGG	40	68	28		68	68	0	C	68	69	1	CATGCTGTT	69	78	9		78	78	0
287	caatgcttctcgtgatacccagatcatatgaaacagcatgactttttcaagagtgccatgcccgaaggGCATTGGACT	1	ttctcgtgatacccagatcatatgaaacag caatgc c GTTACG a TCAG ggaagcccgtaccgtgagaactttttcagt		0	0	0	CAATGC	0	6	6		6	6	0	TTCTCGTGATACCCAGATCATATGAAACAGCATGACTTTTTCAAGAGTGCCATGCCCGAAGG	6	68	62		68	68	0		68	68	0	GCATTG	68	74	6	GACT	74	78	4
288	caatgcttctcgtgatacccagatcatatgaaacagcatgactttttcaagagtgccatgcccgaaggCCACTCTTGAAAAAGTCATGCTGTTTCAT	1	caatgcttctcgtgatacccagatcat atgc atgaaacagcatgactttttcaagagtg-cc c TACTTTGTCGTACTGAAAAAGTTCTCACCggaagc	CAATGCTTCTCGTGATACCCAGATCAT	0	27	27	ATGAAACAGCATGACTTTTTCAAGAGTG	27	55	28	CC	55	57	2	ATGCCCGAA	57	66	9	GG	66	68	2	C	68	69	1	CACTCTTGAAAAAGTCATGCTGTTTCAT	69	97	28		97	97	0
289	caatgcttctcgtgatacccagatcatatgaaacagcatgactttttcaagagtgccatgcccgaaggGTATCACGAGAGCATTGAC	1	caatgct agatcatatgaaacagcatgac tctcgtgataccc t AGAGCACTATGgg t CAGTTACG aagcccgtaccgtgagaacttt	CAATGCT	0	7	7	TCTCGTGATAC	7	18	11	CC	18	20	2	AGATCATATGAAACAGCATGACTTTTTCAAGAGTGCCATGCCCGAA	20	66	46	GG	66	68	2		68	68	0	GTATCACGAGA	68	79	11	GCATTGAC	79	87	8
290	caatgcttctcgtgatacccagatcatatgaaacagcatgactttttcaagagtgccatgcccgaaggGTATCACGA	1	caatgcttc agatcatatgaaacagcatgac tcgtgataccc t AGCACTATGgg t aagcccgtaccgtgagaacttt	CAATGCTTC	0	9	9	TCGTGATAC	9	18	9	CC	18	20	2	AGATCATATGAAACAGCATGACTTTTTCAAGAGTGCCATGCCCGAA	20	66	46	GG	66	68	2		68	68	0	GTATCACGA	68	77	9		77	77	0
291	caatgcttctcgtgatacccagatcatatgaaacagcatgactttttcaagagtgccatgcccgaaggCATTGACACTCTTGAAAAAGAGTGTCAATGCCTT	1	ttctcgtgatacccagatcatatgaaacag caatgc c GTTACggaagcccgtaccgtgagaactttttcagta TTCCGTAACTGTGAGAAAAAGTTCTCACA		0	0	0	CAATG	0	5	5	C	5	6	1	TTCTCGTGATACCCAGATCATATGAAACAGCATGACTTTTTCAAGAGTGCCATGCCCGAAG	6	67	61	G	67	68	1		68	68	0	CATTG	68	73	5	ACACTCTTGAAAAAGAGTGTCAATGCCTT	73	102	29
292	caatgcttctcgtgatacccagatcatatgaaacagcatgactttttcaagagtgccatgcccgaaggGTATCACGAGAAGCATTGAAA	1	agatcatatgaaacagcatgac caatgcttctcgtgataccc t GTTACGAAGAGCACTATGgg t AAA aagcccgtaccgtgagaacttt		0	0	0	CAATGCTTCTCGTGATAC	0	18	18	CC	18	20	2	AGATCATATGAAACAGCATGACTTTTTCAAGAGTGCCATGCCCGAA	20	66	46	GG	66	68	2		68	68	0	GTATCACGAGAAGCATTG	68	86	18	AAA	86	89	3
293	caatgcttctcgtgatacccagatcatatgaaacagcatgactttttcaagagtgccatgcccgaaggCATTAC	1	c ttctcgtgatacccagatcatatgaaacag aatgc c TTACggaagcccgtaccgtgagaactttttcagta CA	C	0	1	1	AATG	1	5	4	C	5	6	1	TTCTCGTGATACCCAGATCATATGAAACAGCATGACTTTTTCAAGAGTGCCATGCCCGAAG	6	67	61	G	67	68	1		68	68	0	CATT	68	72	4	AC	72	74	2
294	caatgcttctcgtgatacccagatcatatgaaacagcatgactttttcaagagtgccatgcccgaaggCCACTCTTGAAAAAGTCATGCTGTTTC	1	caatgcttctcgtgatacccagatcatat atgc gaaacagcatgactttttcaagagtg-cc c CTTTGTCGTACTGAAAAAGTTCTCACCggaagc	CAATGCTTCTCGTGATACCCAGATCATAT	0	29	29	GAAACAGCATGACTTTTTCAAGAGTG	29	55	26	CC	55	57	2	ATGCCCGAA	57	66	9	GG	66	68	2	C	68	69	1	CACTCTTGAAAAAGTCATGCTGTTTC	69	95	26		95	95	0
295	caatgcttctcgtgatacccagatcatatgaaacagcatgactttttcaagagtgccatgcccgaaggGTCTCACGAGAAGCATTGA	1	tacccagatcatatgaaacagcatgac caatgcttctcgtga t GTTACGAAGAGCACT t A CTGggaagcccgtaccgtgagaacttt		0	0	0	CAATGCTTCTCGTGA	0	15	15		15	15	0	TACCCAGATCATATGAAACAGCATGACTTTTTCAAGAGTGCCATGCCCGAAGG	15	68	53		68	68	0	GTC	68	71	3	TCACGAGAAGCATTG	71	86	15	A	86	87	1
296	caatgcttctcgtgatacccagatcatatgaaacagcatgactttttcaagagtgccatgcccgaaggGGCTTGGCACTCTTGAAAT	1	caatgcttctcgtgatacccagatcatatgaaacagcatgactt tgcccg tttcaagagtgcca a AAAGTTCTCACGGT a T TCGGgg	CAATGCTTCTCGTGATACCCAGATCATATGAAACAGCATGACTT	0	44	44	TTTCAAGAGTGCCA	44	58	14		58	58	0	TGCCCGAAGG	58	68	10		68	68	0	GGCT	68	72	4	TGGCACTCTTGAAA	72	86	14	T	86	87	1
297	caatgcttctcgtgatacccagatcatatgaaacagcatgactttttcaagagtgccatgcccgaaggATTGACAC	1	gcttctcgtgatacccagatcatatgaaaca caat g GTTA c CACA ggaagcccgtaccgtgagaactttttcagta		0	0	0	CAAT	0	4	4		4	4	0	GCTTCTCGTGATACCCAGATCATATGAAACAGCATGACTTTTTCAAGAGTGCCATGCCCGAAGG	4	68	64		68	68	0		68	68	0	ATTG	68	72	4	ACAC	72	76	4
298	caatgcttctcgtgatacccagatcatatgaaacagcatgactttttcaagagtgccatgcccgaaggTCATGCTGTTTCAAT	1	caatgcttctcgtgatacccagatcata tttttcaagagt tgaaacagcatgac g ACTTTGTCGTACTggaagcccgtacc TA	CAATGCTTCTCGTGATACCCAGATCATA	0	28	28	TGAAACAGCATGA	28	41	13	C	41	42	1	TTTTTCAAGAGTGCCATGCCCGAAG	42	67	25	G	67	68	1		68	68	0	TCATGCTGTTTCA	68	81	13	AT	81	83	2
299	caatgcttctcgtgatacccagatcatatgaaacagcatgactttttcaagagtgccatgcccgaaggGAAGCA	1	caa tcgtgatacccagatcatatgaaacagca tgcttc t ACGAAGggaagcccgtaccgtgagaactttttcag	CAA	0	3	3	TGCTTC	3	9	6		9	9	0	TCGTGATACCCAGATCATATGAAACAGCATGACTTTTTCAAGAGTGCCATGCCCGAAGG	9	68	59		68	68	0		68	68	0	GAAGCA	68	74	6		74	74	0
300	caatgcttctcgtgatacccagatcatatgaaacagcatgactttttcaagagtgccatgcccgaaggGGCATGGCACTCTTGAAAAAGTCG	1	caatgcttctcgtgatacccagatcatatgaaacagcat g gactttttcaagagtgccatgccc a CTGAAAAAGTTCTCACGGTACGGg a G g	CAATGCTTCTCGTGATACCCAGATCATATGAAACAGCAT	0	39	39	GACTTTTTCAAGAGTGCCATGCC	39	62	23	C	62	63	1	GAAG	63	67	4	G	67	68	1		68	68	0	GGCATGGCACTCTTGAAAAAGTC	68	91	23	G	91	92	1
301	caatgcttctcgtgatacccagatcatatgaaacagcatgactttttcaagagtgccatgcccgaaggGCATGGCACTCTAGAAAAAGTCATGC	1	caatgcttctcgtgatacccagatcatatgaaacagcatgactttttca g agagtgccatgccc a TCTCACGGTACGgga CGTACTGAAAAAGA	CAATGCTTCTCGTGATACCCAGATCATATGAAACAGCATGACTTTTTCA	0	49	49	AGAGTGCCATGC	49	61	12	CC	61	63	2	GAA	63	66	3	GG	66	68	2		68	68	0	GCATGGCACTCT	68	80	12	AGAAAAAGTCATGC	80	94	14
302	caatgcttctcgtgatacccagatcatatgaaacagcatgactttttcaagagtgccatgcccgaaggATTGC	1	gcttctcgtgatacccagatcatatgaaaca caat g GTTA c C ggaagcccgtaccgtgagaactttttcagta		0	0	0	CAAT	0	4	4		4	4	0	GCTTCTCGTGATACCCAGATCATATGAAACAGCATGACTTTTTCAAGAGTGCCATGCCCGAAGG	4	68	64		68	68	0		68	68	0	ATTG	68	72	4	C	72	73	1
303	caatgcttctcgtgatacccagatcatatgaaacagcatgactttttcaagagtgccatgcccgaaggGTCATGCTGTTTCATATGAAG	1	caatgcttctcgtgatacccaga tttttcaagagt tcatatgaaacagcatgac g AGTATACTTTGTCGTACTG c GA ggaagcccgtac	CAATGCTTCTCGTGATACCCAGA	0	23	23	TCATATGAAACAGCATGAC	23	42	19		42	42	0	TTTTTCAAGAGTGCCATGCCCGAAGG	42	68	26		68	68	0		68	68	0	GTCATGCTGTTTCATATGA	68	87	19	AG	87	89	2
304	caatgcttctcgtgatacccagatcatatgaaacagcatgactttttcaagagtgccatgcccgaaggTCATGCTGTTTCATCATGACCTTCGGGCAT	1	caatgcttctcgtgatacccagatcat tttttcaagagt atgaaacagcatgac g TACTTTGTCGTACTggaagcccgtacc TACGGGCTTCCAGTAC	CAATGCTTCTCGTGATACCCAGATCAT	0	27	27	ATGAAACAGCATGA	27	41	14	C	41	42	1	TTTTTCAAGAGTGCCATGCCCGAAG	42	67	25	G	67	68	1		68	68	0	TCATGCTGTTTCAT	68	82	14	CATGACCTTCGGGCAT	82	98	16
305	caatgcttctcgtgatacccagatcatatgaaacagcatgactttttcaagagtgccatgcccgaaggGGTGAAGCATTC	1	caatgcttctcgtgat agatcatatgaaacagcatgact accc t TGGggaagcccgtaccgtgagaacttt CTTACGAAG	CAATGCTTCTCGTGAT	0	16	16	ACC	16	19	3	C	19	20	1	AGATCATATGAAACAGCATGACTTTTTCAAGAGTGCCATGCCCGAAG	20	67	47	G	67	68	1		68	68	0	GGT	68	71	3	GAAGCATTC	71	80	9
306	caatgcttctcgtgatacccagatcatatgaaacagcatgactttttcaagagtgccatgcccgaaggCACTCTTGAAAAAGCA	1	caatgcttctcgtgatacccagatcatatgaaacagcatga atgc ctttttcaagagtgcc c GAAAAAGTTCTCACggaagc AC	CAATGCTTCTCGTGATACCCAGATCATATGAAACAGCATGA	0	41	41	CTTTTTCAAGAGTG	41	55	14	CC	55	57	2	ATGCCCGAA	57	66	9	GG	66	68	2		68	68	0	CACTCTTGAAAAAG	68	82	14	CA	82	84	2
307	caatgcttctcgtgatacccagatcatatgaaacagcatgactttttcaagagtgccatgcccgaaggGTATCAAGAGATACCCTTCGGGCA	1	caatgcttctcgtgatacccagatcatatgaaacagcatgactttttcaagagtgcca GTATCA tgcccgaagg A ACGGGCTTCC G CATAGA	CAATGCTTCTCGTGATACCCAGATCATATGAAACAGCATGACTTTTTCAAGAGTGCCA	0	58	58	TGCCCGAAGG	58	68	10		68	68	0		68	68	0		68	68	0	GTATCAAGAGATAC	68	82	14	CCTTCGGGCA	82	92	10		92	92	0
308	caatgcttctcgtgatacccagatcatatgaaacagcatgactttttcaagagtgccatgcccgaaggTCATGCTGTTTCA	1	caatgcttctcgtgatacccagatcata tttttcaagagt tgaaacagcatgac g ACTTTGTCGTACTggaagcccgtacc	CAATGCTTCTCGTGATACCCAGATCATA	0	28	28	TGAAACAGCATGA	28	41	13	C	41	42	1	TTTTTCAAGAGTGCCATGCCCGAAG	42	67	25	G	67	68	1		68	68	0	TCATGCTGTTTCA	68	81	13		81	81	0
309	caatgcttctcgtgatacccagatcatatgaaacagcatgactttttcaagagtgccatgcccgaaggCACTCTTGAAAAAGTCATGCTGTTCAAGAGTGCCTTC	1	caatgcttctcgtgatacccagatcatatga atgc aacagcatgactttttcaagagtgcc c TTGTCGTACTGAAAAAGTTCTCACggaagc CTTCCGTGAGAAC	CAATGCTTCTCGTGATACCCAGATCATATGA	0	31	31	AACAGCATGACTTTTTCAAGAGTG	31	55	24	CC	55	57	2	ATGCCCGAA	57	66	9	GG	66	68	2		68	68	0	CACTCTTGAAAAAGTCATGCTGTT	68	92	24	CAAGAGTGCCTTC	92	105	13
310	caatgcttctcgtgatacccagatcatatgaaacagcatgactttttcaagagtgccatgcccgaaggGGCATTGCACTCTTGAAAAA	1	caatgcttctcgtgatacccagatcatatgaaacagcatgactttttcaagagtgcc g atgccc a TACGGg a AAAAAGTTCTCACGT g	CAATGCTTCTCGTGATACCCAGATCATATGAAACAGCATGACTTTTTCAAGAGTGCC	0	57	57	ATGCC	57	62	5	C	62	63	1	GAAG	63	67	4	G	67	68	1		68	68	0	GGCAT	68	73	5	TGCACTCTTGAAAAA	73	88	15
311	caatgcttctcgtgatacccagatcatatgaaacagcatgactttttcaagagtgccatgcccgaaggCATTGAACT	1	ttctcgtgatacccagatcatatgaaacag caatgc c GTTACggaagcccgtaccgtgagaactttttcagta TCAA		0	0	0	CAATG	0	5	5	C	5	6	1	TTCTCGTGATACCCAGATCATATGAAACAGCATGACTTTTTCAAGAGTGCCATGCCCGAAG	6	67	61	G	67	68	1		68	68	0	CATTG	68	73	5	AACT	73	77	4
312	caatgcttctcgtgatacccagatcatatgaaacagcatgactttttcaagagtgccatgcccgaaggCATGGCAATCTTGAAAAAGTCATGCTGT	1	caatgcttctcgtgatacccagatcatatgaaacagcatgactttttcaagag c tgccatgcc g ACGGTACgg a TGTCGTACTGAAAAAGTTCTA a	CAATGCTTCTCGTGATACCCAGATCATATGAAACAGCATGACTTTTTCAAGAG	0	53	53	TGCCATG	53	60	7	CC	60	62	2	CGAA	62	66	4	GG	66	68	2		68	68	0	CATGGCA	68	75	7	ATCTTGAAAAAGTCATGCTGT	75	96	21
313	caatgcttctcgtgatacccagatcatatgaaacagcatgactttttcaagagtgccatgcccgaaggGAAACA	1	caatgcttctcgtgatacccagatcatatgaaacagcatgactt aagagtgcc tttc a AAAG t AC ggaagcccg	CAATGCTTCTCGTGATACCCAGATCATATGAAACAGCATGACTT	0	44	44	TTTC	44	48	4		48	48	0	AAGAGTGCCATGCCCGAAGG	48	68	20		68	68	0		68	68	0	GAAA	68	72	4	CA	72	74	2
314	caatgcttctcgtgatacccagatcatatgaaacagcatgactttttcaagagtgccatgcccgaaggCATGGCACT	1	caatgcttctcgtgatacccagatcatatgaaacagcatgactttttcaag c agtgccatgcc g TCACGGTACgg a a	CAATGCTTCTCGTGATACCCAGATCATATGAAACAGCATGACTTTTTCAAG	0	51	51	AGTGCCATG	51	60	9	CC	60	62	2	CGAA	62	66	4	GG	66	68	2		68	68	0	CATGGCACT	68	77	9		77	77	0
315	caatgcttctcgtgatacccagatcatatgaaacagcatgactttttcaagagtgccatgcccgaaggGCATGGCACTCCTGAAAAAGT	1	caatgcttctcgtgatacccagatcatatgaaacagcatgactttttcaa g gagtgccatgccc a CTCACGGTACGgga TGAAAAAGTC	CAATGCTTCTCGTGATACCCAGATCATATGAAACAGCATGACTTTTTCAA	0	50	50	GAGTGCCATGC	50	61	11	CC	61	63	2	GAA	63	66	3	GG	66	68	2		68	68	0	GCATGGCACTC	68	79	11	CTGAAAAAGT	79	89	10
316	caatgcttctcgtgatacccagatcatatgaaacagcatgactttttcaagagtgccatgcccgaaggCACTCTTGAAAGA	1	caatgcttctcgtgatacccagatcatatgaaacagcatgactt atgc tttcaagagtgcc c AAAGTTCTCACggaagc AG	CAATGCTTCTCGTGATACCCAGATCATATGAAACAGCATGACTT	0	44	44	TTTCAAGAGTG	44	55	11	CC	55	57	2	ATGCCCGAA	57	66	9	GG	66	68	2		68	68	0	CACTCTTGAAA	68	79	11	GA	79	81	2
317	caatgcttctcgtgatacccagatcatatgaaacagcatgactttttcaagagtgccatgcccgaaggCCATGCTGTTTCATACAGCATGGCCTTCGGGCAT	1	caatgcttctcgtgatacccagatca actttttcaagagt tatgaaacagcatg g ATACTTTGTCGTACCggaagcccgtacc TACGGGCTTCCGGTACGAC	CAATGCTTCTCGTGATACCCAGATCA	0	26	26	TATGAAACAGCATG	26	40	14		40	40	0	ACTTTTTCAAGAGTGCCATGCCCGAAGG	40	68	28		68	68	0	C	68	69	1	CATGCTGTTTCATA	69	83	14	CAGCATGGCCTTCGGGCAT	83	102	19
318	caatgcttctcgtgatacccagatcatatgaaacagcatgactttttcaagagtgccatgcccgaaggTCATGCTGTTTCATATGAACTGG	1	caatgcttctcgtgatacccaga tttttcaagagt tcatatgaaacagcatgac g AGTATACTTTGTCGTACTggaagcccgtacc GGTCA	CAATGCTTCTCGTGATACCCAGA	0	23	23	TCATATGAAACAGCATGA	23	41	18	C	41	42	1	TTTTTCAAGAGTGCCATGCCCGAAG	42	67	25	G	67	68	1		68	68	0	TCATGCTGTTTCATATGA	68	86	18	ACTGG	86	91	5
319	caatgcttctcgtgatacccagatcatatgaaacagcatgactttttcaagagtgccatgcccgaaggGTATCACGAGAAGCC	1	caat agatcatatgaaacagcatgac gcttctcgtgataccc t CGAAGAGCACTATGgg t C aagcccgtaccgtgagaacttt	CAAT	0	4	4	GCTTCTCGTGATAC	4	18	14	CC	18	20	2	AGATCATATGAAACAGCATGACTTTTTCAAGAGTGCCATGCCCGAA	20	66	46	GG	66	68	2		68	68	0	GTATCACGAGAAGC	68	82	14	C	82	83	1
320	caatgcttctcgtgatacccagatcatatgaaacagcatgactttttcaagagtgccatgcccgaaggCACTCTTGAAT	1	caatgcttctcgtgatacccagatcatatgaaacagcatgacttt atgc ttcaagagtgcc c AAGTTCTCACggaagc T	CAATGCTTCTCGTGATACCCAGATCATATGAAACAGCATGACTTT	0	45	45	TTCAAGAGTG	45	55	10	CC	55	57	2	ATGCCCGAA	57	66	9	GG	66	68	2		68	68	0	CACTCTTGAA	68	78	10	T	78	79	1
321	caatgcttctcgtgatacccagatcatatgaaacagcatgactttttcaagagtgccatgcccgaaggCCTGGCACTCCTGAAAAAG	1	caatgcttctcgtgatacccagatcatatgaaacagcatgactttttcaa tgccc gagtgcca g CTCACGGT a GAAAAAGTC CCgga	CAATGCTTCTCGTGATACCCAGATCATATGAAACAGCATGACTTTTTCAA	0	50	50	GAGTGCCA	50	58	8		58	58	0	TGCCCGAAGG	58	68	10		68	68	0	CC	68	70	2	TGGCACTC	70	78	8	CTGAAAAAG	78	87	9
322	caatgcttctcgtgatacccagatcatatgaaacagcatgactttttcaagagtgccatgcccgaaggCACTCTTGAAGTGCCTTCGGGCAT	1	caatgcttctcgtgatacccagatcatatgaaacagcatgacttt atgc ttcaagagtgcc c AAGTTCTCACggaagc TACGGGCTTCCGTG	CAATGCTTCTCGTGATACCCAGATCATATGAAACAGCATGACTTT	0	45	45	TTCAAGAGTG	45	55	10	CC	55	57	2	ATGCCCGAA	57	66	9	GG	66	68	2		68	68	0	CACTCTTGAA	68	78	10	GTGCCTTCGGGCAT	78	92	14
323	caatgcttctcgtgatacccagatcatatgaaacagcatgactttttcaagagtgccatgcccgaaggCCAA	1	caatgcttctcgtgatacccagatcatatgaaacagcatgactttttcaagagtgcca c tg-cc g ACCgg a A a	CAATGCTTCTCGTGATACCCAGATCATATGAAACAGCATGACTTTTTCAAGAGTGCCA	0	58	58	TG	58	60	2	CC	60	62	2	CGAA	62	66	4	GG	66	68	2	C	68	69	1	CA	69	71	2	A	71	72	1
324	caatgcttctcgtgatacccagatcatatgaaacagcatgactttttcaagagtgccatgcccgaaggCATGGCACTCCT	1	caatgcttctcgtgatacccagatcatatgaaacagcatgactttttcaa c gagtgccatgcc g CTCACGGTACgg a TC a	CAATGCTTCTCGTGATACCCAGATCATATGAAACAGCATGACTTTTTCAA	0	50	50	GAGTGCCATG	50	60	10	CC	60	62	2	CGAA	62	66	4	GG	66	68	2		68	68	0	CATGGCACTC	68	78	10	CT	78	80	2
325	caatgcttctcgtgatacccagatcatatgaaacagcatgactttttcaagagtgccatgcccgaaggCACTCTTGAAAGTCATGCT	1	caatgcttctcgtgatacccagatcatatgaaacagcatgactt atgc tttcaagagtgcc c AAAGTTCTCACggaagc TCGTACTG	CAATGCTTCTCGTGATACCCAGATCATATGAAACAGCATGACTT	0	44	44	TTTCAAGAGTG	44	55	11	CC	55	57	2	ATGCCCGAA	57	66	9	GG	66	68	2		68	68	0	CACTCTTGAAA	68	79	11	GTCATGCT	79	87	8
326	caatgcttctcgtgatacccagatcatatgaaacagcatgactttttcaagagtgccatgcccgaaggTCATGCTGTTTCATATGATCTGGGA	1	caatgcttctcgtgata tttttcaagagt cccagatcatatgaaacagcatgac g GGGTCTAGTATACTTTGTCGTACTggaagcccgtacc A	CAATGCTTCTCGTGATA	0	17	17	CCCAGATCATATGAAACAGCATGA	17	41	24	C	41	42	1	TTTTTCAAGAGTGCCATGCCCGAAG	42	67	25	G	67	68	1		68	68	0	TCATGCTGTTTCATATGATCTGGG	68	92	24	A	92	93	1
327	caatgcttctcgtgatacccagatcatatgaaacagcatgactttttcaagagtgccatgcccgaaggCAATGCTTCATATGATCTGGGTATC	1	caatgcttctcgt acagcatgactttttcaaga gatacccagatcatatgaa g CTATGGGTCTAGTATACTT t CGTAACggaagcccgtaccg	CAATGCTTCTCGT	0	13	13	GATACCCAGATCATATGAA	13	32	19		32	32	0	ACAGCATGACTTTTTCAAGAGTGCCATGCCCGAAGG	32	68	36		68	68	0	CAATGC	68	74	6	TTCATATGATCTGGGTATC	74	93	19		93	93	0
328	caatgcttctcgtgatacccagatcatatgaaacagcatgactttttcaagagtgccatgcccgaaggGAAAT	1	caatgcttctcgtgatacccagatcatatgaaacagcatgactt aagagtgcc tttc a AAAG t T ggaagcccg	CAATGCTTCTCGTGATACCCAGATCATATGAAACAGCATGACTT	0	44	44	TTTC	44	48	4		48	48	0	AAGAGTGCCATGCCCGAAGG	48	68	20		68	68	0		68	68	0	GAAA	68	72	4	T	72	73	1
329	caatgcttctcgtgatacccagatcatatgaaacagcatgactttttcaagagtgccatgcccgaaggGCATGGCACTCTTGAAAAAGTCG	1	caatgcttctcgtgatacccagatcatatgaaacagcat g gactttttcaagagtgccatgccc a CTGAAAAAGTTCTCACGGTACGgga G	CAATGCTTCTCGTGATACCCAGATCATATGAAACAGCAT	0	39	39	GACTTTTTCAAGAGTGCCATGC	39	61	22	CC	61	63	2	GAA	63	66	3	GG	66	68	2		68	68	0	GCATGGCACTCTTGAAAAAGTC	68	90	22	G	90	91	1
330	caatgcttctcgtgatacccagatcatatgaaacagcatgactttttcaagagtgccatgcccgaaggCCATGCTGTTTCATAATCTGGGTATCT	1	caatgcttctcgtgatacccagatca actttttcaagagt tatgaaacagcatg g ATACTTTGTCGTACCggaagcccgtacc TCTATGGGTCTA	CAATGCTTCTCGTGATACCCAGATCA	0	26	26	TATGAAACAGCATG	26	40	14		40	40	0	ACTTTTTCAAGAGTGCCATGCCCGAAGG	40	68	28		68	68	0	C	68	69	1	CATGCTGTTTCATA	69	83	14	ATCTGGGTATCT	83	95	12
331	caatgcttctcgtgatacccagatcatatgaaacagcatgactttttcaagagtgccatgcccgaaggGCATGACACTCTTGAAAAAGTCG	1	caatgcttctcgtgatacccagatcatatgaaacagcatgactttttcaagagtgc g catgccc a GTACGgga GCTGAAAAAGTTCTCACA	CAATGCTTCTCGTGATACCCAGATCATATGAAACAGCATGACTTTTTCAAGAGTGC	0	56	56	CATGC	56	61	5	CC	61	63	2	GAA	63	66	3	GG	66	68	2		68	68	0	GCATG	68	73	5	ACACTCTTGAAAAAGTCG	73	91	18
332	caatgcttctcgtgatacccagatcatatgaaacagcatgactttttcaagagtgccatgcccgaaggGTATCACGAGAAC	1	caatgc agatcatatgaaacagcatgac ttctcgtgataccc t AAGAGCACTATGgg t C aagcccgtaccgtgagaacttt	CAATGC	0	6	6	TTCTCGTGATAC	6	18	12	CC	18	20	2	AGATCATATGAAACAGCATGACTTTTTCAAGAGTGCCATGCCCGAA	20	66	46	GG	66	68	2		68	68	0	GTATCACGAGAA	68	80	12	C	80	81	1
333	caatgcttctcgtgatacccagatcatatgaaacagcatgactttttcaagagtgccatgcccgaaggTCATGCTGTTCC	1	caatgcttctcgtgatacccagatcatatga tttttcaagagt aacagcatgac g TTGTCGTACTggaagcccgtacc CC	CAATGCTTCTCGTGATACCCAGATCATATGA	0	31	31	AACAGCATGA	31	41	10	C	41	42	1	TTTTTCAAGAGTGCCATGCCCGAAG	42	67	25	G	67	68	1		68	68	0	TCATGCTGTT	68	78	10	CC	78	80	2
334	caatgcttctcgtgatacccagatcatatgaaacagcatgactttttcaagagtgccatgcccgaaggTCATGCTGTTTCATAGAT	1	caatgcttctcgtgatacccagatca tttttcaagagt tatgaaacagcatgac g ATACTTTGTCGTACTggaagcccgtacc TAG	CAATGCTTCTCGTGATACCCAGATCA	0	26	26	TATGAAACAGCATGA	26	41	15	C	41	42	1	TTTTTCAAGAGTGCCATGCCCGAAG	42	67	25	G	67	68	1		68	68	0	TCATGCTGTTTCATA	68	83	15	GAT	83	86	3
335	caatgcttctcgtgatacccagatcatatgaaacagcatgactttttcaagagtgccatgcccgaaggGCATGGCACC	1	caatgcttctcgtgatacccagatcatatgaaacagcatgactttttcaaga g gtgccatgccc a CACGGTACGgga C	CAATGCTTCTCGTGATACCCAGATCATATGAAACAGCATGACTTTTTCAAGA	0	52	52	GTGCCATGC	52	61	9	CC	61	63	2	GAA	63	66	3	GG	66	68	2		68	68	0	GCATGGCAC	68	77	9	C	77	78	1
336	caatgcttctcgtgatacccagatcatatgaaacagcatgactttttcaagagtgccatgcccgaaggCCTTCGGGCAT	1	caatgcttctcgtgatacccagatcatatgaaacagcatgactttttcaagagtgcc atgcccgaagg TACGGGCTTCC	CAATGCTTCTCGTGATACCCAGATCATATGAAACAGCATGACTTTTTCAAGAGTGCC	0	57	57	ATGCCCGAAGG	57	68	11		68	68	0		68	68	0		68	68	0		68	68	0	CCTTCGGGCAT	68	79	11		79	79	0
337	caatgcttctcgtgatacccagatcatatgaaacagcatgactttttcaagagtgccatgcccgaaggCAATGCTTCGGGCATGGCCTTCGGGCAT	1	caatgcttctcgtgatacccagatcatatgaaacagcatgactttttcaagagtgcc CAATGCTT atgcccgaagg C TACGGGCTTCCGGTACGGG	CAATGCTTCTCGTGATACCCAGATCATATGAAACAGCATGACTTTTTCAAGAGTGCC	0	57	57	ATGCCCGAAGG	57	68	11		68	68	0		68	68	0		68	68	0	CAATGCTTCGGGCATGG	68	85	17	CCTTCGGGCAT	85	96	11		96	96	0
338	caatgcttctcgtgatacccagatcatatgaaacagcatgactttttcaagagtgccatgcccgaaggTCATGCTGTTTCATATATCT	1	caatgcttctcgtgatacccagatc tttttcaagagt atatgaaacagcatgac g TATACTTTGTCGTACTggaagcccgtacc TCTA	CAATGCTTCTCGTGATACCCAGATC	0	25	25	ATATGAAACAGCATGA	25	41	16	C	41	42	1	TTTTTCAAGAGTGCCATGCCCGAAG	42	67	25	G	67	68	1		68	68	0	TCATGCTGTTTCATAT	68	84	16	ATCT	84	88	4
339	caatgcttctcgtgatacccagatcatatgaaacagcatgactttttcaagagtgccatgcccgaaggCCTCTTGAAAAA	1	caatgcttctcgtgatacccagatcatatgaaacagcatgac tgccatg tttttcaagag c AAAAAGTTCTC c Cggaagc	CAATGCTTCTCGTGATACCCAGATCATATGAAACAGCATGAC	0	42	42	TTTTTCAAGAG	42	53	11		53	53	0	TGCCATGCCCGAAGG	53	68	15		68	68	0	C	68	69	1	CTCTTGAAAAA	69	80	11		80	80	0
340	caatgcttctcgtgatacccagatcatatgaaacagcatgactttttcaagagtgccatgcccgaaggGCAATGGAACTCTTGAAAAA	1	caatgcttctcgtgatacccagatcatatgaaacagcatgactttttcaagagtgcca g tgccc a ACGgga AAAAAGTTCTCAAGGTA	CAATGCTTCTCGTGATACCCAGATCATATGAAACAGCATGACTTTTTCAAGAGTGCCA	0	58	58	TGC	58	61	3	CC	61	63	2	GAA	63	66	3	GG	66	68	2		68	68	0	GCA	68	71	3	ATGGAACTCTTGAAAAA	71	88	17
341	caatgcttctcgtgatacccagatcatatgaaacagcatgactttttcaagagtgccatgcccgaaggCAATGCTTCT	1	caatgcttctcgtgatacccagatcatatgaaacagcatgactttttcaagagtgcca c tgcc g ACgg a TCTTCGTA a	CAATGCTTCTCGTGATACCCAGATCATATGAAACAGCATGACTTTTTCAAGAGTGCCA	0	58	58	TG	58	60	2	CC	60	62	2	CGAA	62	66	4	GG	66	68	2		68	68	0	CA	68	70	2	ATGCTTCT	70	78	8
342	caatgcttctcgtgatacccagatcatatgaaacagcatgactttttcaagagtgccatgcccgaaggCCCAAT	1	caatgcttctcgtgatacccagatcatatgaaacagcatgactttttcaagagtgccatgcccgaag g C TAACC	CAATGCTTCTCGTGATACCCAGATCATATGAAACAGCATGACTTTTTCAAGAGTGCCATGCCCGAAGG	0	68	68		68	68	0		68	68	0		68	68	0		68	68	0		74	74	0		74	74	0		74	74	0
343	caatgcttctcgtgatacccagatcatatgaaacagcatgactttttcaagagtgccatgcccgaaggGTATCACGAGAAGCATTGAAT	1	agatcatatgaaacagcatgac caatgcttctcgtgataccc t GTTACGAAGAGCACTATGgg t TAA aagcccgtaccgtgagaacttt		0	0	0	CAATGCTTCTCGTGATAC	0	18	18	CC	18	20	2	AGATCATATGAAACAGCATGACTTTTTCAAGAGTGCCATGCCCGAA	20	66	46	GG	66	68	2		68	68	0	GTATCACGAGAAGCATTG	68	86	18	AAT	86	89	3
344	caatgcttctcgtgatacccagatcatatgaaacagcatgactttttcaagagtgccatgcccgaaggCACTCTTGAAAAAGTCATTGCTGTTT	1	caatgcttctcgtgatacccagatcatatgaaacagc atgc atgactttttcaagagtgcc c TACTGAAAAAGTTCTCACggaagc TTTGTCGT	CAATGCTTCTCGTGATACCCAGATCATATGAAACAGC	0	37	37	ATGACTTTTTCAAGAGTG	37	55	18	CC	55	57	2	ATGCCCGAA	57	66	9	GG	66	68	2		68	68	0	CACTCTTGAAAAAGTCAT	68	86	18	TGCTGTTT	86	94	8
345	caatgcttctcgtgatacccagatcatatgaaacagcatgactttttcaagagtgccatgcccgaaggCCATGCTGTTTCATATGATA	1	caatgcttctcgtgatacccag actttttcaagagt atcatatgaaacagcatg g TAGTATACTTTGTCGTACCggaagcccgtacc A	CAATGCTTCTCGTGATACCCAG	0	22	22	ATCATATGAAACAGCATG	22	40	18		40	40	0	ACTTTTTCAAGAGTGCCATGCCCGAAGG	40	68	28		68	68	0	C	68	69	1	CATGCTGTTTCATATGAT	69	87	18	A	87	88	1
346	caatgcttctcgtgatacccagatcatatgaaacagcatgactttttcaagagtgccatgcccgaaggCCACTCTTGAAAAAGTGGCCTTCGGGCAT	1	caatgcttctcgtgatacccagatcatatgaaacagcatg atgc actttttcaagagtg-cc c TGAAAAAGTTCTCACCggaagc TACGGGCTTCCGG	CAATGCTTCTCGTGATACCCAGATCATATGAAACAGCATG	0	40	40	ACTTTTTCAAGAGTG	40	55	15	CC	55	57	2	ATGCCCGAA	57	66	9	GG	66	68	2	C	68	69	1	CACTCTTGAAAAAGT	69	84	15	GGCCTTCGGGCAT	84	97	13
347	caatgcttctcgtgatacccagatcatatgaaacagcatgactttttcaagagtgccatgcccgaaggCCACTCTTGAAAAGTCATGCTGT	1	caatgcttctcgtgatacccagatcatatgaaacagcatgact atgc ttttcaagagtg-cc c AAAAGTTCTCACCggaagc TGTCGTACTG	CAATGCTTCTCGTGATACCCAGATCATATGAAACAGCATGACT	0	43	43	TTTTCAAGAGTG	43	55	12	CC	55	57	2	ATGCCCGAA	57	66	9	GG	66	68	2	C	68	69	1	CACTCTTGAAAA	69	81	12	GTCATGCTGT	81	91	10
348	caatgcttctcgtgatacccagatcatatgaaacagcatgactttttcaagagtgccatgcccgaaggGATGGAAGTTCGGTTGCAAATGAACGCCAGTCACGGACCA	1	caatgcttctcgtgatacccagatcatatgaaacagcatgactttttcaagagtg gccc ccat g GGTA a ACCAGGCACTGACCGCAAGTAAACGTTGGCTTGAA Ggga	CAATGCTTCTCGTGATACCCAGATCATATGAAACAGCATGACTTTTTCAAGAGTG	0	55	55	CCAT	55	59	4		59	59	0	GCCCGAAGG	59	68	9		68	68	0	G	68	69	1	ATGG	69	73	4	AAGTTCGGTTGCAAATGAACGCCAGTCACGGACCA	73	108	35
349	caatgcttctcgtgatacccagatcatatgaaacagcatgactttttcaagagtgccatgcccgaaggGTCTCACGAGAAGCCAT	1	caat tacccagatcatatgaaacagcatgac gcttctcgtga t CGAAGAGCACT t TAC CTGggaagcccgtaccgtgagaacttt	CAAT	0	4	4	GCTTCTCGTGA	4	15	11		15	15	0	TACCCAGATCATATGAAACAGCATGACTTTTTCAAGAGTGCCATGCCCGAAGG	15	68	53		68	68	0	GTC	68	71	3	TCACGAGAAGC	71	82	11	CAT	82	85	3
350	caatgcttctcgtgatacccagatcatatgaaacagcatgactttttcaagagtgccatgcccgaaggCCATGCTGTTTCATCATATGAAACAGCATGACTTTTTCAAGAGTGCCATGCCCGAAGG	1	caatgcttctcgtgatacccagatcat actttttcaagagt atgaaacagcatg g TACTTTGTCGTACCggaagcccgtacc GGAAGCCCGTACCGTGAGAACTTTTTCAGTACGACAAAGTATAC	CAATGCTTCTCGTGATACCCAGATCAT	0	27	27	ATGAAACAGCATG	27	40	13		40	40	0	ACTTTTTCAAGAGTGCCATGCCCGAAGG	40	68	28		68	68	0	C	68	69	1	CATGCTGTTTCAT	69	82	13	CATATGAAACAGCATGACTTTTTCAAGAGTGCCATGCCCGAAGG	82	126	44
351	caatgcttctcgtgatacccagatcatatgaaacagcatgactttttcaagagtgccatgcccgaaggTCACTCTTGAAAAAGTCAAGAGTGACCTTCGGGC	1	caatgcttctcgtgatacccagatcatatgaaacagca atgc tgactttttcaagagtg-cc c ACTGAAAAAGTTCTCACTggaagc CGGGCTTCCAGTGAGA	CAATGCTTCTCGTGATACCCAGATCATATGAAACAGCA	0	38	38	TGACTTTTTCAAGAGTG	38	55	17	CC	55	57	2	ATGCCCGAA	57	66	9	GG	66	68	2	T	68	69	1	CACTCTTGAAAAAGTCA	69	86	17	AGAGTGACCTTCGGGC	86	102	16
352	caatgcttctcgtgatacccagatcatatgaaacagcatgactttttcaagagtgccatgcccgaaggGGTATCACCCCTTCGGGCAT	1	caatgcttctcgtgatacccagatcatatgaaacagcatgactttttcaagagtgcc GGTA atgcccgaagg T TACGGGCTTCCCCAC	CAATGCTTCTCGTGATACCCAGATCATATGAAACAGCATGACTTTTTCAAGAGTGCC	0	57	57	ATGCCCGAAGG	57	68	11		68	68	0		68	68	0		68	68	0	GGTATCACC	68	77	9	CCTTCGGGCAT	77	88	11		88	88	0
353	caatgcttctcgtgatacccagatcatatgaaacagcatgactttttcaagagtgccatgcccgaaggGCATGGCACACTTGAAAAAGTGTGTGTGTGCCAT	1	caatgcttctcgtgatacccagatcatatgaaacagcatgactttttcaaga g gtgccatgccc a CACGGTACGgga TACCGTGTGTGTGTGAAAAAGTTCA	CAATGCTTCTCGTGATACCCAGATCATATGAAACAGCATGACTTTTTCAAGA	0	52	52	GTGCCATGC	52	61	9	CC	61	63	2	GAA	63	66	3	GG	66	68	2		68	68	0	GCATGGCAC	68	77	9	ACTTGAAAAAGTGTGTGTGTGCCAT	77	102	25
354	caatgcttctcgtgatacccagatcatatgaaacagcatgactttttcaagagtgccatgcccgaaggCACTCTTGAAAAGTGCCTTCGGG	1	caatgcttctcgtgatacccagatcatatgaaacagcatgact atgc ttttcaagagtgcc c AAAAGTTCTCACggaagc GGGCTTCCGTG	CAATGCTTCTCGTGATACCCAGATCATATGAAACAGCATGACT	0	43	43	TTTTCAAGAGTG	43	55	12	CC	55	57	2	ATGCCCGAA	57	66	9	GG	66	68	2		68	68	0	CACTCTTGAAAA	68	80	12	GTGCCTTCGGG	80	91	11
355	caatgcttctcgtgatacccagatcatatgaaacagcatgactttttcaagagtgccatgcccgaaggGCATGGCACAT	1	caatgcttctcgtgatacccagatcatatgaaacagcatgactttttcaaga g gtgccatgccc a CACGGTACGgga TA	CAATGCTTCTCGTGATACCCAGATCATATGAAACAGCATGACTTTTTCAAGA	0	52	52	GTGCCATGC	52	61	9	CC	61	63	2	GAA	63	66	3	GG	66	68	2		68	68	0	GCATGGCAC	68	77	9	AT	77	79	2
356	caatgcttctcgtgatacccagatcatatgaaacagcatgactttttcaagagtgccatgcccgaaggCCTGGCACTCTTGAAAAT	1	caatgcttctcgtgatacccagatcatatgaaacagcatgact tgccc ttttcaagagtgcca g AAAAGTTCTCACGGT a T CCgga	CAATGCTTCTCGTGATACCCAGATCATATGAAACAGCATGACT	0	43	43	TTTTCAAGAGTGCCA	43	58	15		58	58	0	TGCCCGAAGG	58	68	10		68	68	0	CC	68	70	2	TGGCACTCTTGAAAA	70	85	15	T	85	86	1
357	caatgcttctcgtgatacccagatcatatgaaacagcatgactttttcaagagtgccatgcccgaaggTCATGCTGTTTCTTAT	1	caatgcttctcgtgatacccagatcatat tttttcaagagt gaaacagcatgac g CTTTGTCGTACTggaagcccgtacc TATT	CAATGCTTCTCGTGATACCCAGATCATAT	0	29	29	GAAACAGCATGA	29	41	12	C	41	42	1	TTTTTCAAGAGTGCCATGCCCGAAG	42	67	25	G	67	68	1		68	68	0	TCATGCTGTTTC	68	80	12	TTAT	80	84	4
358	caatgcttctcgtgatacccagatcatatgaaacagcatgactttttcaagagtgccatgcccgaaggCCTGGCACTCTTGAAAAGTCATACT	1	caatgcttctcgtgatacccagatcatatgaaacagcatgact tgccc ttttcaagagtgcca g AAAAGTTCTCACGGT a TCATACTG CCgga	CAATGCTTCTCGTGATACCCAGATCATATGAAACAGCATGACT	0	43	43	TTTTCAAGAGTGCCA	43	58	15		58	58	0	TGCCCGAAGG	58	68	10		68	68	0	CC	68	70	2	TGGCACTCTTGAAAA	70	85	15	GTCATACT	85	93	8
359	caatgcttctcgtgatacccagatcatatgaaacagcatgactttttcaagagtgccatgcccgaaggGTATA	1	caatgcttctcgtg agatcatatgaaacagcatgac ataccc t TATGgg t A aagcccgtaccgtgagaacttt	CAATGCTTCTCGTG	0	14	14	ATAC	14	18	4	CC	18	20	2	AGATCATATGAAACAGCATGACTTTTTCAAGAGTGCCATGCCCGAA	20	66	46	GG	66	68	2		68	68	0	GTAT	68	72	4	A	72	73	1
360	caatgcttctcgtgatacccagatcatatgaaacagcatgactttttcaagagtgccatgcccgaaggCACTCTTGAAAAAGTCATG	1	caatgcttctcgtgatacccagatcatatgaaacag atgc catgactttttcaagagtgcc c GTACTGAAAAAGTTCTCACggaagc	CAATGCTTCTCGTGATACCCAGATCATATGAAACAG	0	36	36	CATGACTTTTTCAAGAGTG	36	55	19	CC	55	57	2	ATGCCCGAA	57	66	9	GG	66	68	2		68	68	0	CACTCTTGAAAAAGTCATG	68	87	19		87	87	0
361	caatgcttctcgtgatacccagatcatatgaaacagcatgactttttcaagagtgccatgcccgaaggCACTCTTGAAAGAGT	1	caatgcttctcgtgatacccagatcatatgaaacagcatgactt atgc tttcaagagtgcc c AAAGTTCTCACggaagc TGAG	CAATGCTTCTCGTGATACCCAGATCATATGAAACAGCATGACTT	0	44	44	TTTCAAGAGTG	44	55	11	CC	55	57	2	ATGCCCGAA	57	66	9	GG	66	68	2		68	68	0	CACTCTTGAAA	68	79	11	GAGT	79	83	4
362	caatgcttctcgtgatacccagatcatatgaaacagcatgactttttcaagagtgccatgcccgaaggCATTGACACTCTTGAAAAAGTCAT	1	caatgcttctcgtgatacccagatcatatgaaacagc atgc atgactttttcaagagtg------cc c TACTGAAAAAGTTCTCACAGTTACggaagc	CAATGCTTCTCGTGATACCCAGATCATATGAAACAGC	0	37	37	ATGACTTTTTCAAGAGTG	37	55	18	CC	55	57	2	ATGCCCGAA	57	66	9	GG	66	68	2	CATTGA	68	74	6	CACTCTTGAAAAAGTCAT	74	92	18		92	92	0
363	caatgcttctcgtgatacccagatcatatgaaacagcatgactttttcaagagtgccatgcccgaaggGCAAGGCACTCTTGAAAAA	1	caatgcttctcgtgatacccagatcatatgaaacagcatgac atgcccg tttttcaagagtgcc a AAAAAGTTCTCACGGAACGgga	CAATGCTTCTCGTGATACCCAGATCATATGAAACAGCATGAC	0	42	42	TTTTTCAAGAGTGCC	42	57	15		57	57	0	ATGCCCGAAGG	57	68	11		68	68	0	GCAA	68	72	4	GGCACTCTTGAAAAA	72	87	15		87	87	0
364	caatgcttctcgtgatacccagatcatatgaaacagcatgactttttcaagagtgccatgcccgaaggGCATGGCGCTCTTGAAAAA	1	caatgcttctcgtgatacccagatcatatgaaacagcatgactttttcaagagt g gccatgccc a CGGTACGgga AAAAAGTTCTCG	CAATGCTTCTCGTGATACCCAGATCATATGAAACAGCATGACTTTTTCAAGAGT	0	54	54	GCCATGC	54	61	7	CC	61	63	2	GAA	63	66	3	GG	66	68	2		68	68	0	GCATGGC	68	75	7	GCTCTTGAAAAA	75	87	12
365	caatgcttctcgtgatacccagatcatatgaaacagcatgactttttcaagagtgccatgcccgaaggGTCATGCTGTTTCATACGATCTGGGTATCAC	1	caatgcttctcgtgatacccagatca tttttcaagagt tatgaaacagcatgac g ATACTTTGTCGTACTG c CACTATGGGTCTAGC ggaagcccgtac	CAATGCTTCTCGTGATACCCAGATCA	0	26	26	TATGAAACAGCATGAC	26	42	16		42	42	0	TTTTTCAAGAGTGCCATGCCCGAAGG	42	68	26		68	68	0		68	68	0	GTCATGCTGTTTCATA	68	84	16	CGATCTGGGTATCAC	84	99	15
366	caatgcttctcgtgatacccagatcatatgaaacagcatgactttttcaagagtgccatgcccgaaggTCATGCTGTTTCATATGATC	1	caatgcttctcgtgataccca tttttcaagagt gatcatatgaaacagcatgac g CTAGTATACTTTGTCGTACTggaagcccgtacc	CAATGCTTCTCGTGATACCCA	0	21	21	GATCATATGAAACAGCATGA	21	41	20	C	41	42	1	TTTTTCAAGAGTGCCATGCCCGAAG	42	67	25	G	67	68	1		68	68	0	TCATGCTGTTTCATATGATC	68	88	20		88	88	0
367	caatgcttctcgtgatacccagatcatatgaaacagcatgactttttcaagagtgccatgcccgaaggGTATGGCACTCTTGAAAAAGTCA	1	caatgcttctcgtgatacccagatcatatgaaacagca gcccg tgactttttcaagagtgccat a ACTGAAAAAGTTCTCACGGTATGgga	CAATGCTTCTCGTGATACCCAGATCATATGAAACAGCA	0	38	38	TGACTTTTTCAAGAGTGCCAT	38	59	21		59	59	0	GCCCGAAGG	59	68	9		68	68	0	GT	68	70	2	ATGGCACTCTTGAAAAAGTCA	70	91	21		91	91	0
368	caatgcttctcgtgatacccagatcatatgaaacagcatgactttttcaagagtgccatgcccgaaggGGTAAC	1	caatgcttctcgtga agatcatatgaaacagcatgact taccc t ATGGggaagcccgtaccgtgagaacttt CA	CAATGCTTCTCGTGA	0	15	15	TACC	15	19	4	C	19	20	1	AGATCATATGAAACAGCATGACTTTTTCAAGAGTGCCATGCCCGAAG	20	67	47	G	67	68	1		68	68	0	GGTA	68	72	4	AC	72	74	2
369	caatgcttctcgtgatacccagatcatatgaaacagcatgactttttcaagagtgccatgcccgaaggGTATCACGAGAGA	1	caatgct agatcatatgaaacagcatgac tctcgtgataccc t AGAGCACTATGgg t AG aagcccgtaccgtgagaacttt	CAATGCT	0	7	7	TCTCGTGATAC	7	18	11	CC	18	20	2	AGATCATATGAAACAGCATGACTTTTTCAAGAGTGCCATGCCCGAA	20	66	46	GG	66	68	2		68	68	0	GTATCACGAGA	68	79	11	GA	79	81	2
370	caatgcttctcgtgatacccagatcatatgaaacagcatgactttttcaagagtgccatgcccgaaggGGAAAG	1	caatgc tcgtgatacccagatcatatgaaacagca ttc t AAG g GA Gggaagcccgtaccgtgagaactttttca	CAATGC	0	6	6	TTC	6	9	3		9	9	0	TCGTGATACCCAGATCATATGAAACAGCATGACTTTTTCAAGAGTGCCATGCCCGAAGG	9	68	59		68	68	0	G	68	69	1	GAA	69	72	3	AG	72	74	2
371	caatgcttctcgtgatacccagatcatatgaaacagcatgactttttcaagagtgccatgcccgaaggGCAATACCTTCGGGCATGGCCCTTCGGGCA	1	caatgcttctcgtgatacccagatcatatgaaacagcatgactttttcaagagt GC gccatgcccgaagg A CGGTACGGGCTTCC A ACGGGCTTCC AT	CAATGCTTCTCGTGATACCCAGATCATATGAAACAGCATGACTTTTTCAAGAGT	0	54	54	GCCATGCCCGAAGG	54	68	14		68	68	0		68	68	0		68	68	0	GCAATA	68	74	6	CCTTCGGGCATGGC	74	88	14	CCTTCGGGCA	88	98	10
372	caatgcttctcgtgatacccagatcatatgaaacagcatgactttttcaagagtgccatgcccgaaggGCATGGCGCTCTTGAAAAAGTCATGC	1	caatgcttctcgtgatacccagatcatatgaaacagcatgactttttcaagagt g gccatgccc a CGGTACGgga CGTACTGAAAAAGTTCTCG	CAATGCTTCTCGTGATACCCAGATCATATGAAACAGCATGACTTTTTCAAGAGT	0	54	54	GCCATGC	54	61	7	CC	61	63	2	GAA	63	66	3	GG	66	68	2		68	68	0	GCATGGC	68	75	7	GCTCTTGAAAAAGTCATGC	75	94	19
373	caatgcttctcgtgatacccagatcatatgaaacagcatgactttttcaagagtgccatgcccgaaggGGCATGGCACTCTTGAAAAAGAC	1	caatgcttctcgtgatacccagatcatatgaaacagcatga g ctttttcaagagtgccatgccc a GAAAAAGTTCTCACGGTACGGg a CA g	CAATGCTTCTCGTGATACCCAGATCATATGAAACAGCATGA	0	41	41	CTTTTTCAAGAGTGCCATGCC	41	62	21	C	62	63	1	GAAG	63	67	4	G	67	68	1		68	68	0	GGCATGGCACTCTTGAAAAAG	68	89	21	AC	89	91	2
374	caatgcttctcgtgatacccagatcatatgaaacagcatgactttttcaagagtgccatgcccgaaggCCATGCTGTTTCATATGATCAA	1	caatgcttctcgtgataccca actttttcaagagt gatcatatgaaacagcatg g CTAGTATACTTTGTCGTACCggaagcccgtacc AA	CAATGCTTCTCGTGATACCCA	0	21	21	GATCATATGAAACAGCATG	21	40	19		40	40	0	ACTTTTTCAAGAGTGCCATGCCCGAAGG	40	68	28		68	68	0	C	68	69	1	CATGCTGTTTCATATGATC	69	88	19	AA	88	90	2
375	caatgcttctcgtgatacccagatcatatgaaacagcatgactttttcaagagtgccatgcccgaaggCCTGTCACTCTTGAAAAA	1	caatgcttctcgtgatacccagatcatatgaaacagcatgac atgc tttttcaagagtg-----cc c AAAAAGTTCTCACTGTCCggaagc	CAATGCTTCTCGTGATACCCAGATCATATGAAACAGCATGAC	0	42	42	TTTTTCAAGAGTG	42	55	13	CC	55	57	2	ATGCCCGAA	57	66	9	GG	66	68	2	CCTGT	68	73	5	CACTCTTGAAAAA	73	86	13		86	86	0
376	caatgcttctcgtgatacccagatcatatgaaacagcatgactttttcaagagtgccatgcccgaaggCATGGCACTCTTGAAGAAGT	1	caatgcttctcgtgatacccagatcatatgaaacagcatgacttt c ttcaagagtgccatgcc g AAGTTCTCACGGTACgg a TGAAG a	CAATGCTTCTCGTGATACCCAGATCATATGAAACAGCATGACTTT	0	45	45	TTCAAGAGTGCCATG	45	60	15	CC	60	62	2	CGAA	62	66	4	GG	66	68	2		68	68	0	CATGGCACTCTTGAA	68	83	15	GAAGT	83	88	5
377	caatgcttctcgtgatacccagatcatatgaaacagcatgactttttcaagagtgccatgcccgaaggGGCATGGCACTCATGAAA	1	caatgcttctcgtgatacccagatcatatgaaacagcatgactttttcaa g gagtgccatgccc a CTCACGGTACGGg a AAAGTA g	CAATGCTTCTCGTGATACCCAGATCATATGAAACAGCATGACTTTTTCAA	0	50	50	GAGTGCCATGCC	50	62	12	C	62	63	1	GAAG	63	67	4	G	67	68	1		68	68	0	GGCATGGCACTC	68	80	12	ATGAAA	80	86	6
378	caatgcttctcgtgatacccagatcatatgaaacagcatgactttttcaagagtgccatgcccgaaggGCATGGCACTCTTGAAAAT	1	caatgcttctcgtgatacccagatcatatgaaacagcatgact g ttttcaagagtgccatgccc a AAAAGTTCTCACGGTACGgga T	CAATGCTTCTCGTGATACCCAGATCATATGAAACAGCATGACT	0	43	43	TTTTCAAGAGTGCCATGC	43	61	18	CC	61	63	2	GAA	63	66	3	GG	66	68	2		68	68	0	GCATGGCACTCTTGAAAA	68	86	18	T	86	87	1
379	caatgcttctcgtgatacccagatcatatgaaacagcatgactttttcaagagtgccatgcccgaaggTCATGCTGTTTCACCT	1	caatgcttctcgtgatacccagatcata tttttcaagagt tgaaacagcatgac g ACTTTGTCGTACTggaagcccgtacc TCC	CAATGCTTCTCGTGATACCCAGATCATA	0	28	28	TGAAACAGCATGA	28	41	13	C	41	42	1	TTTTTCAAGAGTGCCATGCCCGAAG	42	67	25	G	67	68	1		68	68	0	TCATGCTGTTTCA	68	81	13	CCT	81	84	3
380	caatgcttctcgtgatacccagatcatatgaaacagcatgactttttcaagagtgccatgcccgaaggTCATGCTGTTTGA	1	caatgcttctcgtgatacccagatcatatg tttttcaagagt aaacagcatgac g TTTGTCGTACTggaagcccgtacc AG	CAATGCTTCTCGTGATACCCAGATCATATG	0	30	30	AAACAGCATGA	30	41	11	C	41	42	1	TTTTTCAAGAGTGCCATGCCCGAAG	42	67	25	G	67	68	1		68	68	0	TCATGCTGTTT	68	79	11	GA	79	81	2
381	caatgcttctcgtgatacccagatcatatgaaacagcatgactttttcaagagtgccatgcccgaaggCACTTCGGGCATGGCCTTCGGGCAT	1	caatgcttctcgtgatacccagatcatatgaaacagcatgactttttcaagagt g gccatgcccgaag C CGGTACGGGCTTCA TACGGGCTTC	CAATGCTTCTCGTGATACCCAGATCATATGAAACAGCATGACTTTTTCAAGAGT	0	54	54	GCCATGCCCGAAG	54	67	13		67	67	0	G	67	68	1		68	68	0	CA	68	70	2	CTTCGGGCATGGC	70	83	13	CTTCGGGCAT	83	93	10
382	caatgcttctcgtgatacccagatcatatgaaacagcatgactttttcaagagtgccatgcccgaaggCCCTCTTGAAAAAGTCATGCTGTTTCATAT	1	caatgcttctcgtgatacccagatc tgccatgc atatgaaacagcatgactttttcaagag c TATACTTTGTCGTACTGAAAAAGTTCTCCCggaagc	CAATGCTTCTCGTGATACCCAGATC	0	25	25	ATATGAAACAGCATGACTTTTTCAAGAG	25	53	28		53	53	0	TGCCATGCCCGAAGG	53	68	15		68	68	0	CC	68	70	2	CTCTTGAAAAAGTCATGCTGTTTCATAT	70	98	28		98	98	0
383	caatgcttctcgtgatacccagatcatatgaaacagcatgactttttcaagagtgccatgcccgaaggGCATGGCAACTC	1	caatgcttctcgtgatacccagatcatatgaaacagcatgactttttcaagag g tgccatgccc a ACGGTACGgga CTCA	CAATGCTTCTCGTGATACCCAGATCATATGAAACAGCATGACTTTTTCAAGAG	0	53	53	TGCCATGC	53	61	8	CC	61	63	2	GAA	63	66	3	GG	66	68	2		68	68	0	GCATGGCA	68	76	8	ACTC	76	80	4
384	caatgcttctcgtgatacccagatcatatgaaacagcatgactttttcaagagtgccatgcccgaaggGGCACGGCACTCTTGAAAAAGTCT	1	caatgcttctcgtgatacccagatcatatgaaacagcat atgcccg gactttttcaagagtgcc a CTGAAAAAGTTCTCACGG a T CACGGgg	CAATGCTTCTCGTGATACCCAGATCATATGAAACAGCAT	0	39	39	GACTTTTTCAAGAGTGCC	39	57	18		57	57	0	ATGCCCGAAGG	57	68	11		68	68	0	GGCAC	68	73	5	GGCACTCTTGAAAAAGTC	73	91	18	T	91	92	1
385	caatgcttctcgtgatacccagatcatatgaaacagcatgactttttcaagagtgccatgcccgaaggCCTCTTGAAAAAGTCATGCTGTTTCATATGAT	1	caatgcttctcgtgatacccag tgccatg atcatatgaaacagcatgactttttcaagag c TAGTATACTTTGTCGTACTGAAAAAGTTCTC c Cggaagc	CAATGCTTCTCGTGATACCCAG	0	22	22	ATCATATGAAACAGCATGACTTTTTCAAGAG	22	53	31		53	53	0	TGCCATGCCCGAAGG	53	68	15		68	68	0	C	68	69	1	CTCTTGAAAAAGTCATGCTGTTTCATATGAT	69	100	31		100	100	0
386	caatgcttctcgtgatacccagatcatatgaaacagcatgactttttcaagagtgccatgcccgaaggCACTCTTGAAAT	1	caatgcttctcgtgatacccagatcatatgaaacagcatgactt atgc tttcaagagtgcc c AAAGTTCTCACggaagc T	CAATGCTTCTCGTGATACCCAGATCATATGAAACAGCATGACTT	0	44	44	TTTCAAGAGTG	44	55	11	CC	55	57	2	ATGCCCGAA	57	66	9	GG	66	68	2		68	68	0	CACTCTTGAAA	68	79	11	T	79	80	1
387	caatgcttctcgtgatacccagatcatatgaaacagcatgactttttcaagagtgccatgcccgaaggCCATGGCACTCTTGAAAAA	1	caatgcttctcgtgatacccagatcatatgaaacagcatgac c tttttcaagagtgccatg-cc g AAAAAGTTCTCACGGTACCgg a a	CAATGCTTCTCGTGATACCCAGATCATATGAAACAGCATGAC	0	42	42	TTTTTCAAGAGTGCCATG	42	60	18	CC	60	62	2	CGAA	62	66	4	GG	66	68	2	C	68	69	1	CATGGCACTCTTGAAAAA	69	87	18		87	87	0
388	caatgcttctcgtgatacccagatcatatgaaacagcatgactttttcaagagtgccatgcccgaaggGCACTCTTGAGAAA	1	caatgcttctcgtgatacccagatcatatgaaacagcatgactttt atgc tcaagagtgcc c AGTTCTCACGg c AAAG gaag	CAATGCTTCTCGTGATACCCAGATCATATGAAACAGCATGACTTTT	0	46	46	TCAAGAGTGC	46	56	10	C	56	57	1	ATGCCCGAAG	57	67	10	G	67	68	1		68	68	0	GCACTCTTGA	68	78	10	GAAA	78	82	4
389	caatgcttctcgtgatacccagatcatatgaaacagcatgactttttcaagagtgccatgcccgaaggGGCATGGCACTCCTGAAAAAGT	1	caatgcttctcgtgatacccagatcatatgaaacagcatgactttttcaa g gagtgccatgccc a CTCACGGTACGGg a TGAAAAAGTC g	CAATGCTTCTCGTGATACCCAGATCATATGAAACAGCATGACTTTTTCAA	0	50	50	GAGTGCCATGCC	50	62	12	C	62	63	1	GAAG	63	67	4	G	67	68	1		68	68	0	GGCATGGCACTC	68	80	12	CTGAAAAAGT	80	90	10
390	caatgcttctcgtgatacccagatcatatgaaacagcatgactttttcaagagtgccatgcccgaaggGTCAA	1	caatgcttctcgtgatacccagatcatatgaaacagca tttttcaagagt tgac g ACTG c A ggaagcccgtac	CAATGCTTCTCGTGATACCCAGATCATATGAAACAGCA	0	38	38	TGAC	38	42	4		42	42	0	TTTTTCAAGAGTGCCATGCCCGAAGG	42	68	26		68	68	0		68	68	0	GTCA	68	72	4	A	72	73	1
391	caatgcttctcgtgatacccagatcatatgaaacagcatgactttttcaagagtgccatgcccgaaggGCAGGCCCCA	1	caatgcttctcgtgatacccagatcatatgaaacagcatgactttttcaagagtgcca g tgccc a ACGgga ACCCCGG	CAATGCTTCTCGTGATACCCAGATCATATGAAACAGCATGACTTTTTCAAGAGTGCCA	0	58	58	TGC	58	61	3	CC	61	63	2	GAA	63	66	3	GG	66	68	2		68	68	0	GCA	68	71	3	GGCCCCA	71	78	7
392	caatgcttctcgtgatacccagatcatatgaaacagcatgactttttcaagagtgccatgcccgaaggTCATGC	1	caatgcttctcgtgatacccagatcatatgaaaca tttttcaagagt gcatgac g CGTACTggaagcccgtacc	CAATGCTTCTCGTGATACCCAGATCATATGAAACA	0	35	35	GCATGA	35	41	6	C	41	42	1	TTTTTCAAGAGTGCCATGCCCGAAG	42	67	25	G	67	68	1		68	68	0	TCATGC	68	74	6		74	74	0
393	caatgcttctcgtgatacccagatcatatgaaacagcatgactttttcaagagtgccatgcccgaaggTCATGCTGTTTCATGACCTTCGGGCG	1	caatgcttctcgtgatacccagatcat tttttcaagagt atgaaacagcatgac g TACTTTGTCGTACTggaagcccgtacc GCGGGCTTCCAG	CAATGCTTCTCGTGATACCCAGATCAT	0	27	27	ATGAAACAGCATGA	27	41	14	C	41	42	1	TTTTTCAAGAGTGCCATGCCCGAAG	42	67	25	G	67	68	1		68	68	0	TCATGCTGTTTCAT	68	82	14	GACCTTCGGGCG	82	94	12
394	caatgcttctcgtgatacccagatcatatgaaacagcatgactttttcaagagtgccatgcccgaaggGTCATGGCACTCTTGAAAAAG	1	caatgcttctcgtgatacccagatcatatgaaacagcatga c ctttttcaagagtgccatg--cc g GAAAAAGTTCTCACGGTACTGgg a a	CAATGCTTCTCGTGATACCCAGATCATATGAAACAGCATGA	0	41	41	CTTTTTCAAGAGTGCCATG	41	60	19	CC	60	62	2	CGAA	62	66	4	GG	66	68	2	GT	68	70	2	CATGGCACTCTTGAAAAAG	70	89	19		89	89	0
395	caatgcttctcgtgatacccagatcatatgaaacagcatgactttttcaagagtgccatgcccgaaggGGGTCAGATCACGAGAAGC	1	caatgcttctcgtgat agatcatatgaaacagcatgact accc t TGGG t CGAAGAGCACTAGAC ggaagcccgtaccgtgagaactt	CAATGCTTCTCGTGAT	0	16	16	ACCC	16	20	4		20	20	0	AGATCATATGAAACAGCATGACTTTTTCAAGAGTGCCATGCCCGAAGG	20	68	48		68	68	0		68	68	0	GGGT	68	72	4	CAGATCACGAGAAGC	72	87	15
396	caatgcttctcgtgatacccagatcatatgaaacagcatgactttttcaagagtgccatgcccgaaggGTCATGCTGTTTTCA	1	caatgcttctcgtgatacccagatcatatg tttttcaagagt aaacagcatgac g TTTGTCGTACTG c ACT ggaagcccgtac	CAATGCTTCTCGTGATACCCAGATCATATG	0	30	30	AAACAGCATGAC	30	42	12		42	42	0	TTTTTCAAGAGTGCCATGCCCGAAGG	42	68	26		68	68	0		68	68	0	GTCATGCTGTTT	68	80	12	TCA	80	83	3
397	caatgcttctcgtgatacccagatcatatgaaacagcatgactttttcaagagtgccatgcccgaaggCCATGCTGTTTCATATGATCAGGGTAT	1	caatgcttctcgtgataccca actttttcaagagt gatcatatgaaacagcatg g CTAGTATACTTTGTCGTACCggaagcccgtacc TATGGGA	CAATGCTTCTCGTGATACCCA	0	21	21	GATCATATGAAACAGCATG	21	40	19		40	40	0	ACTTTTTCAAGAGTGCCATGCCCGAAGG	40	68	28		68	68	0	C	68	69	1	CATGCTGTTTCATATGATC	69	88	19	AGGGTAT	88	95	7
398	caatgcttctcgtgatacccagatcatatgaaacagcatgactttttcaagagtgccatgcccgaaggCATTGAAGC	1	ttctcgtgatacccagatcatatgaaacag caatgc c GTTACggaagcccgtaccgtgagaactttttcagta CGAA		0	0	0	CAATG	0	5	5	C	5	6	1	TTCTCGTGATACCCAGATCATATGAAACAGCATGACTTTTTCAAGAGTGCCATGCCCGAAG	6	67	61	G	67	68	1		68	68	0	CATTG	68	73	5	AAGC	73	77	4
399	caatgcttctcgtgatacccagatcatatgaaacagcatgactttttcaagagtgccatgcccgaaggCATGGCACTCTTGAAAAG	1	caatgcttctcgtgatacccagatcatatgaaacagcatgact c ttttcaagagtgccatgcc g AAAAGTTCTCACGGTACgg a G a	CAATGCTTCTCGTGATACCCAGATCATATGAAACAGCATGACT	0	43	43	TTTTCAAGAGTGCCATG	43	60	17	CC	60	62	2	CGAA	62	66	4	GG	66	68	2		68	68	0	CATGGCACTCTTGAAAA	68	85	17	G	85	86	1
400	caatgcttctcgtgatacccagatcatatgaaacagcatgactttttcaagagtgccatgcccgaaggGTCAATGC	1	caatgcttctcgtgatacccagatcatatgaaacagca tttttcaagagt tgac g ACTG c CGTA ggaagcccgtac	CAATGCTTCTCGTGATACCCAGATCATATGAAACAGCA	0	38	38	TGAC	38	42	4		42	42	0	TTTTTCAAGAGTGCCATGCCCGAAGG	42	68	26		68	68	0		68	68	0	GTCA	68	72	4	ATGC	72	76	4
401	caatgcttctcgtgatacccagatcatatgaaacagcatgactttttcaagagtgccatgcccgaaggCATTGAAG	1	ttctcgtgatacccagatcatatgaaacag caatgc c GTTACggaagcccgtaccgtgagaactttttcagta GAA		0	0	0	CAATG	0	5	5	C	5	6	1	TTCTCGTGATACCCAGATCATATGAAACAGCATGACTTTTTCAAGAGTGCCATGCCCGAAG	6	67	61	G	67	68	1		68	68	0	CATTG	68	73	5	AAG	73	76	3
402	caatgcttctcgtgatacccagatcatatgaaacagcatgactttttcaagagtgccatgcccgaaggTCATGCTGTTTCATATGATCTGGGTATCA	1	caatgcttctcg tttttcaagagt tgatacccagatcatatgaaacagcatgac g ACTATGGGTCTAGTATACTTTGTCGTACTggaagcccgtacc	CAATGCTTCTCG	0	12	12	TGATACCCAGATCATATGAAACAGCATGA	12	41	29	C	41	42	1	TTTTTCAAGAGTGCCATGCCCGAAG	42	67	25	G	67	68	1		68	68	0	TCATGCTGTTTCATATGATCTGGGTATCA	68	97	29		97	97	0
403	caatgcttctcgtgatacccagatcatatgaaacagcatgactttttcaagagtgccatgcccgaaggGAGAAGAATT	1	caatg gtgatacccagatcatatgaaacagcat cttctc g GAAGAGggaagcccgtaccgtgagaactttttca TTAA	CAATG	0	5	5	CTTCTC	5	11	6		11	11	0	GTGATACCCAGATCATATGAAACAGCATGACTTTTTCAAGAGTGCCATGCCCGAAGG	11	68	57		68	68	0		68	68	0	GAGAAG	68	74	6	AATT	74	78	4
404	caatgcttctcgtgatacccagatcatatgaaacagcatgactttttcaagagtgccatgcccgaaggCATTGAACCTTCGGGCAT	1	caatgcttctcgtgatacccagatcatatgaaacagcatgactttttcaagagtgcc CAT atgcccgaagg T TACGGGCTTCCAAG	CAATGCTTCTCGTGATACCCAGATCATATGAAACAGCATGACTTTTTCAAGAGTGCC	0	57	57	ATGCCCGAAGG	57	68	11		68	68	0		68	68	0		68	68	0	CATTGAA	68	75	7	CCTTCGGGCAT	75	86	11		86	86	0
405	caatgcttctcgtgatacccagatcatatgaaacagcatgactttttcaagagtgccatgcccgaaggGCATCAC	1	caatgcttctcgtgatacccagatcatatgaaacagcatgactttttcaagagtgcc g atgccc a TACGgga CAC	CAATGCTTCTCGTGATACCCAGATCATATGAAACAGCATGACTTTTTCAAGAGTGCC	0	57	57	ATGC	57	61	4	CC	61	63	2	GAA	63	66	3	GG	66	68	2		68	68	0	GCAT	68	72	4	CAC	72	75	3
406	caatgcttctcgtgatacccagatcatatgaaacagcatgactttttcaagagtgccatgcccgaaggGTCCAATGCTTC	1	caatgcttctcgtgat agatcatatgaaacagcatgac accc t TGgg t CTTCGTAACC aagcccgtaccgtgagaacttt	CAATGCTTCTCGTGAT	0	16	16	AC	16	18	2	CC	18	20	2	AGATCATATGAAACAGCATGACTTTTTCAAGAGTGCCATGCCCGAA	20	66	46	GG	66	68	2		68	68	0	GT	68	70	2	CCAATGCTTC	70	80	10
407	caatgcttctcgtgatacccagatcatatgaaacagcatgactttttcaagagtgccatgcccgaaggCCCTCTTGAAAAAGAGGGCCTTCT	1	caatgcttctcgtgatacccagatcatatgaaacagcatga tgccatgc ctttttcaagag c GAAAAAGTTCTCCCggaagc TCTTCCGGGA	CAATGCTTCTCGTGATACCCAGATCATATGAAACAGCATGA	0	41	41	CTTTTTCAAGAG	41	53	12		53	53	0	TGCCATGCCCGAAGG	53	68	15		68	68	0	CC	68	70	2	CTCTTGAAAAAG	70	82	12	AGGGCCTTCT	82	92	10
408	caatgcttctcgtgatacccagatcatatgaaacagcatgactttttcaagagtgccatgcccgaaggCCTGGCACTCTTGAAAGTCATGCTGTT	1	caatgcttctcgtgatacccagatcatatgaaacagcatgactt tgccc tttcaagagtgcca g AAAGTTCTCACGGT a TTGTCGTACTG CCgga	CAATGCTTCTCGTGATACCCAGATCATATGAAACAGCATGACTT	0	44	44	TTTCAAGAGTGCCA	44	58	14		58	58	0	TGCCCGAAGG	58	68	10		68	68	0	CC	68	70	2	TGGCACTCTTGAAA	70	84	14	GTCATGCTGTT	84	95	11
409	caatgcttctcgtgatacccagatcatatgaaacagcatgactttttcaagagtgccatgcccgaaggTCATGCTGTC	1	caatgcttctcgtgatacccagatcatatgaa tttttcaagagt acagcatgac g TGTCGTACTggaagcccgtacc C	CAATGCTTCTCGTGATACCCAGATCATATGAA	0	32	32	ACAGCATGA	32	41	9	C	41	42	1	TTTTTCAAGAGTGCCATGCCCGAAG	42	67	25	G	67	68	1		68	68	0	TCATGCTGT	68	77	9	C	77	78	1
410	caatgcttctcgtgatacccagatcatatgaaacagcatgactttttcaagagtgccatgcccgaaggGTCATGGCATGGCACTC	1	caatgcttctcgtgatacccagatcatatgaaacag tttttcaagagt catgac g GTACTG c CTCACGGTACG ggaagcccgtac	CAATGCTTCTCGTGATACCCAGATCATATGAAACAG	0	36	36	CATGAC	36	42	6		42	42	0	TTTTTCAAGAGTGCCATGCCCGAAGG	42	68	26		68	68	0		68	68	0	GTCATG	68	74	6	GCATGGCACTC	74	85	11
411	caatgcttctcgtgatacccagatcatatgaaacagcatgactttttcaagagtgccatgcccgaaggCACTCTTTTTCAAGAGT	1	caatgcttctcgtgatacccagatcatatgaaacagcatgactttttc atgc aagagtgcc c TTCTCACggaagc TGAGAACTTT	CAATGCTTCTCGTGATACCCAGATCATATGAAACAGCATGACTTTTTC	0	48	48	AAGAGTG	48	55	7	CC	55	57	2	ATGCCCGAA	57	66	9	GG	66	68	2		68	68	0	CACTCTT	68	75	7	TTTCAAGAGT	75	85	10
412	caatgcttctcgtgatacccagatcatatgaaacagcatgactttttcaagagtgccatgcccgaaggCAATGCTTCTCCC	1	caatgcttctcgtgatacccagatcatatgaaacagcatgactttttcaagagtgcca c tgcc g ACgg a CCCTCTTCGTA a	CAATGCTTCTCGTGATACCCAGATCATATGAAACAGCATGACTTTTTCAAGAGTGCCA	0	58	58	TG	58	60	2	CC	60	62	2	CGAA	62	66	4	GG	66	68	2		68	68	0	CA	68	70	2	ATGCTTCTCCC	70	81	11
413	caatgcttctcgtgatacccagatcatatgaaacagcatgactttttcaagagtgccatgcccgaaggGCACG	1	caatgcttctcgtgatacccagatcatatgaaacagcatgactttttcaaga atgc gtgcc c CACGg c G gaag	CAATGCTTCTCGTGATACCCAGATCATATGAAACAGCATGACTTTTTCAAGA	0	52	52	GTGC	52	56	4	C	56	57	1	ATGCCCGAAG	57	67	10	G	67	68	1		68	68	0	GCAC	68	72	4	G	72	73	1
414	caatgcttctcgtgatacccagatcatatgaaacagcatgactttttcaagagtgccatgcccgaaggGCATGCCACTCTTGAAAAA	1	caatgcttctcgtgatacccagatcatatgaaacagcatgactttttcaagagtgc g catgccc a GTACGgga AAAAAGTTCTCACC	CAATGCTTCTCGTGATACCCAGATCATATGAAACAGCATGACTTTTTCAAGAGTGC	0	56	56	CATGC	56	61	5	CC	61	63	2	GAA	63	66	3	GG	66	68	2		68	68	0	GCATG	68	73	5	CCACTCTTGAAAAA	73	87	14
415	caatgcttctcgtgatacccagatcatatgaaacagcatgactttttcaagagtgccatgcccgaaggTCATGCTGTTTCATAAACAGCATGACC	1	caatgcttctcgtgatacccagatca tttttcaagagt tatgaaacagcatgac g ATACTTTGTCGTACTggaagcccgtacc CCAGTACGACAA	CAATGCTTCTCGTGATACCCAGATCA	0	26	26	TATGAAACAGCATGA	26	41	15	C	41	42	1	TTTTTCAAGAGTGCCATGCCCGAAG	42	67	25	G	67	68	1		68	68	0	TCATGCTGTTTCATA	68	83	15	AACAGCATGACC	83	95	12
416	caatgcttctcgtgatacccagatcatatgaaacagcatgactttttcaagagtgccatgcccgaaggTCATGCTGTTTCATC	1	caatgcttctcgtgatacccagatcat tttttcaagagt atgaaacagcatgac g TACTTTGTCGTACTggaagcccgtacc C	CAATGCTTCTCGTGATACCCAGATCAT	0	27	27	ATGAAACAGCATGA	27	41	14	C	41	42	1	TTTTTCAAGAGTGCCATGCCCGAAG	42	67	25	G	67	68	1		68	68	0	TCATGCTGTTTCAT	68	82	14	C	82	83	1
417	caatgcttctcgtgatacccagatcatatgaaacagcatgactttttcaagagtgccatgcccgaaggTCATGCTGTTTCC	1	caatgcttctcgtgatacccagatcatat tttttcaagagt gaaacagcatgac g CTTTGTCGTACTggaagcccgtacc C	CAATGCTTCTCGTGATACCCAGATCATAT	0	29	29	GAAACAGCATGA	29	41	12	C	41	42	1	TTTTTCAAGAGTGCCATGCCCGAAG	42	67	25	G	67	68	1		68	68	0	TCATGCTGTTTC	68	80	12	C	80	81	1
418	caatgcttctcgtgatacccagatcatatgaaacagcatgactttttcaagagtgccatgcccgaaggCCATGCTGTTTCATG	1	caatgcttctcgtgatacccagatcat actttttcaagagt atgaaacagcatg g TACTTTGTCGTACCggaagcccgtacc G	CAATGCTTCTCGTGATACCCAGATCAT	0	27	27	ATGAAACAGCATG	27	40	13		40	40	0	ACTTTTTCAAGAGTGCCATGCCCGAAGG	40	68	28		68	68	0	C	68	69	1	CATGCTGTTTCAT	69	82	13	G	82	83	1
419	caatgcttctcgtgatacccagatcatatgaaacagcatgactttttcaagagtgccatgcccgaaggCATGGCACTCTTGAAAAAA	1	caatgcttctcgtgatacccagatcatatgaaacagcatgac c tttttcaagagtgccatgcc g AAAAAGTTCTCACGGTACgg a A a	CAATGCTTCTCGTGATACCCAGATCATATGAAACAGCATGAC	0	42	42	TTTTTCAAGAGTGCCATG	42	60	18	CC	60	62	2	CGAA	62	66	4	GG	66	68	2		68	68	0	CATGGCACTCTTGAAAAA	68	86	18	A	86	87	1
420	caatgcttctcgtgatacccagatcatatgaaacagcatgactttttcaagagtgccatgcccgaaggCACTCTTGAGAAA	1	caatgcttctcgtgatacccagatcatatgaaacagcatgactttt atgc tcaagagtgcc c AGTTCTCACggaagc AAAG	CAATGCTTCTCGTGATACCCAGATCATATGAAACAGCATGACTTTT	0	46	46	TCAAGAGTG	46	55	9	CC	55	57	2	ATGCCCGAA	57	66	9	GG	66	68	2		68	68	0	CACTCTTGA	68	77	9	GAAA	77	81	4
421	caatgcttctcgtgatacccagatcatatgaaacagcatgactttttcaagagtgccatgcccgaaggGCAGGAG	1	caatgcttctcgtgatacccagatcatatgaaacagcatgactttttcaagagtgcca g tgccc a ACGgga GAGG	CAATGCTTCTCGTGATACCCAGATCATATGAAACAGCATGACTTTTTCAAGAGTGCCA	0	58	58	TGC	58	61	3	CC	61	63	2	GAA	63	66	3	GG	66	68	2		68	68	0	GCA	68	71	3	GGAG	71	75	4
422	caatgcttctcgtgatacccagatcatatgaaacagcatgactttttcaagagtgccatgcccgaaggGTATCACGAGAAGCATTGAG	1	agatcatatgaaacagcatgac caatgcttctcgtgataccc t GTTACGAAGAGCACTATGgg t GA aagcccgtaccgtgagaacttt		0	0	0	CAATGCTTCTCGTGATAC	0	18	18	CC	18	20	2	AGATCATATGAAACAGCATGACTTTTTCAAGAGTGCCATGCCCGAA	20	66	46	GG	66	68	2		68	68	0	GTATCACGAGAAGCATTG	68	86	18	AG	86	88	2
423	caatgcttctcgtgatacccagatcatatgaaacagcatgactttttcaagagtgccatgcccgaaggCACTCTTGAAAAAGTCATGC	1	caatgcttctcgtgatacccagatcatatgaaaca atgc gcatgactttttcaagagtgcc c CGTACTGAAAAAGTTCTCACggaagc	CAATGCTTCTCGTGATACCCAGATCATATGAAACA	0	35	35	GCATGACTTTTTCAAGAGTG	35	55	20	CC	55	57	2	ATGCCCGAA	57	66	9	GG	66	68	2		68	68	0	CACTCTTGAAAAAGTCATGC	68	88	20		88	88	0
424	caatgcttctcgtgatacccagatcatatgaaacagcatgactttttcaagagtgccatgcccgaaggGCATGGCACTCTTGAAAG	1	caatgcttctcgtgatacccagatcatatgaaacagcatgactt g tttcaagagtgccatgccc a AAAGTTCTCACGGTACGgga G	CAATGCTTCTCGTGATACCCAGATCATATGAAACAGCATGACTT	0	44	44	TTTCAAGAGTGCCATGC	44	61	17	CC	61	63	2	GAA	63	66	3	GG	66	68	2		68	68	0	GCATGGCACTCTTGAAA	68	85	17	G	85	86	1
425	caatgcttctcgtgatacccagatcatatgaaacagcatgactttttcaagagtgccatgcccgaaggTCAT	1	caatgcttctcgtgatacccagatcatatgaaacagc tttttcaagagt atgac g TACTggaagcccgtacc	CAATGCTTCTCGTGATACCCAGATCATATGAAACAGC	0	37	37	ATGA	37	41	4	C	41	42	1	TTTTTCAAGAGTGCCATGCCCGAAG	42	67	25	G	67	68	1		68	68	0	TCAT	68	72	4		72	72	0
426	caatgcttctcgtgatacccagatcatatgaaacagcatgactttttcaagagtgccatgcccgaaggGGGTATCACT	1	caatgcttctc agatcatatgaaacagcatgact gtgataccc t CACTATGGG t T ggaagcccgtaccgtgagaactt	CAATGCTTCTC	0	11	11	GTGATACCC	11	20	9		20	20	0	AGATCATATGAAACAGCATGACTTTTTCAAGAGTGCCATGCCCGAAGG	20	68	48		68	68	0		68	68	0	GGGTATCAC	68	77	9	T	77	78	1
427	caatgcttctcgtgatacccagatcatatgaaacagcatgactttttcaagagtgccatgcccgaaggGGCATGGCACTCTTGAAAAGTCGTGCT	1	caatgcttctcgtgatacccagatcatatgaaacagcatgact g ttttcaagagtgccatgccc a AAAAGTTCTCACGGTACGGg a TCGTGCTG g	CAATGCTTCTCGTGATACCCAGATCATATGAAACAGCATGACT	0	43	43	TTTTCAAGAGTGCCATGCC	43	62	19	C	62	63	1	GAAG	63	67	4	G	67	68	1		68	68	0	GGCATGGCACTCTTGAAAA	68	87	19	GTCGTGCT	87	95	8
428	caatgcttctcgtgatacccagatcatatgaaacagcatgactttttcaagagtgccatgcccgaaggGGGT	1	caatgcttctcgtgat agatcatatgaaacagcatgact accc t TGGG t ggaagcccgtaccgtgagaactt	CAATGCTTCTCGTGAT	0	16	16	ACCC	16	20	4		20	20	0	AGATCATATGAAACAGCATGACTTTTTCAAGAGTGCCATGCCCGAAGG	20	68	48		68	68	0		68	68	0	GGGT	68	72	4		72	72	0
429	caatgcttctcgtgatacccagatcatatgaaacagcatgactttttcaagagtgccatgcccgaaggTCATGCTGTTTCATAC	1	caatgcttctcgtgatacccagatca tttttcaagagt tatgaaacagcatgac g ATACTTTGTCGTACTggaagcccgtacc C	CAATGCTTCTCGTGATACCCAGATCA	0	26	26	TATGAAACAGCATGA	26	41	15	C	41	42	1	TTTTTCAAGAGTGCCATGCCCGAAG	42	67	25	G	67	68	1		68	68	0	TCATGCTGTTTCATA	68	83	15	C	83	84	1
430	caatgcttctcgtgatacccagatcatatgaaacagcatgactttttcaagagtgccatgcccgaaggGGCATGGCACG	1	caatgcttctcgtgatacccagatcatatgaaacagcatgactttttcaaga g gtgccatgccc a CACGGTACGGg a G g	CAATGCTTCTCGTGATACCCAGATCATATGAAACAGCATGACTTTTTCAAGA	0	52	52	GTGCCATGCC	52	62	10	C	62	63	1	GAAG	63	67	4	G	67	68	1		68	68	0	GGCATGGCAC	68	78	10	G	78	79	1
431	caatgcttctcgtgatacccagatcatatgaaacagcatgactttttcaagagtgccatgcccgaaggGCATTGAA	1	ttctcgtgatacccagatcatatgaaacag caatgc c GTTACG a AA ggaagcccgtaccgtgagaactttttcagt		0	0	0	CAATGC	0	6	6		6	6	0	TTCTCGTGATACCCAGATCATATGAAACAGCATGACTTTTTCAAGAGTGCCATGCCCGAAGG	6	68	62		68	68	0		68	68	0	GCATTG	68	74	6	AA	74	76	2
432	caatgcttctcgtgatacccagatcatatgaaacagcatgactttttcaagagtgccatgcccgaaggTCATGCTGTTTCATAAGATC	1	caatgcttctcgtgatacccagatca tttttcaagagt tatgaaacagcatgac g ATACTTTGTCGTACTggaagcccgtacc CTAGA	CAATGCTTCTCGTGATACCCAGATCA	0	26	26	TATGAAACAGCATGA	26	41	15	C	41	42	1	TTTTTCAAGAGTGCCATGCCCGAAG	42	67	25	G	67	68	1		68	68	0	TCATGCTGTTTCATA	68	83	15	AGATC	83	88	5
433	caatgcttctcgtgatacccagatcatatgaaacagcatgactttttcaagagtgccatgcccgaaggGTATCACGAGATACCCTTCGGGC	1	caatgct agatcatatgaaacagcatgac tctcgtgataccc t AGAGCACTATGgg t CGGGCTTCCCAT aagcccgtaccgtgagaacttt	CAATGCT	0	7	7	TCTCGTGATAC	7	18	11	CC	18	20	2	AGATCATATGAAACAGCATGACTTTTTCAAGAGTGCCATGCCCGAA	20	66	46	GG	66	68	2		68	68	0	GTATCACGAGA	68	79	11	TACCCTTCGGGC	79	91	12
434	caatgcttctcgtgatacccagatcatatgaaacagcatgactttttcaagagtgccatgcccgaaggTCATGCTGTTTCATAAG	1	caatgcttctcgtgatacccagatca tttttcaagagt tatgaaacagcatgac g ATACTTTGTCGTACTggaagcccgtacc GA	CAATGCTTCTCGTGATACCCAGATCA	0	26	26	TATGAAACAGCATGA	26	41	15	C	41	42	1	TTTTTCAAGAGTGCCATGCCCGAAG	42	67	25	G	67	68	1		68	68	0	TCATGCTGTTTCATA	68	83	15	AG	83	85	2
435	caatgcttctcgtgatacccagatcatatgaaacagcatgactttttcaagagtgccatgcccgaaggGCATGGCACTCTTGAAAAAGTCC	1	caatgcttctcgtgatacccagatcatatgaaacagcat g gactttttcaagagtgccatgccc a CTGAAAAAGTTCTCACGGTACGgga C	CAATGCTTCTCGTGATACCCAGATCATATGAAACAGCAT	0	39	39	GACTTTTTCAAGAGTGCCATGC	39	61	22	CC	61	63	2	GAA	63	66	3	GG	66	68	2		68	68	0	GCATGGCACTCTTGAAAAAGTC	68	90	22	C	90	91	1
436	caatgcttctcgtgatacccagatcatatgaaacagcatgactttttcaagagtgccatgcccgaaggCACTCTTGAAAAGTCATGCTGTTATGCATGACTTTTCAAGAGTG	1	caatgcttctcgtgatacccagatcatatgaaacagcatgact atgc ttttcaagagtgcc c AAAAGTTCTCACggaagc GTGAGAACTTTTCAGTACGTATTGTCGTACTG	CAATGCTTCTCGTGATACCCAGATCATATGAAACAGCATGACT	0	43	43	TTTTCAAGAGTG	43	55	12	CC	55	57	2	ATGCCCGAA	57	66	9	GG	66	68	2		68	68	0	CACTCTTGAAAA	68	80	12	GTCATGCTGTTATGCATGACTTTTCAAGAGTG	80	112	32
437	caatgcttctcgtgatacccagatcatatgaaacagcatgactttttcaagagtgccatgcccgaaggGTCAT	1	caatgcttctcgtgatacccagatcatatgaaacagc tttttcaagagt atgac g TACTG c ggaagcccgtac	CAATGCTTCTCGTGATACCCAGATCATATGAAACAGC	0	37	37	ATGAC	37	42	5		42	42	0	TTTTTCAAGAGTGCCATGCCCGAAGG	42	68	26		68	68	0		68	68	0	GTCAT	68	73	5		73	73	0
438	caatgcttctcgtgatacccagatcatatgaaacagcatgactttttcaagagtgccatgcccgaaggCCAGATCATAT	1	caatgcttctcgtgatacccagatcatatgaaacagcatgactttttcaagagtgcca c tg-cc g ACCgg a TATACTAG a	CAATGCTTCTCGTGATACCCAGATCATATGAAACAGCATGACTTTTTCAAGAGTGCCA	0	58	58	TG	58	60	2	CC	60	62	2	CGAA	62	66	4	GG	66	68	2	C	68	69	1	CA	69	71	2	GATCATAT	71	79	8
439	caatgcttctcgtgatacccagatcatatgaaacagcatgactttttcaagagtgccatgcccgaaggGTCATGCTGATTCATATGATCAGCATGACCCTTCGGGC	1	caatgcttctcgtgatacccagatcatatgaaa tttttcaagagt cagcatgac g GTCGTACTG c CGGGCTTCCCAGTACGACTAGTATACTTA ggaagcccgtac	CAATGCTTCTCGTGATACCCAGATCATATGAAA	0	33	33	CAGCATGAC	33	42	9		42	42	0	TTTTTCAAGAGTGCCATGCCCGAAGG	42	68	26		68	68	0		68	68	0	GTCATGCTG	68	77	9	ATTCATATGATCAGCATGACCCTTCGGGC	77	106	29
440	caatgcttctcgtgatacccagatcatatgaaacagcatgactttttcaagagtgccatgcccgaaggGCATGGCGC	1	caatgcttctcgtgatacccagatcatatgaaacagcatgactttttcaagagt g gccatgccc a CGGTACGgga CG	CAATGCTTCTCGTGATACCCAGATCATATGAAACAGCATGACTTTTTCAAGAGT	0	54	54	GCCATGC	54	61	7	CC	61	63	2	GAA	63	66	3	GG	66	68	2		68	68	0	GCATGGC	68	75	7	GC	75	77	2
441	caatgcttctcgtgatacccagatcatatgaaacagcatgactttttcaagagtgccatgcccgaaggATC	1	caatgcttctcgtgataccca atatgaaacagcatgacttt gatc t CTAg t gaagcccgtaccgtgagaac	CAATGCTTCTCGTGATACCCA	0	21	21	GAT	21	24	3	C	24	25	1	ATATGAAACAGCATGACTTTTTCAAGAGTGCCATGCCCGAAG	25	67	42	G	67	68	1		68	68	0	ATC	68	71	3		71	71	0
442	caatgcttctcgtgatacccagatcatatgaaacagcatgactttttcaagagtgccatgcccgaaggCCTCTTGAAAAAGA	1	caatgcttctcgtgatacccagatcatatgaaacagcatga tgccatg ctttttcaagag c GAAAAAGTTCTC c A Cggaagc	CAATGCTTCTCGTGATACCCAGATCATATGAAACAGCATGA	0	41	41	CTTTTTCAAGAG	41	53	12		53	53	0	TGCCATGCCCGAAGG	53	68	15		68	68	0	C	68	69	1	CTCTTGAAAAAG	69	81	12	A	81	82	1
443	caatgcttctcgtgatacccagatcatatgaaacagcatgactttttcaagagtgccatgcccgaaggTCATGCTGTTTCATATGAACT	1	caatgcttctcgtgatacccaga tttttcaagagt tcatatgaaacagcatgac g AGTATACTTTGTCGTACTggaagcccgtacc TCA	CAATGCTTCTCGTGATACCCAGA	0	23	23	TCATATGAAACAGCATGA	23	41	18	C	41	42	1	TTTTTCAAGAGTGCCATGCCCGAAG	42	67	25	G	67	68	1		68	68	0	TCATGCTGTTTCATATGA	68	86	18	ACT	86	89	3
444	caatgcttctcgtgatacccagatcatatgaaacagcatgactttttcaagagtgccatgcccgaaggGTATC	1	caatgcttctcgt agatcatatgaaacagcatgac gataccc t CTATGgg t aagcccgtaccgtgagaacttt	CAATGCTTCTCGT	0	13	13	GATAC	13	18	5	CC	18	20	2	AGATCATATGAAACAGCATGACTTTTTCAAGAGTGCCATGCCCGAA	20	66	46	GG	66	68	2		68	68	0	GTATC	68	73	5		73	73	0
445	caatgcttctcgtgatacccagatcatatgaaacagcatgactttttcaagagtgccatgcccgaaggGCCATGCTGTTTCATATGGCCCTTCGGGC	1	caatgcttctcgtgatacccagat actttttcaagagt catatgaaacagcatg g GTATACTTTGTCGTAC c CGGGCTTCCCG CGggaagcccgtac	CAATGCTTCTCGTGATACCCAGAT	0	24	24	CATATGAAACAGCATG	24	40	16		40	40	0	ACTTTTTCAAGAGTGCCATGCCCGAAGG	40	68	28		68	68	0	GC	68	70	2	CATGCTGTTTCATATG	70	86	16	GCCCTTCGGGC	86	97	11
446	caatgcttctcgtgatacccagatcatatgaaacagcatgactttttcaagagtgccatgcccgaaggGCACTCTTGAAAAAGAGTGCCCTTCGG	1	caatgcttctcgtgatacccagatcatatgaaacagcatga atgc ctttttcaagagtgcc c GAAAAAGTTCTCACGg c GGCTTCCCGTGA gaag	CAATGCTTCTCGTGATACCCAGATCATATGAAACAGCATGA	0	41	41	CTTTTTCAAGAGTGC	41	56	15	C	56	57	1	ATGCCCGAAG	57	67	10	G	67	68	1		68	68	0	GCACTCTTGAAAAAG	68	83	15	AGTGCCCTTCGG	83	95	12
447	caatgcttctcgtgatacccagatcatatgaaacagcatgactttttcaagagtgccatgcccgaaggTCAAATCATATGAAACAGCATGACTTTT	1	caatgcttctcgtgatacccagatcatatgaaacagca tttttcaagagt tgac g ACTggaagcccgtacc TTTTCAGTACGACAAAGTATACTAA	CAATGCTTCTCGTGATACCCAGATCATATGAAACAGCA	0	38	38	TGA	38	41	3	C	41	42	1	TTTTTCAAGAGTGCCATGCCCGAAG	42	67	25	G	67	68	1		68	68	0	TCA	68	71	3	AATCATATGAAACAGCATGACTTTT	71	96	25
448	caatgcttctcgtgatacccagatcatatgaaacagcatgactttttcaagagtgccatgcccgaaggGTCTCACGAGAAGCATTGAG	1	tacccagatcatatgaaacagcatgac caatgcttctcgtga t GTTACGAAGAGCACT t GA CTGggaagcccgtaccgtgagaacttt		0	0	0	CAATGCTTCTCGTGA	0	15	15		15	15	0	TACCCAGATCATATGAAACAGCATGACTTTTTCAAGAGTGCCATGCCCGAAGG	15	68	53		68	68	0	GTC	68	71	3	TCACGAGAAGCATTG	71	86	15	AG	86	88	2
449	caatgcttctcgtgatacccagatcatatgaaacagcatgactttttcaagagtgccatgcccgaaggGTCGGGCATGGCACCCTTCGGGCAT	1	caatgcttctcgtgatacccagatcatatgaaacagcatgactttttcaaga a gtgccatgcccga g CACGGTACGGGCT g TACGGGCTTCC G	CAATGCTTCTCGTGATACCCAGATCATATGAAACAGCATGACTTTTTCAAGA	0	52	52	GTGCCATGCCCGA	52	65	13		65	65	0	AGG	65	68	3		68	68	0	G	68	69	1	TCGGGCATGGCAC	69	82	13	CCTTCGGGCAT	82	93	11
450	caatgcttctcgtgatacccagatcatatgaaacagcatgactttttcaagagtgccatgcccgaaggCCTCTTGAAAT	1	caatgcttctcgtgatacccagatcatatgaaacagcatgactt tgccatg tttcaagag c AAAGTTCTC c T Cggaagc	CAATGCTTCTCGTGATACCCAGATCATATGAAACAGCATGACTT	0	44	44	TTTCAAGAG	44	53	9		53	53	0	TGCCATGCCCGAAGG	53	68	15		68	68	0	C	68	69	1	CTCTTGAAA	69	78	9	T	78	79	1
451	caatgcttctcgtgatacccagatcatatgaaacagcatgactttttcaagagtgccatgcccgaaggTCATGCTGTTTCATATGATCTGC	1	caatgcttctcgtgatacc tttttcaagagt cagatcatatgaaacagcatgac g GTCTAGTATACTTTGTCGTACTggaagcccgtacc C	CAATGCTTCTCGTGATACC	0	19	19	CAGATCATATGAAACAGCATGA	19	41	22	C	41	42	1	TTTTTCAAGAGTGCCATGCCCGAAG	42	67	25	G	67	68	1		68	68	0	TCATGCTGTTTCATATGATCTG	68	90	22	C	90	91	1
452	caatgcttctcgtgatacccagatcatatgaaacagcatgactttttcaagagtgccatgcccgaaggCATTCTTGAAAAA	1	caatgcttctcgtgatacccagatcatatgaaacagcatgac gtgccatgc tttttcaaga c AAAAAGTTCTTACggaagc	CAATGCTTCTCGTGATACCCAGATCATATGAAACAGCATGAC	0	42	42	TTTTTCAAGA	42	52	10		52	52	0	GTGCCATGCCCGAAGG	52	68	16		68	68	0	CAT	68	71	3	TCTTGAAAAA	71	81	10		81	81	0
453	caatgcttctcgtgatacccagatcatatgaaacagcatgactttttcaagagtgccatgcccgaaggGTCACGAGAAGCATTGA	1	tacccagatcatatgaaacagcatga caatgcttctcgtga c GTTACGAAGAGCACT t A Gggaagcccgtaccgtgagaactttt		0	0	0	CAATGCTTCTCGTGA	0	15	15		15	15	0	TACCCAGATCATATGAAACAGCATGACTTTTTCAAGAGTGCCATGCCCGAAGG	15	68	53		68	68	0	G	68	69	1	TCACGAGAAGCATTG	69	84	15	A	84	85	1
454	caatgcttctcgtgatacccagatcatatgaaacagcatgactttttcaagagtgccatgcccgaaggGGCATGGCACTT	1	caatgcttctcgtgatacccagatcatatgaaacagcatgactttttcaag g agtgccatgccc a TCACGGTACGGg a T g	CAATGCTTCTCGTGATACCCAGATCATATGAAACAGCATGACTTTTTCAAG	0	51	51	AGTGCCATGCC	51	62	11	C	62	63	1	GAAG	63	67	4	G	67	68	1		68	68	0	GGCATGGCACT	68	79	11	T	79	80	1
455	caatgcttctcgtgatacccagatcatatgaaacagcatgactttttcaagagtgccatgcccgaaggCATGGCACTCATGCCTTCGGGCAT	1	caatgcttctcgtgatacccagatcatatgaaacagcatgactttttcaa c gagtgccatgcc g CTCACGGTACgg a TACGGGCTTCCGTA a	CAATGCTTCTCGTGATACCCAGATCATATGAAACAGCATGACTTTTTCAA	0	50	50	GAGTGCCATG	50	60	10	CC	60	62	2	CGAA	62	66	4	GG	66	68	2		68	68	0	CATGGCACTC	68	78	10	ATGCCTTCGGGCAT	78	92	14
456	caatgcttctcgtgatacccagatcatatgaaacagcatgactttttcaagagtgccatgcccgaaggCACTCTTGAAAAAGTCGCGCTGTTTCATA	1	caatgcttctcgtgatacccagatcatatgaaacagcat atgc gactttttcaagagtgcc c CTGAAAAAGTTCTCACggaagc ATACTTTGTCGCG	CAATGCTTCTCGTGATACCCAGATCATATGAAACAGCAT	0	39	39	GACTTTTTCAAGAGTG	39	55	16	CC	55	57	2	ATGCCCGAA	57	66	9	GG	66	68	2		68	68	0	CACTCTTGAAAAAGTC	68	84	16	GCGCTGTTTCATA	84	97	13
457	caatgcttctcgtgatacccagatcatatgaaacagcatgactttttcaagagtgccatgcccgaaggCACTCTTGAAAAAGTCAA	1	caatgcttctcgtgatacccagatcatatgaaacagca atgc tgactttttcaagagtgcc c ACTGAAAAAGTTCTCACggaagc A	CAATGCTTCTCGTGATACCCAGATCATATGAAACAGCA	0	38	38	TGACTTTTTCAAGAGTG	38	55	17	CC	55	57	2	ATGCCCGAA	57	66	9	GG	66	68	2		68	68	0	CACTCTTGAAAAAGTCA	68	85	17	A	85	86	1
458	caatgcttctcgtgatacccagatcatatgaaacagcatgactttttcaagagtgccatgcccgaaggGCTCAGCCCTTCGGGCAT	1	caatgcttctcgtgatacccagatcatatgaaacagcatgactttttcaagagtgcc GCT atgcccgaagg C TACGGGCTTCCCGA	CAATGCTTCTCGTGATACCCAGATCATATGAAACAGCATGACTTTTTCAAGAGTGCC	0	57	57	ATGCCCGAAGG	57	68	11		68	68	0		68	68	0		68	68	0	GCTCAGC	68	75	7	CCTTCGGGCAT	75	86	11		86	86	0
459	caatgcttctcgtgatacccagatcatatgaaacagcatgactttttcaagagtgccatgcccgaaggTCATGCTGTG	1	caatgcttctcgtgatacccagatcatatgaa tttttcaagagt acagcatgac g TGTCGTACTggaagcccgtacc G	CAATGCTTCTCGTGATACCCAGATCATATGAA	0	32	32	ACAGCATGA	32	41	9	C	41	42	1	TTTTTCAAGAGTGCCATGCCCGAAG	42	67	25	G	67	68	1		68	68	0	TCATGCTGT	68	77	9	G	77	78	1
460	caatgcttctcgtgatacccagatcatatgaaacagcatgactttttcaagagtgccatgcccgaaggGATTCGTCAATGTCTCGTGATACCCAGATCAT	1	c gcttctcgtgatacccagatcatatgaaacag aat c TTAGggaagcccgtaccgtgagaactttttcagta TACTAGACCCATAGTGCTCTGTAACTGC	C	0	1	1	AAT	1	4	3		4	4	0	GCTTCTCGTGATACCCAGATCATATGAAACAGCATGACTTTTTCAAGAGTGCCATGCCCGAAGG	4	68	64		68	68	0	G	68	69	1	ATT	69	72	3	CGTCAATGTCTCGTGATACCCAGATCAT	72	100	28
461	caatgcttctcgtgatacccagatcatatgaaacagcatgactttttcaagagtgccatgcccgaaggCACTCTTGAAAAAGCCATGC	1	caatgcttctcgtgatacccagatcatatgaaacagcatga atgc ctttttcaagagtgcc c GAAAAAGTTCTCACggaagc CGTACC	CAATGCTTCTCGTGATACCCAGATCATATGAAACAGCATGA	0	41	41	CTTTTTCAAGAGTG	41	55	14	CC	55	57	2	ATGCCCGAA	57	66	9	GG	66	68	2		68	68	0	CACTCTTGAAAAAG	68	82	14	CCATGC	82	88	6
462	caatgcttctcgtgatacccagatcatatgaaacagcatgactttttcaagagtgccatgcccgaaggCACTCTTGAAAAAT	1	caatgcttctcgtgatacccagatcatatgaaacagcatgac atgc tttttcaagagtgcc c AAAAAGTTCTCACggaagc T	CAATGCTTCTCGTGATACCCAGATCATATGAAACAGCATGAC	0	42	42	TTTTTCAAGAGTG	42	55	13	CC	55	57	2	ATGCCCGAA	57	66	9	GG	66	68	2		68	68	0	CACTCTTGAAAAA	68	81	13	T	81	82	1
463	caatgcttctcgtgatacccagatcatatgaaacagcatgactttttcaagagtgccatgcccgaaggGTATCACGAGAT	1	caatgct agatcatatgaaacagcatgac tctcgtgataccc t AGAGCACTATGgg t T aagcccgtaccgtgagaacttt	CAATGCT	0	7	7	TCTCGTGATAC	7	18	11	CC	18	20	2	AGATCATATGAAACAGCATGACTTTTTCAAGAGTGCCATGCCCGAA	20	66	46	GG	66	68	2		68	68	0	GTATCACGAGA	68	79	11	T	79	80	1
464	caatgcttctcgtgatacccagatcatatgaaacagcatgactttttcaagagtgccatgcccgaaggGCAATG	1	caatgcttctcgtgatacccagatcatatgaaacagcatgactttttcaagagtgcca g tgccc a ACGgga GTA	CAATGCTTCTCGTGATACCCAGATCATATGAAACAGCATGACTTTTTCAAGAGTGCCA	0	58	58	TGC	58	61	3	CC	61	63	2	GAA	63	66	3	GG	66	68	2		68	68	0	GCA	68	71	3	ATG	71	74	3
465	caatgcttctcgtgatacccagatcatatgaaacagcatgactttttcaagagtgccatgcccgaaggGCAATC	1	caatgcttctcgtgatacccagatcatatgaaacagcatgactttttcaagagtgcca g tgccc a ACGgga CTA	CAATGCTTCTCGTGATACCCAGATCATATGAAACAGCATGACTTTTTCAAGAGTGCCA	0	58	58	TGC	58	61	3	CC	61	63	2	GAA	63	66	3	GG	66	68	2		68	68	0	GCA	68	71	3	ATC	71	74	3
466	caatgcttctcgtgatacccagatcatatgaaacagcatgactttttcaagagtgccatgcccgaaggCAATGGCA	1	caatgcttctcgtgatacccagatcatatgaaacagcatgactttttcaagag gcccg tgccat a ACGGTAACgga	CAATGCTTCTCGTGATACCCAGATCATATGAAACAGCATGACTTTTTCAAGAG	0	53	53	TGCCAT	53	59	6		59	59	0	GCCCGAAGG	59	68	9		68	68	0	CA	68	70	2	ATGGCA	70	76	6		76	76	0
467	caatgcttctcgtgatacccagatcatatgaaacagcatgactttttcaagagtgccatgcccgaaggCACTCTTGAAAAAGAC	1	caatgcttctcgtgatacccagatcatatgaaacagcatga atgc ctttttcaagagtgcc c GAAAAAGTTCTCACggaagc CA	CAATGCTTCTCGTGATACCCAGATCATATGAAACAGCATGA	0	41	41	CTTTTTCAAGAGTG	41	55	14	CC	55	57	2	ATGCCCGAA	57	66	9	GG	66	68	2		68	68	0	CACTCTTGAAAAAG	68	82	14	AC	82	84	2
468	caatgcttctcgtgatacccagatcatatgaaacagcatgactttttcaagagtgccatgcccgaaggCCATGCTGTTTCATGGCCTTCGGGC	1	caatgcttctcgtgatacccagatcat actttttcaagagt atgaaacagcatg g TACTTTGTCGTACCggaagcccgtacc CGGGCTTCCGG	CAATGCTTCTCGTGATACCCAGATCAT	0	27	27	ATGAAACAGCATG	27	40	13		40	40	0	ACTTTTTCAAGAGTGCCATGCCCGAAGG	40	68	28		68	68	0	C	68	69	1	CATGCTGTTTCAT	69	82	13	GGCCTTCGGGC	82	93	11
469	caatgcttctcgtgatacccagatcatatgaaacagcatgactttttcaagagtgccatgcccgaaggGTATCTCGAGAAGCATTGAT	1	caatgcttctcgt agatcatatgaaacagcatgac gataccc t CTATGgg t TAGTTACGAAGAGCT aagcccgtaccgtgagaacttt	CAATGCTTCTCGT	0	13	13	GATAC	13	18	5	CC	18	20	2	AGATCATATGAAACAGCATGACTTTTTCAAGAGTGCCATGCCCGAA	20	66	46	GG	66	68	2		68	68	0	GTATC	68	73	5	TCGAGAAGCATTGAT	73	88	15
470	caatgcttctcgtgatacccagatcatatgaaacagcatgactttttcaagagtgccatgcccgaaggGCAATGC	1	caatgcttctcgtgatacccagatcatatgaaacagcatgactttttcaagagtgcca g tgccc a ACGgga CGTA	CAATGCTTCTCGTGATACCCAGATCATATGAAACAGCATGACTTTTTCAAGAGTGCCA	0	58	58	TGC	58	61	3	CC	61	63	2	GAA	63	66	3	GG	66	68	2		68	68	0	GCA	68	71	3	ATGC	71	75	4
471	caatgcttctcgtgatacccagatcatatgaaacagcatgactttttcaagagtgccatgcccgaaggCATTCCC	1	c ttctcgtgatacccagatcatatgaaacag aatgc c TTACggaagcccgtaccgtgagaactttttcagta CCC	C	0	1	1	AATG	1	5	4	C	5	6	1	TTCTCGTGATACCCAGATCATATGAAACAGCATGACTTTTTCAAGAGTGCCATGCCCGAAG	6	67	61	G	67	68	1		68	68	0	CATT	68	72	4	CCC	72	75	3
472	caatgcttctcgtgatacccagatcatatgaaacagcatgactttttcaagagtgccatgcccgaaggGCATTGATCTGGGTATCACTGCCCTTCGGGCG	1	caatgcttctc tatgaaacagcatgactttttc gtgatacccagatca a CACTATGGGTCTAGT a GCGGGCTTCCCGT TACGggaagcccgtaccgtgag	CAATGCTTCTC	0	11	11	GTGATACCCAGATCA	11	26	15		26	26	0	TATGAAACAGCATGACTTTTTCAAGAGTGCCATGCCCGAAGG	26	68	42		68	68	0	GCAT	68	72	4	TGATCTGGGTATCAC	72	87	15	TGCCCTTCGGGCG	87	100	13
473	caatgcttctcgtgatacccagatcatatgaaacagcatgactttttcaagagtgccatgcccgaaggGCATGGCACTCTAGAAAAA	1	caatgcttctcgtgatacccagatcatatgaaacagcatgactttttca g agagtgccatgccc a TCTCACGGTACGgga AAAAAGA	CAATGCTTCTCGTGATACCCAGATCATATGAAACAGCATGACTTTTTCA	0	49	49	AGAGTGCCATGC	49	61	12	CC	61	63	2	GAA	63	66	3	GG	66	68	2		68	68	0	GCATGGCACTCT	68	80	12	AGAAAAA	80	87	7
474	caatgcttctcgtgatacccagatcatatgaaacagcatgactttttcaagagtgccatgcccgaaggGCGAC	1	caatgcttctcgtgatacccagatcatatgaaacagcatgactttttcaagagtgccat g gccc a CGgga CAG	CAATGCTTCTCGTGATACCCAGATCATATGAAACAGCATGACTTTTTCAAGAGTGCCAT	0	59	59	GC	59	61	2	CC	61	63	2	GAA	63	66	3	GG	66	68	2		68	68	0	GC	68	70	2	GAC	70	73	3
475	caatgcttctcgtgatacccagatcatatgaaacagcatgactttttcaagagtgccatgcccgaaggGCATGGCACTCTTGG	1	caatgcttctcgtgatacccagatcatatgaaacagcatgacttttt g caagagtgccatgccc a GTTCTCACGGTACGgga G	CAATGCTTCTCGTGATACCCAGATCATATGAAACAGCATGACTTTTT	0	47	47	CAAGAGTGCCATGC	47	61	14	CC	61	63	2	GAA	63	66	3	GG	66	68	2		68	68	0	GCATGGCACTCTTG	68	82	14	G	82	83	1
476	caatgcttctcgtgatacccagatcatatgaaacagcatgactttttcaagagtgccatgcccgaaggCAAACAGCG	1	caatgcttctcgtgatacccagatcatatgaaacagcatgact tcaagagtgcc ttt a AAACggaagcccgt GCGAC	CAATGCTTCTCGTGATACCCAGATCATATGAAACAGCATGACT	0	43	43	TTT	43	46	3		46	46	0	TCAAGAGTGCCATGCCCGAAGG	46	68	22		68	68	0	C	68	69	1	AAA	69	72	3	CAGCG	72	77	5
477	caatgcttctcgtgatacccagatcatatgaaacagcatgactttttcaagagtgccatgcccgaaggTCAAGCTGTTTCATAT	1	caatgcttctcgtgatacccagatc atgactttttcaagagt atatgaaacagc g TATACTTTGTCGAACTggaagcccgtacc	CAATGCTTCTCGTGATACCCAGATC	0	25	25	ATATGAAACAGC	25	37	12		37	37	0	ATGACTTTTTCAAGAGTGCCATGCCCGAAGG	37	68	31		68	68	0	TCAA	68	72	4	GCTGTTTCATAT	72	84	12		84	84	0
478	caatgcttctcgtgatacccagatcatatgaaacagcatgactttttcaagagtgccatgcccgaaggGCATGGCACTG	1	caatgcttctcgtgatacccagatcatatgaaacagcatgactttttcaag g agtgccatgccc a TCACGGTACGgga G	CAATGCTTCTCGTGATACCCAGATCATATGAAACAGCATGACTTTTTCAAG	0	51	51	AGTGCCATGC	51	61	10	CC	61	63	2	GAA	63	66	3	GG	66	68	2		68	68	0	GCATGGCACT	68	78	10	G	78	79	1
479	caatgcttctcgtgatacccagatcatatgaaacagcatgactttttcaagagtgccatgcccgaaggGCATGGCACTCTGAAAAAGTCATGCT	1	caatgcttctcgtgatacccagatcatatgaaacagcatgactttttca g agagtgccatgccc a TCTCACGGTACGgga TCGTACTGAAAAAG	CAATGCTTCTCGTGATACCCAGATCATATGAAACAGCATGACTTTTTCA	0	49	49	AGAGTGCCATGC	49	61	12	CC	61	63	2	GAA	63	66	3	GG	66	68	2		68	68	0	GCATGGCACTCT	68	80	12	GAAAAAGTCATGCT	80	94	14
480	caatgcttctcgtgatacccagatcatatgaaacagcatgactttttcaagagtgccatgcccgaaggGCGATCTGGGTATCACGAGAAGCA	1	caa atatgaaacagcatgacttttt tgcttctcgtgatacccagatc c ACGAAGAGCACTATGGGTCTAGCGggaagcccgtaccgtgagaa	CAA	0	3	3	TGCTTCTCGTGATACCCAGATC	3	25	22		25	25	0	ATATGAAACAGCATGACTTTTTCAAGAGTGCCATGCCCGAAGG	25	68	43		68	68	0	GC	68	70	2	GATCTGGGTATCACGAGAAGCA	70	92	22		92	92	0
481	caatgcttctcgtgatacccagatcatatgaaacagcatgactttttcaagagtgccatgcccgaaggCAATGCTTCATATGATCT	1	caatgcttctcgtgatacccagatcatatgaaacagcatgactttttcaagagtgcca c tgcc g ACgg a TCTAGTATACTTCGTA a	CAATGCTTCTCGTGATACCCAGATCATATGAAACAGCATGACTTTTTCAAGAGTGCCA	0	58	58	TG	58	60	2	CC	60	62	2	CGAA	62	66	4	GG	66	68	2		68	68	0	CA	68	70	2	ATGCTTCATATGATCT	70	86	16
482	caatgcttctcgtgatacccagatcatatgaaacagcatgactttttcaagagtgccatgcccgaaggCATTGGCCTTCGGGCATG	1	caatgcttctcgtgatacccagatcatatgaaacagcatgactttttcaagagtgc CA catgcccgaagg T GTACGGGCTTCC T GG	CAATGCTTCTCGTGATACCCAGATCATATGAAACAGCATGACTTTTTCAAGAGTGC	0	56	56	CATGCCCGAAGG	56	68	12		68	68	0		68	68	0		68	68	0	CATTGG	68	74	6	CCTTCGGGCATG	74	86	12		86	86	0
483	caatgcttctcgtgatacccagatcatatgaaacagcatgactttttcaagagtgccatgcccgaaggGGAGAAGCATTGAA	1	gtgatacccagatcatatgaaacagcat caatgcttctc g GTTACGAAGAG a AA Gggaagcccgtaccgtgagaactttttc		0	0	0	CAATGCTTCTC	0	11	11		11	11	0	GTGATACCCAGATCATATGAAACAGCATGACTTTTTCAAGAGTGCCATGCCCGAAGG	11	68	57		68	68	0	G	68	69	1	GAGAAGCATTG	69	80	11	AA	80	82	2
484	caatgcttctcgtgatacccagatcatatgaaacagcatgactttttcaagagtgccatgcccgaaggTCATGCTGTTTCATGACCTTCGGGCAA	1	caatgcttctcgtgatacccagatcat tttttcaagagt atgaaacagcatgac g TACTTTGTCGTACTggaagcccgtacc AACGGGCTTCCAG	CAATGCTTCTCGTGATACCCAGATCAT	0	27	27	ATGAAACAGCATGA	27	41	14	C	41	42	1	TTTTTCAAGAGTGCCATGCCCGAAG	42	67	25	G	67	68	1		68	68	0	TCATGCTGTTTCAT	68	82	14	GACCTTCGGGCAA	82	95	13
485	caatgcttctcgtgatacccagatcatatgaaacagcatgactttttcaagagtgccatgcccgaaggGTAAT	1	caatgcttctcgtga agatcatatgaaacagcatgac taccc t ATGgg t TA aagcccgtaccgtgagaacttt	CAATGCTTCTCGTGA	0	15	15	TAC	15	18	3	CC	18	20	2	AGATCATATGAAACAGCATGACTTTTTCAAGAGTGCCATGCCCGAA	20	66	46	GG	66	68	2		68	68	0	GTA	68	71	3	AT	71	73	2
486	caatgcttctcgtgatacccagatcatatgaaacagcatgactttttcaagagtgccatgcccgaaggCACTCTTGAAAAGTCACGCTGTTTCAT	1	caatgcttctcgtgatacccagatcatatgaaacagcatgact atgc ttttcaagagtgcc c AAAAGTTCTCACggaagc TACTTTGTCGCACTG	CAATGCTTCTCGTGATACCCAGATCATATGAAACAGCATGACT	0	43	43	TTTTCAAGAGTG	43	55	12	CC	55	57	2	ATGCCCGAA	57	66	9	GG	66	68	2		68	68	0	CACTCTTGAAAA	68	80	12	GTCACGCTGTTTCAT	80	95	15
487	caatgcttctcgtgatacccagatcatatgaaacagcatgactttttcaagagtgccatgcccgaaggCCATGCTGTTTCATGGCCTTCGGGCG	1	caatgcttctcgtgatacccagatcat actttttcaagagt atgaaacagcatg g TACTTTGTCGTACCggaagcccgtacc GCGGGCTTCCGG	CAATGCTTCTCGTGATACCCAGATCAT	0	27	27	ATGAAACAGCATG	27	40	13		40	40	0	ACTTTTTCAAGAGTGCCATGCCCGAAGG	40	68	28		68	68	0	C	68	69	1	CATGCTGTTTCAT	69	82	13	GGCCTTCGGGCG	82	94	12
488	caatgcttctcgtgatacccagatcatatgaaacagcatgactttttcaagagtgccatgcccgaaggGTCGGGCATGGCAA	1	caatgcttctcgtgatacccagatcatatgaaacagcatgactttttcaagag a tgccatgcccga g ACGGTACGGGCT g A G	CAATGCTTCTCGTGATACCCAGATCATATGAAACAGCATGACTTTTTCAAGAG	0	53	53	TGCCATGCCCGA	53	65	12		65	65	0	AGG	65	68	3		68	68	0	G	68	69	1	TCGGGCATGGCA	69	81	12	A	81	82	1
489	caatgcttctcgtgatacccagatcatatgaaacagcatgactttttcaagagtgccatgcccgaaggCACTCTTGAAAAAGAGTGCCTTCGGG	1	caatgcttctcgtgatacccagatcatatgaaacagcatga atgc ctttttcaagagtgcc c GAAAAAGTTCTCACggaagc GGGCTTCCGTGA	CAATGCTTCTCGTGATACCCAGATCATATGAAACAGCATGA	0	41	41	CTTTTTCAAGAGTG	41	55	14	CC	55	57	2	ATGCCCGAA	57	66	9	GG	66	68	2		68	68	0	CACTCTTGAAAAAG	68	82	14	AGTGCCTTCGGG	82	94	12
490	caatgcttctcgtgatacccagatcatatgaaacagcatgactttttcaagagtgccatgcccgaaggGGCATGGCACTCTTGAAAAAGCAATGCTTCTTGTGATACCCAC	1	caatgcttctcgtgatacccagatcatatgaaacagcatga g ctttttcaagagtgccatgccc a GAAAAAGTTCTCACGGTACGGg a CACCCATAGTGTTCTTCGTAAC g	CAATGCTTCTCGTGATACCCAGATCATATGAAACAGCATGA	0	41	41	CTTTTTCAAGAGTGCCATGCC	41	62	21	C	62	63	1	GAAG	63	67	4	G	67	68	1		68	68	0	GGCATGGCACTCTTGAAAAAG	68	89	21	CAATGCTTCTTGTGATACCCAC	89	111	22
491	caatgcttctcgtgatacccagatcatatgaaacagcatgactttttcaagagtgccatgcccgaaggGGGGGGT	1	caatgcttctcgtgatacccagatcatatgaaacagcatgactttttcaagagtgccatg g ccc a GGg a TGGGG g	CAATGCTTCTCGTGATACCCAGATCATATGAAACAGCATGACTTTTTCAAGAGTGCCATG	0	60	60	CC	60	62	2	C	62	63	1	GAAG	63	67	4	G	67	68	1		68	68	0	GG	68	70	2	GGGGT	70	75	5
492	caatgcttctcgtgatacccagatcatatgaaacagcatgactttttcaagagtgccatgcccgaaggGAGAAACAGAGT	1	caatgc gtgatacccagatcatatgaaacagcat ttctc g AAGAGggaagcccgtaccgtgagaactttttca TGAGACA	CAATGC	0	6	6	TTCTC	6	11	5		11	11	0	GTGATACCCAGATCATATGAAACAGCATGACTTTTTCAAGAGTGCCATGCCCGAAGG	11	68	57		68	68	0		68	68	0	GAGAA	68	73	5	ACAGAGT	73	80	7
493	caatgcttctcgtgatacccagatcatatgaaacagcatgactttttcaagagtgccatgcccgaaggCAATGCTTCTCGTGAT	1	caatgcttctcgtgatacccagatcatatgaaacagcatgactttttcaagagtgcca c tgcc g ACgg a TAGTGCTCTTCGTA a	CAATGCTTCTCGTGATACCCAGATCATATGAAACAGCATGACTTTTTCAAGAGTGCCA	0	58	58	TG	58	60	2	CC	60	62	2	CGAA	62	66	4	GG	66	68	2		68	68	0	CA	68	70	2	ATGCTTCTCGTGAT	70	84	14
494	caatgcttctcgtgatacccagatcatatgaaacagcatgactttttcaagagtgccatgcccgaaggATGACTTTTTCAAGAGTGCCATGCCCGAAG	1	caatgcttctcgtgatacccaga atgaaacagcatgacttttt tcat c AGTAggaagcccgtaccgtgagaa GAAGCCCGTACCGTGAGAACTTTTTC	CAATGCTTCTCGTGATACCCAGA	0	23	23	TCAT	23	27	4		27	27	0	ATGAAACAGCATGACTTTTTCAAGAGTGCCATGCCCGAAGG	27	68	41		68	68	0		68	68	0	ATGA	68	72	4	CTTTTTCAAGAGTGCCATGCCCGAAG	72	98	26
495	caatgcttctcgtgatacccagatcatatgaaacagcatgactttttcaagagtgccatgcccgaaggGTAACTCTTGAAAAAGTCATGCT	1	caatgcttctcgtgatacccagatcatatgaaac gccatgcc agcatgactttttcaagagt c TCGTACTGAAAAAGTTCTCAATGggaag	CAATGCTTCTCGTGATACCCAGATCATATGAAAC	0	34	34	AGCATGACTTTTTCAAGAGT	34	54	20		54	54	0	GCCATGCCCGAAGG	54	68	14		68	68	0	GTA	68	71	3	ACTCTTGAAAAAGTCATGCT	71	91	20		91	91	0
496	caatgcttctcgtgatacccagatcatatgaaacagcatgactttttcaagagtgccatgcccgaaggCCATGCTGTTTCATGGCCTTCGGGCATGGC	1	caatgcttctcgtgatacccagatcat actttttcaagagt atgaaacagcatg g TACTTTGTCGTACCggaagcccgtacc CGGTACGGGCTTCCGG	CAATGCTTCTCGTGATACCCAGATCAT	0	27	27	ATGAAACAGCATG	27	40	13		40	40	0	ACTTTTTCAAGAGTGCCATGCCCGAAGG	40	68	28		68	68	0	C	68	69	1	CATGCTGTTTCAT	69	82	13	GGCCTTCGGGCATGGC	82	98	16
497	caatgcttctcgtgatacccagatcatatgaaacagcatgactttttcaagagtgccatgcccgaaggCATGGCA	1	caatgcttctcgtgatacccagatcatatgaaacagcatgactttttcaagag c tgccatgcc g ACGGTACgg a a	CAATGCTTCTCGTGATACCCAGATCATATGAAACAGCATGACTTTTTCAAGAG	0	53	53	TGCCATG	53	60	7	CC	60	62	2	CGAA	62	66	4	GG	66	68	2		68	68	0	CATGGCA	68	75	7		75	75	0
498	caatgcttctcgtgatacccagatcatatgaaacagcatgactttttcaagagtgccatgcccgaaggTCATGCTGTTCCATATGATCT	1	caatgcttctcgtgatacccagatcatatga tttttcaagagt aacagcatgac g TTGTCGTACTggaagcccgtacc TCTAGTATACC	CAATGCTTCTCGTGATACCCAGATCATATGA	0	31	31	AACAGCATGA	31	41	10	C	41	42	1	TTTTTCAAGAGTGCCATGCCCGAAG	42	67	25	G	67	68	1		68	68	0	TCATGCTGTT	68	78	10	CCATATGATCT	78	89	11
499	caatgcttctcgtgatacccagatcatatgaaacagcatgactttttcaagagtgccatgcccgaaggGCTTCTATGA	1	caatgcttctcgtgatacccagatcatatgaaacagcatgactttttcaagagtgccatgccc g gaa g CTTCG AGTAT	CAATGCTTCTCGTGATACCCAGATCATATGAAACAGCATGACTTTTTCAAGAGTGCCATGCCC	0	63	63	GAAG	63	67	4		67	67	0	G	67	68	1		68	68	0	G	68	69	1	CTTC	69	73	4	TATGA	73	78	5
500	caatgcttctcgtgatacccagatcatatgaaacagcatgactttttcaagagtgccatgcccgaaggCACTCTTGAAAAAGTCATGCTGTT	1	caatgcttctcgtgatacccagatcatatga atgc aacagcatgactttttcaagagtgcc c TTGTCGTACTGAAAAAGTTCTCACggaagc	CAATGCTTCTCGTGATACCCAGATCATATGA	0	31	31	AACAGCATGACTTTTTCAAGAGTG	31	55	24	CC	55	57	2	ATGCCCGAA	57	66	9	GG	66	68	2		68	68	0	CACTCTTGAAAAAGTCATGCTGTT	68	92	24		92	92	0
501	caatgcttctcgtgatacccagatcatatgaaacagcatgactttttcaagagtgccatgcccgaaggGCCAT	1	caatgcttctcgtgatacccagatcatatgaaacagcatgactttttcaagagtgccat g gccc a CGgga TAC	CAATGCTTCTCGTGATACCCAGATCATATGAAACAGCATGACTTTTTCAAGAGTGCCAT	0	59	59	GC	59	61	2	CC	61	63	2	GAA	63	66	3	GG	66	68	2		68	68	0	GC	68	70	2	CAT	70	73	3
502	caatgcttctcgtgatacccagatcatatgaaacagcatgactttttcaagagtgccatgcccgaaggGCGTCGGCCCTTCGGGCAT	1	caatgcttctcgtgatacccagatcatatgaaacagcatgactttttcaagagtgcc GCG atgcccgaagg T TACGGGCTTCC C CGG	CAATGCTTCTCGTGATACCCAGATCATATGAAACAGCATGACTTTTTCAAGAGTGCC	0	57	57	ATGCCCGAAGG	57	68	11		68	68	0		68	68	0		68	68	0	GCGTCGGC	68	76	8	CCTTCGGGCAT	76	87	11		87	87	0
503	caatgcttctcgtgatacccagatcatatgaaacagcatgactttttcaagagtgccatgcccgaaggCCTCTTGAAAAAGT	1	caatgcttctcgtgatacccagatcatatgaaacagcatg tgccatg actttttcaagag c TGAAAAAGTTCTC c Cggaagc	CAATGCTTCTCGTGATACCCAGATCATATGAAACAGCATG	0	40	40	ACTTTTTCAAGAG	40	53	13		53	53	0	TGCCATGCCCGAAGG	53	68	15		68	68	0	C	68	69	1	CTCTTGAAAAAGT	69	82	13		82	82	0
504	caatgcttctcgtgatacccagatcatatgaaacagcatgactttttcaagagtgccatgcccgaaggGAGAAGCATTGA	1	gtgatacccagatcatatgaaacagcat caatgcttctc g GTTACGAAGAGggaagcccgtaccgtgagaactttttca A		0	0	0	CAATGCTTCTC	0	11	11		11	11	0	GTGATACCCAGATCATATGAAACAGCATGACTTTTTCAAGAGTGCCATGCCCGAAGG	11	68	57		68	68	0		68	68	0	GAGAAGCATTG	68	79	11	A	79	80	1
505	caatgcttctcgtgatacccagatcatatgaaacagcatgactttttcaagagtgccatgcccgaaggTCTGCATCCT	1	caatgcttctcgtgatacc tcatatgaaacagcatgacttt caga t GTCTggaagcccgtaccgtgagaact TCCTAC	CAATGCTTCTCGTGATACC	0	19	19	CAGA	19	23	4		23	23	0	TCATATGAAACAGCATGACTTTTTCAAGAGTGCCATGCCCGAAGG	23	68	45		68	68	0		68	68	0	TCTG	68	72	4	CATCCT	72	78	6
506	caatgcttctcgtgatacccagatcatatgaaacagcatgactttttcaagagtgccatgcccgaaggGCATGGCACTCTGAAAAAGT	1	caatgcttctcgtgatacccagatcatatgaaacagcatgactttttca g agagtgccatgccc a TCTCACGGTACGgga TGAAAAAG	CAATGCTTCTCGTGATACCCAGATCATATGAAACAGCATGACTTTTTCA	0	49	49	AGAGTGCCATGC	49	61	12	CC	61	63	2	GAA	63	66	3	GG	66	68	2		68	68	0	GCATGGCACTCT	68	80	12	GAAAAAGT	80	88	8
507	caatgcttctcgtgatacccagatcatatgaaacagcatgactttttcaagagtgccatgcccgaaggCACTCTTGAAAGAGTGCCTTCGGGCA	1	caatgcttctcgtgatacccagatcatatgaaacagcatgactt atgc tttcaagagtgcc c AAAGTTCTCACggaagc ACGGGCTTCCGTGAG	CAATGCTTCTCGTGATACCCAGATCATATGAAACAGCATGACTT	0	44	44	TTTCAAGAGTG	44	55	11	CC	55	57	2	ATGCCCGAA	57	66	9	GG	66	68	2		68	68	0	CACTCTTGAAA	68	79	11	GAGTGCCTTCGGGCA	79	94	15
508	caatgcttctcgtgatacccagatcatatgaaacagcatgactttttcaagagtgccatgcccgaaggGTCATGGCATGGCACTCTTGAAAAA	1	caatgcttctcgtgatacccagatcatatgaaacagcatgac g tttttcaagagtgccatgcc-----c a AAAAAGTTCTCACGGTACGGTACTGg a g	CAATGCTTCTCGTGATACCCAGATCATATGAAACAGCATGAC	0	42	42	TTTTTCAAGAGTGCCATGCC	42	62	20	C	62	63	1	GAAG	63	67	4	G	67	68	1	GTCAT	68	73	5	GGCATGGCACTCTTGAAAAA	73	93	20		93	93	0
509	caatgcttctcgtgatacccagatcatatgaaacagcatgactttttcaagagtgccatgcccgaaggTCATGCTGTTTCATATGAAAGCATTGA	1	caatgcttctcgtgatacccaga tttttcaagagt tcatatgaaacagcatgac g AGTATACTTTGTCGTACTggaagcccgtacc AGTTACGAA	CAATGCTTCTCGTGATACCCAGA	0	23	23	TCATATGAAACAGCATGA	23	41	18	C	41	42	1	TTTTTCAAGAGTGCCATGCCCGAAG	42	67	25	G	67	68	1		68	68	0	TCATGCTGTTTCATATGA	68	86	18	AAGCATTGA	86	95	9
510	caatgcttctcgtgatacccagatcatatgaaacagcatgactttttcaagagtgccatgcccgaaggCATGGGACTCTTGAAAAAGTCACCATGCCTTCGG	1	caatgcttctcgtgatacccagatcatatgaaacagcatgactttttcaagagtgccatgc CATGGGACTCTTG ccgaagg A GGCTTCCGTACCACTGAAAA	CAATGCTTCTCGTGATACCCAGATCATATGAAACAGCATGACTTTTTCAAGAGTGCCATGC	0	61	61	CCGAAGG	61	68	7		68	68	0		68	68	0		68	68	0	CATGGGACTCTTGAAAAAGTCACCATG	68	95	27	CCTTCGG	95	102	7		102	102	0
511	caatgcttctcgtgatacccagatcatatgaaacagcatgactttttcaagagtgccatgcccgaaggGATGCTGTT	1	caatgcttctcgtgatacccagatcatatga gactttttcaagag aacagcat t TTGTCGTA g Gggaagcccgtacc	CAATGCTTCTCGTGATACCCAGATCATATGA	0	31	31	AACAGCAT	31	39	8		39	39	0	GACTTTTTCAAGAGTGCCATGCCCGAAGG	39	68	29		68	68	0	G	68	69	1	ATGCTGTT	69	77	8		77	77	0
512	caatgcttctcgtgatacccagatcatatgaaacagcatgactttttcaagagtgccatgcccgaaggGTATCACGAGAGGCATTGGT	1	caatgct agatcatatgaaacagcatgac tctcgtgataccc t AGAGCACTATGgg t TGGTTACGG aagcccgtaccgtgagaacttt	CAATGCT	0	7	7	TCTCGTGATAC	7	18	11	CC	18	20	2	AGATCATATGAAACAGCATGACTTTTTCAAGAGTGCCATGCCCGAA	20	66	46	GG	66	68	2		68	68	0	GTATCACGAGA	68	79	11	GGCATTGGT	79	88	9
513	caatgcttctcgtgatacccagatcatatgaaacagcatgactttttcaagagtgccatgcccgaaggCCTGGCAGTCTTGAAAAAG	1	caatgcttctcgtgatac atcatatgaaacagcatgacttt ccag t GGTCCggaagcccgtaccgtgagaact GAAAAAGTTCTGAC	CAATGCTTCTCGTGATAC	0	18	18	CCAG	18	22	4		22	22	0	ATCATATGAAACAGCATGACTTTTTCAAGAGTGCCATGCCCGAAGG	22	68	46		68	68	0	C	68	69	1	CTGG	69	73	4	CAGTCTTGAAAAAG	73	87	14
514	caatgcttctcgtgatacccagatcatatgaaacagcatgactttttcaagagtgccatgcccgaaggCACTCTTGAAAAGTCATGCTGTT	1	caatgcttctcgtgatacccagatcatatgaaacagcatgact atgc ttttcaagagtgcc c AAAAGTTCTCACggaagc TTGTCGTACTG	CAATGCTTCTCGTGATACCCAGATCATATGAAACAGCATGACT	0	43	43	TTTTCAAGAGTG	43	55	12	CC	55	57	2	ATGCCCGAA	57	66	9	GG	66	68	2		68	68	0	CACTCTTGAAAA	68	80	12	GTCATGCTGTT	80	91	11
515	caatgcttctcgtgatacccagatcatatgaaacagcatgactttttcaagagtgccatgcccgaaggGCATGGCACTCAC	1	caatgcttctcgtgatacccagatcatatgaaacagcatgactttttcaa g gagtgccatgccc a CTCACGGTACGgga CA	CAATGCTTCTCGTGATACCCAGATCATATGAAACAGCATGACTTTTTCAA	0	50	50	GAGTGCCATGC	50	61	11	CC	61	63	2	GAA	63	66	3	GG	66	68	2		68	68	0	GCATGGCACTC	68	79	11	AC	79	81	2
516	caatgcttctcgtgatacccagatcatatgaaacagcatgactttttcaagagtgccatgcccgaaggGCCTGGCACTCTTGAAAAAGTC	1	caatgcttctcgtgatacccagatcatatgaaacagcat tgcccg gactttttcaagagtgcca a CTGAAAAAGTTCTCACGGTCCGgga	CAATGCTTCTCGTGATACCCAGATCATATGAAACAGCAT	0	39	39	GACTTTTTCAAGAGTGCCA	39	58	19		58	58	0	TGCCCGAAGG	58	68	10		68	68	0	GCC	68	71	3	TGGCACTCTTGAAAAAGTC	71	90	19		90	90	0
517	caatgcttctcgtgatacccagatcatatgaaacagcatgactttttcaagagtgccatgcccgaaggCATTGAT	1	ttctcgtgatacccagatcatatgaaacag caatgc c GTTACggaagcccgtaccgtgagaactttttcagta TA		0	0	0	CAATG	0	5	5	C	5	6	1	TTCTCGTGATACCCAGATCATATGAAACAGCATGACTTTTTCAAGAGTGCCATGCCCGAAG	6	67	61	G	67	68	1		68	68	0	CATTG	68	73	5	AT	73	75	2
518	caatgcttctcgtgatacccagatcatatgaaacagcatgactttttcaagagtgccatgcccgaaggTCATGCTGTTTGC	1	caatgcttctcgtgatacccagatcatatg tttttcaagagt aaacagcatgac g TTTGTCGTACTggaagcccgtacc CG	CAATGCTTCTCGTGATACCCAGATCATATG	0	30	30	AAACAGCATGA	30	41	11	C	41	42	1	TTTTTCAAGAGTGCCATGCCCGAAG	42	67	25	G	67	68	1		68	68	0	TCATGCTGTTT	68	79	11	GC	79	81	2
519	caatgcttctcgtgatacccagatcatatgaaacagcatgactttttcaagagtgccatgcccgaaggCCATGCCCGAAGG	1	caatgcttctcgtgatacccagatcatatgaaaca actttttcaagagt gcatg g CGTACCggaagcccgtacc GGAAGCC	CAATGCTTCTCGTGATACCCAGATCATATGAAACA	0	35	35	GCATG	35	40	5		40	40	0	ACTTTTTCAAGAGTGCCATGCCCGAAGG	40	68	28		68	68	0	C	68	69	1	CATGC	69	74	5	CCGAAGG	74	81	7
520	caatgcttctcgtgatacccagatcatatgaaacagcatgactttttcaagagtgccatgcccgaaggGAAGCATTGG	1	tcgtgatacccagatcatatgaaacagca caatgcttc t GTTACGAAGggaagcccgtaccgtgagaactttttcag G		0	0	0	CAATGCTTC	0	9	9		9	9	0	TCGTGATACCCAGATCATATGAAACAGCATGACTTTTTCAAGAGTGCCATGCCCGAAGG	9	68	59		68	68	0		68	68	0	GAAGCATTG	68	77	9	G	77	78	1
521	caatgcttctcgtgatacccagatcatatgaaacagcatgactttttcaagagtgccatgcccgaaggGCAATGCT	1	caatgcttctcgtgatacccagatcatatgaaacagcatgactttttcaagagtgcca g tgccc a ACGgga TCGTA	CAATGCTTCTCGTGATACCCAGATCATATGAAACAGCATGACTTTTTCAAGAGTGCCA	0	58	58	TGC	58	61	3	CC	61	63	2	GAA	63	66	3	GG	66	68	2		68	68	0	GCA	68	71	3	ATGCT	71	76	5
522	caatgcttctcgtgatacccagatcatatgaaacagcatgactttttcaagagtgccatgcccgaaggGTATCCCGAGA	1	caatgcttctcgt agatcatatgaaacagcatgac gataccc t CTATGgg t AGAGCC aagcccgtaccgtgagaacttt	CAATGCTTCTCGT	0	13	13	GATAC	13	18	5	CC	18	20	2	AGATCATATGAAACAGCATGACTTTTTCAAGAGTGCCATGCCCGAA	20	66	46	GG	66	68	2		68	68	0	GTATC	68	73	5	CCGAGA	73	79	6
523	caatgcttctcgtgatacccagatcatatgaaacagcatgactttttcaagagtgccatgcccgaaggCCACTCTTGAAAAAGTCATGCTGTT	1	caatgcttctcgtgatacccagatcatatga atgc aacagcatgactttttcaagagtg-cc c TTGTCGTACTGAAAAAGTTCTCACCggaagc	CAATGCTTCTCGTGATACCCAGATCATATGA	0	31	31	AACAGCATGACTTTTTCAAGAGTG	31	55	24	CC	55	57	2	ATGCCCGAA	57	66	9	GG	66	68	2	C	68	69	1	CACTCTTGAAAAAGTCATGCTGTT	69	93	24		93	93	0
524	caatgcttctcgtgatacccagatcatatgaaacagcatgactttttcaagagtgccatgcccgaaggTCATGCTGTTTCATATGAC	1	caatgcttctcgtgatacccaga tttttcaagagt tcatatgaaacagcatgac g AGTATACTTTGTCGTACTggaagcccgtacc C	CAATGCTTCTCGTGATACCCAGA	0	23	23	TCATATGAAACAGCATGA	23	41	18	C	41	42	1	TTTTTCAAGAGTGCCATGCCCGAAG	42	67	25	G	67	68	1		68	68	0	TCATGCTGTTTCATATGA	68	86	18	C	86	87	1
525	caatgcttctcgtgatacccagatcatatgaaacagcatgactttttcaagagtgccatgcccgaaggCACTCTTGAAAAGTTCCTTCAAGAGTGCCTTCG	1	caatgcttctcgtgatacccagatcatatgaaacagcatgact atgc ttttcaagagtgcc c AAAAGTTCTCACggaagc GCTTCCGTGAGAACTTCCTTG	CAATGCTTCTCGTGATACCCAGATCATATGAAACAGCATGACT	0	43	43	TTTTCAAGAGTG	43	55	12	CC	55	57	2	ATGCCCGAA	57	66	9	GG	66	68	2		68	68	0	CACTCTTGAAAA	68	80	12	GTTCCTTCAAGAGTGCCTTCG	80	101	21
526	caatgcttctcgtgatacccagatcatatgaaacagcatgactttttcaagagtgccatgcccgaaggGTCAATGCTTC	1	caatgcttctcgtgatacccagatcatatgaaacagca tttttcaagagt tgac g ACTG c CTTCGTA ggaagcccgtac	CAATGCTTCTCGTGATACCCAGATCATATGAAACAGCA	0	38	38	TGAC	38	42	4		42	42	0	TTTTTCAAGAGTGCCATGCCCGAAGG	42	68	26		68	68	0		68	68	0	GTCA	68	72	4	ATGCTTC	72	79	7
527	caatgcttctcgtgatacccagatcatatgaaacagcatgactttttcaagagtgccatgcccgaaggCATTGGAC	1	ttctcgtgatacccagatcatatgaaacag caatgc c GTTACggaagcccgtaccgtgagaactttttcagta CAG		0	0	0	CAATG	0	5	5	C	5	6	1	TTCTCGTGATACCCAGATCATATGAAACAGCATGACTTTTTCAAGAGTGCCATGCCCGAAG	6	67	61	G	67	68	1		68	68	0	CATTG	68	73	5	GAC	73	76	3
528	caatgcttctcgtgatacccagatcatatgaaacagcatgactttttcaagagtgccatgcccgaaggGTGA	1	caatgcttctcgtgat agatcatatgaaacagcatgac accc t TGgg t AG aagcccgtaccgtgagaacttt	CAATGCTTCTCGTGAT	0	16	16	AC	16	18	2	CC	18	20	2	AGATCATATGAAACAGCATGACTTTTTCAAGAGTGCCATGCCCGAA	20	66	46	GG	66	68	2		68	68	0	GT	68	70	2	GA	70	72	2
529	caatgcttctcgtgatacccagatcatatgaaacagcatgactttttcaagagtgccatgcccgaaggCATGGCACGGCAC	1	caatgcttctcgtgatacccagatcatatgaaacagcatgactttttcaaga c gtgccatgcc g CACGGTACgg a CACGG a	CAATGCTTCTCGTGATACCCAGATCATATGAAACAGCATGACTTTTTCAAGA	0	52	52	GTGCCATG	52	60	8	CC	60	62	2	CGAA	62	66	4	GG	66	68	2		68	68	0	CATGGCAC	68	76	8	GGCAC	76	81	5
530	caatgcttctcgtgatacccagatcatatgaaacagcatgactttttcaagagtgccatgcccgaaggTATCACGAGAAGCATTGAC	1	cagatcatatgaaacagcatgac caatgcttctcgtgatacc t GTTACGAAGAGCACTATggaagcccgtaccgtgagaactttt CA		0	0	0	CAATGCTTCTCGTGATA	0	17	17	CC	17	19	2	CAGATCATATGAAACAGCATGACTTTTTCAAGAGTGCCATGCCCGAA	19	66	47	GG	66	68	2		68	68	0	TATCACGAGAAGCATTG	68	85	17	AC	85	87	2
531	caatgcttctcgtgatacccagatcatatgaaacagcatgactttttcaagagtgccatgcccgaaggCATTGAAAAAGTCATGCCTTCGGGCATGACTTTAAT	1	caatgcttctcgtgatacccagatcatatgaaaca gagtgccat gcatgactttttcaa g CGTACTGAAAAAGTT c TAATTTCAGTACGGGCTTC ACggaagcc	CAATGCTTCTCGTGATACCCAGATCATATGAAACA	0	35	35	GCATGACTTTTTCAA	35	50	15		50	50	0	GAGTGCCATGCCCGAAGG	50	68	18		68	68	0	CA	68	70	2	TTGAAAAAGTCATGC	70	85	15	CTTCGGGCATGACTTTAAT	85	104	19
532	caatgcttctcgtgatacccagatcatatgaaacagcatgactttttcaagagtgccatgcccgaaggCATTGGTA	1	ttctcgtgatacccagatcatatgaaacag caatgc c GTTACggaagcccgtaccgtgagaactttttcagta ATG		0	0	0	CAATG	0	5	5	C	5	6	1	TTCTCGTGATACCCAGATCATATGAAACAGCATGACTTTTTCAAGAGTGCCATGCCCGAAG	6	67	61	G	67	68	1		68	68	0	CATTG	68	73	5	GTA	73	76	3
533	caatgcttctcgtgatacccagatcatatgaaacagcatgactttttcaagagtgccatgcccgaaggCCGC	1	caatgcttctcgtgatacccagatcatatgaaacagcatgactttttcaagagtgccatgcccgaag g C CGC	CAATGCTTCTCGTGATACCCAGATCATATGAAACAGCATGACTTTTTCAAGAGTGCCATGCCCGAAGG	0	68	68		68	68	0		68	68	0		68	68	0		68	68	0		72	72	0		72	72	0		72	72	0
534	caatgcttctcgtgatacccagatcatatgaaacagcatgactttttcaagagtgccatgcccgaaggGCATGGCACTCATGAAAAA	1	caatgcttctcgtgatacccagatcatatgaaacagcatgactttttcaa g gagtgccatgccc a CTCACGGTACGgga AAAAAGTA	CAATGCTTCTCGTGATACCCAGATCATATGAAACAGCATGACTTTTTCAA	0	50	50	GAGTGCCATGC	50	61	11	CC	61	63	2	GAA	63	66	3	GG	66	68	2		68	68	0	GCATGGCACTC	68	79	11	ATGAAAAA	79	87	8
535	caatgcttctcgtgatacccagatcatatgaaacagcatgactttttcaagagtgccatgcccgaaggGGCATGGCACTGCAATGCTTCGGGCATGGCACTCTT	1	caatgcttctcgtgatacccagatcatatgaaacagcatgactttttcaag g agtgccatgccc a TCACGGTACGGg a TTCTCACGGTACGGGCTTCGTAACG g	CAATGCTTCTCGTGATACCCAGATCATATGAAACAGCATGACTTTTTCAAG	0	51	51	AGTGCCATGCC	51	62	11	C	62	63	1	GAAG	63	67	4	G	67	68	1		68	68	0	GGCATGGCACT	68	79	11	GCAATGCTTCGGGCATGGCACTCTT	79	104	25
536	caatgcttctcgtgatacccagatcatatgaaacagcatgactttttcaagagtgccatgcccgaaggTCATGCTGTTTCATGTGATCTGGGTATC	1	caatgcttctcgtgatacccagatcat tttttcaagagt atgaaacagcatgac g TACTTTGTCGTACTggaagcccgtacc CTATGGGTCTAGTG	CAATGCTTCTCGTGATACCCAGATCAT	0	27	27	ATGAAACAGCATGA	27	41	14	C	41	42	1	TTTTTCAAGAGTGCCATGCCCGAAG	42	67	25	G	67	68	1		68	68	0	TCATGCTGTTTCAT	68	82	14	GTGATCTGGGTATC	82	96	14
537	caatgcttctcgtgatacccagatcatatgaaacagcatgactttttcaagagtgccatgcccgaaggGAACAGCC	1	caatgcttctcgtgatacccagatcatatgaaacagcatgacttt aagagtgcc ttc a AAG t CCGAC ggaagcccg	CAATGCTTCTCGTGATACCCAGATCATATGAAACAGCATGACTTT	0	45	45	TTC	45	48	3		48	48	0	AAGAGTGCCATGCCCGAAGG	48	68	20		68	68	0		68	68	0	GAA	68	71	3	CAGCC	71	76	5
538	caatgcttctcgtgatacccagatcatatgaaacagcatgactttttcaagagtgccatgcccgaaggGCACGGCACTCTTGAAAAAG	1	caatgcttctcgtgatacccagatcatatgaaacagcatga atgcccg ctttttcaagagtgcc a GAAAAAGTTCTCACGGCACGgga	CAATGCTTCTCGTGATACCCAGATCATATGAAACAGCATGA	0	41	41	CTTTTTCAAGAGTGCC	41	57	16		57	57	0	ATGCCCGAAGG	57	68	11		68	68	0	GCAC	68	72	4	GGCACTCTTGAAAAAG	72	88	16		88	88	0
539	caatgcttctcgtgatacccagatcatatgaaacagcatgactttttcaagagtgccatgcccgaaggGGTGATTTCC	1	caatgcttctcgtgat agatcatatgaaacagcatgact accc t TGGggaagcccgtaccgtgagaacttt CCTTTAG	CAATGCTTCTCGTGAT	0	16	16	ACC	16	19	3	C	19	20	1	AGATCATATGAAACAGCATGACTTTTTCAAGAGTGCCATGCCCGAAG	20	67	47	G	67	68	1		68	68	0	GGT	68	71	3	GATTTCC	71	78	7
540	caatgcttctcgtgatacccagatcatatgaaacagcatgactttttcaagagtgccatgcccgaaggCCTCTTGAAAAAAGAGGCCTTCGGGCAT	1	caatgcttctcgtgatacccagatcatatgaaacagcatgac tgccatg tttttcaagag c AAAAAGTTCTC c TACGGGCTTCCGGAGA Cggaagc	CAATGCTTCTCGTGATACCCAGATCATATGAAACAGCATGAC	0	42	42	TTTTTCAAGAG	42	53	11		53	53	0	TGCCATGCCCGAAGG	53	68	15		68	68	0	C	68	69	1	CTCTTGAAAAA	69	80	11	AGAGGCCTTCGGGCAT	80	96	16
541	caatgcttctcgtgatacccagatcatatgaaacagcatgactttttcaagagtgccatgcccgaaggCATGGCACTTCGGGCATGGC	1	caatgcttctcgtgatacccagatcatatgaaacagcatgactttttcaag c agtgccatgcc g TCACGGTACgg a CGGTACGGGCT a	CAATGCTTCTCGTGATACCCAGATCATATGAAACAGCATGACTTTTTCAAG	0	51	51	AGTGCCATG	51	60	9	CC	60	62	2	CGAA	62	66	4	GG	66	68	2		68	68	0	CATGGCACT	68	77	9	TCGGGCATGGC	77	88	11
542	caatgcttctcgtgatacccagatcatatgaaacagcatgactttttcaagagtgccatgcccgaaggGCACTCTTGAGTCATGCTGTTTCATAT	1	caatgcttctcgtgatacccagatcatatgaaacagcatgactttt atgc tcaagagtgcc c AGTTCTCACGg c TATACTTTGTCGTACTG gaag	CAATGCTTCTCGTGATACCCAGATCATATGAAACAGCATGACTTTT	0	46	46	TCAAGAGTGC	46	56	10	C	56	57	1	ATGCCCGAAG	57	67	10	G	67	68	1		68	68	0	GCACTCTTGA	68	78	10	GTCATGCTGTTTCATAT	78	95	17
543	caatgcttctcgtgatacccagatcatatgaaacagcatgactttttcaagagtgccatgcccgaaggGTCATGCTGTTTCATATGATA	1	caatgcttctcgtgatacccag tttttcaagagt atcatatgaaacagcatgac g TAGTATACTTTGTCGTACTG c A ggaagcccgtac	CAATGCTTCTCGTGATACCCAG	0	22	22	ATCATATGAAACAGCATGAC	22	42	20		42	42	0	TTTTTCAAGAGTGCCATGCCCGAAGG	42	68	26		68	68	0		68	68	0	GTCATGCTGTTTCATATGAT	68	88	20	A	88	89	1
544	caatgcttctcgtgatacccagatcatatgaaacagcatgactttttcaagagtgccatgcccgaaggGTCATGCTGTTTCATATGATCTGGGTG	1	caatgcttctcgtgat tttttcaagagt acccagatcatatgaaacagcatgac g TGGGTCTAGTATACTTTGTCGTACTG c G ggaagcccgtac	CAATGCTTCTCGTGAT	0	16	16	ACCCAGATCATATGAAACAGCATGAC	16	42	26		42	42	0	TTTTTCAAGAGTGCCATGCCCGAAGG	42	68	26		68	68	0		68	68	0	GTCATGCTGTTTCATATGATCTGGGT	68	94	26	G	94	95	1
545	caatgcttctcgtgatacccagatcatatgaaacagcatgactttttcaagagtgccatgcccgaaggCACTCTTGAAAAAGTCATCATGCTGTTTCATATGATCT	1	caatgcttctcgtgatacccagatcatatgaaacagc atgc atgactttttcaagagtgcc c TACTGAAAAAGTTCTCACggaagc TCTAGTATACTTTGTCGTAC	CAATGCTTCTCGTGATACCCAGATCATATGAAACAGC	0	37	37	ATGACTTTTTCAAGAGTG	37	55	18	CC	55	57	2	ATGCCCGAA	57	66	9	GG	66	68	2		68	68	0	CACTCTTGAAAAAGTCAT	68	86	18	CATGCTGTTTCATATGATCT	86	106	20
546	caatgcttctcgtgatacccagatcatatgaaacagcatgactttttcaagagtgccatgcccgaaggCCATGCTGTTTCATATGATCTA	1	caatgcttctcgtgataccc actttttcaagagt agatcatatgaaacagcatg g TCTAGTATACTTTGTCGTACCggaagcccgtacc A	CAATGCTTCTCGTGATACCC	0	20	20	AGATCATATGAAACAGCATG	20	40	20		40	40	0	ACTTTTTCAAGAGTGCCATGCCCGAAGG	40	68	28		68	68	0	C	68	69	1	CATGCTGTTTCATATGATCT	69	89	20	A	89	90	1
547	caatgcttctcgtgatacccagatcatatgaaacagcatgactttttcaagagtgccatgcccgaaggCATT	1	c ttctcgtgatacccagatcatatgaaacag aatgc c TTACggaagcccgtaccgtgagaactttttcagta	C	0	1	1	AATG	1	5	4	C	5	6	1	TTCTCGTGATACCCAGATCATATGAAACAGCATGACTTTTTCAAGAGTGCCATGCCCGAAG	6	67	61	G	67	68	1		68	68	0	CATT	68	72	4		72	72	0
548	caatgcttctcgtgatacccagatcatatgaaacagcatgactttttcaagagtgccatgcccgaaggCCATGCTGTTTCATATG	1	caatgcttctcgtgatacccagat actttttcaagagt catatgaaacagcatg g GTATACTTTGTCGTACCggaagcccgtacc	CAATGCTTCTCGTGATACCCAGAT	0	24	24	CATATGAAACAGCATG	24	40	16		40	40	0	ACTTTTTCAAGAGTGCCATGCCCGAAGG	40	68	28		68	68	0	C	68	69	1	CATGCTGTTTCATATG	69	85	16		85	85	0
549	caatgcttctcgtgatacccagatcatatgaaacagcatgactttttcaagagtgccatgcccgaaggCAATGCTTCTCGTGATACCCAGATCATA	1	caatgcttctcgtgatacccagatcatatgaaacagcatgactttttcaagagtgcca c tgcc g ACgg a ATACTAGACCCATAGTGCTCTTCGTA a	CAATGCTTCTCGTGATACCCAGATCATATGAAACAGCATGACTTTTTCAAGAGTGCCA	0	58	58	TG	58	60	2	CC	60	62	2	CGAA	62	66	4	GG	66	68	2		68	68	0	CA	68	70	2	ATGCTTCTCGTGATACCCAGATCATA	70	96	26
550	caatgcttctcgtgatacccagatcatatgaaacagcatgactttttcaagagtgccatgcccgaaggCCATGCTGTTTCATT	1	caatgcttctcgtgatacccagatcat actttttcaagagt atgaaacagcatg g TACTTTGTCGTACCggaagcccgtacc T	CAATGCTTCTCGTGATACCCAGATCAT	0	27	27	ATGAAACAGCATG	27	40	13		40	40	0	ACTTTTTCAAGAGTGCCATGCCCGAAGG	40	68	28		68	68	0	C	68	69	1	CATGCTGTTTCAT	69	82	13	T	82	83	1
551	caatgcttctcgtgatacccagatcatatgaaacagcatgactttttcaagagtgccatgcccgaaggTCATGCTGTTTCAG	1	caatgcttctcgtgatacccagatcata tttttcaagagt tgaaacagcatgac g ACTTTGTCGTACTggaagcccgtacc G	CAATGCTTCTCGTGATACCCAGATCATA	0	28	28	TGAAACAGCATGA	28	41	13	C	41	42	1	TTTTTCAAGAGTGCCATGCCCGAAG	42	67	25	G	67	68	1		68	68	0	TCATGCTGTTTCA	68	81	13	G	81	82	1
552	caatgcttctcgtgatacccagatcatatgaaacagcatgactttttcaagagtgccatgcccgaaggGTCATGCTGTTTCATATGATCTGGGTATCA	1	caatgcttctcg tttttcaagagt tgatacccagatcatatgaaacagcatgac g ACTATGGGTCTAGTATACTTTGTCGTACTG c ggaagcccgtac	CAATGCTTCTCG	0	12	12	TGATACCCAGATCATATGAAACAGCATGAC	12	42	30		42	42	0	TTTTTCAAGAGTGCCATGCCCGAAGG	42	68	26		68	68	0		68	68	0	GTCATGCTGTTTCATATGATCTGGGTATCA	68	98	30		98	98	0
553	caatgcttctcgtgatacccagatcatatgaaacagcatgactttttcaagagtgccatgcccgaaggGTATCACGAGAAGCATTGAGA	1	agatcatatgaaacagcatgac caatgcttctcgtgataccc t GTTACGAAGAGCACTATGgg t AGA aagcccgtaccgtgagaacttt		0	0	0	CAATGCTTCTCGTGATAC	0	18	18	CC	18	20	2	AGATCATATGAAACAGCATGACTTTTTCAAGAGTGCCATGCCCGAA	20	66	46	GG	66	68	2		68	68	0	GTATCACGAGAAGCATTG	68	86	18	AGA	86	89	3
554	caatgcttctcgtgatacccagatcatatgaaacagcatgactttttcaagagtgccatgcccgaaggTCATGCTGTTTCAGCATGACCTTCGGGCAT	1	caatgcttctcgtgatacccagatcata tttttcaagagt tgaaacagcatgac g ACTTTGTCGTACTggaagcccgtacc TACGGGCTTCCAGTACG	CAATGCTTCTCGTGATACCCAGATCATA	0	28	28	TGAAACAGCATGA	28	41	13	C	41	42	1	TTTTTCAAGAGTGCCATGCCCGAAG	42	67	25	G	67	68	1		68	68	0	TCATGCTGTTTCA	68	81	13	GCATGACCTTCGGGCAT	81	98	17
555	caatgcttctcgtgatacccagatcatatgaaacagcatgactttttcaagagtgccatgcccgaaggGCATTGAACTCC	1	ttctcgtgatacccagatcatatgaaacag caatgc c GTTACG a CCTCAA ggaagcccgtaccgtgagaactttttcagt		0	0	0	CAATGC	0	6	6		6	6	0	TTCTCGTGATACCCAGATCATATGAAACAGCATGACTTTTTCAAGAGTGCCATGCCCGAAGG	6	68	62		68	68	0		68	68	0	GCATTG	68	74	6	AACTCC	74	80	6
556	caatgcttctcgtgatacccagatcatatgaaacagcatgactttttcaagagtgccatgcccgaaggCATGGCAGTCTTGAAAAA	1	caatgcttctcgtgatacccagatcatatgaaacagcatgactttttcaagag c tgccatgcc g ACGGTACgg a AAAAAGTTCTG a	CAATGCTTCTCGTGATACCCAGATCATATGAAACAGCATGACTTTTTCAAGAG	0	53	53	TGCCATG	53	60	7	CC	60	62	2	CGAA	62	66	4	GG	66	68	2		68	68	0	CATGGCA	68	75	7	GTCTTGAAAAA	75	86	11
557	caatgcttctcgtgatacccagatcatatgaaacagcatgactttttcaagagtgccatgcccgaaggCATGGCACTCTTGAAGA	1	caatgcttctcgtgatacccagatcatatgaaacagcatgacttt c ttcaagagtgccatgcc g AAGTTCTCACGGTACgg a AG a	CAATGCTTCTCGTGATACCCAGATCATATGAAACAGCATGACTTT	0	45	45	TTCAAGAGTGCCATG	45	60	15	CC	60	62	2	CGAA	62	66	4	GG	66	68	2		68	68	0	CATGGCACTCTTGAA	68	83	15	GA	83	85	2
558	caatgcttctcgtgatacccagatcatatgaaacagcatgactttttcaagagtgccatgcccgaaggGTATCAG	1	caatgcttctcg agatcatatgaaacagcatgac tgataccc t ACTATGgg t G aagcccgtaccgtgagaacttt	CAATGCTTCTCG	0	12	12	TGATAC	12	18	6	CC	18	20	2	AGATCATATGAAACAGCATGACTTTTTCAAGAGTGCCATGCCCGAA	20	66	46	GG	66	68	2		68	68	0	GTATCA	68	74	6	G	74	75	1
559	caatgcttctcgtgatacccagatcatatgaaacagcatgactttttcaagagtgccatgcccgaaggGGCGTGGCACTCTTGAAAAA	1	caatgcttctcgtgatacccagatcatatgaaacagcatgac tgcccg tttttcaagagtgcca a AAAAAGTTCTCACGGT a GCGGgg	CAATGCTTCTCGTGATACCCAGATCATATGAAACAGCATGAC	0	42	42	TTTTTCAAGAGTGCCA	42	58	16		58	58	0	TGCCCGAAGG	58	68	10		68	68	0	GGCG	68	72	4	TGGCACTCTTGAAAAA	72	88	16		88	88	0
560	caatgcttctcgtgatacccagatcatatgaaacagcatgactttttcaagagtgccatgcccgaaggCCATGCTGTTTCATACAGCATGGCCTTC	1	caatgcttctcgtgatacccagatca actttttcaagagt tatgaaacagcatg g ATACTTTGTCGTACCggaagcccgtacc CTTCCGGTACGAC	CAATGCTTCTCGTGATACCCAGATCA	0	26	26	TATGAAACAGCATG	26	40	14		40	40	0	ACTTTTTCAAGAGTGCCATGCCCGAAGG	40	68	28		68	68	0	C	68	69	1	CATGCTGTTTCATA	69	83	14	CAGCATGGCCTTC	83	96	13
561	caatgcttctcgtgatacccagatcatatgaaacagcatgactttttcaagagtgccatgcccgaaggGTAAAA	1	caatgcttctcgtga agatcatatgaaacagcatgac taccc t ATGgg t AAA aagcccgtaccgtgagaacttt	CAATGCTTCTCGTGA	0	15	15	TAC	15	18	3	CC	18	20	2	AGATCATATGAAACAGCATGACTTTTTCAAGAGTGCCATGCCCGAA	20	66	46	GG	66	68	2		68	68	0	GTA	68	71	3	AAA	71	74	3
562	caatgcttctcgtgatacccagatcatatgaaacagcatgactttttcaagagtgccatgcccgaaggCCATGGCACTCTTGAAAAAGTCATG	1	caatgcttctcgtgatacccagatcatatgaaacag c catgactttttcaagagtgccatg-cc g GTACTGAAAAAGTTCTCACGGTACCgg a a	CAATGCTTCTCGTGATACCCAGATCATATGAAACAG	0	36	36	CATGACTTTTTCAAGAGTGCCATG	36	60	24	CC	60	62	2	CGAA	62	66	4	GG	66	68	2	C	68	69	1	CATGGCACTCTTGAAAAAGTCATG	69	93	24		93	93	0
563	caatgcttctcgtgatacccagatcatatgaaacagcatgactttttcaagagtgccatgcccgaaggGGCATGGCACTCCTTCGGGCAT	1	caatgcttctcgtgatacccagatcatatgaaacagcatgactttttcaa g gagtgccatgccc a CTCACGGTACGGg a TACGGGCTTC g	CAATGCTTCTCGTGATACCCAGATCATATGAAACAGCATGACTTTTTCAA	0	50	50	GAGTGCCATGCC	50	62	12	C	62	63	1	GAAG	63	67	4	G	67	68	1		68	68	0	GGCATGGCACTC	68	80	12	CTTCGGGCAT	80	90	10
564	caatgcttctcgtgatacccagatcatatgaaacagcatgactttttcaagagtgccatgcccgaaggCATGGCACTCTAGAAAAAGTCTAGAGTGCCATGCCCGAAACAG	1	caatgcttctcgtgatacccagatcatatgaaacagcatgactttttca c agagtgccatgcc g TCTCACGGTACgg a GACAAAGCCCGTACCGTGAGATCTGAAAAAGA a	CAATGCTTCTCGTGATACCCAGATCATATGAAACAGCATGACTTTTTCA	0	49	49	AGAGTGCCATG	49	60	11	CC	60	62	2	CGAA	62	66	4	GG	66	68	2		68	68	0	CATGGCACTCT	68	79	11	AGAAAAAGTCTAGAGTGCCATGCCCGAAACAG	79	111	32
565	caatgcttctcgtgatacccagatcatatgaaacagcatgactttttcaagagtgccatgcccgaaggGCACTCTTGAAAAAGTCATGCTGTTTC	1	caatgcttctcgtgatacccagatcatat atgc gaaacagcatgactttttcaagagtgcc c CTTTGTCGTACTGAAAAAGTTCTCACGg c gaag	CAATGCTTCTCGTGATACCCAGATCATAT	0	29	29	GAAACAGCATGACTTTTTCAAGAGTGC	29	56	27	C	56	57	1	ATGCCCGAAG	57	67	10	G	67	68	1		68	68	0	GCACTCTTGAAAAAGTCATGCTGTTTC	68	95	27		95	95	0
566	caatgcttctcgtgatacccagatcatatgaaacagcatgactttttcaagagtgccatgcccgaaggGCACTCTTGAAAAAGTCAA	1	caatgcttctcgtgatacccagatcatatgaaacagca atgc tgactttttcaagagtgcc c ACTGAAAAAGTTCTCACGg c A gaag	CAATGCTTCTCGTGATACCCAGATCATATGAAACAGCA	0	38	38	TGACTTTTTCAAGAGTGC	38	56	18	C	56	57	1	ATGCCCGAAG	57	67	10	G	67	68	1		68	68	0	GCACTCTTGAAAAAGTCA	68	86	18	A	86	87	1
567	caatgcttctcgtgatacccagatcatatgaaacagcatgactttttcaagagtgccatgcccgaaggTCATGCTGTTTCATAGATCTGGGTATCT	1	caatgcttctcgtgatacccagatca tttttcaagagt tatgaaacagcatgac g ATACTTTGTCGTACTggaagcccgtacc TCTATGGGTCTAG	CAATGCTTCTCGTGATACCCAGATCA	0	26	26	TATGAAACAGCATGA	26	41	15	C	41	42	1	TTTTTCAAGAGTGCCATGCCCGAAG	42	67	25	G	67	68	1		68	68	0	TCATGCTGTTTCATA	68	83	15	GATCTGGGTATCT	83	96	13
568	caatgcttctcgtgatacccagatcatatgaaacagcatgactttttcaagagtgccatgcccgaaggGGCAAGGCACTCTTGAAAAAGTC	1	caatgcttctcgtgatacccagatcatatgaaacagcat atgcccg gactttttcaagagtgcc a CTGAAAAAGTTCTCACGG a AACGGgg	CAATGCTTCTCGTGATACCCAGATCATATGAAACAGCAT	0	39	39	GACTTTTTCAAGAGTGCC	39	57	18		57	57	0	ATGCCCGAAGG	57	68	11		68	68	0	GGCAA	68	73	5	GGCACTCTTGAAAAAGTC	73	91	18		91	91	0
569	caatgcttctcgtgatacccagatcatatgaaacagcatgactttttcaagagtgccatgcccgaaggGCATGGCGCTCTTGAAAAAGTCAT	1	caatgcttctcgtgatacccagatcatatgaaacagcatgactttttcaagagt g gccatgccc a CGGTACGgga TACTGAAAAAGTTCTCG	CAATGCTTCTCGTGATACCCAGATCATATGAAACAGCATGACTTTTTCAAGAGT	0	54	54	GCCATGC	54	61	7	CC	61	63	2	GAA	63	66	3	GG	66	68	2		68	68	0	GCATGGC	68	75	7	GCTCTTGAAAAAGTCAT	75	92	17
570	caatgcttctcgtgatacccagatcatatgaaacagcatgactttttcaagagtgccatgcccgaaggCACTCTTGAA	1	caatgcttctcgtgatacccagatcatatgaaacagcatgacttt atgc ttcaagagtgcc c AAGTTCTCACggaagc	CAATGCTTCTCGTGATACCCAGATCATATGAAACAGCATGACTTT	0	45	45	TTCAAGAGTG	45	55	10	CC	55	57	2	ATGCCCGAA	57	66	9	GG	66	68	2		68	68	0	CACTCTTGAA	68	78	10		78	78	0
571	caatgcttctcgtgatacccagatcatatgaaacagcatgactttttcaagagtgccatgcccgaaggCAA	1	caatgcttctcgtgatacccagatcatatgaaacagcatgactttttcaagagtgcca c tgcc g ACgg a A a	CAATGCTTCTCGTGATACCCAGATCATATGAAACAGCATGACTTTTTCAAGAGTGCCA	0	58	58	TG	58	60	2	CC	60	62	2	CGAA	62	66	4	GG	66	68	2		68	68	0	CA	68	70	2	A	70	71	1
572	caatgcttctcgtgatacccagatcatatgaaacagcatgactttttcaagagtgccatgcccgaaggGTATCCTTCGGGCAT	1	caatgcttctcgtgatacccagatcatatgaaacagcatgactttttcaagagtgcc G atgcccgaagg T TACGGGCTTCC A T	CAATGCTTCTCGTGATACCCAGATCATATGAAACAGCATGACTTTTTCAAGAGTGCC	0	57	57	ATGCCCGAAGG	57	68	11		68	68	0		68	68	0		68	68	0	GTAT	68	72	4	CCTTCGGGCAT	72	83	11		83	83	0
573	caatgcttctcgtgatacccagatcatatgaaacagcatgactttttcaagagtgccatgcccgaaggGTCATGGCACTCTTGAAAAAGTCATGCT	1	caatgcttctcgtgatacccagatcatatgaaac c agcatgactttttcaagagtgccatg--cc g TCGTACTGAAAAAGTTCTCACGGTACTGgg a a	CAATGCTTCTCGTGATACCCAGATCATATGAAAC	0	34	34	AGCATGACTTTTTCAAGAGTGCCATG	34	60	26	CC	60	62	2	CGAA	62	66	4	GG	66	68	2	GT	68	70	2	CATGGCACTCTTGAAAAAGTCATGCT	70	96	26		96	96	0
574	caatgcttctcgtgatacccagatcatatgaaacagcatgactttttcaagagtgccatgcccgaaggGCACTCTTGAAAAAGTCATGCTG	1	caatgcttctcgtgatacccagatcatatgaaa atgc cagcatgactttttcaagagtgcc c GTCGTACTGAAAAAGTTCTCACGg c gaag	CAATGCTTCTCGTGATACCCAGATCATATGAAA	0	33	33	CAGCATGACTTTTTCAAGAGTGC	33	56	23	C	56	57	1	ATGCCCGAAG	57	67	10	G	67	68	1		68	68	0	GCACTCTTGAAAAAGTCATGCTG	68	91	23		91	91	0
575	caatgcttctcgtgatacccagatcatatgaaacagcatgactttttcaagagtgccatgcccgaaggCCATGCTGTTTCATATGG	1	caatgcttctcgtgatacccagat actttttcaagagt catatgaaacagcatg g GTATACTTTGTCGTACCggaagcccgtacc G	CAATGCTTCTCGTGATACCCAGAT	0	24	24	CATATGAAACAGCATG	24	40	16		40	40	0	ACTTTTTCAAGAGTGCCATGCCCGAAGG	40	68	28		68	68	0	C	68	69	1	CATGCTGTTTCATATG	69	85	16	G	85	86	1
576	caatgcttctcgtgatacccagatcatatgaaacagcatgactttttcaagagtgccatgcccgaaggGGCATGGCACTCTTGAAAGTCATCT	1	caatgcttctcgtgatacccagatcatatgaaacagcatgactt g tttcaagagtgccatgccc a AAAGTTCTCACGGTACGGg a TCTACTG g	CAATGCTTCTCGTGATACCCAGATCATATGAAACAGCATGACTT	0	44	44	TTTCAAGAGTGCCATGCC	44	62	18	C	62	63	1	GAAG	63	67	4	G	67	68	1		68	68	0	GGCATGGCACTCTTGAAA	68	86	18	GTCATCT	86	93	7
577	caatgcttctcgtgatacccagatcatatgaaacagcatgactttttcaagagtgccatgcccgaaggCCCTCTTGAAAAAGTCATGCTGTTTCAT	1	caatgcttctcgtgatacccagatcat tgccatgc atgaaacagcatgactttttcaagag c TACTTTGTCGTACTGAAAAAGTTCTCCCggaagc	CAATGCTTCTCGTGATACCCAGATCAT	0	27	27	ATGAAACAGCATGACTTTTTCAAGAG	27	53	26		53	53	0	TGCCATGCCCGAAGG	53	68	15		68	68	0	CC	68	70	2	CTCTTGAAAAAGTCATGCTGTTTCAT	70	96	26		96	96	0
578	caatgcttctcgtgatacccagatcatatgaaacagcatgactttttcaagagtgccatgcccgaaggGGGCATGGCACTCTTGAAATA	1	caatgcttctcgtgatacccagatcatatgaaacagcatgactt ga tttcaagagtgccatgccc a AAAGTTCTCACGGTACGGGgg AT	CAATGCTTCTCGTGATACCCAGATCATATGAAACAGCATGACTT	0	44	44	TTTCAAGAGTGCCATGCCC	44	63	19		63	63	0	GAAGG	63	68	5		68	68	0		68	68	0	GGGCATGGCACTCTTGAAA	68	87	19	TA	87	89	2
579	caatgcttctcgtgatacccagatcatatgaaacagcatgactttttcaagagtgccatgcccgaaggCCATGCTGTTTCATATGATCTGGGTAT	1	caatgcttctcgtg actttttcaagagt atacccagatcatatgaaacagcatg g TATGGGTCTAGTATACTTTGTCGTACCggaagcccgtacc	CAATGCTTCTCGTG	0	14	14	ATACCCAGATCATATGAAACAGCATG	14	40	26		40	40	0	ACTTTTTCAAGAGTGCCATGCCCGAAGG	40	68	28		68	68	0	C	68	69	1	CATGCTGTTTCATATGATCTGGGTAT	69	95	26		95	95	0
580	caatgcttctcgtgatacccagatcatatgaaacagcatgactttttcaagagtgccatgcccgaaggTCTCTTGAAAAAGTCCTTCGGGC	1	caatgcttctcgtgatacccagatcatatgaaacagcat tgccatg gactttttcaagag c CTGAAAAAGTTCTC c CGGGCTTC Tggaagc	CAATGCTTCTCGTGATACCCAGATCATATGAAACAGCAT	0	39	39	GACTTTTTCAAGAG	39	53	14		53	53	0	TGCCATGCCCGAAGG	53	68	15		68	68	0	T	68	69	1	CTCTTGAAAAAGTC	69	83	14	CTTCGGGC	83	91	8
581	caatgcttctcgtgatacccagatcatatgaaacagcatgactttttcaagagtgccatgcccgaaggCCATGGCAC	1	caatgcttctcgtgatacccagatcatatgaaacagcatgactttttcaaga c gtgccatg-cc g CACGGTACCgg a a	CAATGCTTCTCGTGATACCCAGATCATATGAAACAGCATGACTTTTTCAAGA	0	52	52	GTGCCATG	52	60	8	CC	60	62	2	CGAA	62	66	4	GG	66	68	2	C	68	69	1	CATGGCAC	69	77	8		77	77	0
582	caatgcttctcgtgatacccagatcatatgaaacagcatgactttttcaagagtgccatgcccgaaggCAATGCTTCTCGTGATAC	1	caatgcttctcgtgatacccagatcatatgaaacagcatgactttttcaagagtgcca c tgcc g ACgg a CATAGTGCTCTTCGTA a	CAATGCTTCTCGTGATACCCAGATCATATGAAACAGCATGACTTTTTCAAGAGTGCCA	0	58	58	TG	58	60	2	CC	60	62	2	CGAA	62	66	4	GG	66	68	2		68	68	0	CA	68	70	2	ATGCTTCTCGTGATAC	70	86	16
583	caatgcttctcgtgatacccagatcatatgaaacagcatgactttttcaagagtgccatgcccgaaggTCATGCTGTTTCATATGATCTGGGTATCACGAGAAGC	1	caat tttttcaagagt gcttctcgtgatacccagatcatatgaaacagcatgac g CGAAGAGCACTATGGGTCTAGTATACTTTGTCGTACTggaagcccgtacc	CAAT	0	4	4	GCTTCTCGTGATACCCAGATCATATGAAACAGCATGA	4	41	37	C	41	42	1	TTTTTCAAGAGTGCCATGCCCGAAG	42	67	25	G	67	68	1		68	68	0	TCATGCTGTTTCATATGATCTGGGTATCACGAGAAGC	68	105	37		105	105	0
584	caatgcttctcgtgatacccagatcatatgaaacagcatgactttttcaagagtgccatgcccgaaggGAGATC	1	caatgct gtgatacccagatcatatgaaacagcat tctc g AGAGggaagcccgtaccgtgagaactttttca CT	CAATGCT	0	7	7	TCTC	7	11	4		11	11	0	GTGATACCCAGATCATATGAAACAGCATGACTTTTTCAAGAGTGCCATGCCCGAAGG	11	68	57		68	68	0		68	68	0	GAGA	68	72	4	TC	72	74	2
585	caatgcttctcgtgatacccagatcatatgaaacagcatgactttttcaagagtgccatgcccgaaggCACTCTTCAAAAAGTCATGC	1	caatgcttctcgtgatacccagatcatatgaaacagcatgactttttc atgc aagagtgcc c TTCTCACggaagc CGTACTGAAAAAC	CAATGCTTCTCGTGATACCCAGATCATATGAAACAGCATGACTTTTTC	0	48	48	AAGAGTG	48	55	7	CC	55	57	2	ATGCCCGAA	57	66	9	GG	66	68	2		68	68	0	CACTCTT	68	75	7	CAAAAAGTCATGC	75	88	13
586	caatgcttctcgtgatacccagatcatatgaaacagcatgactttttcaagagtgccatgcccgaaggGCATTGAGGTCA	1	ttctcgtgatacccagatcatatgaaacag caatgc c GTTACG a ACTGGA ggaagcccgtaccgtgagaactttttcagt		0	0	0	CAATGC	0	6	6		6	6	0	TTCTCGTGATACCCAGATCATATGAAACAGCATGACTTTTTCAAGAGTGCCATGCCCGAAGG	6	68	62		68	68	0		68	68	0	GCATTG	68	74	6	AGGTCA	74	80	6
587	caatgcttctcgtgatacccagatcatatgaaacagcatgactttttcaagagtgccatgcccgaaggGTATCACGAGAAGCATTAG	1	c agatcatatgaaacagcatgac aatgcttctcgtgataccc t TTACGAAGAGCACTATGgg t GA aagcccgtaccgtgagaacttt	C	0	1	1	AATGCTTCTCGTGATAC	1	18	17	CC	18	20	2	AGATCATATGAAACAGCATGACTTTTTCAAGAGTGCCATGCCCGAA	20	66	46	GG	66	68	2		68	68	0	GTATCACGAGAAGCATT	68	85	17	AG	85	87	2
588	caatgcttctcgtgatacccagatcatatgaaacagcatgactttttcaagagtgccatgcccgaaggGTATCACGAGAAGCATAT	1	ca agatcatatgaaacagcatgac atgcttctcgtgataccc t TACGAAGAGCACTATGgg t TA aagcccgtaccgtgagaacttt	CA	0	2	2	ATGCTTCTCGTGATAC	2	18	16	CC	18	20	2	AGATCATATGAAACAGCATGACTTTTTCAAGAGTGCCATGCCCGAA	20	66	46	GG	66	68	2		68	68	0	GTATCACGAGAAGCAT	68	84	16	AT	84	86	2
589	caatgcttctcgtgatacccagatcatatgaaacagcatgactttttcaagagtgccatgcccgaaggGTATGGCAC	1	caatgcttctcgtg agatcatatgaaacagcatgac ataccc t TATGgg t CACGG aagcccgtaccgtgagaacttt	CAATGCTTCTCGTG	0	14	14	ATAC	14	18	4	CC	18	20	2	AGATCATATGAAACAGCATGACTTTTTCAAGAGTGCCATGCCCGAA	20	66	46	GG	66	68	2		68	68	0	GTAT	68	72	4	GGCAC	72	77	5
590	caatgcttctcgtgatacccagatcatatgaaacagcatgactttttcaagagtgccatgcccgaaggTCATGCTGTTTCATATGATCTGGGTATC	1	caatgcttctcgt tttttcaagagt gatacccagatcatatgaaacagcatgac g CTATGGGTCTAGTATACTTTGTCGTACTggaagcccgtacc	CAATGCTTCTCGT	0	13	13	GATACCCAGATCATATGAAACAGCATGA	13	41	28	C	41	42	1	TTTTTCAAGAGTGCCATGCCCGAAG	42	67	25	G	67	68	1		68	68	0	TCATGCTGTTTCATATGATCTGGGTATC	68	96	28		96	96	0
591	caatgcttctcgtgatacccagatcatatgaaacagcatgactttttcaagagtgccatgcccgaaggGGCATTGAAC	1	caatgcttctcgtgatacccagatcatatgaaacagcatgactttttcaagagtgcc g atgccc a TACGGg a CAAGT g	CAATGCTTCTCGTGATACCCAGATCATATGAAACAGCATGACTTTTTCAAGAGTGCC	0	57	57	ATGCC	57	62	5	C	62	63	1	GAAG	63	67	4	G	67	68	1		68	68	0	GGCAT	68	73	5	TGAAC	73	78	5
592	caatgcttctcgtgatacccagatcatatgaaacagcatgactttttcaagagtgccatgcccgaaggTACTCTTGAAAAA	1	caatgcttctcgtgatacccagatcatatgaaacagcatgac gccatgc tttttcaagagt c AAAAAGTTCTCATggaagc	CAATGCTTCTCGTGATACCCAGATCATATGAAACAGCATGAC	0	42	42	TTTTTCAAGAGT	42	54	12		54	54	0	GCCATGCCCGAAGG	54	68	14		68	68	0	T	68	69	1	ACTCTTGAAAAA	69	81	12		81	81	0
593	caatgcttctcgtgatacccagatcatatgaaacagcatgactttttcaagagtgccatgcccgaaggCAATGCTTCTCGTGATACCCAGAT	1	caatgcttctcgtgatacccagatcatatgaaacagcatgactttttcaagagtgcca c tgcc g ACgg a TAGACCCATAGTGCTCTTCGTA a	CAATGCTTCTCGTGATACCCAGATCATATGAAACAGCATGACTTTTTCAAGAGTGCCA	0	58	58	TG	58	60	2	CC	60	62	2	CGAA	62	66	4	GG	66	68	2		68	68	0	CA	68	70	2	ATGCTTCTCGTGATACCCAGAT	70	92	22
594	caatgcttctcgtgatacccagatcatatgaaacagcatgactttttcaagagtgccatgcccgaaggTCATGGCACTCTTGAAAAAG	1	caatgcttctcgtgatacccagatcatatgaaacagcatga c ctttttcaagagtgccatg-cc g GAAAAAGTTCTCACGGTACTgg a a	CAATGCTTCTCGTGATACCCAGATCATATGAAACAGCATGA	0	41	41	CTTTTTCAAGAGTGCCATG	41	60	19	CC	60	62	2	CGAA	62	66	4	GG	66	68	2	T	68	69	1	CATGGCACTCTTGAAAAAG	69	88	19		88	88	0
595	caatgcttctcgtgatacccagatcatatgaaacagcatgactttttcaagagtgccatgcccgaaggCCTGGCACTCTTGAAAAGTCATGCT	1	caatgcttctcgtgatacccagatcatatgaaacagcatgact tgccc ttttcaagagtgcca g AAAAGTTCTCACGGT a TCGTACTG CCgga	CAATGCTTCTCGTGATACCCAGATCATATGAAACAGCATGACT	0	43	43	TTTTCAAGAGTGCCA	43	58	15		58	58	0	TGCCCGAAGG	58	68	10		68	68	0	CC	68	70	2	TGGCACTCTTGAAAA	70	85	15	GTCATGCT	85	93	8
596	caatgcttctcgtgatacccagatcatatgaaacagcatgactttttcaagagtgccatgcccgaaggTCATGCTGTTTCATATGAAC	1	caatgcttctcgtgatacccaga tttttcaagagt tcatatgaaacagcatgac g AGTATACTTTGTCGTACTggaagcccgtacc CA	CAATGCTTCTCGTGATACCCAGA	0	23	23	TCATATGAAACAGCATGA	23	41	18	C	41	42	1	TTTTTCAAGAGTGCCATGCCCGAAG	42	67	25	G	67	68	1		68	68	0	TCATGCTGTTTCATATGA	68	86	18	AC	86	88	2
597	caatgcttctcgtgatacccagatcatatgaaacagcatgactttttcaagagtgccatgcccgaaggGTATCACGAGAAGCATTGTC	1	agatcatatgaaacagcatgac caatgcttctcgtgataccc t GTTACGAAGAGCACTATGgg t CT aagcccgtaccgtgagaacttt		0	0	0	CAATGCTTCTCGTGATAC	0	18	18	CC	18	20	2	AGATCATATGAAACAGCATGACTTTTTCAAGAGTGCCATGCCCGAA	20	66	46	GG	66	68	2		68	68	0	GTATCACGAGAAGCATTG	68	86	18	TC	86	88	2
598	caatgcttctcgtgatacccagatcatatgaaacagcatgactttttcaagagtgccatgcccgaaggCCTCTTGAAAAAGTCATCGGGCATGGCACT	1	caatgcttctcgtgatacccagatcatatgaaacagc tgccatg atgactttttcaagag c TACTGAAAAAGTTCTC c TCACGGTACGGGC Cggaagc	CAATGCTTCTCGTGATACCCAGATCATATGAAACAGC	0	37	37	ATGACTTTTTCAAGAG	37	53	16		53	53	0	TGCCATGCCCGAAGG	53	68	15		68	68	0	C	68	69	1	CTCTTGAAAAAGTCAT	69	85	16	CGGGCATGGCACT	85	98	13
599	caatgcttctcgtgatacccagatcatatgaaacagcatgactttttcaagagtgccatgcccgaaggGCCG	1	caatgcttctcgtgatacccagatcatatgaaacagcatgactttttcaagagtgccat g gccc a CGgga GC	CAATGCTTCTCGTGATACCCAGATCATATGAAACAGCATGACTTTTTCAAGAGTGCCAT	0	59	59	GC	59	61	2	CC	61	63	2	GAA	63	66	3	GG	66	68	2		68	68	0	GC	68	70	2	CG	70	72	2
600	caatgcttctcgtgatacccagatcatatgaaacagcatgactttttcaagagtgccatgcccgaaggTCATGCTGTTTCATATGATCTGAAACAGCATGATCATATGAAACAGC	1	caatgcttctcgtgatacc tttttcaagagt cagatcatatgaaacagcatgac g GTCTAGTATACTTTGTCGTACTggaagcccgtacc CGACAAAGTATACTAGTACGACAAA	CAATGCTTCTCGTGATACC	0	19	19	CAGATCATATGAAACAGCATGA	19	41	22	C	41	42	1	TTTTTCAAGAGTGCCATGCCCGAAG	42	67	25	G	67	68	1		68	68	0	TCATGCTGTTTCATATGATCTG	68	90	22	AAACAGCATGATCATATGAAACAGC	90	115	25
601	caatgcttctcgtgatacccagatcatatgaaacagcatgactttttcaagagtgccatgcccgaaggCCATGCTGTTTCATACAGCATGGCCT	1	caatgcttctcgtgatacccagatca actttttcaagagt tatgaaacagcatg g ATACTTTGTCGTACCggaagcccgtacc TCCGGTACGAC	CAATGCTTCTCGTGATACCCAGATCA	0	26	26	TATGAAACAGCATG	26	40	14		40	40	0	ACTTTTTCAAGAGTGCCATGCCCGAAGG	40	68	28		68	68	0	C	68	69	1	CATGCTGTTTCATA	69	83	14	CAGCATGGCCT	83	94	11
602	caatgcttctcgtgatacccagatcatatgaaacagcatgactttttcaagagtgccatgcccgaaggGGCATGGCACTG	1	caatgcttctcgtgatacccagatcatatgaaacagcatgactttttcaag g agtgccatgccc a TCACGGTACGGg a G g	CAATGCTTCTCGTGATACCCAGATCATATGAAACAGCATGACTTTTTCAAG	0	51	51	AGTGCCATGCC	51	62	11	C	62	63	1	GAAG	63	67	4	G	67	68	1		68	68	0	GGCATGGCACT	68	79	11	G	79	80	1
603	caatgcttctcgtgatacccagatcatatgaaacagcatgactttttcaagagtgccatgcccgaaggCATAC	1	caatgcttctcgtgatacccagatcatatgaaacagcatgactttttcaagagtgcc c atgcc g TACgg a CA a	CAATGCTTCTCGTGATACCCAGATCATATGAAACAGCATGACTTTTTCAAGAGTGCC	0	57	57	ATG	57	60	3	CC	60	62	2	CGAA	62	66	4	GG	66	68	2		68	68	0	CAT	68	71	3	AC	71	73	2
604	caatgcttctcgtgatacccagatcatatgaaacagcatgactttttcaagagtgccatgcccgaaggATGACTCTTGAAAA	1	caatgcttctcgtgatacccagatcatatgaaacagcatgact gccatgcc ttttcaagagt c AAAAGTTCTCAGTAggaag	CAATGCTTCTCGTGATACCCAGATCATATGAAACAGCATGACT	0	43	43	TTTTCAAGAGT	43	54	11		54	54	0	GCCATGCCCGAAGG	54	68	14		68	68	0	ATG	68	71	3	ACTCTTGAAAA	71	82	11		82	82	0
605	caatgcttctcgtgatacccagatcatatgaaacagcatgactttttcaagagtgccatgcccgaaggGCATGTCACTCTTGAAAA	1	caatgcttctcgtgatacccagatcatatgaaacagcatgactttttcaagagtgc g catgccc a GTACGgga AAAAGTTCTCACT	CAATGCTTCTCGTGATACCCAGATCATATGAAACAGCATGACTTTTTCAAGAGTGC	0	56	56	CATGC	56	61	5	CC	61	63	2	GAA	63	66	3	GG	66	68	2		68	68	0	GCATG	68	73	5	TCACTCTTGAAAA	73	86	13
606	caatgcttctcgtgatacccagatcatatgaaacagcatgactttttcaagagtgccatgcccgaaggTCATGCTGTTTCATATGAGACGGCAC	1	caatgcttctcgtgatacccaga tttttcaagagt tcatatgaaacagcatgac g AGTATACTTTGTCGTACTggaagcccgtacc CACGGCAG	CAATGCTTCTCGTGATACCCAGA	0	23	23	TCATATGAAACAGCATGA	23	41	18	C	41	42	1	TTTTTCAAGAGTGCCATGCCCGAAG	42	67	25	G	67	68	1		68	68	0	TCATGCTGTTTCATATGA	68	86	18	GACGGCAC	86	94	8
607	caatgcttctcgtgatacccagatcatatgaaacagcatgactttttcaagagtgccatgcccgaaggTCATGCTGTTTCATATGAAACAGCC	1	caatgcttctcgtgatacccaga tttttcaagagt tcatatgaaacagcatgac g AGTATACTTTGTCGTACTggaagcccgtacc CCGACAA	CAATGCTTCTCGTGATACCCAGA	0	23	23	TCATATGAAACAGCATGA	23	41	18	C	41	42	1	TTTTTCAAGAGTGCCATGCCCGAAG	42	67	25	G	67	68	1		68	68	0	TCATGCTGTTTCATATGA	68	86	18	AACAGCC	86	93	7
608	caatgcttctcgtgatacccagatcatatgaaacagcatgactttttcaagagtgccatgcccgaaggGGCATGGCACTCTTGAAAAGTCAT	1	caatgcttctcgtgatacccagatcatatgaaacagcatgact g ttttcaagagtgccatgccc a AAAAGTTCTCACGGTACGGg a TACTG g	CAATGCTTCTCGTGATACCCAGATCATATGAAACAGCATGACT	0	43	43	TTTTCAAGAGTGCCATGCC	43	62	19	C	62	63	1	GAAG	63	67	4	G	67	68	1		68	68	0	GGCATGGCACTCTTGAAAA	68	87	19	GTCAT	87	92	5
609	caatgcttctcgtgatacccagatcatatgaaacagcatgactttttcaagagtgccatgcccgaaggTCATGCTGTTTCATCTTCGGGCATGGCAC	1	caatgcttctcgtgatacccagatcat tttttcaagagt atgaaacagcatgac g TACTTTGTCGTACTggaagcccgtacc CACGGTACGGGCTTC	CAATGCTTCTCGTGATACCCAGATCAT	0	27	27	ATGAAACAGCATGA	27	41	14	C	41	42	1	TTTTTCAAGAGTGCCATGCCCGAAG	42	67	25	G	67	68	1		68	68	0	TCATGCTGTTTCAT	68	82	14	CTTCGGGCATGGCAC	82	97	15
610	caatgcttctcgtgatacccagatcatatgaaacagcatgactttttcaagagtgccatgcccgaaggGTATCACGAGAAGCAAT	1	caa agatcatatgaaacagcatgac tgcttctcgtgataccc t ACGAAGAGCACTATGgg t TA aagcccgtaccgtgagaacttt	CAA	0	3	3	TGCTTCTCGTGATAC	3	18	15	CC	18	20	2	AGATCATATGAAACAGCATGACTTTTTCAAGAGTGCCATGCCCGAA	20	66	46	GG	66	68	2		68	68	0	GTATCACGAGAAGCA	68	83	15	AT	83	85	2
611	caatgcttctcgtgatacccagatcatatgaaacagcatgactttttcaagagtgccatgcccgaaggTCATGCTGTTTCATATATGACCTTCGGGTCATATATGAAA	1	caatgcttctcgtgatacccagatc tttttcaagagt atatgaaacagcatgac g TATACTTTGTCGTACTggaagcccgtacc AAAGTATATACTGGGCTTCCAGTA	CAATGCTTCTCGTGATACCCAGATC	0	25	25	ATATGAAACAGCATGA	25	41	16	C	41	42	1	TTTTTCAAGAGTGCCATGCCCGAAG	42	67	25	G	67	68	1		68	68	0	TCATGCTGTTTCATAT	68	84	16	ATGACCTTCGGGTCATATATGAAA	84	108	24
612	caatgcttctcgtgatacccagatcatatgaaacagcatgactttttcaagagtgccatgcccgaaggCAAGC	1	caat tcgtgatacccagatcatatgaaacagc gctt-c a CGAACg t gaagcccgtaccgtgagaactttttcag	CAAT	0	4	4	GCTT	4	8	4	C	8	9	1	TCGTGATACCCAGATCATATGAAACAGCATGACTTTTTCAAGAGTGCCATGCCCGAAG	9	67	58	G	67	68	1	C	68	69	1	AAGC	69	73	4		73	73	0
613	caatgcttctcgtgatacccagatcatatgaaacagcatgactttttcaagagtgccatgcccgaaggGTATCACGAGGAGCATTGC	1	caatgctt agatcatatgaaacagcatgac ctcgtgataccc t GAGCACTATGgg t CGTTACGAG aagcccgtaccgtgagaacttt	CAATGCTT	0	8	8	CTCGTGATAC	8	18	10	CC	18	20	2	AGATCATATGAAACAGCATGACTTTTTCAAGAGTGCCATGCCCGAA	20	66	46	GG	66	68	2		68	68	0	GTATCACGAG	68	78	10	GAGCATTGC	78	87	9
614	caatgcttctcgtgatacccagatcatatgaaacagcatgactttttcaagagtgccatgcccgaaggCATTGGATCTC	1	ttctcgtgatacccagatcatatgaaacag caatgc c GTTACggaagcccgtaccgtgagaactttttcagta CTCTAG		0	0	0	CAATG	0	5	5	C	5	6	1	TTCTCGTGATACCCAGATCATATGAAACAGCATGACTTTTTCAAGAGTGCCATGCCCGAAG	6	67	61	G	67	68	1		68	68	0	CATTG	68	73	5	GATCTC	73	79	6
615	caatgcttctcgtgatacccagatcatatgaaacagcatgactttttcaagagtgccatgcccgaaggGCATGGCACTCTTGAAACA	1	caatgcttctcgtgatacccagatcatatgaaacagcatgactt g tttcaagagtgccatgccc a AAAGTTCTCACGGTACGgga AC	CAATGCTTCTCGTGATACCCAGATCATATGAAACAGCATGACTT	0	44	44	TTTCAAGAGTGCCATGC	44	61	17	CC	61	63	2	GAA	63	66	3	GG	66	68	2		68	68	0	GCATGGCACTCTTGAAA	68	85	17	CA	85	87	2
616	caatgcttctcgtgatacccagatcatatgaaacagcatgactttttcaagagtgccatgcccgaaggTCATGCTGTTTCATATAGT	1	caatgcttctcgtgatacccagatc tttttcaagagt atatgaaacagcatgac g TATACTTTGTCGTACTggaagcccgtacc TGA	CAATGCTTCTCGTGATACCCAGATC	0	25	25	ATATGAAACAGCATGA	25	41	16	C	41	42	1	TTTTTCAAGAGTGCCATGCCCGAAG	42	67	25	G	67	68	1		68	68	0	TCATGCTGTTTCATAT	68	84	16	AGT	84	87	3
617	caatgcttctcgtgatacccagatcatatgaaacagcatgactttttcaagagtgccatgcccgaaggTA	1	caatgcttctcgtga cagatcatatgaaacagcatgac tacc t ATggaagcccgtaccgtgagaactttt	CAATGCTTCTCGTGA	0	15	15	TA	15	17	2	CC	17	19	2	CAGATCATATGAAACAGCATGACTTTTTCAAGAGTGCCATGCCCGAA	19	66	47	GG	66	68	2		68	68	0	TA	68	70	2		70	70	0
618	caatgcttctcgtgatacccagatcatatgaaacagcatgactttttcaagagtgccatgcccgaaggGCCCGAAGGA	1	caatgcttctcgtgatacccagatcatatgaaacagcatgactttttcaagagtgccat g gccc a CGgga AGGAAGCC	CAATGCTTCTCGTGATACCCAGATCATATGAAACAGCATGACTTTTTCAAGAGTGCCAT	0	59	59	GC	59	61	2	CC	61	63	2	GAA	63	66	3	GG	66	68	2		68	68	0	GC	68	70	2	CCGAAGGA	70	78	8
619	caatgcttctcgtgatacccagatcatatgaaacagcatgactttttcaagagtgccatgcccgaaggTCATGCTGTTTCATACAGCATGACCTTCGGGCAT	1	caatgcttctcgtgatacccagatca tttttcaagagt tatgaaacagcatgac g ATACTTTGTCGTACTggaagcccgtacc TACGGGCTTCCAGTACGAC	CAATGCTTCTCGTGATACCCAGATCA	0	26	26	TATGAAACAGCATGA	26	41	15	C	41	42	1	TTTTTCAAGAGTGCCATGCCCGAAG	42	67	25	G	67	68	1		68	68	0	TCATGCTGTTTCATA	68	83	15	CAGCATGACCTTCGGGCAT	83	102	19
620	caatgcttctcgtgatacccagatcatatgaaacagcatgactttttcaagagtgccatgcccgaaggCATTGAAGCTCTCTTGAAAAAGAGAGCTTCAATGC	1	ttctcgtgatacccagatcatatgaaacag caatgc c GTTACggaagcccgtaccgtgagaactttttcagta CGTAACTTCGAGAGAAAAAGTTCTCTCGAA		0	0	0	CAATG	0	5	5	C	5	6	1	TTCTCGTGATACCCAGATCATATGAAACAGCATGACTTTTTCAAGAGTGCCATGCCCGAAG	6	67	61	G	67	68	1		68	68	0	CATTG	68	73	5	AAGCTCTCTTGAAAAAGAGAGCTTCAATGC	73	103	30
621	caatgcttctcgtgatacccagatcatatgaaacagcatgactttttcaagagtgccatgcccgaaggGTATCACGAGAAGCGTTGA	1	caat agatcatatgaaacagcatgac gcttctcgtgataccc t CGAAGAGCACTATGgg t AGTTG aagcccgtaccgtgagaacttt	CAAT	0	4	4	GCTTCTCGTGATAC	4	18	14	CC	18	20	2	AGATCATATGAAACAGCATGACTTTTTCAAGAGTGCCATGCCCGAA	20	66	46	GG	66	68	2		68	68	0	GTATCACGAGAAGC	68	82	14	GTTGA	82	87	5
622	caatgcttctcgtgatacccagatcatatgaaacagcatgactttttcaagagtgccatgcccgaaggTT	1	caatgcttctcgtgatacccagatcatatga agcatgactttttcaa aac g TTggaagcccgtaccgtga	CAATGCTTCTCGTGATACCCAGATCATATGA	0	31	31	AA	31	33	2	C	33	34	1	AGCATGACTTTTTCAAGAGTGCCATGCCCGAAG	34	67	33	G	67	68	1		68	68	0	TT	68	70	2		70	70	0
623	caatgcttctcgtgatacccagatcatatgaaacagcatgactttttcaagagtgccatgcccgaaggGGCATGGCACTCTTGAAAAAGTCC	1	caatgcttctcgtgatacccagatcatatgaaacagcat g gactttttcaagagtgccatgccc a CTGAAAAAGTTCTCACGGTACGGg a C g	CAATGCTTCTCGTGATACCCAGATCATATGAAACAGCAT	0	39	39	GACTTTTTCAAGAGTGCCATGCC	39	62	23	C	62	63	1	GAAG	63	67	4	G	67	68	1		68	68	0	GGCATGGCACTCTTGAAAAAGTC	68	91	23	C	91	92	1
624	caatgcttctcgtgatacccagatcatatgaaacagcatgactttttcaagagtgccatgcccgaaggGTCATGGCACTCTTGAAAC	1	caatgcttctcgtgatacccagatcatatgaaacagcatgactt c tttcaagagtgccatg--cc g AAAGTTCTCACGGTACTGgg a C a	CAATGCTTCTCGTGATACCCAGATCATATGAAACAGCATGACTT	0	44	44	TTTCAAGAGTGCCATG	44	60	16	CC	60	62	2	CGAA	62	66	4	GG	66	68	2	GT	68	70	2	CATGGCACTCTTGAAA	70	86	16	C	86	87	1
625	caatgcttctcgtgatacccagatcatatgaaacagcatgactttttcaagagtgccatgcccgaaggCAATCAATGCTTCTCCCTCAATGC	1	caatgcttctcgtgatacccagatcatatgaaacagcatgactttttcaagagtgcca c tgcc g ACgg a CGTAACTCCCTCTTCGTAACTA a	CAATGCTTCTCGTGATACCCAGATCATATGAAACAGCATGACTTTTTCAAGAGTGCCA	0	58	58	TG	58	60	2	CC	60	62	2	CGAA	62	66	4	GG	66	68	2		68	68	0	CA	68	70	2	ATCAATGCTTCTCCCTCAATGC	70	92	22
626	caatgcttctcgtgatacccagatcatatgaaacagcatgactttttcaagagtgccatgcccgaaggCCATGCTGTTTCATATGAA	1	caatgcttctcgtgatacccaga actttttcaagagt tcatatgaaacagcatg g AGTATACTTTGTCGTACCggaagcccgtacc A	CAATGCTTCTCGTGATACCCAGA	0	23	23	TCATATGAAACAGCATG	23	40	17		40	40	0	ACTTTTTCAAGAGTGCCATGCCCGAAGG	40	68	28		68	68	0	C	68	69	1	CATGCTGTTTCATATGA	69	86	17	A	86	87	1
627	caatgcttctcgtgatacccagatcatatgaaacagcatgactttttcaagagtgccatgcccgaaggCACTCTTGAAAAAGA	1	caatgcttctcgtgatacccagatcatatgaaacagcatga atgc ctttttcaagagtgcc c GAAAAAGTTCTCACggaagc A	CAATGCTTCTCGTGATACCCAGATCATATGAAACAGCATGA	0	41	41	CTTTTTCAAGAGTG	41	55	14	CC	55	57	2	ATGCCCGAA	57	66	9	GG	66	68	2		68	68	0	CACTCTTGAAAAAG	68	82	14	A	82	83	1
628	caatgcttctcgtgatacccagatcatatgaaacagcatgactttttcaagagtgccatgcccgaaggGCATGGCACTCTTGAAGA	1	caatgcttctcgtgatacccagatcatatgaaacagcatgacttt g ttcaagagtgccatgccc a AAGTTCTCACGGTACGgga AG	CAATGCTTCTCGTGATACCCAGATCATATGAAACAGCATGACTTT	0	45	45	TTCAAGAGTGCCATGC	45	61	16	CC	61	63	2	GAA	63	66	3	GG	66	68	2		68	68	0	GCATGGCACTCTTGAA	68	84	16	GA	84	86	2
629	caatgcttctcgtgatacccagatcatatgaaacagcatgactttttcaagagtgccatgcccgaaggCCTGGCACTCTTGAAAAAGTCATGCT	1	caatgcttctcgtgatacccagatcatatgaaac tgccc agcatgactttttcaagagtgcca g TCGTACTGAAAAAGTTCTCACGGT a CCgga	CAATGCTTCTCGTGATACCCAGATCATATGAAAC	0	34	34	AGCATGACTTTTTCAAGAGTGCCA	34	58	24		58	58	0	TGCCCGAAGG	58	68	10		68	68	0	CC	68	70	2	TGGCACTCTTGAAAAAGTCATGCT	70	94	24		94	94	0
630	caatgcttctcgtgatacccagatcatatgaaacagcatgactttttcaagagtgccatgcccgaaggGTCATGCTGTTTCATA	1	caatgcttctcgtgatacccagatca tttttcaagagt tatgaaacagcatgac g ATACTTTGTCGTACTG c ggaagcccgtac	CAATGCTTCTCGTGATACCCAGATCA	0	26	26	TATGAAACAGCATGAC	26	42	16		42	42	0	TTTTTCAAGAGTGCCATGCCCGAAGG	42	68	26		68	68	0		68	68	0	GTCATGCTGTTTCATA	68	84	16		84	84	0
631	caatgcttctcgtgatacccagatcatatgaaacagcatgactttttcaagagtgccatgcccgaaggGCATGGCAGTCTTGAAAAGTCATGCTGTTTCATAA	1	caatgcttctcgtgatacccagatcatatgaaacagcatgactttttcaagag g tgccatgccc a ACGGTACGgga AATACTTTGTCGTACTGAAAAGTTCTG	CAATGCTTCTCGTGATACCCAGATCATATGAAACAGCATGACTTTTTCAAGAG	0	53	53	TGCCATGC	53	61	8	CC	61	63	2	GAA	63	66	3	GG	66	68	2		68	68	0	GCATGGCA	68	76	8	GTCTTGAAAAGTCATGCTGTTTCATAA	76	103	27
632	caatgcttctcgtgatacccagatcatatgaaacagcatgactttttcaagagtgccatgcccgaaggGGCATGGCACCA	1	caatgcttctcgtgatacccagatcatatgaaacagcatgactttttcaaga g gtgccatgccc a CACGGTACGGg a AC g	CAATGCTTCTCGTGATACCCAGATCATATGAAACAGCATGACTTTTTCAAGA	0	52	52	GTGCCATGCC	52	62	10	C	62	63	1	GAAG	63	67	4	G	67	68	1		68	68	0	GGCATGGCAC	68	78	10	CA	78	80	2
633	caatgcttctcgtgatacccagatcatatgaaacagcatgactttttcaagagtgccatgcccgaaggGTATCACGAGAAT	1	caatgc agatcatatgaaacagcatgac ttctcgtgataccc t AAGAGCACTATGgg t T aagcccgtaccgtgagaacttt	CAATGC	0	6	6	TTCTCGTGATAC	6	18	12	CC	18	20	2	AGATCATATGAAACAGCATGACTTTTTCAAGAGTGCCATGCCCGAA	20	66	46	GG	66	68	2		68	68	0	GTATCACGAGAA	68	80	12	T	80	81	1
634	caatgcttctcgtgatacccagatcatatgaaacagcatgactttttcaagagtgccatgcccgaaggCCATGCTGTTTCATATGATCTGGGAA	1	caatgcttctcgtgata actttttcaagagt cccagatcatatgaaacagcatg g GGGTCTAGTATACTTTGTCGTACCggaagcccgtacc AA	CAATGCTTCTCGTGATA	0	17	17	CCCAGATCATATGAAACAGCATG	17	40	23		40	40	0	ACTTTTTCAAGAGTGCCATGCCCGAAGG	40	68	28		68	68	0	C	68	69	1	CATGCTGTTTCATATGATCTGGG	69	92	23	AA	92	94	2
635	caatgcttctcgtgatacccagatcatatgaaacagcatgactttttcaagagtgccatgcccgaaggCCTTCGACCTTCGGGCATGGCCCGAAGGTCGAG	1	caatgcttctcgtgatacccagatcatatgaaacagcatgactttttcaagagt CCT gccatgcccgaagg T CGGTACGGGCTTCCAGC GAGCTGGAAGCC	CAATGCTTCTCGTGATACCCAGATCATATGAAACAGCATGACTTTTTCAAGAGT	0	54	54	GCCATGCCCGAAGG	54	68	14		68	68	0		68	68	0		68	68	0	CCTTCGA	68	75	7	CCTTCGGGCATGGC	75	89	14	CCGAAGGTCGAG	89	101	12
636	caatgcttctcgtgatacccagatcatatgaaacagcatgactttttcaagagtgccatgcccgaaggCACTCTTGAAA	1	caatgcttctcgtgatacccagatcatatgaaacagcatgactt atgc tttcaagagtgcc c AAAGTTCTCACggaagc	CAATGCTTCTCGTGATACCCAGATCATATGAAACAGCATGACTT	0	44	44	TTTCAAGAGTG	44	55	11	CC	55	57	2	ATGCCCGAA	57	66	9	GG	66	68	2		68	68	0	CACTCTTGAAA	68	79	11		79	79	0
637	caatgcttctcgtgatacccagatcatatgaaacagcatgactttttcaagagtgccatgcccgaaggCATGGCACTCTTGAAAAAGTCG	1	caatgcttctcgtgatacccagatcatatgaaacagcat c gactttttcaagagtgccatgcc g CTGAAAAAGTTCTCACGGTACgg a G a	CAATGCTTCTCGTGATACCCAGATCATATGAAACAGCAT	0	39	39	GACTTTTTCAAGAGTGCCATG	39	60	21	CC	60	62	2	CGAA	62	66	4	GG	66	68	2		68	68	0	CATGGCACTCTTGAAAAAGTC	68	89	21	G	89	90	1
638	caatgcttctcgtgatacccagatcatatgaaacagcatgactttttcaagagtgccatgcccgaaggCACTCGTGAAAAAGTCATGC	1	caatgcttctcgtgatacccagatcatatgaaacagcatgactttttcaa atgc gagtgcc c CTCACggaagc CGTACTGAAAAAGTG	CAATGCTTCTCGTGATACCCAGATCATATGAAACAGCATGACTTTTTCAA	0	50	50	GAGTG	50	55	5	CC	55	57	2	ATGCCCGAA	57	66	9	GG	66	68	2		68	68	0	CACTC	68	73	5	GTGAAAAAGTCATGC	73	88	15
639	caatgcttctcgtgatacccagatcatatgaaacagcatgactttttcaagagtgccatgcccgaaggGCCTGGCACTCTTGAAAAAGTCAT	1	caatgcttctcgtgatacccagatcatatgaaacagc tgcccg atgactttttcaagagtgcca a TACTGAAAAAGTTCTCACGGTCCGgga	CAATGCTTCTCGTGATACCCAGATCATATGAAACAGC	0	37	37	ATGACTTTTTCAAGAGTGCCA	37	58	21		58	58	0	TGCCCGAAGG	58	68	10		68	68	0	GCC	68	71	3	TGGCACTCTTGAAAAAGTCAT	71	92	21		92	92	0
640	caatgcttctcgtgatacccagatcatatgaaacagcatgactttttcaagagtgccatgcccgaaggCATGGCACTCTTGAAAAAGTCATGCT	1	caatgcttctcgtgatacccagatcatatgaaac c agcatgactttttcaagagtgccatgcc g TCGTACTGAAAAAGTTCTCACGGTACgg a a	CAATGCTTCTCGTGATACCCAGATCATATGAAAC	0	34	34	AGCATGACTTTTTCAAGAGTGCCATG	34	60	26	CC	60	62	2	CGAA	62	66	4	GG	66	68	2		68	68	0	CATGGCACTCTTGAAAAAGTCATGCT	68	94	26		94	94	0
641	caatgcttctcgtgatacccagatcatatgaaacagcatgactttttcaagagtgccatgcccgaaggGTCATGCTGTTTCATGACCCTTCGGGCATG	1	caatgcttctcgtgatacccagatcat tttttcaagagt atgaaacagcatgac g TACTTTGTCGTACTG c GTACGGGCTTCCCAG ggaagcccgtac	CAATGCTTCTCGTGATACCCAGATCAT	0	27	27	ATGAAACAGCATGAC	27	42	15		42	42	0	TTTTTCAAGAGTGCCATGCCCGAAGG	42	68	26		68	68	0		68	68	0	GTCATGCTGTTTCAT	68	83	15	GACCCTTCGGGCATG	83	98	15
642	caatgcttctcgtgatacccagatcatatgaaacagcatgactttttcaagagtgccatgcccgaaggTATCACGAGAAGCATTGT	1	cagatcatatgaaacagcatgac caatgcttctcgtgatacc t GTTACGAAGAGCACTATggaagcccgtaccgtgagaactttt T		0	0	0	CAATGCTTCTCGTGATA	0	17	17	CC	17	19	2	CAGATCATATGAAACAGCATGACTTTTTCAAGAGTGCCATGCCCGAA	19	66	47	GG	66	68	2		68	68	0	TATCACGAGAAGCATTG	68	85	17	T	85	86	1
643	caatgcttctcgtgatacccagatcatatgaaacagcatgactttttcaagagtgccatgcccgaaggCCTCTTGAAAAAGTCATGCTGTTTCATATGATCT	1	caatgcttctcgtgataccc tgccatg agatcatatgaaacagcatgactttttcaagag c TCTAGTATACTTTGTCGTACTGAAAAAGTTCTC c Cggaagc	CAATGCTTCTCGTGATACCC	0	20	20	AGATCATATGAAACAGCATGACTTTTTCAAGAG	20	53	33		53	53	0	TGCCATGCCCGAAGG	53	68	15		68	68	0	C	68	69	1	CTCTTGAAAAAGTCATGCTGTTTCATATGATCT	69	102	33		102	102	0
644	caatgcttctcgtgatacccagatcatatgaaacagcatgactttttcaagagtgccatgcccgaaggGTCATGCTGTCC	1	caatgcttctcgtgatacccagatcatatgaa tttttcaagagt acagcatgac g TGTCGTACTG c CC ggaagcccgtac	CAATGCTTCTCGTGATACCCAGATCATATGAA	0	32	32	ACAGCATGAC	32	42	10		42	42	0	TTTTTCAAGAGTGCCATGCCCGAAGG	42	68	26		68	68	0		68	68	0	GTCATGCTGT	68	78	10	CC	78	80	2
645	caatgcttctcgtgatacccagatcatatgaaacagcatgactttttcaagagtgccatgcccgaaggGCATGGCACTCTTGAAAAGTCAT	1	caatgcttctcgtgatacccagatcatatgaaacagcatgact g ttttcaagagtgccatgccc a AAAAGTTCTCACGGTACGgga TACTG	CAATGCTTCTCGTGATACCCAGATCATATGAAACAGCATGACT	0	43	43	TTTTCAAGAGTGCCATGC	43	61	18	CC	61	63	2	GAA	63	66	3	GG	66	68	2		68	68	0	GCATGGCACTCTTGAAAA	68	86	18	GTCAT	86	91	5
646	caatgcttctcgtgatacccagatcatatgaaacagcatgactttttcaagagtgccatgcccgaaggAAGCATTGAC	1	tcgtgatacccagatcatatgaaacagc caatgcttc a GTTACGAAg t CA gaagcccgtaccgtgagaactttttcag		0	0	0	CAATGCTT	0	8	8	C	8	9	1	TCGTGATACCCAGATCATATGAAACAGCATGACTTTTTCAAGAGTGCCATGCCCGAAG	9	67	58	G	67	68	1		68	68	0	AAGCATTG	68	76	8	AC	76	78	2
647	caatgcttctcgtgatacccagatcatatgaaacagcatgactttttcaagagtgccatgcccgaaggGCATCGCACTCTTGAAAAAG	1	caatgcttctcgtgatacccagatcatatgaaacagcatga atgc ctttttcaagagtgc-----c c GAAAAAGTTCTCACGCTACGg c gaag	CAATGCTTCTCGTGATACCCAGATCATATGAAACAGCATGA	0	41	41	CTTTTTCAAGAGTGC	41	56	15	C	56	57	1	ATGCCCGAAG	57	67	10	G	67	68	1	GCATC	68	73	5	GCACTCTTGAAAAAG	73	88	15		88	88	0
648	caatgcttctcgtgatacccagatcatatgaaacagcatgactttttcaagagtgccatgcccgaaggGCAGCATGACTTTTCT	1	caatgcttctcgtgatacccagatcatatgaaacagcatgactttttcaagagtgcca g tgccc a ACGgga TCTTTTCAGTACG	CAATGCTTCTCGTGATACCCAGATCATATGAAACAGCATGACTTTTTCAAGAGTGCCA	0	58	58	TGC	58	61	3	CC	61	63	2	GAA	63	66	3	GG	66	68	2		68	68	0	GCA	68	71	3	GCATGACTTTTCT	71	84	13
649	caatgcttctcgtgatacccagatcatatgaaacagcatgactttttcaagagtgccatgcccgaaggATGCTGTTTCGCA	1	caatgcttctcgtgatacccagatcatat gactttttcaagag gaaacagcat t CTTTGTCGTAggaagcccgtaccg ACG	CAATGCTTCTCGTGATACCCAGATCATAT	0	29	29	GAAACAGCAT	29	39	10		39	39	0	GACTTTTTCAAGAGTGCCATGCCCGAAGG	39	68	29		68	68	0		68	68	0	ATGCTGTTTC	68	78	10	GCA	78	81	3
650	caatgcttctcgtgatacccagatcatatgaaacagcatgactttttcaagagtgccatgcccgaaggCATTGATCTGGGTATCACTGCCTTCGGGCAT	1	caatgcttctc tatgaaacagcatgactttttc gtgatacccagatca a CACTATGGGTCTAGTTACggaagcccgtaccgtgaga TACGGGCTTCCGT	CAATGCTTCTC	0	11	11	GTGATACCCAGATCA	11	26	15		26	26	0	TATGAAACAGCATGACTTTTTCAAGAGTGCCATGCCCGAAGG	26	68	42		68	68	0	CAT	68	71	3	TGATCTGGGTATCAC	71	86	15	TGCCTTCGGGCAT	86	99	13
651	caatgcttctcgtgatacccagatcatatgaaacagcatgactttttcaagagtgccatgcccgaaggCATTGAA	1	ttctcgtgatacccagatcatatgaaacag caatgc c GTTACggaagcccgtaccgtgagaactttttcagta AA		0	0	0	CAATG	0	5	5	C	5	6	1	TTCTCGTGATACCCAGATCATATGAAACAGCATGACTTTTTCAAGAGTGCCATGCCCGAAG	6	67	61	G	67	68	1		68	68	0	CATTG	68	73	5	AA	73	75	2
652	caatgcttctcgtgatacccagatcatatgaaacagcatgactttttcaagagtgccatgcccgaaggAAAAAGTCATGCTGTTT	1	caatgcttctcgtgatacccagatcatatg aagagtgcc aaacagcatgactttttc a TTTGTCGTACTGAAAAAggaagcccgt	CAATGCTTCTCGTGATACCCAGATCATATG	0	30	30	AAACAGCATGACTTTTT	30	47	17	C	47	48	1	AAGAGTGCCATGCCCGAAG	48	67	19	G	67	68	1		68	68	0	AAAAAGTCATGCTGTTT	68	85	17		85	85	0
653	caatgcttctcgtgatacccagatcatatgaaacagcatgactttttcaagagtgccatgcccgaaggGCATGGCACGA	1	caatgcttctcgtgatacccagatcatatgaaacagcatgactttttcaaga g gtgccatgccc a CACGGTACGgga AG	CAATGCTTCTCGTGATACCCAGATCATATGAAACAGCATGACTTTTTCAAGA	0	52	52	GTGCCATGC	52	61	9	CC	61	63	2	GAA	63	66	3	GG	66	68	2		68	68	0	GCATGGCAC	68	77	9	GA	77	79	2
654	caatgcttctcgtgatacccagatcatatgaaacagcatgactttttcaagagtgccatgcccgaaggGAAAACAGCT	1	caatgcttctcgtgatacccagatcatatgaaacagcatgact aagagtgcc ttttc a AAAAG t TCGAC ggaagcccg	CAATGCTTCTCGTGATACCCAGATCATATGAAACAGCATGACT	0	43	43	TTTTC	43	48	5		48	48	0	AAGAGTGCCATGCCCGAAGG	48	68	20		68	68	0		68	68	0	GAAAA	68	73	5	CAGCT	73	78	5
655	caatgcttctcgtgatacccagatcatatgaaacagcatgactttttcaagagtgccatgcccgaaggCACTCTTGAAAAAGCCAT	1	caatgcttctcgtgatacccagatcatatgaaacagcatga atgc ctttttcaagagtgcc c GAAAAAGTTCTCACggaagc TACC	CAATGCTTCTCGTGATACCCAGATCATATGAAACAGCATGA	0	41	41	CTTTTTCAAGAGTG	41	55	14	CC	55	57	2	ATGCCCGAA	57	66	9	GG	66	68	2		68	68	0	CACTCTTGAAAAAG	68	82	14	CCAT	82	86	4
656	caatgcttctcgtgatacccagatcatatgaaacagcatgactttttcaagagtgccatgcccgaaggTCATGCTGTTTCATGACCTTCGGGC	1	caatgcttctcgtgatacccagatcat tttttcaagagt atgaaacagcatgac g TACTTTGTCGTACTggaagcccgtacc CGGGCTTCCAG	CAATGCTTCTCGTGATACCCAGATCAT	0	27	27	ATGAAACAGCATGA	27	41	14	C	41	42	1	TTTTTCAAGAGTGCCATGCCCGAAG	42	67	25	G	67	68	1		68	68	0	TCATGCTGTTTCAT	68	82	14	GACCTTCGGGC	82	93	11
657	caatgcttctcgtgatacccagatcatatgaaacagcatgactttttcaagagtgccatgcccgaaggCCTTCGGGCATGC	1	caatgcttctcgtgatacccagatcatatgaaacagcatgactttttcaagagtgc catgcccgaagg GTACGGGCTTCC C	CAATGCTTCTCGTGATACCCAGATCATATGAAACAGCATGACTTTTTCAAGAGTGC	0	56	56	CATGCCCGAAGG	56	68	12		68	68	0		68	68	0		68	68	0		68	68	0	CCTTCGGGCATG	68	80	12	C	80	81	1
658	caatgcttctcgtgatacccagatcatatgaaacagcatgactttttcaagagtgccatgcccgaaggGTCATGCTGTTTCATATGA	1	caatgcttctcgtgatacccaga tttttcaagagt tcatatgaaacagcatgac g AGTATACTTTGTCGTACTG c ggaagcccgtac	CAATGCTTCTCGTGATACCCAGA	0	23	23	TCATATGAAACAGCATGAC	23	42	19		42	42	0	TTTTTCAAGAGTGCCATGCCCGAAGG	42	68	26		68	68	0		68	68	0	GTCATGCTGTTTCATATGA	68	87	19		87	87	0
659	caatgcttctcgtgatacccagatcatatgaaacagcatgactttttcaagagtgccatgcccgaaggTCATGCTGTTGG	1	caatgcttctcgtgatacccagatcatatga tttttcaagagt aacagcatgac g TTGTCGTACTggaagcccgtacc GG	CAATGCTTCTCGTGATACCCAGATCATATGA	0	31	31	AACAGCATGA	31	41	10	C	41	42	1	TTTTTCAAGAGTGCCATGCCCGAAG	42	67	25	G	67	68	1		68	68	0	TCATGCTGTT	68	78	10	GG	78	80	2
660	caatgcttctcgtgatacccagatcatatgaaacagcatgactttttcaagagtgccatgcccgaaggCATTGGCACTCTTGAAAAAGTC	1	caatgcttctcgtgatacccagatcatatgaaacagcat tgcccg gactttttcaagagtgcca a CTGAAAAAGTTCTCACGGTTACgga	CAATGCTTCTCGTGATACCCAGATCATATGAAACAGCAT	0	39	39	GACTTTTTCAAGAGTGCCA	39	58	19		58	58	0	TGCCCGAAGG	58	68	10		68	68	0	CAT	68	71	3	TGGCACTCTTGAAAAAGTC	71	90	19		90	90	0
661	caatgcttctcgtgatacccagatcatatgaaacagcatgactttttcaagagtgccatgcccgaaggGCATGGCACTCTTGGAAAAAGTCATGCTGTTTCATAT	1	caatgcttctcgtgatacccagatcatatgaaacagcatgacttttt g caagagtgccatgccc a GTTCTCACGGTACGgga TATACTTTGTCGTACTGAAAAAG	CAATGCTTCTCGTGATACCCAGATCATATGAAACAGCATGACTTTTT	0	47	47	CAAGAGTGCCATGC	47	61	14	CC	61	63	2	GAA	63	66	3	GG	66	68	2		68	68	0	GCATGGCACTCTTG	68	82	14	GAAAAAGTCATGCTGTTTCATAT	82	105	23
662	caatgcttctcgtgatacccagatcatatgaaacagcatgactttttcaagagtgccatgcccgaaggGCATGA	1	caatgcttctcgtgatacccagatcatatgaaacagcatgactttttcaagagtgc g catgccc a GTACGgga A	CAATGCTTCTCGTGATACCCAGATCATATGAAACAGCATGACTTTTTCAAGAGTGC	0	56	56	CATGC	56	61	5	CC	61	63	2	GAA	63	66	3	GG	66	68	2		68	68	0	GCATG	68	73	5	A	73	74	1
663	caatgcttctcgtgatacccagatcatatgaaacagcatgactttttcaagagtgccatgcccgaaggTCATGCTG	1	caatgcttctcgtgatacccagatcatatgaaa tttttcaagagt cagcatgac g GTCGTACTggaagcccgtacc	CAATGCTTCTCGTGATACCCAGATCATATGAAA	0	33	33	CAGCATGA	33	41	8	C	41	42	1	TTTTTCAAGAGTGCCATGCCCGAAG	42	67	25	G	67	68	1		68	68	0	TCATGCTG	68	76	8		76	76	0
664	caatgcttctcgtgatacccagatcatatgaaacagcatgactttttcaagagtgccatgcccgaaggTCATGCTGTTTCTT	1	caatgcttctcgtgatacccagatcatat tttttcaagagt gaaacagcatgac g CTTTGTCGTACTggaagcccgtacc TT	CAATGCTTCTCGTGATACCCAGATCATAT	0	29	29	GAAACAGCATGA	29	41	12	C	41	42	1	TTTTTCAAGAGTGCCATGCCCGAAG	42	67	25	G	67	68	1		68	68	0	TCATGCTGTTTC	68	80	12	TT	80	82	2
665	caatgcttctcgtgatacccagatcatatgaaacagcatgactttttcaagagtgccatgcccgaaggTCATGCTTGAAAAAGT	1	caatgcttctcgtgatacccagatcatatgaaac tttttcaagagt agcatgac g TCGTACTggaagcccgtacc TGAAAAAGT	CAATGCTTCTCGTGATACCCAGATCATATGAAAC	0	34	34	AGCATGA	34	41	7	C	41	42	1	TTTTTCAAGAGTGCCATGCCCGAAG	42	67	25	G	67	68	1		68	68	0	TCATGCT	68	75	7	TGAAAAAGT	75	84	9
666	caatgcttctcgtgatacccagatcatatgaaacagcatgactttttcaagagtgccatgcccgaaggGCATGGCACTCTTGAG	1	caatgcttctcgtgatacccagatcatatgaaacagcatgactttt g tcaagagtgccatgccc a AGTTCTCACGGTACGgga G	CAATGCTTCTCGTGATACCCAGATCATATGAAACAGCATGACTTTT	0	46	46	TCAAGAGTGCCATGC	46	61	15	CC	61	63	2	GAA	63	66	3	GG	66	68	2		68	68	0	GCATGGCACTCTTGA	68	83	15	G	83	84	1
667	caatgcttctcgtgatacccagatcatatgaaacagcatgactttttcaagagtgccatgcccgaaggGCAATGGGCATGGCCCATTGCCCTTCGGGCG	1	caatgcttctcgtgatacccagatcatatgaaacagcatgactttttcaagagtgccat GCAATGGGCA gcccgaagg T CGGGCTTCCCGTTACCCGG G	CAATGCTTCTCGTGATACCCAGATCATATGAAACAGCATGACTTTTTCAAGAGTGCCAT	0	59	59	GCCCGAAGG	59	68	9		68	68	0		68	68	0		68	68	0	GCAATGGGCATGGCCCATTGC	68	89	21	CCTTCGGGC	89	98	9	G	98	99	1
668	caatgcttctcgtgatacccagatcatatgaaacagcatgactttttcaagagtgccatgcccgaaggCCCTCTTGAAAAAGTCATGCTGT	1	caatgcttctcgtgatacccagatcatatgaa tgccatgc acagcatgactttttcaagag c TGTCGTACTGAAAAAGTTCTCCCggaagc	CAATGCTTCTCGTGATACCCAGATCATATGAA	0	32	32	ACAGCATGACTTTTTCAAGAG	32	53	21		53	53	0	TGCCATGCCCGAAGG	53	68	15		68	68	0	CC	68	70	2	CTCTTGAAAAAGTCATGCTGT	70	91	21		91	91	0
669	caatgcttctcgtgatacccagatcatatgaaacagcatgactttttcaagagtgccatgcccgaaggAGAAGCATTGGC	1	gtgatacccagatcatatgaaacagca caatgcttctc t GTTACGAAGAg g CG gaagcccgtaccgtgagaactttttca		0	0	0	CAATGCTTCT	0	10	10	C	10	11	1	GTGATACCCAGATCATATGAAACAGCATGACTTTTTCAAGAGTGCCATGCCCGAAG	11	67	56	G	67	68	1		68	68	0	AGAAGCATTG	68	78	10	GC	78	80	2
670	caatgcttctcgtgatacccagatcatatgaaacagcatgactttttcaagagtgccatgcccgaaggCAATGCTTTTCATATGATCT	1	caatgcttctcgtgatacccagatcatatgaaacagcatgactttttcaagagtgcca c tgcc g ACgg a TCTAGTATACTTTTCGTA a	CAATGCTTCTCGTGATACCCAGATCATATGAAACAGCATGACTTTTTCAAGAGTGCCA	0	58	58	TG	58	60	2	CC	60	62	2	CGAA	62	66	4	GG	66	68	2		68	68	0	CA	68	70	2	ATGCTTTTCATATGATCT	70	88	18
671	caatgcttctcgtgatacccagatcatatgaaacagcatgactttttcaagagtgccatgcccgaaggCATGGCACTCTAGAAAA	1	caatgcttctcgtgatacccagatcatatgaaacagcatgactttttca c agagtgccatgcc g TCTCACGGTACgg a AAAAGA a	CAATGCTTCTCGTGATACCCAGATCATATGAAACAGCATGACTTTTTCA	0	49	49	AGAGTGCCATG	49	60	11	CC	60	62	2	CGAA	62	66	4	GG	66	68	2		68	68	0	CATGGCACTCT	68	79	11	AGAAAA	79	85	6
672	caatgcttctcgtgatacccagatcatatgaaacagcatgactttttcaagagtgccatgcccgaaggGTCCTCGGGCATGGCACCCTTCGGGCAT	1	caatgcttctcgtgatacccagatcatatgaaacagcatgactttttcaagagtgcc GTCCTCGG atgcccgaagg G TACGGGCTTCCCACGGTAC	CAATGCTTCTCGTGATACCCAGATCATATGAAACAGCATGACTTTTTCAAGAGTGCC	0	57	57	ATGCCCGAAGG	57	68	11		68	68	0		68	68	0		68	68	0	GTCCTCGGGCATGGCAC	68	85	17	CCTTCGGGCAT	85	96	11		96	96	0
673	caatgcttctcgtgatacccagatcatatgaaacagcatgactttttcaagagtgccatgcccgaaggCACTCTTGAAAAT	1	caatgcttctcgtgatacccagatcatatgaaacagcatgact atgc ttttcaagagtgcc c AAAAGTTCTCACggaagc T	CAATGCTTCTCGTGATACCCAGATCATATGAAACAGCATGACT	0	43	43	TTTTCAAGAGTG	43	55	12	CC	55	57	2	ATGCCCGAA	57	66	9	GG	66	68	2		68	68	0	CACTCTTGAAAA	68	80	12	T	80	81	1
674	caatgcttctcgtgatacccagatcatatgaaacagcatgactttttcaagagtgccatgcccgaaggGGCATGGCACTCTTGAAAAGTCATGAT	1	caatgcttctcgtgatacccagatcatatgaaacagcatgact g ttttcaagagtgccatgccc a AAAAGTTCTCACGGTACGGg a TAGTACTG g	CAATGCTTCTCGTGATACCCAGATCATATGAAACAGCATGACT	0	43	43	TTTTCAAGAGTGCCATGCC	43	62	19	C	62	63	1	GAAG	63	67	4	G	67	68	1		68	68	0	GGCATGGCACTCTTGAAAA	68	87	19	GTCATGAT	87	95	8
675	caatgcttctcgtgatacccagatcatatgaaacagcatgactttttcaagagtgccatgcccgaaggTCATGCTGTTTCATAA	1	caatgcttctcgtgatacccagatca tttttcaagagt tatgaaacagcatgac g ATACTTTGTCGTACTggaagcccgtacc A	CAATGCTTCTCGTGATACCCAGATCA	0	26	26	TATGAAACAGCATGA	26	41	15	C	41	42	1	TTTTTCAAGAGTGCCATGCCCGAAG	42	67	25	G	67	68	1		68	68	0	TCATGCTGTTTCATA	68	83	15	A	83	84	1
676	caatgcttctcgtgatacccagatcatatgaaacagcatgactttttcaagagtgccatgcccgaaggCCATGCTGTTTCATATGAAACAGCATGGCCTTCGGGCAT	1	caatgcttctcgtgatacccaga actttttcaagagt tcatatgaaacagcatg g AGTATACTTTGTCGTACCggaagcccgtacc TACGGGCTTCCGGTACGACAA	CAATGCTTCTCGTGATACCCAGA	0	23	23	TCATATGAAACAGCATG	23	40	17		40	40	0	ACTTTTTCAAGAGTGCCATGCCCGAAGG	40	68	28		68	68	0	C	68	69	1	CATGCTGTTTCATATGA	69	86	17	AACAGCATGGCCTTCGGGCAT	86	107	21
677	caatgcttctcgtgatacccagatcatatgaaacagcatgactttttcaagagtgccatgcccgaaggGGTATCACGAGAAGCATTGT	1	agatcatatgaaacagcatgact caatgcttctcgtgataccc t GTTACGAAGAGCACTATGGggaagcccgtaccgtgagaacttt T		0	0	0	CAATGCTTCTCGTGATACC	0	19	19	C	19	20	1	AGATCATATGAAACAGCATGACTTTTTCAAGAGTGCCATGCCCGAAG	20	67	47	G	67	68	1		68	68	0	GGTATCACGAGAAGCATTG	68	87	19	T	87	88	1
678	caatgcttctcgtgatacccagatcatatgaaacagcatgactttttcaagagtgccatgcccgaaggCCTC	1	caatgcttctcgtgatacccagatcatatgaaacagcatgactttttcaagagtgccatgcccga agg TCC C	CAATGCTTCTCGTGATACCCAGATCATATGAAACAGCATGACTTTTTCAAGAGTGCCATGCCCGA	0	65	65	AGG	65	68	3		68	68	0		68	68	0		68	68	0		68	68	0	CCT	68	71	3	C	71	72	1
679	caatgcttctcgtgatacccagatcatatgaaacagcatgactttttcaagagtgccatgcccgaaggCACTCTTGAAAAAGACAT	1	caatgcttctcgtgatacccagatcatatgaaacagcatga atgc ctttttcaagagtgcc c GAAAAAGTTCTCACggaagc TACA	CAATGCTTCTCGTGATACCCAGATCATATGAAACAGCATGA	0	41	41	CTTTTTCAAGAGTG	41	55	14	CC	55	57	2	ATGCCCGAA	57	66	9	GG	66	68	2		68	68	0	CACTCTTGAAAAAG	68	82	14	ACAT	82	86	4
680	caatgcttctcgtgatacccagatcatatgaaacagcatgactttttcaagagtgccatgcccgaaggGTCATGCTGTTTCATAAG	1	caatgcttctcgtgatacccagatca tttttcaagagt tatgaaacagcatgac g ATACTTTGTCGTACTG c GA ggaagcccgtac	CAATGCTTCTCGTGATACCCAGATCA	0	26	26	TATGAAACAGCATGAC	26	42	16		42	42	0	TTTTTCAAGAGTGCCATGCCCGAAGG	42	68	26		68	68	0		68	68	0	GTCATGCTGTTTCATA	68	84	16	AG	84	86	2
681	caatgcttctcgtgatacccagatcatatgaaacagcatgactttttcaagagtgccatgcccgaaggTCATGCTGTTTCATAAGATCTGGGTATCACG	1	caatgcttctcgtgatacccagatca tttttcaagagt tatgaaacagcatgac g ATACTTTGTCGTACTggaagcccgtacc GCACTATGGGTCTAGA	CAATGCTTCTCGTGATACCCAGATCA	0	26	26	TATGAAACAGCATGA	26	41	15	C	41	42	1	TTTTTCAAGAGTGCCATGCCCGAAG	42	67	25	G	67	68	1		68	68	0	TCATGCTGTTTCATA	68	83	15	AGATCTGGGTATCACG	83	99	16
682	caatgcttctcgtgatacccagatcatatgaaacagcatgactttttcaagagtgccatgcccgaaggCATGGCACTCTGG	1	caatgcttctcgtgatacccagatcatatgaaacagcatgactttttca c agagtgccatgcc g TCTCACGGTACgg a GG a	CAATGCTTCTCGTGATACCCAGATCATATGAAACAGCATGACTTTTTCA	0	49	49	AGAGTGCCATG	49	60	11	CC	60	62	2	CGAA	62	66	4	GG	66	68	2		68	68	0	CATGGCACTCT	68	79	11	GG	79	81	2
683	caatgcttctcgtgatacccagatcatatgaaacagcatgactttttcaagagtgccatgcccgaaggCACTCTTGAAAC	1	caatgcttctcgtgatacccagatcatatgaaacagcatgactt atgc tttcaagagtgcc c AAAGTTCTCACggaagc C	CAATGCTTCTCGTGATACCCAGATCATATGAAACAGCATGACTT	0	44	44	TTTCAAGAGTG	44	55	11	CC	55	57	2	ATGCCCGAA	57	66	9	GG	66	68	2		68	68	0	CACTCTTGAAA	68	79	11	C	79	80	1
684	caatgcttctcgtgatacccagatcatatgaaacagcatgactttttcaagagtgccatgcccgaaggGCATGGCACTCTTGAAAAAGACC	1	caatgcttctcgtgatacccagatcatatgaaacagcatga g ctttttcaagagtgccatgccc a GAAAAAGTTCTCACGGTACGgga CCA	CAATGCTTCTCGTGATACCCAGATCATATGAAACAGCATGA	0	41	41	CTTTTTCAAGAGTGCCATGC	41	61	20	CC	61	63	2	GAA	63	66	3	GG	66	68	2		68	68	0	GCATGGCACTCTTGAAAAAG	68	88	20	ACC	88	91	3
685	caatgcttctcgtgatacccagatcatatgaaacagcatgactttttcaagagtgccatgcccgaaggCCTGGCACTCATGAAAAAG	1	caatgcttctcgtgatacccagatcatatgaaacagcatgactttttcaa tgccc gagtgcca g CTCACGGT a GAAAAAGTA CCgga	CAATGCTTCTCGTGATACCCAGATCATATGAAACAGCATGACTTTTTCAA	0	50	50	GAGTGCCA	50	58	8		58	58	0	TGCCCGAAGG	58	68	10		68	68	0	CC	68	70	2	TGGCACTC	70	78	8	ATGAAAAAG	78	87	9
686	caatgcttctcgtgatacccagatcatatgaaacagcatgactttttcaagagtgccatgcccgaaggGTCATGCTGTTTCATAGA	1	caatgcttctcgtgatacccagatca tttttcaagagt tatgaaacagcatgac g ATACTTTGTCGTACTG c AG ggaagcccgtac	CAATGCTTCTCGTGATACCCAGATCA	0	26	26	TATGAAACAGCATGAC	26	42	16		42	42	0	TTTTTCAAGAGTGCCATGCCCGAAGG	42	68	26		68	68	0		68	68	0	GTCATGCTGTTTCATA	68	84	16	GA	84	86	2
687	caatgcttctcgtgatacccagatcatatgaaacagcatgactttttcaagagtgccatgcccgaaggGTATCACGAGACAATGCTTCTCGTGATACCCC	1	caatgct agatcatatgaaacagcatgac tctcgtgataccc t AGAGCACTATGgg t CCCCATAGTGCTCTTCGTAAC aagcccgtaccgtgagaacttt	CAATGCT	0	7	7	TCTCGTGATAC	7	18	11	CC	18	20	2	AGATCATATGAAACAGCATGACTTTTTCAAGAGTGCCATGCCCGAA	20	66	46	GG	66	68	2		68	68	0	GTATCACGAGA	68	79	11	CAATGCTTCTCGTGATACCCC	79	100	21
688	caatgcttctcgtgatacccagatcatatgaaacagcatgactttttcaagagtgccatgcccgaaggGCATGGCACTCTTGAAAAAGA	1	caatgcttctcgtgatacccagatcatatgaaacagcatga g ctttttcaagagtgccatgccc a GAAAAAGTTCTCACGGTACGgga A	CAATGCTTCTCGTGATACCCAGATCATATGAAACAGCATGA	0	41	41	CTTTTTCAAGAGTGCCATGC	41	61	20	CC	61	63	2	GAA	63	66	3	GG	66	68	2		68	68	0	GCATGGCACTCTTGAAAAAG	68	88	20	A	88	89	1
689	caatgcttctcgtgatacccagatcatatgaaacagcatgactttttcaagagtgccatgcccgaaggTATGAAACAGCATGGCCTTCGGGCATGGCAA	1	caatgcttctcgtgatacccagatcatatgaaacagcatgactttttcaagag TATGAAA tgccatgcccgaagg C ACGGTACGGGCTTCCGGTACGA A	CAATGCTTCTCGTGATACCCAGATCATATGAAACAGCATGACTTTTTCAAGAG	0	53	53	TGCCATGCCCGAAGG	53	68	15		68	68	0		68	68	0		68	68	0	TATGAAACAGCATGG	68	83	15	CCTTCGGGCATGGCA	83	98	15	A	98	99	1
690	caatgcttctcgtgatacccagatcatatgaaacagcatgactttttcaagagtgccatgcccgaaggGTATCACGAGATACCCTTTGGGCATGGC	1	caatgct agatcatatgaaacagcatgac tctcgtgataccc t AGAGCACTATGgg t CGGTACGGGTTTCCCAT aagcccgtaccgtgagaacttt	CAATGCT	0	7	7	TCTCGTGATAC	7	18	11	CC	18	20	2	AGATCATATGAAACAGCATGACTTTTTCAAGAGTGCCATGCCCGAA	20	66	46	GG	66	68	2		68	68	0	GTATCACGAGA	68	79	11	TACCCTTTGGGCATGGC	79	96	17
691	caatgcttctcgtgatacccagatcatatgaaacagcatgactttttcaagagtgccatgcccgaaggGGCATGGCACTCTTGAAGTCATGCTTCAAGAGT	1	caatgcttctcgtgatacccagatcatatgaaacagcatgacttt g ttcaagagtgccatgccc a AAGTTCTCACGGTACGGg a TGAGAACTTCGTACTG g	CAATGCTTCTCGTGATACCCAGATCATATGAAACAGCATGACTTT	0	45	45	TTCAAGAGTGCCATGCC	45	62	17	C	62	63	1	GAAG	63	67	4	G	67	68	1		68	68	0	GGCATGGCACTCTTGAA	68	85	17	GTCATGCTTCAAGAGT	85	101	16
692	caatgcttctcgtgatacccagatcatatgaaacagcatgactttttcaagagtgccatgcccgaaggTGG	1	caatgcttctcgtgatacccagatcatatgaaacagcatgactttttcaagagtg tgcc cca c GGT g ggaa	CAATGCTTCTCGTGATACCCAGATCATATGAAACAGCATGACTTTTTCAAGAGTG	0	55	55	CCA	55	58	3		58	58	0	TGCCCGAAGG	58	68	10		68	68	0		68	68	0	TGG	68	71	3		71	71	0
693	caatgcttctcgtgatacccagatcatatgaaacagcatgactttttcaagagtgccatgcccgaaggGGAAGCATTGA	1	tcgtgatacccagatcatatgaaacagca caatgcttc t GTTACGAAG g A Gggaagcccgtaccgtgagaactttttca		0	0	0	CAATGCTTC	0	9	9		9	9	0	TCGTGATACCCAGATCATATGAAACAGCATGACTTTTTCAAGAGTGCCATGCCCGAAGG	9	68	59		68	68	0	G	68	69	1	GAAGCATTG	69	78	9	A	78	79	1
694	caatgcttctcgtgatacccagatcatatgaaacagcatgactttttcaagagtgccatgcccgaaggCATTGCACTCTTGAAAAA	1	caatgcttctcgtgatacccagatcatatgaaacagcatgac atgc tttttcaagagtgc----c c AAAAAGTTCTCACGTTACg c gaag	CAATGCTTCTCGTGATACCCAGATCATATGAAACAGCATGAC	0	42	42	TTTTTCAAGAGTGC	42	56	14	C	56	57	1	ATGCCCGAAG	57	67	10	G	67	68	1	CATT	68	72	4	GCACTCTTGAAAAA	72	86	14		86	86	0
695	caatgcttctcgtgatacccagatcatatgaaacagcatgactttttcaagagtgccatgcccgaaggGCT	1	caatgcttctcgtgatacccagatcatatgaaacagcatgactttttcaagagtgccat g gccc a CGgga T	CAATGCTTCTCGTGATACCCAGATCATATGAAACAGCATGACTTTTTCAAGAGTGCCAT	0	59	59	GC	59	61	2	CC	61	63	2	GAA	63	66	3	GG	66	68	2		68	68	0	GC	68	70	2	T	70	71	1
696	caatgcttctcgtgatacccagatcatatgaaacagcatgactttttcaagagtgccatgcccgaaggTGGAATTCACGGTTATGAGCAATTCCAGTCACTGACCT	1	caatgcttctcgtgatacccagatcatatgaaacagcatgactttttcaagagtg tgcc cca c GGT g TCCAGTCACTGACCTTAACGAGTATTGGCACTTAA ggaa	CAATGCTTCTCGTGATACCCAGATCATATGAAACAGCATGACTTTTTCAAGAGTG	0	55	55	CCA	55	58	3		58	58	0	TGCCCGAAGG	58	68	10		68	68	0		68	68	0	TGG	68	71	3	AATTCACGGTTATGAGCAATTCCAGTCACTGACCT	71	106	35
697	caatgcttctcgtgatacccagatcatatgaaacagcatgactttttcaagagtgccatgcccgaaggCACTCTTGAAAAAGTT	1	caatgcttctcgtgatacccagatcatatgaaacagcatg atgc actttttcaagagtgcc c TGAAAAAGTTCTCACggaagc T	CAATGCTTCTCGTGATACCCAGATCATATGAAACAGCATG	0	40	40	ACTTTTTCAAGAGTG	40	55	15	CC	55	57	2	ATGCCCGAA	57	66	9	GG	66	68	2		68	68	0	CACTCTTGAAAAAGT	68	83	15	T	83	84	1
698	caatgcttctcgtgatacccagatcatatgaaacagcatgactttttcaagagtgccatgcccgaaggGGTATCACGAGAAGCATTGA	1	agatcatatgaaacagcatgact caatgcttctcgtgataccc t GTTACGAAGAGCACTATGGggaagcccgtaccgtgagaacttt A		0	0	0	CAATGCTTCTCGTGATACC	0	19	19	C	19	20	1	AGATCATATGAAACAGCATGACTTTTTCAAGAGTGCCATGCCCGAAG	20	67	47	G	67	68	1		68	68	0	GGTATCACGAGAAGCATTG	68	87	19	A	87	88	1
699	caatgcttctcgtgatacccagatcatatgaaacagcatgactttttcaagagtgccatgcccgaaggCACTCTTGAAAAAGTCATACT	1	caatgcttctcgtgatacccagatcatatgaaacagc atgc atgactttttcaagagtgcc c TACTGAAAAAGTTCTCACggaagc TCA	CAATGCTTCTCGTGATACCCAGATCATATGAAACAGC	0	37	37	ATGACTTTTTCAAGAGTG	37	55	18	CC	55	57	2	ATGCCCGAA	57	66	9	GG	66	68	2		68	68	0	CACTCTTGAAAAAGTCAT	68	86	18	ACT	86	89	3
700	caatgcttctcgtgatacccagatcatatgaaacagcatgactttttcaagagtgccatgcccgaaggCACTCTTGAAAAAGTGCCTTCGGGCAT	1	caatgcttctcgtgatacccagatcatatgaaacagcatg atgc actttttcaagagtgcc c TGAAAAAGTTCTCACggaagc TACGGGCTTCCG	CAATGCTTCTCGTGATACCCAGATCATATGAAACAGCATG	0	40	40	ACTTTTTCAAGAGTG	40	55	15	CC	55	57	2	ATGCCCGAA	57	66	9	GG	66	68	2		68	68	0	CACTCTTGAAAAAGT	68	83	15	GCCTTCGGGCAT	83	95	12
701	caatgcttctcgtgatacccagatcatatgaaacagcatgactttttcaagagtgccatgcccgaaggGACAT	1	caatgcttctcgtgatacccagatcatatgaaacagcatgactttttcaaga gccatgc gt c CAGggaagc TA	CAATGCTTCTCGTGATACCCAGATCATATGAAACAGCATGACTTTTTCAAGA	0	52	52	GT	52	54	2		54	54	0	GCCATGCCCGAAGG	54	68	14		68	68	0	G	68	69	1	AC	69	71	2	AT	71	73	2
702	caatgcttctcgtgatacccagatcatatgaaacagcatgactttttcaagagtgccatgcccgaaggTCATGCTGTTTCATAACCTTCGGGCA	1	caatgcttctcgtgatacccagatca tttttcaagagt tatgaaacagcatgac g ATACTTTGTCGTACTggaagcccgtacc ACGGGCTTCCA	CAATGCTTCTCGTGATACCCAGATCA	0	26	26	TATGAAACAGCATGA	26	41	15	C	41	42	1	TTTTTCAAGAGTGCCATGCCCGAAG	42	67	25	G	67	68	1		68	68	0	TCATGCTGTTTCATA	68	83	15	ACCTTCGGGCA	83	94	11
703	caatgcttctcgtgatacccagatcatatgaaacagcatgactttttcaagagtgccatgcccgaaggCCATGC	1	caatgcttctcgtgatacccagatcatatgaaaca actttttcaagagt gcatg g CGTACCggaagcccgtacc	CAATGCTTCTCGTGATACCCAGATCATATGAAACA	0	35	35	GCATG	35	40	5		40	40	0	ACTTTTTCAAGAGTGCCATGCCCGAAGG	40	68	28		68	68	0	C	68	69	1	CATGC	69	74	5		74	74	0
704	caatgcttctcgtgatacccagatcatatgaaacagcatgactttttcaagagtgccatgcccgaaggCCAATGCCCGAA	1	caatgcttctcgtgatacccagatcatatgaaacagcatgactttttcaagagtgcca c tg-cc g ACCgg a AAGCCCGTA a	CAATGCTTCTCGTGATACCCAGATCATATGAAACAGCATGACTTTTTCAAGAGTGCCA	0	58	58	TG	58	60	2	CC	60	62	2	CGAA	62	66	4	GG	66	68	2	C	68	69	1	CA	69	71	2	ATGCCCGAA	71	80	9
705	caatgcttctcgtgatacccagatcatatgaaacagcatgactttttcaagagtgccatgcccgaaggGTCATGCTGTTTCATGACCCTTCGGGCA	1	caatgcttctcgtgatacccagatcat tttttcaagagt atgaaacagcatgac g TACTTTGTCGTACTG c ACGGGCTTCCCAG ggaagcccgtac	CAATGCTTCTCGTGATACCCAGATCAT	0	27	27	ATGAAACAGCATGAC	27	42	15		42	42	0	TTTTTCAAGAGTGCCATGCCCGAAGG	42	68	26		68	68	0		68	68	0	GTCATGCTGTTTCAT	68	83	15	GACCCTTCGGGCA	83	96	13
706	caatgcttctcgtgatacccagatcatatgaaacagcatgactttttcaagagtgccatgcccgaaggGGCATTGAT	1	caatgcttctcgtgatacccagatcatatgaaacagcatgactttttcaagagtgcc g atgccc a TACGGg a TAGT g	CAATGCTTCTCGTGATACCCAGATCATATGAAACAGCATGACTTTTTCAAGAGTGCC	0	57	57	ATGCC	57	62	5	C	62	63	1	GAAG	63	67	4	G	67	68	1		68	68	0	GGCAT	68	73	5	TGAT	73	77	4
707	caatgcttctcgtgatacccagatcatatgaaacagcatgactttttcaagagtgccatgcccgaaggGCATGGCACTCTAGAAAAGTCATGCTGT	1	caatgcttctcgtgatacccagatcatatgaaacagcatgactttttca g agagtgccatgccc a TCTCACGGTACGgga TGTCGTACTGAAAAGA	CAATGCTTCTCGTGATACCCAGATCATATGAAACAGCATGACTTTTTCA	0	49	49	AGAGTGCCATGC	49	61	12	CC	61	63	2	GAA	63	66	3	GG	66	68	2		68	68	0	GCATGGCACTCT	68	80	12	AGAAAAGTCATGCTGT	80	96	16
708	caatgcttctcgtgatacccagatcatatgaaacagcatgactttttcaagagtgccatgcccgaaggTCATGCTGTTTCATATGATCTAGG	1	caatgcttctcgtgataccc tttttcaagagt agatcatatgaaacagcatgac g TCTAGTATACTTTGTCGTACTggaagcccgtacc GGA	CAATGCTTCTCGTGATACCC	0	20	20	AGATCATATGAAACAGCATGA	20	41	21	C	41	42	1	TTTTTCAAGAGTGCCATGCCCGAAG	42	67	25	G	67	68	1		68	68	0	TCATGCTGTTTCATATGATCT	68	89	21	AGG	89	92	3
709	caatgcttctcgtgatacccagatcatatgaaacagcatgactttttcaagagtgccatgcccgaaggTCATGCTGTTTCATATGACCTTCGGG	1	caatgcttctcgtgatacccaga tttttcaagagt tcatatgaaacagcatgac g AGTATACTTTGTCGTACTggaagcccgtacc GGGCTTCC	CAATGCTTCTCGTGATACCCAGA	0	23	23	TCATATGAAACAGCATGA	23	41	18	C	41	42	1	TTTTTCAAGAGTGCCATGCCCGAAG	42	67	25	G	67	68	1		68	68	0	TCATGCTGTTTCATATGA	68	86	18	CCTTCGGG	86	94	8
710	caatgcttctcgtgatacccagatcatatgaaacagcatgactttttcaagagtgccatgcccgaaggATCACTTCCTTCGGGCATG	1	caatgcttctcgtgatacccagatcatatgaaacagcatgactttttcaagagtgc ATC catgcccgaagg A GTACGGGCTTCCTTC	CAATGCTTCTCGTGATACCCAGATCATATGAAACAGCATGACTTTTTCAAGAGTGC	0	56	56	CATGCCCGAAGG	56	68	12		68	68	0		68	68	0		68	68	0	ATCACTT	68	75	7	CCTTCGGGCATG	75	87	12		87	87	0
711	caatgcttctcgtgatacccagatcatatgaaacagcatgactttttcaagagtgccatgcccgaaggGCATGGCACTCTTGAAAAATGTTT	1	caatgcttctcgtgatacccagatcatatgaaacagcatgac g tttttcaagagtgccatgccc a AAAAAGTTCTCACGGTACGgga TTTGT	CAATGCTTCTCGTGATACCCAGATCATATGAAACAGCATGAC	0	42	42	TTTTTCAAGAGTGCCATGC	42	61	19	CC	61	63	2	GAA	63	66	3	GG	66	68	2		68	68	0	GCATGGCACTCTTGAAAAA	68	87	19	TGTTT	87	92	5
712	caatgcttctcgtgatacccagatcatatgaaacagcatgactttttcaagagtgccatgcccgaaggTCATGCTGTTTCATATGATCTGACCC	1	caatgcttctcgtgatacc tttttcaagagt cagatcatatgaaacagcatgac g GTCTAGTATACTTTGTCGTACTggaagcccgtacc CCCA	CAATGCTTCTCGTGATACC	0	19	19	CAGATCATATGAAACAGCATGA	19	41	22	C	41	42	1	TTTTTCAAGAGTGCCATGCCCGAAG	42	67	25	G	67	68	1		68	68	0	TCATGCTGTTTCATATGATCTG	68	90	22	ACCC	90	94	4
713	caatgcttctcgtgatacccagatcatatgaaacagcatgactttttcaagagtgccatgcccgaaggCCTGGCACTCTTGAAAAAGTCA	1	caatgcttctcgtgatacccagatcatatgaaacagca tgccc tgactttttcaagagtgcca g ACTGAAAAAGTTCTCACGGT a CCgga	CAATGCTTCTCGTGATACCCAGATCATATGAAACAGCA	0	38	38	TGACTTTTTCAAGAGTGCCA	38	58	20		58	58	0	TGCCCGAAGG	58	68	10		68	68	0	CC	68	70	2	TGGCACTCTTGAAAAAGTCA	70	90	20		90	90	0
714	caatgcttctcgtgatacccagatcatatgaaacagcatgactttttcaagagtgccatgcccgaaggACCCTTCGGTCAATGCTTCTC	1	caatgcttctcgtgatacccagatcatatgaaacagcatgactttttcaagagtgccatgc g ccgaag A GGCTTCCC CTCTTCGTAACT	CAATGCTTCTCGTGATACCCAGATCATATGAAACAGCATGACTTTTTCAAGAGTGCCATGC	0	61	61	CCGAAGG	61	68	7		68	68	0		68	68	0		68	68	0	AC	68	70	2	CCTTCGG	70	77	7	TCAATGCTTCTC	77	89	12
715	caatgcttctcgtgatacccagatcatatgaaacagcatgactttttcaagagtgccatgcccgaaggGGCATTGAA	1	caatgcttctcgtgatacccagatcatatgaaacagcatgactttttcaagagtgcc g atgccc a TACGGg a AAGT g	CAATGCTTCTCGTGATACCCAGATCATATGAAACAGCATGACTTTTTCAAGAGTGCC	0	57	57	ATGCC	57	62	5	C	62	63	1	GAAG	63	67	4	G	67	68	1		68	68	0	GGCAT	68	73	5	TGAA	73	77	4
716	caatgcttctcgtgatacccagatcatatgaaacagcatgactttttcaagagtgccatgcccgaaggTCATGCTGTTTCATATGAAACAGCATGACCTTC	1	caatgcttctcgtgatacccaga tttttcaagagt tcatatgaaacagcatgac g AGTATACTTTGTCGTACTggaagcccgtacc CTTCCAGTACGACAA	CAATGCTTCTCGTGATACCCAGA	0	23	23	TCATATGAAACAGCATGA	23	41	18	C	41	42	1	TTTTTCAAGAGTGCCATGCCCGAAG	42	67	25	G	67	68	1		68	68	0	TCATGCTGTTTCATATGA	68	86	18	AACAGCATGACCTTC	86	101	15
717	caatgcttctcgtgatacccagatcatatgaaacagcatgactttttcaagagtgccatgcccgaaggCCATGCTGTTTCATATGATCTGG	1	caatgcttctcgtgatac actttttcaagagt ccagatcatatgaaacagcatg g GGTCTAGTATACTTTGTCGTACCggaagcccgtacc	CAATGCTTCTCGTGATAC	0	18	18	CCAGATCATATGAAACAGCATG	18	40	22		40	40	0	ACTTTTTCAAGAGTGCCATGCCCGAAGG	40	68	28		68	68	0	C	68	69	1	CATGCTGTTTCATATGATCTGG	69	91	22		91	91	0
718	caatgcttctcgtgatacccagatcatatgaaacagcatgactttttcaagagtgccatgcccgaaggCATGGCACTCA	1	caatgcttctcgtgatacccagatcatatgaaacagcatgactttttcaa c gagtgccatgcc g CTCACGGTACgg a A a	CAATGCTTCTCGTGATACCCAGATCATATGAAACAGCATGACTTTTTCAA	0	50	50	GAGTGCCATG	50	60	10	CC	60	62	2	CGAA	62	66	4	GG	66	68	2		68	68	0	CATGGCACTC	68	78	10	A	78	79	1
719	caatgcttctcgtgatacccagatcatatgaaacagcatgactttttcaagagtgccatgcccgaaggGCATGGCAATCT	1	caatgcttctcgtgatacccagatcatatgaaacagcatgactttttcaagag g tgccatgccc a ACGGTACGgga TCTA	CAATGCTTCTCGTGATACCCAGATCATATGAAACAGCATGACTTTTTCAAGAG	0	53	53	TGCCATGC	53	61	8	CC	61	63	2	GAA	63	66	3	GG	66	68	2		68	68	0	GCATGGCA	68	76	8	ATCT	76	80	4
720	caatgcttctcgtgatacccagatcatatgaaacagcatgactttttcaagagtgccatgcccgaaggGCATGGCACTCAA	1	caatgcttctcgtgatacccagatcatatgaaacagcatgactttttcaa g gagtgccatgccc a CTCACGGTACGgga AA	CAATGCTTCTCGTGATACCCAGATCATATGAAACAGCATGACTTTTTCAA	0	50	50	GAGTGCCATGC	50	61	11	CC	61	63	2	GAA	63	66	3	GG	66	68	2		68	68	0	GCATGGCACTC	68	79	11	AA	79	81	2
721	caatgcttctcgtgatacccagatcatatgaaacagcatgactttttcaagagtgccatgcccgaaggGTATCACGGGAAGCATTGAT	1	caatgcttct agatcatatgaaacagcatgac cgtgataccc t GCACTATGgg t TAGTTACGAAGG aagcccgtaccgtgagaacttt	CAATGCTTCT	0	10	10	CGTGATAC	10	18	8	CC	18	20	2	AGATCATATGAAACAGCATGACTTTTTCAAGAGTGCCATGCCCGAA	20	66	46	GG	66	68	2		68	68	0	GTATCACG	68	76	8	GGAAGCATTGAT	76	88	12
722	caatgcttctcgtgatacccagatcatatgaaacagcatgactttttcaagagtgccatgcccgaaggGGCATGGCACTCTTGAAAGTCATGCTGT	1	caatgcttctcgtgatacccagatcatatgaaacagcatgactt g tttcaagagtgccatgccc a AAAGTTCTCACGGTACGGg a TGTCGTACTG g	CAATGCTTCTCGTGATACCCAGATCATATGAAACAGCATGACTT	0	44	44	TTTCAAGAGTGCCATGCC	44	62	18	C	62	63	1	GAAG	63	67	4	G	67	68	1		68	68	0	GGCATGGCACTCTTGAAA	68	86	18	GTCATGCTGT	86	96	10
723	caatgcttctcgtgatacccagatcatatgaaacagcatgactttttcaagagtgccatgcccgaaggGGCATGGCTCTCTTGAAAAAGTC	1	caatgcttctcgtgatacccagatcatatgaaacagcatgactttttcaagagt g gccatgccc a CGGTACGGg a CTGAAAAAGTTCTCT g	CAATGCTTCTCGTGATACCCAGATCATATGAAACAGCATGACTTTTTCAAGAGT	0	54	54	GCCATGCC	54	62	8	C	62	63	1	GAAG	63	67	4	G	67	68	1		68	68	0	GGCATGGC	68	76	8	TCTCTTGAAAAAGTC	76	91	15
724	caatgcttctcgtgatacccagatcatatgaaacagcatgactttttcaagagtgccatgcccgaaggGCAATGCTTCTCC	1	caatgcttctcgtgatacccagatcatatgaaacagcatgactttttcaagagtgcca g tgccc a ACGgga CCTCTTCGTA	CAATGCTTCTCGTGATACCCAGATCATATGAAACAGCATGACTTTTTCAAGAGTGCCA	0	58	58	TGC	58	61	3	CC	61	63	2	GAA	63	66	3	GG	66	68	2		68	68	0	GCA	68	71	3	ATGCTTCTCC	71	81	10
725	caatgcttctcgtgatacccagatcatatgaaacagcatgactttttcaagagtgccatgcccgaaggGAGAAGC	1	caat gtgatacccagatcatatgaaacagcat gcttctc g CGAAGAGggaagcccgtaccgtgagaactttttca	CAAT	0	4	4	GCTTCTC	4	11	7		11	11	0	GTGATACCCAGATCATATGAAACAGCATGACTTTTTCAAGAGTGCCATGCCCGAAGG	11	68	57		68	68	0		68	68	0	GAGAAGC	68	75	7		75	75	0
726	caatgcttctcgtgatacccagatcatatgaaacagcatgactttttcaagagtgccatgcccgaaggGTATCGCGAGAAGCATTGA	1	caatgcttctcgt agatcatatgaaacagcatgac gataccc t CTATGgg t AGTTACGAAGAGCG aagcccgtaccgtgagaacttt	CAATGCTTCTCGT	0	13	13	GATAC	13	18	5	CC	18	20	2	AGATCATATGAAACAGCATGACTTTTTCAAGAGTGCCATGCCCGAA	20	66	46	GG	66	68	2		68	68	0	GTATC	68	73	5	GCGAGAAGCATTGA	73	87	14
727	caatgcttctcgtgatacccagatcatatgaaacagcatgactttttcaagagtgccatgcccgaaggCATTGAGGGCATGGCACT	1	ttctcgtgatacccagatcatatgaaacag caatgc c GTTACggaagcccgtaccgtgagaactttttcagta TCACGGTACGGGA		0	0	0	CAATG	0	5	5	C	5	6	1	TTCTCGTGATACCCAGATCATATGAAACAGCATGACTTTTTCAAGAGTGCCATGCCCGAAG	6	67	61	G	67	68	1		68	68	0	CATTG	68	73	5	AGGGCATGGCACT	73	86	13
728	caatgcttctcgtgatacccagatcatatgaaacagcatgactttttcaagagtgccatgcccgaaggTCATGCTGTTGATTCATATGTGGGTATCA	1	caatgcttctcgtgatacccagatcatatga tttttcaagagt aacagcatgac g TTGTCGTACTggaagcccgtacc ACTATGGGTGTATACTTAG	CAATGCTTCTCGTGATACCCAGATCATATGA	0	31	31	AACAGCATGA	31	41	10	C	41	42	1	TTTTTCAAGAGTGCCATGCCCGAAG	42	67	25	G	67	68	1		68	68	0	TCATGCTGTT	68	78	10	GATTCATATGTGGGTATCA	78	97	19
729	caatgcttctcgtgatacccagatcatatgaaacagcatgactttttcaagagtgccatgcccgaaggCCACTCTTGAAAAAGTCATGCTT	1	caatgcttctcgtgatacccagatcatatgaaac atgc agcatgactttttcaagagtg-cc c TCGTACTGAAAAAGTTCTCACCggaagc T	CAATGCTTCTCGTGATACCCAGATCATATGAAAC	0	34	34	AGCATGACTTTTTCAAGAGTG	34	55	21	CC	55	57	2	ATGCCCGAA	57	66	9	GG	66	68	2	C	68	69	1	CACTCTTGAAAAAGTCATGCT	69	90	21	T	90	91	1
730	caatgcttctcgtgatacccagatcatatgaaacagcatgactttttcaagagtgccatgcccgaaggTCATGCTGTTTCATGT	1	caatgcttctcgtgatacccagatcat tttttcaagagt atgaaacagcatgac g TACTTTGTCGTACTggaagcccgtacc TG	CAATGCTTCTCGTGATACCCAGATCAT	0	27	27	ATGAAACAGCATGA	27	41	14	C	41	42	1	TTTTTCAAGAGTGCCATGCCCGAAG	42	67	25	G	67	68	1		68	68	0	TCATGCTGTTTCAT	68	82	14	GT	82	84	2
731	caatgcttctcgtgatacccagatcatatgaaacagcatgactttttcaagagtgccatgcccgaaggTCATGCTGTCAATGCTTC	1	caatgcttctcgtgatacccagatcatatgaa tttttcaagagt acagcatgac g TGTCGTACTggaagcccgtacc CTTCGTAAC	CAATGCTTCTCGTGATACCCAGATCATATGAA	0	32	32	ACAGCATGA	32	41	9	C	41	42	1	TTTTTCAAGAGTGCCATGCCCGAAG	42	67	25	G	67	68	1		68	68	0	TCATGCTGT	68	77	9	CAATGCTTC	77	86	9
732	caatgcttctcgtgatacccagatcatatgaaacagcatgactttttcaagagtgccatgcccgaaggTCATGCTGTTTCATATGAATGAAAC	1	caatgcttctcgtgatacccaga tttttcaagagt tcatatgaaacagcatgac g AGTATACTTTGTCGTACTggaagcccgtacc CAAAGTA	CAATGCTTCTCGTGATACCCAGA	0	23	23	TCATATGAAACAGCATGA	23	41	18	C	41	42	1	TTTTTCAAGAGTGCCATGCCCGAAG	42	67	25	G	67	68	1		68	68	0	TCATGCTGTTTCATATGA	68	86	18	ATGAAAC	86	93	7
733	caatgcttctcgtgatacccagatcatatgaaacagcatgactttttcaagagtgccatgcccgaaggGTATCGCACTCTTGAAAAA	1	caatgcttctcgt agatcatatgaaacagcatgac gataccc t CTATGgg t AAAAAGTTCTCACG aagcccgtaccgtgagaacttt	CAATGCTTCTCGT	0	13	13	GATAC	13	18	5	CC	18	20	2	AGATCATATGAAACAGCATGACTTTTTCAAGAGTGCCATGCCCGAA	20	66	46	GG	66	68	2		68	68	0	GTATC	68	73	5	GCACTCTTGAAAAA	73	87	14
734	caatgcttctcgtgatacccagatcatatgaaacagcatgactttttcaagagtgccatgcccgaaggGCAATGCTTCTCCG	1	caatgcttctcgtgatacccagatcatatgaaacagcatgactttttcaagagtgcca g tgccc a ACGgga GCCTCTTCGTA	CAATGCTTCTCGTGATACCCAGATCATATGAAACAGCATGACTTTTTCAAGAGTGCCA	0	58	58	TGC	58	61	3	CC	61	63	2	GAA	63	66	3	GG	66	68	2		68	68	0	GCA	68	71	3	ATGCTTCTCCG	71	82	11
735	caatgcttctcgtgatacccagatcatatgaaacagcatgactttttcaagagtgccatgcccgaaggCATGGCACTCTTGAAAAAGAC	1	caatgcttctcgtgatacccagatcatatgaaacagcatga c ctttttcaagagtgccatgcc g GAAAAAGTTCTCACGGTACgg a CA a	CAATGCTTCTCGTGATACCCAGATCATATGAAACAGCATGA	0	41	41	CTTTTTCAAGAGTGCCATG	41	60	19	CC	60	62	2	CGAA	62	66	4	GG	66	68	2		68	68	0	CATGGCACTCTTGAAAAAG	68	87	19	AC	87	89	2
736	caatgcttctcgtgatacccagatcatatgaaacagcatgactttttcaagagtgccatgcccgaaggTCATGCTGTTTCATATGATCTGG	1	caatgcttctcgtgatac tttttcaagagt ccagatcatatgaaacagcatgac g GGTCTAGTATACTTTGTCGTACTggaagcccgtacc	CAATGCTTCTCGTGATAC	0	18	18	CCAGATCATATGAAACAGCATGA	18	41	23	C	41	42	1	TTTTTCAAGAGTGCCATGCCCGAAG	42	67	25	G	67	68	1		68	68	0	TCATGCTGTTTCATATGATCTGG	68	91	23		91	91	0
737	caatgcttctcgtgatacccagatcatatgaaacagcatgactttttcaagagtgccatgcccgaaggGTAGCATTCCCTTCGGGCAT	1	caatgcttctcgtgatacccagatcatatgaaacagcatgactttttcaagagtgcc GTAG atgcccgaagg C TACGGGCTTCCCTTA	CAATGCTTCTCGTGATACCCAGATCATATGAAACAGCATGACTTTTTCAAGAGTGCC	0	57	57	ATGCCCGAAGG	57	68	11		68	68	0		68	68	0		68	68	0	GTAGCATTC	68	77	9	CCTTCGGGCAT	77	88	11		88	88	0
738	caatgcttctcgtgatacccagatcatatgaaacagcatgactttttcaagagtgccatgcccgaaggCACTCTTGAAAAAGAGTGCCTTCGGGCAT	1	caatgcttctcgtgatacccagatcatatgaaacagcatga atgc ctttttcaagagtgcc c GAAAAAGTTCTCACggaagc TACGGGCTTCCGTGA	CAATGCTTCTCGTGATACCCAGATCATATGAAACAGCATGA	0	41	41	CTTTTTCAAGAGTG	41	55	14	CC	55	57	2	ATGCCCGAA	57	66	9	GG	66	68	2		68	68	0	CACTCTTGAAAAAG	68	82	14	AGTGCCTTCGGGCAT	82	97	15
739	caatgcttctcgtgatacccagatcatatgaaacagcatgactttttcaagagtgccatgcccgaaggCCATGGCACTCTTGAAAAAG	1	caatgcttctcgtgatacccagatcatatgaaacagcatga c ctttttcaagagtgccatg-cc g GAAAAAGTTCTCACGGTACCgg a a	CAATGCTTCTCGTGATACCCAGATCATATGAAACAGCATGA	0	41	41	CTTTTTCAAGAGTGCCATG	41	60	19	CC	60	62	2	CGAA	62	66	4	GG	66	68	2	C	68	69	1	CATGGCACTCTTGAAAAAG	69	88	19		88	88	0
740	caatgcttctcgtgatacccagatcatatgaaacagcatgactttttcaagagtgccatgcccgaaggTACTCTTGAAAAAGTCATGCT	1	caatgcttctcgtgatacccagatcatatgaaac gccatgc agcatgactttttcaagagt c TCGTACTGAAAAAGTTCTCATggaagc	CAATGCTTCTCGTGATACCCAGATCATATGAAAC	0	34	34	AGCATGACTTTTTCAAGAGT	34	54	20		54	54	0	GCCATGCCCGAAGG	54	68	14		68	68	0	T	68	69	1	ACTCTTGAAAAAGTCATGCT	69	89	20		89	89	0
741	caatgcttctcgtgatacccagatcatatgaaacagcatgactttttcaagagtgccatgcccgaaggAAAAAAAAAAGAGCTTCGGGCATGGCACTTTTTTTTTCCTTCGGGCATGGC	1	caatgcttctcgtgatacccagatcatatgaaacagcatgactttttcaagagt AAAAAAAAAAGAGCTTCG gccatgcccgaagg G CGGTACGGGCTTCCTTTTTTTTTCACGGTACG	CAATGCTTCTCGTGATACCCAGATCATATGAAACAGCATGACTTTTTCAAGAGT	0	54	54	GCCATGCCCGAAGG	54	68	14		68	68	0		68	68	0		68	68	0	AAAAAAAAAAGAGCTTCGGGCATGGCACTTTTTTTTT	68	105	37	CCTTCGGGCATGGC	105	119	14		119	119	0
742	caatgcttctcgtgatacccagatcatatgaaacagcatgactttttcaagagtgccatgcccgaaggCACTCTTGAAAAGTCAGCT	1	caatgcttctcgtgatacccagatcatatgaaacagcatgact atgc ttttcaagagtgcc c AAAAGTTCTCACggaagc TCGACTG	CAATGCTTCTCGTGATACCCAGATCATATGAAACAGCATGACT	0	43	43	TTTTCAAGAGTG	43	55	12	CC	55	57	2	ATGCCCGAA	57	66	9	GG	66	68	2		68	68	0	CACTCTTGAAAA	68	80	12	GTCAGCT	80	87	7
743	caatgcttctcgtgatacccagatcatatgaaacagcatgactttttcaagagtgccatgcccgaaggGGCATGGCACTAG	1	caatgcttctcgtgatacccagatcatatgaaacagcatgactttttcaag g agtgccatgccc a TCACGGTACGGg a GA g	CAATGCTTCTCGTGATACCCAGATCATATGAAACAGCATGACTTTTTCAAG	0	51	51	AGTGCCATGCC	51	62	11	C	62	63	1	GAAG	63	67	4	G	67	68	1		68	68	0	GGCATGGCACT	68	79	11	AG	79	81	2
744	caatgcttctcgtgatacccagatcatatgaaacagcatgactttttcaagagtgccatgcccgaaggATGAAAC	1	caatgcttctcgtgatacccagatcatatgaaacagcatgactt agagtgcca tttca t AAAGT g C Aggaagccc	CAATGCTTCTCGTGATACCCAGATCATATGAAACAGCATGACTT	0	44	44	TTTCA	44	49	5		49	49	0	AGAGTGCCATGCCCGAAGG	49	68	19		68	68	0	A	68	69	1	TGAAA	69	74	5	C	74	75	1
745	caatgcttctcgtgatacccagatcatatgaaacagcatgactttttcaagagtgccatgcccgaaggCATTGAACTCTTGAAAAAGTCATGCTGTTTCATAT	1	caatgcttctcgtgatacccagatc gccatgccc atatgaaacagcatgactttttcaagagt g TATACTTTGTCGTACTGAAAAAGTTCTCA a AGTTACgga	CAATGCTTCTCGTGATACCCAGATC	0	25	25	ATATGAAACAGCATGACTTTTTCAAGAGT	25	54	29		54	54	0	GCCATGCCCGAAGG	54	68	14		68	68	0	CATTGA	68	74	6	ACTCTTGAAAAAGTCATGCTGTTTCATAT	74	103	29		103	103	0
746	caatgcttctcgtgatacccagatcatatgaaacagcatgactttttcaagagtgccatgcccgaaggGTATCACGAGAAGCATT	1	c agatcatatgaaacagcatgac aatgcttctcgtgataccc t TTACGAAGAGCACTATGgg t aagcccgtaccgtgagaacttt	C	0	1	1	AATGCTTCTCGTGATAC	1	18	17	CC	18	20	2	AGATCATATGAAACAGCATGACTTTTTCAAGAGTGCCATGCCCGAA	20	66	46	GG	66	68	2		68	68	0	GTATCACGAGAAGCATT	68	85	17		85	85	0
747	caatgcttctcgtgatacccagatcatatgaaacagcatgactttttcaagagtgccatgcccgaaggGCTGTTTC	1	caatgcttctcgtgatacccagatcatat atgactttttcaaga gaaacagc g CTTTGTCGggaagcccgtaccgt	CAATGCTTCTCGTGATACCCAGATCATAT	0	29	29	GAAACAGC	29	37	8		37	37	0	ATGACTTTTTCAAGAGTGCCATGCCCGAAGG	37	68	31		68	68	0		68	68	0	GCTGTTTC	68	76	8		76	76	0
748	caatgcttctcgtgatacccagatcatatgaaacagcatgactttttcaagagtgccatgcccgaaggAGTCGGGCATGGCACCTTCGGGCATC	1	caatgcttctcgtgatacccagatcatatgaaacagcatgactttttcaaga ag gtgccatgcccga g CACGGTACGGGCTGA CTACGGGCTTC	CAATGCTTCTCGTGATACCCAGATCATATGAAACAGCATGACTTTTTCAAGA	0	52	52	GTGCCATGCCCGA	52	65	13		65	65	0	AGG	65	68	3		68	68	0	AG	68	70	2	TCGGGCATGGCAC	70	83	13	CTTCGGGCATC	83	94	11
749	caatgcttctcgtgatacccagatcatatgaaacagcatgactttttcaagagtgccatgcccgaaggCATGGCACTCTTGAAAAAGTCA	1	caatgcttctcgtgatacccagatcatatgaaacagca c tgactttttcaagagtgccatgcc g ACTGAAAAAGTTCTCACGGTACgg a a	CAATGCTTCTCGTGATACCCAGATCATATGAAACAGCA	0	38	38	TGACTTTTTCAAGAGTGCCATG	38	60	22	CC	60	62	2	CGAA	62	66	4	GG	66	68	2		68	68	0	CATGGCACTCTTGAAAAAGTCA	68	90	22		90	90	0
750	caatgcttctcgtgatacccagatcatatgaaacagcatgactttttcaagagtgccatgcccgaaggTATCACGAGACGCATTGAC	1	caatgct cagatcatatgaaacagcatgac tctcgtgatacc t AGAGCACTATggaagcccgtaccgtgagaactttt CAGTTACGC	CAATGCT	0	7	7	TCTCGTGATA	7	17	10	CC	17	19	2	CAGATCATATGAAACAGCATGACTTTTTCAAGAGTGCCATGCCCGAA	19	66	47	GG	66	68	2		68	68	0	TATCACGAGA	68	78	10	CGCATTGAC	78	87	9
751	caatgcttctcgtgatacccagatcatatgaaacagcatgactttttcaagagtgccatgcccgaaggCACTCTTGAAAAAGTCATGCC	1	caatgcttctcgtgatacccagatcatatgaaaca atgc gcatgactttttcaagagtgcc c CGTACTGAAAAAGTTCTCACggaagc C	CAATGCTTCTCGTGATACCCAGATCATATGAAACA	0	35	35	GCATGACTTTTTCAAGAGTG	35	55	20	CC	55	57	2	ATGCCCGAA	57	66	9	GG	66	68	2		68	68	0	CACTCTTGAAAAAGTCATGC	68	88	20	C	88	89	1
752	caatgcttctcgtgatacccagatcatatgaaacagcatgactttttcaagagtgccatgcccgaaggGGCATTGCACTCT	1	caatgcttctcgtgatacccagatcatatgaaacagcatgactttttcaagagtgcc g atgccc a TACGGg a TCTCACGT g	CAATGCTTCTCGTGATACCCAGATCATATGAAACAGCATGACTTTTTCAAGAGTGCC	0	57	57	ATGCC	57	62	5	C	62	63	1	GAAG	63	67	4	G	67	68	1		68	68	0	GGCAT	68	73	5	TGCACTCT	73	81	8
753	caatgcttctcgtgatacccagatcatatgaaacagcatgactttttcaagagtgccatgcccgaaggGCATGGCGCTCTTGAAAAAGTC	1	caatgcttctcgtgatacccagatcatatgaaacagcatgactttttcaagagt g gccatgccc a CGGTACGgga CTGAAAAAGTTCTCG	CAATGCTTCTCGTGATACCCAGATCATATGAAACAGCATGACTTTTTCAAGAGT	0	54	54	GCCATGC	54	61	7	CC	61	63	2	GAA	63	66	3	GG	66	68	2		68	68	0	GCATGGC	68	75	7	GCTCTTGAAAAAGTC	75	90	15
754	caatgcttctcgtgatacccagatcatatgaaacagcatgactttttcaagagtgccatgcccgaaggGTATCACGAGATACCCTTCGGGCG	1	caatgct agatcatatgaaacagcatgac tctcgtgataccc t AGAGCACTATGgg t GCGGGCTTCCCAT aagcccgtaccgtgagaacttt	CAATGCT	0	7	7	TCTCGTGATAC	7	18	11	CC	18	20	2	AGATCATATGAAACAGCATGACTTTTTCAAGAGTGCCATGCCCGAA	20	66	46	GG	66	68	2		68	68	0	GTATCACGAGA	68	79	11	TACCCTTCGGGCG	79	92	13
755	caatgcttctcgtgatacccagatcatatgaaacagcatgactttttcaagagtgccatgcccgaaggCACTCTTGAAAAGTCATGCTGTTTC	1	caatgcttctcgtgatacccagatcatatgaaacagcatgact atgc ttttcaagagtgcc c AAAAGTTCTCACggaagc CTTTGTCGTACTG	CAATGCTTCTCGTGATACCCAGATCATATGAAACAGCATGACT	0	43	43	TTTTCAAGAGTG	43	55	12	CC	55	57	2	ATGCCCGAA	57	66	9	GG	66	68	2		68	68	0	CACTCTTGAAAA	68	80	12	GTCATGCTGTTTC	80	93	13
756	caatgcttctcgtgatacccagatcatatgaaacagcatgactttttcaagagtgccatgcccgaaggGCATGGCACTCTTGAAAGTCATGC	1	caatgcttctcgtgatacccagatcatatgaaacagcatgactt g tttcaagagtgccatgccc a AAAGTTCTCACGGTACGgga CGTACTG	CAATGCTTCTCGTGATACCCAGATCATATGAAACAGCATGACTT	0	44	44	TTTCAAGAGTGCCATGC	44	61	17	CC	61	63	2	GAA	63	66	3	GG	66	68	2		68	68	0	GCATGGCACTCTTGAAA	68	85	17	GTCATGC	85	92	7
757	caatgcttctcgtgatacccagatcatatgaaacagcatgactttttcaagagtgccatgcccgaaggGCCTGGCACTCTTGAGA	1	caatgcttctcgtgatacccagatcatatgaaacagcatgactttt tgcccg tcaagagtgcca a AGTTCTCACGGTCCGgga AG	CAATGCTTCTCGTGATACCCAGATCATATGAAACAGCATGACTTTT	0	46	46	TCAAGAGTGCCA	46	58	12		58	58	0	TGCCCGAAGG	58	68	10		68	68	0	GCC	68	71	3	TGGCACTCTTGA	71	83	12	GA	83	85	2
758	caatgcttctcgtgatacccagatcatatgaaacagcatgactttttcaagagtgccatgcccgaaggAGG	1	caatgctt gtgatacccagatcatatgaaacagca ctc t GAg g G gaagcccgtaccgtgagaactttttca	CAATGCTT	0	8	8	CT	8	10	2	C	10	11	1	GTGATACCCAGATCATATGAAACAGCATGACTTTTTCAAGAGTGCCATGCCCGAAG	11	67	56	G	67	68	1		68	68	0	AG	68	70	2	G	70	71	1
759	caatgcttctcgtgatacccagatcatatgaaacagcatgactttttcaagagtgccatgcccgaaggTGATACC	1	caatgcttctcgtgatacccag tatgaaacagcatgactttt atca t TAGT c CCA ggaagcccgtaccgtgagaa	CAATGCTTCTCGTGATACCCAG	0	22	22	ATCA	22	26	4		26	26	0	TATGAAACAGCATGACTTTTTCAAGAGTGCCATGCCCGAAGG	26	68	42		68	68	0		68	68	0	TGAT	68	72	4	ACC	72	75	3
760	caatgcttctcgtgatacccagatcatatgaaacagcatgactttttcaagagtgccatgcccgaaggCCATGGCACTCTTGAAAAAGTCA	1	caatgcttctcgtgatacccagatcatatgaaacagca c tgactttttcaagagtgccatg-cc g ACTGAAAAAGTTCTCACGGTACCgg a a	CAATGCTTCTCGTGATACCCAGATCATATGAAACAGCA	0	38	38	TGACTTTTTCAAGAGTGCCATG	38	60	22	CC	60	62	2	CGAA	62	66	4	GG	66	68	2	C	68	69	1	CATGGCACTCTTGAAAAAGTCA	69	91	22		91	91	0
761	caatgcttctcgtgatacccagatcatatgaaacagcatgactttttcaagagtgccatgcccgaaggGGCATGGCACCT	1	caatgcttctcgtgatacccagatcatatgaaacagcatgactttttcaaga g gtgccatgccc a CACGGTACGGg a TC g	CAATGCTTCTCGTGATACCCAGATCATATGAAACAGCATGACTTTTTCAAGA	0	52	52	GTGCCATGCC	52	62	10	C	62	63	1	GAAG	63	67	4	G	67	68	1		68	68	0	GGCATGGCAC	68	78	10	CT	78	80	2
762	caatgcttctcgtgatacccagatcatatgaaacagcatgactttttcaagagtgccatgcccgaaggGGCATGGCACTCTTGAAAC	1	caatgcttctcgtgatacccagatcatatgaaacagcatgactt g tttcaagagtgccatgccc a AAAGTTCTCACGGTACGGg a C g	CAATGCTTCTCGTGATACCCAGATCATATGAAACAGCATGACTT	0	44	44	TTTCAAGAGTGCCATGCC	44	62	18	C	62	63	1	GAAG	63	67	4	G	67	68	1		68	68	0	GGCATGGCACTCTTGAAA	68	86	18	C	86	87	1
763	caatgcttctcgtgatacccagatcatatgaaacagcatgactttttcaagagtgccatgcccgaaggGCTCGTACCCTTCGGGCATGA	1	caatgcttctcgtgatacccagatcatatgaaacagcatgactttttcaagagtgc GCT catgcccgaagg C GTACGGGCTTCC G A CAT	CAATGCTTCTCGTGATACCCAGATCATATGAAACAGCATGACTTTTTCAAGAGTGC	0	56	56	CATGCCCGAAGG	56	68	12		68	68	0		68	68	0		68	68	0	GCTCGTAC	68	76	8	CCTTCGGGCATG	76	88	12	A	88	89	1
764	caatgcttctcgtgatacccagatcatatgaaacagcatgactttttcaagagtgccatgcccgaaggGATGGCACTCTTGAAAAAGTCATGCTGT	1	caatgcttctcgtgatacccagatcatatgaa gccc acagcatgactttttcaagagtgccat g TGTCGTACTGAAAAAGTTCTCACGGTA a Ggga	CAATGCTTCTCGTGATACCCAGATCATATGAA	0	32	32	ACAGCATGACTTTTTCAAGAGTGCCAT	32	59	27		59	59	0	GCCCGAAGG	59	68	9		68	68	0	G	68	69	1	ATGGCACTCTTGAAAAAGTCATGCTGT	69	96	27		96	96	0
765	caatgcttctcgtgatacccagatcatatgaaacagcatgactttttcaagagtgccatgcccgaaggGCGTGGCAC	1	caatgcttctcgtgatacccagatcatatgaaacagcatgactttttcaagagtgccat g gccc a CGgga CACGGTG	CAATGCTTCTCGTGATACCCAGATCATATGAAACAGCATGACTTTTTCAAGAGTGCCAT	0	59	59	GC	59	61	2	CC	61	63	2	GAA	63	66	3	GG	66	68	2		68	68	0	GC	68	70	2	GTGGCAC	70	77	7
766	caatgcttctcgtgatacccagatcatatgaaacagcatgactttttcaagagtgccatgcccgaaggTCATGCTGTTTCATATCGCAC	1	caatgcttctcgtgatacccagatc tttttcaagagt atatgaaacagcatgac g TATACTTTGTCGTACTggaagcccgtacc CACGC	CAATGCTTCTCGTGATACCCAGATC	0	25	25	ATATGAAACAGCATGA	25	41	16	C	41	42	1	TTTTTCAAGAGTGCCATGCCCGAAG	42	67	25	G	67	68	1		68	68	0	TCATGCTGTTTCATAT	68	84	16	CGCAC	84	89	5
767	caatgcttctcgtgatacccagatcatatgaaacagcatgactttttcaagagtgccatgcccgaaggCACTCTTGAAAA	1	caatgcttctcgtgatacccagatcatatgaaacagcatgact atgc ttttcaagagtgcc c AAAAGTTCTCACggaagc	CAATGCTTCTCGTGATACCCAGATCATATGAAACAGCATGACT	0	43	43	TTTTCAAGAGTG	43	55	12	CC	55	57	2	ATGCCCGAA	57	66	9	GG	66	68	2		68	68	0	CACTCTTGAAAA	68	80	12		80	80	0
768	caatgcttctcgtgatacccagatcatatgaaacagcatgactttttcaagagtgccatgcccgaaggCATGGCACTCATTGAAAAAGTCATGC	1	caatgcttctcgtgatacccagatcatatgaaacagcatgactttttcaa c gagtgccatgcc g CTCACGGTACgg a CGTACTGAAAAAGTTA a	CAATGCTTCTCGTGATACCCAGATCATATGAAACAGCATGACTTTTTCAA	0	50	50	GAGTGCCATG	50	60	10	CC	60	62	2	CGAA	62	66	4	GG	66	68	2		68	68	0	CATGGCACTC	68	78	10	ATTGAAAAAGTCATGC	78	94	16
769	caatgcttctcgtgatacccagatcatatgaaacagcatgactttttcaagagtgccatgcccgaaggGATA	1	caatgcttctcgtgatacccagatcatatgaaacagcatgactttttcaagagtgcc gccc at g TA a A Ggga	CAATGCTTCTCGTGATACCCAGATCATATGAAACAGCATGACTTTTTCAAGAGTGCC	0	57	57	AT	57	59	2		59	59	0	GCCCGAAGG	59	68	9		68	68	0	G	68	69	1	AT	69	71	2	A	71	72	1
770	caatgcttctcgtgatacccagatcatatgaaacagcatgactttttcaagagtgccatgcccgaaggGCATGGCACTCATT	1	caatgcttctcgtgatacccagatcatatgaaacagcatgactttttcaa g gagtgccatgccc a CTCACGGTACGgga TTA	CAATGCTTCTCGTGATACCCAGATCATATGAAACAGCATGACTTTTTCAA	0	50	50	GAGTGCCATGC	50	61	11	CC	61	63	2	GAA	63	66	3	GG	66	68	2		68	68	0	GCATGGCACTC	68	79	11	ATT	79	82	3
771	caatgcttctcgtgatacccagatcatatgaaacagcatgactttttcaagagtgccatgcccgaaggCCATGCTGTTTCATATGATCC	1	caatgcttctcgtgataccca actttttcaagagt gatcatatgaaacagcatg g CTAGTATACTTTGTCGTACCggaagcccgtacc C	CAATGCTTCTCGTGATACCCA	0	21	21	GATCATATGAAACAGCATG	21	40	19		40	40	0	ACTTTTTCAAGAGTGCCATGCCCGAAGG	40	68	28		68	68	0	C	68	69	1	CATGCTGTTTCATATGATC	69	88	19	C	88	89	1
772	caatgcttctcgtgatacccagatcatatgaaacagcatgactttttcaagagtgccatgcccgaaggCATGGCACTCTTCGGGCATGGC	1	caatgcttctcgtgatacccagatcatatgaaacagcatgactttttc c aagagtgccatgcc g TTCTCACGGTACgg a CGGTACGGGC a	CAATGCTTCTCGTGATACCCAGATCATATGAAACAGCATGACTTTTTC	0	48	48	AAGAGTGCCATG	48	60	12	CC	60	62	2	CGAA	62	66	4	GG	66	68	2		68	68	0	CATGGCACTCTT	68	80	12	CGGGCATGGC	80	90	10
773	caatgcttctcgtgatacccagatcatatgaaacagcatgactttttcaagagtgccatgcccgaaggGTCTCACGAGAAGCATT	1	c tacccagatcatatgaaacagcatgac aatgcttctcgtga t TTACGAAGAGCACT t CTGggaagcccgtaccgtgagaacttt	C	0	1	1	AATGCTTCTCGTGA	1	15	14		15	15	0	TACCCAGATCATATGAAACAGCATGACTTTTTCAAGAGTGCCATGCCCGAAGG	15	68	53		68	68	0	GTC	68	71	3	TCACGAGAAGCATT	71	85	14		85	85	0
774	caatgcttctcgtgatacccagatcatatgaaacagcatgactttttcaagagtgccatgcccgaaggCCATGCTGTTTAA	1	caatgcttctcgtgatacccagatcatatg actttttcaagagt aaacagcatg g TTTGTCGTACCggaagcccgtacc AA	CAATGCTTCTCGTGATACCCAGATCATATG	0	30	30	AAACAGCATG	30	40	10		40	40	0	ACTTTTTCAAGAGTGCCATGCCCGAAGG	40	68	28		68	68	0	C	68	69	1	CATGCTGTTT	69	79	10	AA	79	81	2
775	caatgcttctcgtgatacccagatcatatgaaacagcatgactttttcaagagtgccatgcccgaaggTCATGCTGTTTCAGC	1	caatgcttctcgtgatacccagatcata tttttcaagagt tgaaacagcatgac g ACTTTGTCGTACTggaagcccgtacc CG	CAATGCTTCTCGTGATACCCAGATCATA	0	28	28	TGAAACAGCATGA	28	41	13	C	41	42	1	TTTTTCAAGAGTGCCATGCCCGAAG	42	67	25	G	67	68	1		68	68	0	TCATGCTGTTTCA	68	81	13	GC	81	83	2
776	caatgcttctcgtgatacccagatcatatgaaacagcatgactttttcaagagtgccatgcccgaaggCATTGAAA	1	ttctcgtgatacccagatcatatgaaacag caatgc c GTTACggaagcccgtaccgtgagaactttttcagta AAA		0	0	0	CAATG	0	5	5	C	5	6	1	TTCTCGTGATACCCAGATCATATGAAACAGCATGACTTTTTCAAGAGTGCCATGCCCGAAG	6	67	61	G	67	68	1		68	68	0	CATTG	68	73	5	AAA	73	76	3
777	caatgcttctcgtgatacccagatcatatgaaacagcatgactttttcaagagtgccatgcccgaaggGCTGGCACTCTTGAAAAGTCATGCTGTT	1	caatgcttctcgtgatacccagatcatatgaaacagcatgact tgccc ttttcaagagtgcca g AAAAGTTCTCACGGT a TTGTCGTACTG CGgga	CAATGCTTCTCGTGATACCCAGATCATATGAAACAGCATGACT	0	43	43	TTTTCAAGAGTGCCA	43	58	15		58	58	0	TGCCCGAAGG	58	68	10		68	68	0	GC	68	70	2	TGGCACTCTTGAAAA	70	85	15	GTCATGCTGTT	85	96	11
778	caatgcttctcgtgatacccagatcatatgaaacagcatgactttttcaagagtgccatgcccgaaggCACTCAT	1	caatgcttctcgtgatacccagatcatatgaaacagcatgactttttcaa atgc gagtgcc c CTCACggaagc TA	CAATGCTTCTCGTGATACCCAGATCATATGAAACAGCATGACTTTTTCAA	0	50	50	GAGTG	50	55	5	CC	55	57	2	ATGCCCGAA	57	66	9	GG	66	68	2		68	68	0	CACTC	68	73	5	AT	73	75	2
779	caatgcttctcgtgatacccagatcatatgaaacagcatgactttttcaagagtgccatgcccgaaggGGCATGGCACTCTTGAAT	1	caatgcttctcgtgatacccagatcatatgaaacagcatgacttt g ttcaagagtgccatgccc a AAGTTCTCACGGTACGGg a T g	CAATGCTTCTCGTGATACCCAGATCATATGAAACAGCATGACTTT	0	45	45	TTCAAGAGTGCCATGCC	45	62	17	C	62	63	1	GAAG	63	67	4	G	67	68	1		68	68	0	GGCATGGCACTCTTGAA	68	85	17	T	85	86	1
780	caatgcttctcgtgatacccagatcatatgaaacagcatgactttttcaagagtgccatgcccgaaggCATGCTGTGTCATATGAAACAGCATGCCTTC	1	caatgcttctcgtgatacccagatcatatgaa actttttcaagag acagcatg t TGTCGTAC g CTTCCGTACGACAAAGTATACTG ggaagcccgtacc	CAATGCTTCTCGTGATACCCAGATCATATGAA	0	32	32	ACAGCATG	32	40	8		40	40	0	ACTTTTTCAAGAGTGCCATGCCCGAAGG	40	68	28		68	68	0		68	68	0	CATGCTGT	68	76	8	GTCATATGAAACAGCATGCCTTC	76	99	23
781	caatgcttctcgtgatacccagatcatatgaaacagcatgactttttcaagagtgccatgcccgaaggGGCATGGCACTCTTGAAAAAGTCA	1	caatgcttctcgtgatacccagatcatatgaaacagca g tgactttttcaagagtgccatgccc a ACTGAAAAAGTTCTCACGGTACGGg a g	CAATGCTTCTCGTGATACCCAGATCATATGAAACAGCA	0	38	38	TGACTTTTTCAAGAGTGCCATGCC	38	62	24	C	62	63	1	GAAG	63	67	4	G	67	68	1		68	68	0	GGCATGGCACTCTTGAAAAAGTCA	68	92	24		92	92	0
782	caatgcttctcgtgatacccagatcatatgaaacagcatgactttttcaagagtgccatgcccgaaggCCATGTTGTTTCATATGATCTGGGTAGC	1	caatgcttctcgtga gcatgactttttcaagagt tacccagatcatatgaaaca g ATGGGTCTAGTATACTTTGTTGTACCggaagcccgtacc CG	CAATGCTTCTCGTGA	0	15	15	TACCCAGATCATATGAAACA	15	35	20		35	35	0	GCATGACTTTTTCAAGAGTGCCATGCCCGAAGG	35	68	33		68	68	0	CCATGT	68	74	6	TGTTTCATATGATCTGGGTA	74	94	20	GC	94	96	2
783	caatgcttctcgtgatacccagatcatatgaaacagcatgactttttcaagagtgccatgcccgaaggGAAGCATTGAA	1	tcgtgatacccagatcatatgaaacagca caatgcttc t GTTACGAAGggaagcccgtaccgtgagaactttttcag AA		0	0	0	CAATGCTTC	0	9	9		9	9	0	TCGTGATACCCAGATCATATGAAACAGCATGACTTTTTCAAGAGTGCCATGCCCGAAGG	9	68	59		68	68	0		68	68	0	GAAGCATTG	68	77	9	AA	77	79	2
784	caatgcttctcgtgatacccagatcatatgaaacagcatgactttttcaagagtgccatgcccgaaggGCATGGCACTCTTGAAGAA	1	caatgcttctcgtgatacccagatcatatgaaacagcatgacttt g ttcaagagtgccatgccc a AAGTTCTCACGGTACGgga AAG	CAATGCTTCTCGTGATACCCAGATCATATGAAACAGCATGACTTT	0	45	45	TTCAAGAGTGCCATGC	45	61	16	CC	61	63	2	GAA	63	66	3	GG	66	68	2		68	68	0	GCATGGCACTCTTGAA	68	84	16	GAA	84	87	3
785	caatgcttctcgtgatacccagatcatatgaaacagcatgactttttcaagagtgccatgcccgaaggCATTGAGGGCATGGCACTCT	1	ttctcgtgatacccagatcatatgaaacag caatgc c GTTACggaagcccgtaccgtgagaactttttcagta TCTCACGGTACGGGA		0	0	0	CAATG	0	5	5	C	5	6	1	TTCTCGTGATACCCAGATCATATGAAACAGCATGACTTTTTCAAGAGTGCCATGCCCGAAG	6	67	61	G	67	68	1		68	68	0	CATTG	68	73	5	AGGGCATGGCACTCT	73	88	15
786	caatgcttctcgtgatacccagatcatatgaaacagcatgactttttcaagagtgccatgcccgaaggTCATGCTGTTTCATATGATCTA	1	caatgcttctcgtgataccc tttttcaagagt agatcatatgaaacagcatgac g TCTAGTATACTTTGTCGTACTggaagcccgtacc A	CAATGCTTCTCGTGATACCC	0	20	20	AGATCATATGAAACAGCATGA	20	41	21	C	41	42	1	TTTTTCAAGAGTGCCATGCCCGAAG	42	67	25	G	67	68	1		68	68	0	TCATGCTGTTTCATATGATCT	68	89	21	A	89	90	1
787	caatgcttctcgtgatacccagatcatatgaaacagcatgactttttcaagagtgccatgcccgaaggGCATGGCACTCTTGC	1	caatgcttctcgtgatacccagatcatatgaaacagcatgacttttt g caagagtgccatgccc a GTTCTCACGGTACGgga C	CAATGCTTCTCGTGATACCCAGATCATATGAAACAGCATGACTTTTT	0	47	47	CAAGAGTGCCATGC	47	61	14	CC	61	63	2	GAA	63	66	3	GG	66	68	2		68	68	0	GCATGGCACTCTTG	68	82	14	C	82	83	1
788	caatgcttctcgtgatacccagatcatatgaaacagcatgactttttcaagagtgccatgcccgaaggGCATGGCAACTCT	1	caatgcttctcgtgatacccagatcatatgaaacagcatgactttttcaagag g tgccatgccc a ACGGTACGgga TCTCA	CAATGCTTCTCGTGATACCCAGATCATATGAAACAGCATGACTTTTTCAAGAG	0	53	53	TGCCATGC	53	61	8	CC	61	63	2	GAA	63	66	3	GG	66	68	2		68	68	0	GCATGGCA	68	76	8	ACTCT	76	81	5
789	caatgcttctcgtgatacccagatcatatgaaacagcatgactttttcaagagtgccatgcccgaaggTCATGCTGTTTCATGACCTTCGGGCATGAAACAGC	1	caatgcttctcgtgatacccagatcat tttttcaagagt atgaaacagcatgac g TACTTTGTCGTACTggaagcccgtacc CGACAAAGTACGGGCTTCCAG	CAATGCTTCTCGTGATACCCAGATCAT	0	27	27	ATGAAACAGCATGA	27	41	14	C	41	42	1	TTTTTCAAGAGTGCCATGCCCGAAG	42	67	25	G	67	68	1		68	68	0	TCATGCTGTTTCAT	68	82	14	GACCTTCGGGCATGAAACAGC	82	103	21
790	caatgcttctcgtgatacccagatcatatgaaacagcatgactttttcaagagtgccatgcccgaaggGGCATGGCACTCTTGAAAAGAC	1	caatgcttctcgtgatacccagatcatatgaaacagcatgact g ttttcaagagtgccatgccc a AAAAGTTCTCACGGTACGGg a CAG g	CAATGCTTCTCGTGATACCCAGATCATATGAAACAGCATGACT	0	43	43	TTTTCAAGAGTGCCATGCC	43	62	19	C	62	63	1	GAAG	63	67	4	G	67	68	1		68	68	0	GGCATGGCACTCTTGAAAA	68	87	19	GAC	87	90	3
791	caatgcttctcgtgatacccagatcatatgaaacagcatgactttttcaagagtgccatgcccgaaggTCATGCTGTTTCATATGTCCT	1	caatgcttctcgtgatacccagat tttttcaagagt catatgaaacagcatgac g GTATACTTTGTCGTACTggaagcccgtacc TCCT	CAATGCTTCTCGTGATACCCAGAT	0	24	24	CATATGAAACAGCATGA	24	41	17	C	41	42	1	TTTTTCAAGAGTGCCATGCCCGAAG	42	67	25	G	67	68	1		68	68	0	TCATGCTGTTTCATATG	68	85	17	TCCT	85	89	4
792	caatgcttctcgtgatacccagatcatatgaaacagcatgactttttcaagagtgccatgcccgaaggCATGGCACTCTTGAAT	1	caatgcttctcgtgatacccagatcatatgaaacagcatgacttt c ttcaagagtgccatgcc g AAGTTCTCACGGTACgg a T a	CAATGCTTCTCGTGATACCCAGATCATATGAAACAGCATGACTTT	0	45	45	TTCAAGAGTGCCATG	45	60	15	CC	60	62	2	CGAA	62	66	4	GG	66	68	2		68	68	0	CATGGCACTCTTGAA	68	83	15	T	83	84	1
793	caatgcttctcgtgatacccagatcatatgaaacagcatgactttttcaagagtgccatgcccgaaggGCATGGCACTCTTGAAAAAGTCATGCTGTT	1	caatgcttctcgtgatacccagatcatatga g aacagcatgactttttcaagagtgccatgccc a TTGTCGTACTGAAAAAGTTCTCACGGTACGgga	CAATGCTTCTCGTGATACCCAGATCATATGA	0	31	31	AACAGCATGACTTTTTCAAGAGTGCCATGC	31	61	30	CC	61	63	2	GAA	63	66	3	GG	66	68	2		68	68	0	GCATGGCACTCTTGAAAAAGTCATGCTGTT	68	98	30		98	98	0
794	caatgcttctcgtgatacccagatcatatgaaacagcatgactttttcaagagtgccatgcccgaaggAATGCC	1	caatgcttctcgtgatacccagatcatatgaaacagcatgactttttcaagagtgc gccc cat g GTA a CC Agga	CAATGCTTCTCGTGATACCCAGATCATATGAAACAGCATGACTTTTTCAAGAGTGC	0	56	56	CAT	56	59	3		59	59	0	GCCCGAAGG	59	68	9		68	68	0	A	68	69	1	ATG	69	72	3	CC	72	74	2
795	caatgcttctcgtgatacccagatcatatgaaacagcatgactttttcaagagtgccatgcccgaaggCACTCTTGAAAAAGC	1	caatgcttctcgtgatacccagatcatatgaaacagcatga atgc ctttttcaagagtgcc c GAAAAAGTTCTCACggaagc C	CAATGCTTCTCGTGATACCCAGATCATATGAAACAGCATGA	0	41	41	CTTTTTCAAGAGTG	41	55	14	CC	55	57	2	ATGCCCGAA	57	66	9	GG	66	68	2		68	68	0	CACTCTTGAAAAAG	68	82	14	C	82	83	1
796	caatgcttctcgtgatacccagatcatatgaaacagcatgactttttcaagagtgccatgcccgaaggGCATGGCACTCTTGAGAAAGTCATGC	1	caatgcttctcgtgatacccagatcatatgaaacagcatgactttt g tcaagagtgccatgccc a AGTTCTCACGGTACGgga CGTACTGAAAG	CAATGCTTCTCGTGATACCCAGATCATATGAAACAGCATGACTTTT	0	46	46	TCAAGAGTGCCATGC	46	61	15	CC	61	63	2	GAA	63	66	3	GG	66	68	2		68	68	0	GCATGGCACTCTTGA	68	83	15	GAAAGTCATGC	83	94	11
797	caatgcttctcgtgatacccagatcatatgaaacagcatgactttttcaagagtgccatgcccgaaggTCATGCTGTTTCATATGATCTGGGTAT	1	caatgcttctcgtg tttttcaagagt atacccagatcatatgaaacagcatgac g TATGGGTCTAGTATACTTTGTCGTACTggaagcccgtacc	CAATGCTTCTCGTG	0	14	14	ATACCCAGATCATATGAAACAGCATGA	14	41	27	C	41	42	1	TTTTTCAAGAGTGCCATGCCCGAAG	42	67	25	G	67	68	1		68	68	0	TCATGCTGTTTCATATGATCTGGGTAT	68	95	27		95	95	0
798	caatgcttctcgtgatacccagatcatatgaaacagcatgactttttcaagagtgccatgcccgaaggGCATGGCACTCTTGACAAA	1	caatgcttctcgtgatacccagatcatatgaaacagcatgactttt g tcaagagtgccatgccc a AGTTCTCACGGTACGgga AAAC	CAATGCTTCTCGTGATACCCAGATCATATGAAACAGCATGACTTTT	0	46	46	TCAAGAGTGCCATGC	46	61	15	CC	61	63	2	GAA	63	66	3	GG	66	68	2		68	68	0	GCATGGCACTCTTGA	68	83	15	CAAA	83	87	4
799	caatgcttctcgtgatacccagatcatatgaaacagcatgactttttcaagagtgccatgcccgaaggGCGTGGCACTCTTGAAAAA	1	caatgcttctcgtgatacccagatcatatgaaacagcatgac tgcccg tttttcaagagtgcca a AAAAAGTTCTCACGGTGCGgga	CAATGCTTCTCGTGATACCCAGATCATATGAAACAGCATGAC	0	42	42	TTTTTCAAGAGTGCCA	42	58	16		58	58	0	TGCCCGAAGG	58	68	10		68	68	0	GCG	68	71	3	TGGCACTCTTGAAAAA	71	87	16		87	87	0
800	caatgcttctcgtgatacccagatcatatgaaacagcatgactttttcaagagtgccatgcccgaaggGTCATGCTGTCTT	1	caatgcttctcgtgatacccagatcatatgaa tttttcaagagt acagcatgac g TGTCGTACTG c TTC ggaagcccgtac	CAATGCTTCTCGTGATACCCAGATCATATGAA	0	32	32	ACAGCATGAC	32	42	10		42	42	0	TTTTTCAAGAGTGCCATGCCCGAAGG	42	68	26		68	68	0		68	68	0	GTCATGCTGT	68	78	10	CTT	78	81	3
801	caatgcttctcgtgatacccagatcatatgaaacagcatgactttttcaagagtgccatgcccgaaggCCATGCTGTTTCATATGATCTGGGTCC	1	caatgcttctcgtgat actttttcaagagt acccagatcatatgaaacagcatg g TGGGTCTAGTATACTTTGTCGTACCggaagcccgtacc CC	CAATGCTTCTCGTGAT	0	16	16	ACCCAGATCATATGAAACAGCATG	16	40	24		40	40	0	ACTTTTTCAAGAGTGCCATGCCCGAAGG	40	68	28		68	68	0	C	68	69	1	CATGCTGTTTCATATGATCTGGGT	69	93	24	CC	93	95	2
802	caatgcttctcgtgatacccagatcatatgaaacagcatgactttttcaagagtgccatgcccgaaggAACAGCTC	1	caatgcttctcgtgatacccagatcatatgaaacagcatgactttttcaaga gccatgc gt c CAAggaagc CTCGA	CAATGCTTCTCGTGATACCCAGATCATATGAAACAGCATGACTTTTTCAAGA	0	52	52	GT	52	54	2		54	54	0	GCCATGCCCGAAGG	54	68	14		68	68	0	A	68	69	1	AC	69	71	2	AGCTC	71	76	5
803	caatgcttctcgtgatacccagatcatatgaaacagcatgactttttcaagagtgccatgcccgaaggCCACTCTTGAAAAAGTCCTTCGGGCAT	1	caatgcttctcgtgatacccagatcatatgaaacagcat atgc gactttttcaagagtg-cc c CTGAAAAAGTTCTCACCggaagc TACGGGCTTC	CAATGCTTCTCGTGATACCCAGATCATATGAAACAGCAT	0	39	39	GACTTTTTCAAGAGTG	39	55	16	CC	55	57	2	ATGCCCGAA	57	66	9	GG	66	68	2	C	68	69	1	CACTCTTGAAAAAGTC	69	85	16	CTTCGGGCAT	85	95	10
804	caatgcttctcgtgatacccagatcatatgaaacagcatgactttttcaagagtgccatgcccgaaggGCATGGCACTCTTGAAAAGTCATGCTGT	1	caatgcttctcgtgatacccagatcatatgaaacagcatgact g ttttcaagagtgccatgccc a AAAAGTTCTCACGGTACGgga TGTCGTACTG	CAATGCTTCTCGTGATACCCAGATCATATGAAACAGCATGACT	0	43	43	TTTTCAAGAGTGCCATGC	43	61	18	CC	61	63	2	GAA	63	66	3	GG	66	68	2		68	68	0	GCATGGCACTCTTGAAAA	68	86	18	GTCATGCTGT	86	96	10
805	caatgcttctcgtgatacccagatcatatgaaacagcatgactttttcaagagtgccatgcccgaaggTCATGCTGTTTCG	1	caatgcttctcgtgatacccagatcatat tttttcaagagt gaaacagcatgac g CTTTGTCGTACTggaagcccgtacc G	CAATGCTTCTCGTGATACCCAGATCATAT	0	29	29	GAAACAGCATGA	29	41	12	C	41	42	1	TTTTTCAAGAGTGCCATGCCCGAAG	42	67	25	G	67	68	1		68	68	0	TCATGCTGTTTC	68	80	12	G	80	81	1
806	caatgcttctcgtgatacccagatcatatgaaacagcatgactttttcaagagtgccatgcccgaaggCATGGCACTCAT	1	caatgcttctcgtgatacccagatcatatgaaacagcatgactttttcaa c gagtgccatgcc g CTCACGGTACgg a TA a	CAATGCTTCTCGTGATACCCAGATCATATGAAACAGCATGACTTTTTCAA	0	50	50	GAGTGCCATG	50	60	10	CC	60	62	2	CGAA	62	66	4	GG	66	68	2		68	68	0	CATGGCACTC	68	78	10	AT	78	80	2
807	caatgcttctcgtgatacccagatcatatgaaacagcatgactttttcaagagtgccatgcccgaaggGGCATGGCACTCTATGC	1	caatgcttctcgtgatacccagatcatatgaaacagcatgactttttca g agagtgccatgccc a TCTCACGGTACGGg a CGTA g	CAATGCTTCTCGTGATACCCAGATCATATGAAACAGCATGACTTTTTCA	0	49	49	AGAGTGCCATGCC	49	62	13	C	62	63	1	GAAG	63	67	4	G	67	68	1		68	68	0	GGCATGGCACTCT	68	81	13	ATGC	81	85	4
808	caatgcttctcgtgatacccagatcatatgaaacagcatgactttttcaagagtgccatgcccgaaggGTATCACGAGAAGCATTGAC	1	agatcatatgaaacagcatgac caatgcttctcgtgataccc t GTTACGAAGAGCACTATGgg t CA aagcccgtaccgtgagaacttt		0	0	0	CAATGCTTCTCGTGATAC	0	18	18	CC	18	20	2	AGATCATATGAAACAGCATGACTTTTTCAAGAGTGCCATGCCCGAA	20	66	46	GG	66	68	2		68	68	0	GTATCACGAGAAGCATTG	68	86	18	AC	86	88	2
809	caatgcttctcgtgatacccagatcatatgaaacagcatgactttttcaagagtgccatgcccgaaggGCAGCAT	1	caatgcttctcgtgatacccagatcatatgaaacagcatgactttttcaagagtgcca g tgccc a ACGgga TACG	CAATGCTTCTCGTGATACCCAGATCATATGAAACAGCATGACTTTTTCAAGAGTGCCA	0	58	58	TGC	58	61	3	CC	61	63	2	GAA	63	66	3	GG	66	68	2		68	68	0	GCA	68	71	3	GCAT	71	75	4
810	caatgcttctcgtgatacccagatcatatgaaacagcatgactttttcaagagtgccatgcccgaaggTCATGCTGTTCATG	1	caatgcttctcgtgatacccagatcatatga tttttcaagagt aacagcatgac g TTGTCGTACTggaagcccgtacc GTAC	CAATGCTTCTCGTGATACCCAGATCATATGA	0	31	31	AACAGCATGA	31	41	10	C	41	42	1	TTTTTCAAGAGTGCCATGCCCGAAG	42	67	25	G	67	68	1		68	68	0	TCATGCTGTT	68	78	10	CATG	78	82	4
811	caatgcttctcgtgatacccagatcatatgaaacagcatgactttttcaagagtgccatgcccgaaggGGCATGGCACTCTTGAAGA	1	caatgcttctcgtgatacccagatcatatgaaacagcatgacttt g ttcaagagtgccatgccc a AAGTTCTCACGGTACGGg a AG g	CAATGCTTCTCGTGATACCCAGATCATATGAAACAGCATGACTTT	0	45	45	TTCAAGAGTGCCATGCC	45	62	17	C	62	63	1	GAAG	63	67	4	G	67	68	1		68	68	0	GGCATGGCACTCTTGAA	68	85	17	GA	85	87	2
812	caatgcttctcgtgatacccagatcatatgaaacagcatgactttttcaagagtgccatgcccgaaggACCCAGATCATATGAAACAGC	1	caatgcttctcgtgatacccagatcatatgaaacagcatgactttttcaagagtgccatgcccgaag g A CGACAAAGTATACTAGACCC	CAATGCTTCTCGTGATACCCAGATCATATGAAACAGCATGACTTTTTCAAGAGTGCCATGCCCGAAGG	0	68	68		68	68	0		68	68	0		68	68	0		68	68	0		89	89	0		89	89	0		89	89	0
813	caatgcttctcgtgatacccagatcatatgaaacagcatgactttttcaagagtgccatgcccgaaggCATGGA	1	caatgcttctcgtgatacccagatcatatgaaacagcatgactttttcaagagtg c ccatgcc g GGTACgg a A a	CAATGCTTCTCGTGATACCCAGATCATATGAAACAGCATGACTTTTTCAAGAGTG	0	55	55	CCATG	55	60	5	CC	60	62	2	CGAA	62	66	4	GG	66	68	2		68	68	0	CATGG	68	73	5	A	73	74	1
814	caatgcttctcgtgatacccagatcatatgaaacagcatgactttttcaagagtgccatgcccgaaggGCATGGCACTCCGGGTGCCATGCCCTTC	1	caatgcttctcgtgatacccagatcatatgaaacagcatgactttttcaa g gagtgccatgccc a CTCACGGTACGgga CTTCCCGTACCGTGGGC	CAATGCTTCTCGTGATACCCAGATCATATGAAACAGCATGACTTTTTCAA	0	50	50	GAGTGCCATGC	50	61	11	CC	61	63	2	GAA	63	66	3	GG	66	68	2		68	68	0	GCATGGCACTC	68	79	11	CGGGTGCCATGCCCTTC	79	96	17
815	caatgcttctcgtgatacccagatcatatgaaacagcatgactttttcaagagtgccatgcccgaaggCCATGCTGTTTCATATGATCTGGA	1	caatgcttctcgtgatac actttttcaagagt ccagatcatatgaaacagcatg g GGTCTAGTATACTTTGTCGTACCggaagcccgtacc A	CAATGCTTCTCGTGATAC	0	18	18	CCAGATCATATGAAACAGCATG	18	40	22		40	40	0	ACTTTTTCAAGAGTGCCATGCCCGAAGG	40	68	28		68	68	0	C	68	69	1	CATGCTGTTTCATATGATCTGG	69	91	22	A	91	92	1
816	caatgcttctcgtgatacccagatcatatgaaacagcatgactttttcaagagtgccatgcccgaaggGTCATGCTGTTTCATATGAT	1	caatgcttctcgtgatacccag tttttcaagagt atcatatgaaacagcatgac g TAGTATACTTTGTCGTACTG c ggaagcccgtac	CAATGCTTCTCGTGATACCCAG	0	22	22	ATCATATGAAACAGCATGAC	22	42	20		42	42	0	TTTTTCAAGAGTGCCATGCCCGAAGG	42	68	26		68	68	0		68	68	0	GTCATGCTGTTTCATATGAT	68	88	20		88	88	0
817	caatgcttctcgtgatacccagatcatatgaaacagcatgactttttcaagagtgccatgcccgaaggGGCATGGCACACT	1	caatgcttctcgtgatacccagatcatatgaaacagcatgactttttcaaga g gtgccatgccc a CACGGTACGGg a TCA g	CAATGCTTCTCGTGATACCCAGATCATATGAAACAGCATGACTTTTTCAAGA	0	52	52	GTGCCATGCC	52	62	10	C	62	63	1	GAAG	63	67	4	G	67	68	1		68	68	0	GGCATGGCAC	68	78	10	ACT	78	81	3
818	caatgcttctcgtgatacccagatcatatgaaacagcatgactttttcaagagtgccatgcccgaaggGCTCAT	1	caatgcttctcgtgatacccagatcatatgaaacagcatgactttttcaagagtgccat g gccc a CGgga TACT	CAATGCTTCTCGTGATACCCAGATCATATGAAACAGCATGACTTTTTCAAGAGTGCCAT	0	59	59	GC	59	61	2	CC	61	63	2	GAA	63	66	3	GG	66	68	2		68	68	0	GC	68	70	2	TCAT	70	74	4
819	caatgcttctcgtgatacccagatcatatgaaacagcatgactttttcaagagtgccatgcccgaaggGAAACAGC	1	caatgcttctcgtgatacccagatcatatgaaacagcatgactt aagagtgcc tttc a AAAG t CGAC ggaagcccg	CAATGCTTCTCGTGATACCCAGATCATATGAAACAGCATGACTT	0	44	44	TTTC	44	48	4		48	48	0	AAGAGTGCCATGCCCGAAGG	48	68	20		68	68	0		68	68	0	GAAA	68	72	4	CAGC	72	76	4
820	caatgcttctcgtgatacccagatcatatgaaacagcatgactttttcaagagtgccatgcccgaaggGCATGGCACTCTTGAAGAGT	1	caatgcttctcgtgatacccagatcatatgaaacagcatgacttt g ttcaagagtgccatgccc a AAGTTCTCACGGTACGgga TGAG	CAATGCTTCTCGTGATACCCAGATCATATGAAACAGCATGACTTT	0	45	45	TTCAAGAGTGCCATGC	45	61	16	CC	61	63	2	GAA	63	66	3	GG	66	68	2		68	68	0	GCATGGCACTCTTGAA	68	84	16	GAGT	84	88	4
821	caatgcttctcgtgatacccagatcatatgaaacagcatgactttttcaagagtgccatgcccgaaggTCATGCTGTTTCATGTAT	1	caatgcttctcgtgatacccagatcat tttttcaagagt atgaaacagcatgac g TACTTTGTCGTACTggaagcccgtacc TATG	CAATGCTTCTCGTGATACCCAGATCAT	0	27	27	ATGAAACAGCATGA	27	41	14	C	41	42	1	TTTTTCAAGAGTGCCATGCCCGAAG	42	67	25	G	67	68	1		68	68	0	TCATGCTGTTTCAT	68	82	14	GTAT	82	86	4
822	caatgcttctcgtgatacccagatcatatgaaacagcatgactttttcaagagtgccatgcccgaaggGGGTATCACGAGATACCCCCTTCG	1	caatgct agatcatatgaaacagcatgact tctcgtgataccc t AGAGCACTATGGG t GCTTCCCCCAT ggaagcccgtaccgtgagaactt	CAATGCT	0	7	7	TCTCGTGATACCC	7	20	13		20	20	0	AGATCATATGAAACAGCATGACTTTTTCAAGAGTGCCATGCCCGAAGG	20	68	48		68	68	0		68	68	0	GGGTATCACGAGA	68	81	13	TACCCCCTTCG	81	92	11
823	caatgcttctcgtgatacccagatcatatgaaacagcatgactttttcaagagtgccatgcccgaaggGCATGGCA	1	caatgcttctcgtgatacccagatcatatgaaacagcatgactttttcaagag g tgccatgccc a ACGGTACGgga	CAATGCTTCTCGTGATACCCAGATCATATGAAACAGCATGACTTTTTCAAGAG	0	53	53	TGCCATGC	53	61	8	CC	61	63	2	GAA	63	66	3	GG	66	68	2		68	68	0	GCATGGCA	68	76	8		76	76	0
824	caatgcttctcgtgatacccagatcatatgaaacagcatgactttttcaagagtgccatgcccgaaggGTCATGCTGTTTCATGACCCAT	1	caatgcttctcgtgatacccagatcat tttttcaagagt atgaaacagcatgac g TACTTTGTCGTACTG c TACCCAG ggaagcccgtac	CAATGCTTCTCGTGATACCCAGATCAT	0	27	27	ATGAAACAGCATGAC	27	42	15		42	42	0	TTTTTCAAGAGTGCCATGCCCGAAGG	42	68	26		68	68	0		68	68	0	GTCATGCTGTTTCAT	68	83	15	GACCCAT	83	90	7
825	caatgcttctcgtgatacccagatcatatgaaacagcatgactttttcaagagtgccatgcccgaaggCCATGCTGTTTCATATC	1	caatgcttctcgtgatacccagatc actttttcaagagt atatgaaacagcatg g TATACTTTGTCGTACCggaagcccgtacc C	CAATGCTTCTCGTGATACCCAGATC	0	25	25	ATATGAAACAGCATG	25	40	15		40	40	0	ACTTTTTCAAGAGTGCCATGCCCGAAGG	40	68	28		68	68	0	C	68	69	1	CATGCTGTTTCATAT	69	84	15	C	84	85	1
826	caatgcttctcgtgatacccagatcatatgaaacagcatgactttttcaagagtgccatgcccgaaggCACTCTTGAAGAAG	1	caatgcttctcgtgatacccagatcatatgaaacagcatgacttt atgc ttcaagagtgcc c AAGTTCTCACggaagc GAAG	CAATGCTTCTCGTGATACCCAGATCATATGAAACAGCATGACTTT	0	45	45	TTCAAGAGTG	45	55	10	CC	55	57	2	ATGCCCGAA	57	66	9	GG	66	68	2		68	68	0	CACTCTTGAA	68	78	10	GAAG	78	82	4
827	caatgcttctcgtgatacccagatcatatgaaacagcatgactttttcaagagtgccatgcccgaaggCCACTCTTGAAAAAGTCATA	1	caatgcttctcgtgatacccagatcatatgaaacagc atgc atgactttttcaagagtg-cc c TACTGAAAAAGTTCTCACCggaagc A	CAATGCTTCTCGTGATACCCAGATCATATGAAACAGC	0	37	37	ATGACTTTTTCAAGAGTG	37	55	18	CC	55	57	2	ATGCCCGAA	57	66	9	GG	66	68	2	C	68	69	1	CACTCTTGAAAAAGTCAT	69	87	18	A	87	88	1
828	caatgcttctcgtgatacccagatcatatgaaacagcatgactttttcaagagtgccatgcccgaaggGAGAAGCATTC	1	c gtgatacccagatcatatgaaacagcat aatgcttctc g TTACGAAGAGggaagcccgtaccgtgagaactttttca C	C	0	1	1	AATGCTTCTC	1	11	10		11	11	0	GTGATACCCAGATCATATGAAACAGCATGACTTTTTCAAGAGTGCCATGCCCGAAGG	11	68	57		68	68	0		68	68	0	GAGAAGCATT	68	78	10	C	78	79	1
829	caatgcttctcgtgatacccagatcatatgaaacagcatgactttttcaagagtgccatgcccgaaggGCATGGCATTCATGCCCTTCGGGC	1	caatgcttctcgtgatacccagatcatatgaaacagcatgactttttcaagag g tgccatgccc a ACGGTACGgga CGGGCTTCCCGTACTT	CAATGCTTCTCGTGATACCCAGATCATATGAAACAGCATGACTTTTTCAAGAG	0	53	53	TGCCATGC	53	61	8	CC	61	63	2	GAA	63	66	3	GG	66	68	2		68	68	0	GCATGGCA	68	76	8	TTCATGCCCTTCGGGC	76	92	16
830	caatgcttctcgtgatacccagatcatatgaaacagcatgactttttcaagagtgccatgcccgaaggGCAATGCTTCA	1	caatgcttctcgtgatacccagatcatatgaaacagcatgactttttcaagagtgcca g tgccc a ACGgga ACTTCGTA	CAATGCTTCTCGTGATACCCAGATCATATGAAACAGCATGACTTTTTCAAGAGTGCCA	0	58	58	TGC	58	61	3	CC	61	63	2	GAA	63	66	3	GG	66	68	2		68	68	0	GCA	68	71	3	ATGCTTCA	71	79	8
831	caatgcttctcgtgatacccagatcatatgaaacagcatgactttttcaagagtgccatgcccgaaggGCATGGCACCT	1	caatgcttctcgtgatacccagatcatatgaaacagcatgactttttcaaga g gtgccatgccc a CACGGTACGgga TC	CAATGCTTCTCGTGATACCCAGATCATATGAAACAGCATGACTTTTTCAAGA	0	52	52	GTGCCATGC	52	61	9	CC	61	63	2	GAA	63	66	3	GG	66	68	2		68	68	0	GCATGGCAC	68	77	9	CT	77	79	2
832	caatgcttctcgtgatacccagatcatatgaaacagcatgactttttcaagagtgccatgcccgaaggACTCTTGAAAAAGTCATGCTGT	1	caatgcttctcgtgatacccagatcatatgaa gccatg acagcatgactttttcaagagt c TGTCGTACTGAAAAAGTTCTCA c ggaagc	CAATGCTTCTCGTGATACCCAGATCATATGAA	0	32	32	ACAGCATGACTTTTTCAAGAGT	32	54	22		54	54	0	GCCATGCCCGAAGG	54	68	14		68	68	0		68	68	0	ACTCTTGAAAAAGTCATGCTGT	68	90	22		90	90	0
833	caatgcttctcgtgatacccagatcatatgaaacagcatgactttttcaagagtgccatgcccgaaggGGCATGGCACCCTTGAAAAAGTCATGCT	1	caatgcttctcgtgatacccagatcatatgaaacagcatgactttttcaaga g gtgccatgccc a CACGGTACGGg a TCGTACTGAAAAAGTTCC g	CAATGCTTCTCGTGATACCCAGATCATATGAAACAGCATGACTTTTTCAAGA	0	52	52	GTGCCATGCC	52	62	10	C	62	63	1	GAAG	63	67	4	G	67	68	1		68	68	0	GGCATGGCAC	68	78	10	CCTTGAAAAAGTCATGCT	78	96	18
834	caatgcttctcgtgatacccagatcatatgaaacagcatgactttttcaagagtgccatgcccgaaggCACTCTTGAAAAAGTCATCATGCTGTTTCCCT	1	caatgcttctcgtgatacccagatcatatgaaacagc atgc atgactttttcaagagtgcc c TACTGAAAAAGTTCTCACggaagc TCCCTTTGTCGTAC	CAATGCTTCTCGTGATACCCAGATCATATGAAACAGC	0	37	37	ATGACTTTTTCAAGAGTG	37	55	18	CC	55	57	2	ATGCCCGAA	57	66	9	GG	66	68	2		68	68	0	CACTCTTGAAAAAGTCAT	68	86	18	CATGCTGTTTCCCT	86	100	14
835	caatgcttctcgtgatacccagatcatatgaaacagcatgactttttcaagagtgccatgcccgaaggCCAT	1	caatgcttctcgtgatacccagatcatatgaaacagcatgactttttcaagagtgcc c atg-cc g TACCgg a a	CAATGCTTCTCGTGATACCCAGATCATATGAAACAGCATGACTTTTTCAAGAGTGCC	0	57	57	ATG	57	60	3	CC	60	62	2	CGAA	62	66	4	GG	66	68	2	C	68	69	1	CAT	69	72	3		72	72	0
836	caatgcttctcgtgatacccagatcatatgaaacagcatgactttttcaagagtgccatgcccgaaggGCATGGCACTCTTGAC	1	caatgcttctcgtgatacccagatcatatgaaacagcatgactttt g tcaagagtgccatgccc a AGTTCTCACGGTACGgga C	CAATGCTTCTCGTGATACCCAGATCATATGAAACAGCATGACTTTT	0	46	46	TCAAGAGTGCCATGC	46	61	15	CC	61	63	2	GAA	63	66	3	GG	66	68	2		68	68	0	GCATGGCACTCTTGA	68	83	15	C	83	84	1
837	caatgcttctcgtgatacccagatcatatgaaacagcatgactttttcaagagtgccatgcccgaaggTCATGCTGTTTCATATGATCATGACCTTCGGGC	1	caatgcttctcgtgataccca tttttcaagagt gatcatatgaaacagcatgac g CTAGTATACTTTGTCGTACTggaagcccgtacc CGGGCTTCCAGTA	CAATGCTTCTCGTGATACCCA	0	21	21	GATCATATGAAACAGCATGA	21	41	20	C	41	42	1	TTTTTCAAGAGTGCCATGCCCGAAG	42	67	25	G	67	68	1		68	68	0	TCATGCTGTTTCATATGATC	68	88	20	ATGACCTTCGGGC	88	101	13
838	caatgcttctcgtgatacccagatcatatgaaacagcatgactttttcaagagtgccatgcccgaaggGGCGTGGCACTCT	1	caatgcttctcgtgatacccagatcatatgaaacagcatgactttttcaagagtgccat g gccc a CGGg a TCTCACGGTG g	CAATGCTTCTCGTGATACCCAGATCATATGAAACAGCATGACTTTTTCAAGAGTGCCAT	0	59	59	GCC	59	62	3	C	62	63	1	GAAG	63	67	4	G	67	68	1		68	68	0	GGC	68	71	3	GTGGCACTCT	71	81	10
839	caatgcttctcgtgatacccagatcatatgaaacagcatgactttttcaagagtgccatgcccgaaggGTCATGCTGTTTCATATGATCTGG	1	caatgcttctcgtgatac tttttcaagagt ccagatcatatgaaacagcatgac g GGTCTAGTATACTTTGTCGTACTG c ggaagcccgtac	CAATGCTTCTCGTGATAC	0	18	18	CCAGATCATATGAAACAGCATGAC	18	42	24		42	42	0	TTTTTCAAGAGTGCCATGCCCGAAGG	42	68	26		68	68	0		68	68	0	GTCATGCTGTTTCATATGATCTGG	68	92	24		92	92	0
840	caatgcttctcgtgatacccagatcatatgaaacagcatgactttttcaagagtgccatgcccgaaggGGCATGGCACTCTTCGGGCATGG	1	caatgcttctcgtgatacccagatcatatgaaacagcatgactttttc g aagagtgccatgccc a TTCTCACGGTACGGg a GGTACGGGC g	CAATGCTTCTCGTGATACCCAGATCATATGAAACAGCATGACTTTTTC	0	48	48	AAGAGTGCCATGCC	48	62	14	C	62	63	1	GAAG	63	67	4	G	67	68	1		68	68	0	GGCATGGCACTCTT	68	82	14	CGGGCATGG	82	91	9
841	caatgcttctcgtgatacccagatcatatgaaacagcatgactttttcaagagtgccatgcccgaaggCATGGCACTCTTGAAAA	1	caatgcttctcgtgatacccagatcatatgaaacagcatgact c ttttcaagagtgccatgcc g AAAAGTTCTCACGGTACgg a a	CAATGCTTCTCGTGATACCCAGATCATATGAAACAGCATGACT	0	43	43	TTTTCAAGAGTGCCATG	43	60	17	CC	60	62	2	CGAA	62	66	4	GG	66	68	2		68	68	0	CATGGCACTCTTGAAAA	68	85	17		85	85	0
842	caatgcttctcgtgatacccagatcatatgaaacagcatgactttttcaagagtgccatgcccgaaggCACTCTTGAAAAAGTCT	1	caatgcttctcgtgatacccagatcatatgaaacagcat atgc gactttttcaagagtgcc c CTGAAAAAGTTCTCACggaagc T	CAATGCTTCTCGTGATACCCAGATCATATGAAACAGCAT	0	39	39	GACTTTTTCAAGAGTG	39	55	16	CC	55	57	2	ATGCCCGAA	57	66	9	GG	66	68	2		68	68	0	CACTCTTGAAAAAGTC	68	84	16	T	84	85	1
843	caatgcttctcgtgatacccagatcatatgaaacagcatgactttttcaagagtgccatgcccgaaggAGTCATGCTGTTTCATGACTCCTTCGGGCAT	1	caatgcttctcgtgatacccagatcat ttttcaagagtg atgaaacagcatgact c TACTTTGTCGTACTGAggaagcccgtac TACGGGCTTCCTCAG	CAATGCTTCTCGTGATACCCAGATCAT	0	27	27	ATGAAACAGCATGACT	27	43	16		43	43	0	TTTTCAAGAGTGCCATGCCCGAAGG	43	68	25		68	68	0		68	68	0	AGTCATGCTGTTTCAT	68	84	16	GACTCCTTCGGGCAT	84	99	15
844	caatgcttctcgtgatacccagatcatatgaaacagcatgactttttcaagagtgccatgcccgaaggGGGCATGGCACTCTAGAAAAAGTCATGCT	1	caatgcttctcgtgatacccagatcatatgaaacagcatgactttttca ga agagtgccatgccc a TCTCACGGTACGGGgg TCGTACTGAAAAAGA	CAATGCTTCTCGTGATACCCAGATCATATGAAACAGCATGACTTTTTCA	0	49	49	AGAGTGCCATGCCC	49	63	14		63	63	0	GAAGG	63	68	5		68	68	0		68	68	0	GGGCATGGCACTCT	68	82	14	AGAAAAAGTCATGCT	82	97	15
845	caatgcttctcgtgatacccagatcatatgaaacagcatgactttttcaagagtgccatgcccgaaggGCAATGCTTCTCA	1	caatgcttctcgtgatacccagatcatatgaaacagcatgactttttcaagagtgcca g tgccc a ACGgga ACTCTTCGTA	CAATGCTTCTCGTGATACCCAGATCATATGAAACAGCATGACTTTTTCAAGAGTGCCA	0	58	58	TGC	58	61	3	CC	61	63	2	GAA	63	66	3	GG	66	68	2		68	68	0	GCA	68	71	3	ATGCTTCTCA	71	81	10
846	caatgcttctcgtgatacccagatcatatgaaacagcatgactttttcaagagtgccatgcccgaaggCATGGCACTCC	1	caatgcttctcgtgatacccagatcatatgaaacagcatgactttttcaa c gagtgccatgcc g CTCACGGTACgg a C a	CAATGCTTCTCGTGATACCCAGATCATATGAAACAGCATGACTTTTTCAA	0	50	50	GAGTGCCATG	50	60	10	CC	60	62	2	CGAA	62	66	4	GG	66	68	2		68	68	0	CATGGCACTC	68	78	10	C	78	79	1
847	caatgcttctcgtgatacccagatcatatgaaacagcatgactttttcaagagtgccatgcccgaaggCAATGGCACTCTTGAAAAAGTCAT	1	caatgcttctcgtgatacccagatcatatgaaacagc gcccg atgactttttcaagagtgccat a TACTGAAAAAGTTCTCACGGTAACgga	CAATGCTTCTCGTGATACCCAGATCATATGAAACAGC	0	37	37	ATGACTTTTTCAAGAGTGCCAT	37	59	22		59	59	0	GCCCGAAGG	59	68	9		68	68	0	CA	68	70	2	ATGGCACTCTTGAAAAAGTCAT	70	92	22		92	92	0
848	caatgcttctcgtgatacccagatcatatgaaacagcatgactttttcaagagtgccatgcccgaaggAAGAGTGCC	1	caatg tcgtgatacccagatcatatgaaacagc cttc a GAAg t CCGTGA gaagcccgtaccgtgagaactttttcag	CAATG	0	5	5	CTT	5	8	3	C	8	9	1	TCGTGATACCCAGATCATATGAAACAGCATGACTTTTTCAAGAGTGCCATGCCCGAAG	9	67	58	G	67	68	1		68	68	0	AAG	68	71	3	AGTGCC	71	77	6
849	caatgcttctcgtgatacccagatcatatgaaacagcatgactttttcaagagtgccatgcccgaaggGCATGGCAAT	1	caatgcttctcgtgatacccagatcatatgaaacagcatgactttttcaagag g tgccatgccc a ACGGTACGgga TA	CAATGCTTCTCGTGATACCCAGATCATATGAAACAGCATGACTTTTTCAAGAG	0	53	53	TGCCATGC	53	61	8	CC	61	63	2	GAA	63	66	3	GG	66	68	2		68	68	0	GCATGGCA	68	76	8	AT	76	78	2
850	caatgcttctcgtgatacccagatcatatgaaacagcatgactttttcaagagtgccatgcccgaaggTCATGCTGTTTCATACCC	1	caatgcttctcgtgatacccagatca tttttcaagagt tatgaaacagcatgac g ATACTTTGTCGTACTggaagcccgtacc CCC	CAATGCTTCTCGTGATACCCAGATCA	0	26	26	TATGAAACAGCATGA	26	41	15	C	41	42	1	TTTTTCAAGAGTGCCATGCCCGAAG	42	67	25	G	67	68	1		68	68	0	TCATGCTGTTTCATA	68	83	15	CCC	83	86	3
851	caatgcttctcgtgatacccagatcatatgaaacagcatgactttttcaagagtgccatgcccgaaggGCACTCTTGAAAAAGAGTGCCCTTC	1	caatgcttctcgtgatacccagatcatatgaaacagcatga atgc ctttttcaagagtgcc c GAAAAAGTTCTCACGg c CTTCCCGTGA gaag	CAATGCTTCTCGTGATACCCAGATCATATGAAACAGCATGA	0	41	41	CTTTTTCAAGAGTGC	41	56	15	C	56	57	1	ATGCCCGAAG	57	67	10	G	67	68	1		68	68	0	GCACTCTTGAAAAAG	68	83	15	AGTGCCCTTC	83	93	10
852	caatgcttctcgtgatacccagatcatatgaaacagcatgactttttcaagagtgccatgcccgaaggCCATGCTGTTTCATAA	1	caatgcttctcgtgatacccagatca actttttcaagagt tatgaaacagcatg g ATACTTTGTCGTACCggaagcccgtacc A	CAATGCTTCTCGTGATACCCAGATCA	0	26	26	TATGAAACAGCATG	26	40	14		40	40	0	ACTTTTTCAAGAGTGCCATGCCCGAAGG	40	68	28		68	68	0	C	68	69	1	CATGCTGTTTCATA	69	83	14	A	83	84	1
853	caatgcttctcgtgatacccagatcatatgaaacagcatgactttttcaagagtgccatgcccgaaggGCACTCTTGAAAAAGAT	1	caatgcttctcgtgatacccagatcatatgaaacagcatga atgc ctttttcaagagtgcc c GAAAAAGTTCTCACGg c TA gaag	CAATGCTTCTCGTGATACCCAGATCATATGAAACAGCATGA	0	41	41	CTTTTTCAAGAGTGC	41	56	15	C	56	57	1	ATGCCCGAAG	57	67	10	G	67	68	1		68	68	0	GCACTCTTGAAAAAG	68	83	15	AT	83	85	2
854	caatgcttctcgtgatacccagatcatatgaaacagcatgactttttcaagagtgccatgcccgaaggCACTCTTGAAAAAGTCAAT	1	caatgcttctcgtgatacccagatcatatgaaacagca atgc tgactttttcaagagtgcc c ACTGAAAAAGTTCTCACggaagc TA	CAATGCTTCTCGTGATACCCAGATCATATGAAACAGCA	0	38	38	TGACTTTTTCAAGAGTG	38	55	17	CC	55	57	2	ATGCCCGAA	57	66	9	GG	66	68	2		68	68	0	CACTCTTGAAAAAGTCA	68	85	17	AT	85	87	2
855	caatgcttctcgtgatacccagatcatatgaaacagcatgactttttcaagagtgccatgcccgaaggGCATGGCACTGCCCTTCGGGCAT	1	caatgcttctcgtgatacccagatcatatgaaacagcatgactttttcaag g agtgccatgccc a TCACGGTACGgga TACGGGCTTCCCG	CAATGCTTCTCGTGATACCCAGATCATATGAAACAGCATGACTTTTTCAAG	0	51	51	AGTGCCATGC	51	61	10	CC	61	63	2	GAA	63	66	3	GG	66	68	2		68	68	0	GCATGGCACT	68	78	10	GCCCTTCGGGCAT	78	91	13
856	caatgcttctcgtgatacccagatcatatgaaacagcatgactttttcaagagtgccatgcccgaaggCCATGCTGTTTCATATGGAA	1	caatgcttctcgtgatacccagat actttttcaagagt catatgaaacagcatg g GTATACTTTGTCGTACCggaagcccgtacc AAG	CAATGCTTCTCGTGATACCCAGAT	0	24	24	CATATGAAACAGCATG	24	40	16		40	40	0	ACTTTTTCAAGAGTGCCATGCCCGAAGG	40	68	28		68	68	0	C	68	69	1	CATGCTGTTTCATATG	69	85	16	GAA	85	88	3
857	caatgcttctcgtgatacccagatcatatgaaacagcatgactttttcaagagtgccatgcccgaaggTCATGCTGTTTCATAAGATCTGGGTAT	1	caatgcttctcgtgatacccagatca tttttcaagagt tatgaaacagcatgac g ATACTTTGTCGTACTggaagcccgtacc TATGGGTCTAGA	CAATGCTTCTCGTGATACCCAGATCA	0	26	26	TATGAAACAGCATGA	26	41	15	C	41	42	1	TTTTTCAAGAGTGCCATGCCCGAAG	42	67	25	G	67	68	1		68	68	0	TCATGCTGTTTCATA	68	83	15	AGATCTGGGTAT	83	95	12
858	caatgcttctcgtgatacccagatcatatgaaacagcatgactttttcaagagtgccatgcccgaaggGCATTGAGCCCTTCGGGA	1	caatgcttctcgtgatacccagatcatatgaaacagcatgactttttcaagagtgccatg GCAT cccgaagg T GGGCTTCCCGAG A	CAATGCTTCTCGTGATACCCAGATCATATGAAACAGCATGACTTTTTCAAGAGTGCCATG	0	60	60	CCCGAAGG	60	68	8		68	68	0		68	68	0		68	68	0	GCATTGAGC	68	77	9	CCTTCGGG	77	85	8	A	85	86	1
ParseRabbit Target	lDG17-4_AF-DG-140_enzyme_S4_merged.fastq.gz	ParseRabbit Description	ParseRabbit version ag00 11_05_24: Flexible code for Excel Generation from high throughput sequence data|| General use|| pypy ParseRabbit## input=<Sequence_read.fastq.gz> template=<input_oligonucleotide>|| ParseRabbit is a tool for building Excel workbooks that list and provisionally parse reads from a sequencing run|| Each output worksheet consists of|| a. an introductory header including specif…	ParseRabbit Command Line	/home/drewgalls/Desktop/ExtensionPaperRevisions/SupplementaryTableS2/ParseRabbit_ag00_110524_DGedits.py||input=/home/drewgalls/Desktop/ExtensionPaperRevisions/lDG17/lDG17-4_AF-DG-140_enzyme_S4_merged.fastq.gz||Template=CAATGCTTCTCGTGATACCCAGATCATATGAAACAGCATGACTTTTTCAAGAGTGCCATGCCCGAAGG	ParseRabbit Execution Detail	VSG Run Details:|| Python Interpreter: 3.7.12 | packaged by conda-forge | (44db2626, Nov 15 2021, 12:53:46) [PyPy 7.3.7 with GCC 9.4.0]|| VSG Version: VSG2FO_070524 Run at 13:10 on 12/28/24|| Script: ParseRabbit_ag00_110524_DGedits.py (modified 2024-12-28 13:05:09)|| Script Directory: /home/drewgalls/Desktop/ExtensionPaperRevisions/SupplementaryTableS2|| Parameters:|| input=/home/drewgalls/Deskto…	ParseRabbit TimeStamp	D_12_28_24_T_13_10_38	ParseRabbit VSGLog	VSG Run Details:|| Python Interpreter: 3.7.12 | packaged by conda-forge | (44db2626, Nov 15 2021, 12:53:46) [PyPy 7.3.7 with GCC 9.4.0]|| VSG Version: VSG2FO_070524 Run at 13:10 on 12/28/24|| Script: ParseRabbit_ag00_110524_DGedits.py (modified 2024-12-28 13:05:09)|| Script Directory: /home/drewgalls/Desktop/ExtensionPaperRevisions/SupplementaryTableS2|| Parameters:|| input=/home/drewgalls/Deskto…	ParseRabbit Python Code	########################||## ParseRabbit version ag00 11_05_24: Flexible code for Excel Generation from high throughput sequence data||## General use||## pypy ParseRabbit## input=<Sequence_read.fastq.gz> template=<input_oligonucleotide> ||## ParseRabbit is a tool for building Excel workbooks that list and provisionally parse reads from a sequencing run||## Each output worksheet consists of||## a.…

## Sheet: lDG17-8_LR-3prime
<!--ParseRabbit_Task_Header: /home/drewgalls/Desktop/ExtensionPaperRevisions/lDG17/lDG17-8_AF-DG-140_Rep2_enzyme_S8_mergedD_12_28_24_T_13_10_42_Parsed.xlsx-->
<!--Command_Line: /home/drewgalls/Desktop/ExtensionPaperRevisions/SupplementaryTableS2/ParseRabbit_ag00_110524_DGedits.py input=/home/drewgalls/Desktop/ExtensionPaperRevisions/lDG17/lDG17-8_AF-DG-140_Rep2_enzyme_S8_merged.fastq.gz Template=CAATGCTTCTCGTGATACCCAGATCATATGAAACAGCATGACTTTTTCAAGAGTGCCATGCCCGAAGG-->
<!--PythonVersion: 3.7.12 | packaged by conda-forge | (44db2626, Nov 15 2021, 12:53:46),[PyPy 7.3.7 with GCC 9.4.0]-->
<!--ParseRabbit_Version: /home/drewgalls/Desktop/ExtensionPaperRevisions/SupplementaryTableS2/ParseRabbit_ag00_110524_DGedits.py,#,Path=/home/drewgalls/Desktop/ExtensionPaperRevisions/SupplementaryTableS2/ParseRabbit_ag00_110524_DGedits.py,Size=25043,Accessed=12_28_24_at_13_10_10,Modified=12_28_24_at_13_05_09,Created=12_28_24_at_13_05_09,FullInfo=os.stat_result(st_mode=33188, st_ino=19796425, st_…
<!--RunTime: D_12_28_24_T_13_10_42-->
<!--RunDirectory: /home/drewgalls/Desktop/ExtensionPaperRevisions/Inputs_Code-->
<!--NOTE THAT CELLS MAY NEED TO BE VERTICALLY EXPANDED TO SEE FULL VISUALIZATION-->
<!---->
<!--	Output_Key		-->
<!--	ColumnNumber	ColumnHeader	-->
<!--	0	Rank_/home/drewgalls/Desktop/ExtensionPaperRevisions/lDG17/lDG17-8_AF-DG-140_Rep2_enzyme_S8_merged.fastq.gz	-->
<!--	1	Sequence_	-->
<!--	2	Count_/home/drewgalls/Desktop/ExtensionPaperRevisions/lDG17/lDG17-8_AF-DG-140_Rep2_enzyme_S8_merged.fastq.gz	-->
<!--	3	PreliminarySimpleParse_/home/drewgalls/Desktop/ExtensionPaperRevisions/SupplementaryTableS2/ParseRabbit_ag00_110524_DGedits	-->
<!--	4	fray_seg_seq	-->
<!--	5	fray_seg_begin	-->
<!--	6	fray_seg_end	-->
<!--	7	fray_seg_length	-->
<!--	8	template_seg_seq	-->
<!--	9	template_seg_begin	-->
<!--	10	template_seg_end	-->
<!--	11	template_seg_length	-->
<!--	12	stem_seg_seq	-->
<!--	13	stem_seg_begin	-->
<!--	14	stem_seg_end	-->
<!--	15	stem_seg_length	-->
<!--	16	loop_seg_seq	-->
<!--	17	loop_seg_begin	-->
<!--	18	loop_seg_end	-->
<!--	19	loop_seg_length	-->
<!--	20	primer_seg_seq	-->
<!--	21	primer_seg_begin	-->
<!--	22	primer_seg_end	-->
<!--	23	primer_seg_length	-->
<!--	24	Bulge_seg_seq	-->
<!--	25	Bulge_seg_begin	-->
<!--	26	Bulge_seg_end	-->
<!--	27	Bulge_seg_length	-->
<!--	28	Complement_seg_seq	-->
<!--	29	Complement_seg_begin	-->
<!--	30	Complement_seg_end	-->
<!--	31	Complement_seg_length	-->
<!--	32	Extra_seg_seq	-->
<!--	33	Extra_seg_begin	-->
<!--	34	Extra_seg_end	-->
<!--	35	Extra_seg_length	-->
Rank_/home/drewgalls/Desktop/ExtensionPaperRevisions/lDG17/lDG17-8_AF-DG-140_Rep2_enzyme_S8_merged.fastq.gz	Sequence_	Count_/home/drewgalls/Desktop/ExtensionPaperRevisions/lDG17/lDG17-8_AF-DG-140_Rep2_enzyme_S8_merged.fastq.gz	PreliminarySimpleParse_/home/drewgalls/Desktop/ExtensionPaperRevisions/SupplementaryTableS2/ParseRabbit_ag00_110524_DGedits	fray_seg_seq	fray_seg_begin	fray_seg_end	fray_seg_length	template_seg_seq	template_seg_begin	template_seg_end	template_seg_length	stem_seg_seq	stem_seg_begin	stem_seg_end	stem_seg_length	loop_seg_seq	loop_seg_begin	loop_seg_end	loop_seg_length	primer_seg_seq	primer_seg_begin	primer_seg_end	primer_seg_length	Bulge_seg_seq	Bulge_seg_begin	Bulge_seg_end	Bulge_seg_length	Complement_seg_seq	Complement_seg_begin	Complement_seg_end	Complement_seg_length	Extra_seg_seq	Extra_seg_begin	Extra_seg_end	Extra_seg_length	<!--ParseRabbit_Task_Header: /home/drewgalls/Desktop/ExtensionPaperRevisions/lDG17/lDG17-8_AF-DG-140_Rep2_enzyme_S8_mergedD_12_28_24_T_13_10_42_Parsed.xlsx--><!--Command_Line: /home/drewgalls/Desktop/ExtensionPaperRevisions/SupplementaryTableS2/ParseRabbit_ag00_110524_DGedits.py input=/home/drewgalls/Desktop/ExtensionPaperRevisions/lDG17/lDG17-8_AF-DG-140_Rep2_enzyme_S8_merged.fastq.gz Template=C…
1	caatgcttctcgtgatacccagatcatatgaaacagcatgactttttcaagagtgccatgcccgaagg	765	caatgcttctcgtgatacccagatcatatgaaacagcatgactttttcaagagtgccatgcccgaag g	CAATGCTTCTCGTGATACCCAGATCATATGAAACAGCATGACTTTTTCAAGAGTGCCATGCCCGAAGG	0	68	68		68	68	0		68	68	0		68	68	0		68	68	0		68	68	0		68	68	0		68	68	0
2	caatgcttctcgtgatacccagatcatatgaaacagcatgactttttcaagagtgccatgcccgaaggG	60	caatgcttctcgtgatacccagatcatatgaaacagcatgactttttcaagagtgccatgcccgaag g G	CAATGCTTCTCGTGATACCCAGATCATATGAAACAGCATGACTTTTTCAAGAGTGCCATGCCCGAAGG	0	68	68		68	68	0		68	68	0		68	68	0		68	68	0		69	69	0		69	69	0		69	69	0
3	caatgcttctcgtgatacccagatcatatgaaacagcatgactttttcaagagtgccatgcccgaaggCACTCTTGAAAAA	31	caatgcttctcgtgatacccagatcatatgaaacagcatgac atgc tttttcaagagtgcc c AAAAAGTTCTCACggaagc	CAATGCTTCTCGTGATACCCAGATCATATGAAACAGCATGAC	0	42	42	TTTTTCAAGAGTG	42	55	13	CC	55	57	2	ATGCCCGAA	57	66	9	GG	66	68	2		68	68	0	CACTCTTGAAAAA	68	81	13		81	81	0
4	caatgcttctcgtgatacccagatcatatgaaacagcatgactttttcaagagtgccatgcccgaaggCACTCTTGAAAAAGTCAT	23	caatgcttctcgtgatacccagatcatatgaaacagc atgc atgactttttcaagagtgcc c TACTGAAAAAGTTCTCACggaagc	CAATGCTTCTCGTGATACCCAGATCATATGAAACAGC	0	37	37	ATGACTTTTTCAAGAGTG	37	55	18	CC	55	57	2	ATGCCCGAA	57	66	9	GG	66	68	2		68	68	0	CACTCTTGAAAAAGTCAT	68	86	18		86	86	0
5	caatgcttctcgtgatacccagatcatatgaaacagcatgactttttcaagagtgccatgcccgaaggA	16	caatgcttctcgtgatacccagatcatatgaaacagcatgactttttcaagagtgccatgcccgaag g A	CAATGCTTCTCGTGATACCCAGATCATATGAAACAGCATGACTTTTTCAAGAGTGCCATGCCCGAAGG	0	68	68		68	68	0		68	68	0		68	68	0		68	68	0		69	69	0		69	69	0		69	69	0
6	caatgcttctcgtgatacccagatcatatgaaacagcatgactttttcaagagtgccatgcccgaaggTCATGCTGTTTCAT	16	caatgcttctcgtgatacccagatcat tttttcaagagt atgaaacagcatgac g TACTTTGTCGTACTggaagcccgtacc	CAATGCTTCTCGTGATACCCAGATCAT	0	27	27	ATGAAACAGCATGA	27	41	14	C	41	42	1	TTTTTCAAGAGTGCCATGCCCGAAG	42	67	25	G	67	68	1		68	68	0	TCATGCTGTTTCAT	68	82	14		82	82	0
7	caatgcttctcgtgatacccagatcatatgaaacagcatgactttttcaagagtgccatgcccgaaggCACTCTTGAAAAAGTCATGCT	15	caatgcttctcgtgatacccagatcatatgaaac atgc agcatgactttttcaagagtgcc c TCGTACTGAAAAAGTTCTCACggaagc	CAATGCTTCTCGTGATACCCAGATCATATGAAAC	0	34	34	AGCATGACTTTTTCAAGAGTG	34	55	21	CC	55	57	2	ATGCCCGAA	57	66	9	GG	66	68	2		68	68	0	CACTCTTGAAAAAGTCATGCT	68	89	21		89	89	0
8	caatgcttctcgtgatacccagatcatatgaaacagcatgactttttcaagagtgccatgcccgaaggGGCATGGCACTCA	14	caatgcttctcgtgatacccagatcatatgaaacagcatgactttttcaa g gagtgccatgccc a CTCACGGTACGGg a A g	CAATGCTTCTCGTGATACCCAGATCATATGAAACAGCATGACTTTTTCAA	0	50	50	GAGTGCCATGCC	50	62	12	C	62	63	1	GAAG	63	67	4	G	67	68	1		68	68	0	GGCATGGCACTC	68	80	12	A	80	81	1
9	caatgcttctcgtgatacccagatcatatgaaacagcatgactttttcaagagtgccatgcccgaaggC	14	caatgcttctcgtgatacccagatcatatgaaacagcatgactttttcaagagtgccatgcccgaag g C	CAATGCTTCTCGTGATACCCAGATCATATGAAACAGCATGACTTTTTCAAGAGTGCCATGCCCGAAGG	0	68	68		68	68	0		68	68	0		68	68	0		68	68	0		69	69	0		69	69	0		69	69	0
10	caatgcttctcgtgatacccagatcatatgaaacagcatgactttttcaagagtgccatgcccgaaggGT	13	caatgcttctcgtgat agatcatatgaaacagcatgac accc t TGgg t aagcccgtaccgtgagaacttt	CAATGCTTCTCGTGAT	0	16	16	AC	16	18	2	CC	18	20	2	AGATCATATGAAACAGCATGACTTTTTCAAGAGTGCCATGCCCGAA	20	66	46	GG	66	68	2		68	68	0	GT	68	70	2		70	70	0
11	caatgcttctcgtgatacccagatcatatgaaacagcatgactttttcaagagtgccatgcccgaaggGTATCACGAGAAGCATTGA	13	agatcatatgaaacagcatgac caatgcttctcgtgataccc t GTTACGAAGAGCACTATGgg t A aagcccgtaccgtgagaacttt		0	0	0	CAATGCTTCTCGTGATAC	0	18	18	CC	18	20	2	AGATCATATGAAACAGCATGACTTTTTCAAGAGTGCCATGCCCGAA	20	66	46	GG	66	68	2		68	68	0	GTATCACGAGAAGCATTG	68	86	18	A	86	87	1
12	caatgcttctcgtgatacccagatcatatgaaacagcatgactttttcaagagtgccatgcccgaaggGGCATGGCACTCTT	12	caatgcttctcgtgatacccagatcatatgaaacagcatgactttttc g aagagtgccatgccc a TTCTCACGGTACGGg a g	CAATGCTTCTCGTGATACCCAGATCATATGAAACAGCATGACTTTTTC	0	48	48	AAGAGTGCCATGCC	48	62	14	C	62	63	1	GAAG	63	67	4	G	67	68	1		68	68	0	GGCATGGCACTCTT	68	82	14		82	82	0
13	caatgcttctcgtgatacccagatcatatgaaacagcatgactttttcaagagtgccatgcccgaaggGCATGGCACTCA	11	caatgcttctcgtgatacccagatcatatgaaacagcatgactttttcaa g gagtgccatgccc a CTCACGGTACGgga A	CAATGCTTCTCGTGATACCCAGATCATATGAAACAGCATGACTTTTTCAA	0	50	50	GAGTGCCATGC	50	61	11	CC	61	63	2	GAA	63	66	3	GG	66	68	2		68	68	0	GCATGGCACTC	68	79	11	A	79	80	1
14	caatgcttctcgtgatacccagatcatatgaaacagcatgactttttcaagagtgccatgcccgaaggGTATCACGAGAAGCAT	9	ca agatcatatgaaacagcatgac atgcttctcgtgataccc t TACGAAGAGCACTATGgg t aagcccgtaccgtgagaacttt	CA	0	2	2	ATGCTTCTCGTGATAC	2	18	16	CC	18	20	2	AGATCATATGAAACAGCATGACTTTTTCAAGAGTGCCATGCCCGAA	20	66	46	GG	66	68	2		68	68	0	GTATCACGAGAAGCAT	68	84	16		84	84	0
15	caatgcttctcgtgatacccagatcatatgaaacagcatgactttttcaagagtgccatgcccgaaggCACTCTTGAAAAAGTC	8	caatgcttctcgtgatacccagatcatatgaaacagcat atgc gactttttcaagagtgcc c CTGAAAAAGTTCTCACggaagc	CAATGCTTCTCGTGATACCCAGATCATATGAAACAGCAT	0	39	39	GACTTTTTCAAGAGTG	39	55	16	CC	55	57	2	ATGCCCGAA	57	66	9	GG	66	68	2		68	68	0	CACTCTTGAAAAAGTC	68	84	16		84	84	0
16	caatgcttctcgtgatacccagatcatatgaaacagcatgactttttcaagagtgccatgcccgaaggGCATGGCACTCTTGAAAAA	7	caatgcttctcgtgatacccagatcatatgaaacagcatgac g tttttcaagagtgccatgccc a AAAAAGTTCTCACGGTACGgga	CAATGCTTCTCGTGATACCCAGATCATATGAAACAGCATGAC	0	42	42	TTTTTCAAGAGTGCCATGC	42	61	19	CC	61	63	2	GAA	63	66	3	GG	66	68	2		68	68	0	GCATGGCACTCTTGAAAAA	68	87	19		87	87	0
17	caatgcttctcgtgatacccagatcatatgaaacagcatgactttttcaagagtgccatgcccgaaggTCATGCTGTTTCATAT	7	caatgcttctcgtgatacccagatc tttttcaagagt atatgaaacagcatgac g TATACTTTGTCGTACTggaagcccgtacc	CAATGCTTCTCGTGATACCCAGATC	0	25	25	ATATGAAACAGCATGA	25	41	16	C	41	42	1	TTTTTCAAGAGTGCCATGCCCGAAG	42	67	25	G	67	68	1		68	68	0	TCATGCTGTTTCATAT	68	84	16		84	84	0
18	caatgcttctcgtgatacccagatcatatgaaacagcatgactttttcaagagtgccatgcccgaaggT	7	caatgcttctcgtgatacccagatcatatgaaacagcatgactttttcaagagtgccatgcccgaag g T	CAATGCTTCTCGTGATACCCAGATCATATGAAACAGCATGACTTTTTCAAGAGTGCCATGCCCGAAGG	0	68	68		68	68	0		68	68	0		68	68	0		68	68	0		69	69	0		69	69	0		69	69	0
19	caatgcttctcgtgatacccagatcatatgaaacagcatgactttttcaagagtgccatgcccgaaggGTATCACGAGAAGCATTGG	7	agatcatatgaaacagcatgac caatgcttctcgtgataccc t GTTACGAAGAGCACTATGgg t G aagcccgtaccgtgagaacttt		0	0	0	CAATGCTTCTCGTGATAC	0	18	18	CC	18	20	2	AGATCATATGAAACAGCATGACTTTTTCAAGAGTGCCATGCCCGAA	20	66	46	GG	66	68	2		68	68	0	GTATCACGAGAAGCATTG	68	86	18	G	86	87	1
20	caatgcttctcgtgatacccagatcatatgaaacagcatgactttttcaagagtgccatgcccgaaggCCATGCTGTTTCAT	6	caatgcttctcgtgatacccagatcat actttttcaagagt atgaaacagcatg g TACTTTGTCGTACCggaagcccgtacc	CAATGCTTCTCGTGATACCCAGATCAT	0	27	27	ATGAAACAGCATG	27	40	13		40	40	0	ACTTTTTCAAGAGTGCCATGCCCGAAGG	40	68	28		68	68	0	C	68	69	1	CATGCTGTTTCAT	69	82	13		82	82	0
21	caatgcttctcgtgatacccagatcatatgaaacagcatgactttttcaagagtgccatgcccgaaggTCATGCTGTTTCATATGATCT	6	caatgcttctcgtgataccc tttttcaagagt agatcatatgaaacagcatgac g TCTAGTATACTTTGTCGTACTggaagcccgtacc	CAATGCTTCTCGTGATACCC	0	20	20	AGATCATATGAAACAGCATGA	20	41	21	C	41	42	1	TTTTTCAAGAGTGCCATGCCCGAAG	42	67	25	G	67	68	1		68	68	0	TCATGCTGTTTCATATGATCT	68	89	21		89	89	0
22	caatgcttctcgtgatacccagatcatatgaaacagcatgactttttcaagagtgccatgcccgaaggGC	6	caatgcttctcgtgatacccagatcatatgaaacagcatgactttttcaagagtgccat g gccc a CGgga	CAATGCTTCTCGTGATACCCAGATCATATGAAACAGCATGACTTTTTCAAGAGTGCCAT	0	59	59	GC	59	61	2	CC	61	63	2	GAA	63	66	3	GG	66	68	2		68	68	0	GC	68	70	2		70	70	0
23	caatgcttctcgtgatacccagatcatatgaaacagcatgactttttcaagagtgccatgcccgaaggTCATGCTGTTTCATGACCTTCGGGCAT	6	caatgcttctcgtgatacccagatcat tttttcaagagt atgaaacagcatgac g TACTTTGTCGTACTggaagcccgtacc TACGGGCTTCCAG	CAATGCTTCTCGTGATACCCAGATCAT	0	27	27	ATGAAACAGCATGA	27	41	14	C	41	42	1	TTTTTCAAGAGTGCCATGCCCGAAG	42	67	25	G	67	68	1		68	68	0	TCATGCTGTTTCAT	68	82	14	GACCTTCGGGCAT	82	95	13
24	caatgcttctcgtgatacccagatcatatgaaacagcatgactttttcaagagtgccatgcccgaaggGA	5	caatgcttctcgtgatacccagatcatatgaaacagcatgactttttcaagagtgccatgcccgaag g G A	CAATGCTTCTCGTGATACCCAGATCATATGAAACAGCATGACTTTTTCAAGAGTGCCATGCCCGAAGG	0	68	68		68	68	0		68	68	0		68	68	0		68	68	0		70	70	0		70	70	0		70	70	0
25	caatgcttctcgtgatacccagatcatatgaaacagcatgactttttcaagagtgccatgcccgaaggGCATGGCACT	5	caatgcttctcgtgatacccagatcatatgaaacagcatgactttttcaag g agtgccatgccc a TCACGGTACGgga	CAATGCTTCTCGTGATACCCAGATCATATGAAACAGCATGACTTTTTCAAG	0	51	51	AGTGCCATGC	51	61	10	CC	61	63	2	GAA	63	66	3	GG	66	68	2		68	68	0	GCATGGCACT	68	78	10		78	78	0
26	caatgcttctcgtgatacccagatcatatgaaacagcatgactttttcaagagtgccatgcccgaaggGCATGGCACTCTTGAAAAGTCATGCTGT	5	caatgcttctcgtgatacccagatcatatgaaacagcatgact g ttttcaagagtgccatgccc a AAAAGTTCTCACGGTACGgga TGTCGTACTG	CAATGCTTCTCGTGATACCCAGATCATATGAAACAGCATGACT	0	43	43	TTTTCAAGAGTGCCATGC	43	61	18	CC	61	63	2	GAA	63	66	3	GG	66	68	2		68	68	0	GCATGGCACTCTTGAAAA	68	86	18	GTCATGCTGT	86	96	10
27	caatgcttctcgtgatacccagatcatatgaaacagcatgactttttcaagagtgccatgcccgaaggGTATCACGAGAAGCATTG	5	agatcatatgaaacagcatgac caatgcttctcgtgataccc t GTTACGAAGAGCACTATGgg t aagcccgtaccgtgagaacttt		0	0	0	CAATGCTTCTCGTGATAC	0	18	18	CC	18	20	2	AGATCATATGAAACAGCATGACTTTTTCAAGAGTGCCATGCCCGAA	20	66	46	GG	66	68	2		68	68	0	GTATCACGAGAAGCATTG	68	86	18		86	86	0
28	caatgcttctcgtgatacccagatcatatgaaacagcatgactttttcaagagtgccatgcccgaaggCA	5	caatgcttctcgtgatacccagatcatatgaaacagcatgactttttcaagagtgcca c tgcc g ACgg a a	CAATGCTTCTCGTGATACCCAGATCATATGAAACAGCATGACTTTTTCAAGAGTGCCA	0	58	58	TG	58	60	2	CC	60	62	2	CGAA	62	66	4	GG	66	68	2		68	68	0	CA	68	70	2		70	70	0
29	caatgcttctcgtgatacccagatcatatgaaacagcatgactttttcaagagtgccatgcccgaaggCAAT	5	caatgcttctcgtgatacccagatcatatgaaacagcatgactttttcaagagtgcca c tgcc g ACgg a TA a	CAATGCTTCTCGTGATACCCAGATCATATGAAACAGCATGACTTTTTCAAGAGTGCCA	0	58	58	TG	58	60	2	CC	60	62	2	CGAA	62	66	4	GG	66	68	2		68	68	0	CA	68	70	2	AT	70	72	2
30	caatgcttctcgtgatacccagatcatatgaaacagcatgactttttcaagagtgccatgcccgaaggGTCATGCTGTTTCATAT	5	caatgcttctcgtgatacccagatc tttttcaagagt atatgaaacagcatgac g TATACTTTGTCGTACTG c ggaagcccgtac	CAATGCTTCTCGTGATACCCAGATC	0	25	25	ATATGAAACAGCATGAC	25	42	17		42	42	0	TTTTTCAAGAGTGCCATGCCCGAAGG	42	68	26		68	68	0		68	68	0	GTCATGCTGTTTCATAT	68	85	17		85	85	0
31	caatgcttctcgtgatacccagatcatatgaaacagcatgactttttcaagagtgccatgcccgaaggGGCATGGCACTCTTGAAAAA	5	caatgcttctcgtgatacccagatcatatgaaacagcatgac g tttttcaagagtgccatgccc a AAAAAGTTCTCACGGTACGGg a g	CAATGCTTCTCGTGATACCCAGATCATATGAAACAGCATGAC	0	42	42	TTTTTCAAGAGTGCCATGCC	42	62	20	C	62	63	1	GAAG	63	67	4	G	67	68	1		68	68	0	GGCATGGCACTCTTGAAAAA	68	88	20		88	88	0
32	caatgcttctcgtgatacccagatcatatgaaacagcatgactttttcaagagtgccatgcccgaaggCCATGCTGTTTCATAT	5	caatgcttctcgtgatacccagatc actttttcaagagt atatgaaacagcatg g TATACTTTGTCGTACCggaagcccgtacc	CAATGCTTCTCGTGATACCCAGATC	0	25	25	ATATGAAACAGCATG	25	40	15		40	40	0	ACTTTTTCAAGAGTGCCATGCCCGAAGG	40	68	28		68	68	0	C	68	69	1	CATGCTGTTTCATAT	69	84	15		84	84	0
33	caatgcttctcgtgatacccagatcatatgaaacagcatgactttttcaagagtgccatgcccgaaggGGCATGGCACTCT	5	caatgcttctcgtgatacccagatcatatgaaacagcatgactttttca g agagtgccatgccc a TCTCACGGTACGGg a g	CAATGCTTCTCGTGATACCCAGATCATATGAAACAGCATGACTTTTTCA	0	49	49	AGAGTGCCATGCC	49	62	13	C	62	63	1	GAAG	63	67	4	G	67	68	1		68	68	0	GGCATGGCACTCT	68	81	13		81	81	0
34	caatgcttctcgtgatacccagatcatatgaaacagcatgactttttcaagagtgccatgcccgaaggCACTCTTGAAAAAGTCATGCTGT	4	caatgcttctcgtgatacccagatcatatgaa atgc acagcatgactttttcaagagtgcc c TGTCGTACTGAAAAAGTTCTCACggaagc	CAATGCTTCTCGTGATACCCAGATCATATGAA	0	32	32	ACAGCATGACTTTTTCAAGAGTG	32	55	23	CC	55	57	2	ATGCCCGAA	57	66	9	GG	66	68	2		68	68	0	CACTCTTGAAAAAGTCATGCTGT	68	91	23		91	91	0
35	caatgcttctcgtgatacccagatcatatgaaacagcatgactttttcaagagtgccatgcccgaaggGAT	4	caatgcttctcgtgatacccagatcatatgaaacagcatgactttttcaagagtgcc gccc at g TA a Ggga	CAATGCTTCTCGTGATACCCAGATCATATGAAACAGCATGACTTTTTCAAGAGTGCC	0	57	57	AT	57	59	2		59	59	0	GCCCGAAGG	59	68	9		68	68	0	G	68	69	1	AT	69	71	2		71	71	0
36	caatgcttctcgtgatacccagatcatatgaaacagcatgactttttcaagagtgccatgcccgaaggGTATCACGAGAAGC	4	caat agatcatatgaaacagcatgac gcttctcgtgataccc t CGAAGAGCACTATGgg t aagcccgtaccgtgagaacttt	CAAT	0	4	4	GCTTCTCGTGATAC	4	18	14	CC	18	20	2	AGATCATATGAAACAGCATGACTTTTTCAAGAGTGCCATGCCCGAA	20	66	46	GG	66	68	2		68	68	0	GTATCACGAGAAGC	68	82	14		82	82	0
37	caatgcttctcgtgatacccagatcatatgaaacagcatgactttttcaagagtgccatgcccgaaggCACTCTTGAAAAGTCATGCTGTT	4	caatgcttctcgtgatacccagatcatatgaaacagcatgact atgc ttttcaagagtgcc c AAAAGTTCTCACggaagc TTGTCGTACTG	CAATGCTTCTCGTGATACCCAGATCATATGAAACAGCATGACT	0	43	43	TTTTCAAGAGTG	43	55	12	CC	55	57	2	ATGCCCGAA	57	66	9	GG	66	68	2		68	68	0	CACTCTTGAAAA	68	80	12	GTCATGCTGTT	80	91	11
38	caatgcttctcgtgatacccagatcatatgaaacagcatgactttttcaagagtgccatgcccgaaggGCATGGCACTCG	4	caatgcttctcgtgatacccagatcatatgaaacagcatgactttttcaa g gagtgccatgccc a CTCACGGTACGgga G	CAATGCTTCTCGTGATACCCAGATCATATGAAACAGCATGACTTTTTCAA	0	50	50	GAGTGCCATGC	50	61	11	CC	61	63	2	GAA	63	66	3	GG	66	68	2		68	68	0	GCATGGCACTC	68	79	11	G	79	80	1
39	caatgcttctcgtgatacccagatcatatgaaacagcatgactttttcaagagtgccatgcccgaaggCACTCTTGAAAAAG	4	caatgcttctcgtgatacccagatcatatgaaacagcatga atgc ctttttcaagagtgcc c GAAAAAGTTCTCACggaagc	CAATGCTTCTCGTGATACCCAGATCATATGAAACAGCATGA	0	41	41	CTTTTTCAAGAGTG	41	55	14	CC	55	57	2	ATGCCCGAA	57	66	9	GG	66	68	2		68	68	0	CACTCTTGAAAAAG	68	82	14		82	82	0
40	caatgcttctcgtgatacccagatcatatgaaacagcatgactttttcaagagtgccatgcccgaaggAT	4	caatgcttctcgtgatacccag atatgaaacagcatgacttt atc t TAg t gaagcccgtaccgtgagaac	CAATGCTTCTCGTGATACCCAG	0	22	22	AT	22	24	2	C	24	25	1	ATATGAAACAGCATGACTTTTTCAAGAGTGCCATGCCCGAAG	25	67	42	G	67	68	1		68	68	0	AT	68	70	2		70	70	0
41	caatgcttctcgtgatacccagatcatatgaaacagcatgactttttcaagagtgccatgcccgaaggCCA	4	caatgcttctcgtgatacccagatcatatgaaacagcatgactttttcaagagtgcca c tg-cc g ACCgg a a	CAATGCTTCTCGTGATACCCAGATCATATGAAACAGCATGACTTTTTCAAGAGTGCCA	0	58	58	TG	58	60	2	CC	60	62	2	CGAA	62	66	4	GG	66	68	2	C	68	69	1	CA	69	71	2		71	71	0
42	caatgcttctcgtgatacccagatcatatgaaacagcatgactttttcaagagtgccatgcccgaaggCATGGCACTCTT	3	caatgcttctcgtgatacccagatcatatgaaacagcatgactttttc c aagagtgccatgcc g TTCTCACGGTACgg a a	CAATGCTTCTCGTGATACCCAGATCATATGAAACAGCATGACTTTTTC	0	48	48	AAGAGTGCCATG	48	60	12	CC	60	62	2	CGAA	62	66	4	GG	66	68	2		68	68	0	CATGGCACTCTT	68	80	12		80	80	0
43	caatgcttctcgtgatacccagatcatatgaaacagcatgactttttcaagagtgccatgcccgaaggTCATGCTGTTTCA	3	caatgcttctcgtgatacccagatcata tttttcaagagt tgaaacagcatgac g ACTTTGTCGTACTggaagcccgtacc	CAATGCTTCTCGTGATACCCAGATCATA	0	28	28	TGAAACAGCATGA	28	41	13	C	41	42	1	TTTTTCAAGAGTGCCATGCCCGAAG	42	67	25	G	67	68	1		68	68	0	TCATGCTGTTTCA	68	81	13		81	81	0
44	caatgcttctcgtgatacccagatcatatgaaacagcatgactttttcaagagtgccatgcccgaaggGGCATGGCACA	3	caatgcttctcgtgatacccagatcatatgaaacagcatgactttttcaaga g gtgccatgccc a CACGGTACGGg a A g	CAATGCTTCTCGTGATACCCAGATCATATGAAACAGCATGACTTTTTCAAGA	0	52	52	GTGCCATGCC	52	62	10	C	62	63	1	GAAG	63	67	4	G	67	68	1		68	68	0	GGCATGGCAC	68	78	10	A	78	79	1
45	caatgcttctcgtgatacccagatcatatgaaacagcatgactttttcaagagtgccatgcccgaaggCATGGCACTCTTGAAAAAGTCAT	3	caatgcttctcgtgatacccagatcatatgaaacagc c atgactttttcaagagtgccatgcc g TACTGAAAAAGTTCTCACGGTACgg a a	CAATGCTTCTCGTGATACCCAGATCATATGAAACAGC	0	37	37	ATGACTTTTTCAAGAGTGCCATG	37	60	23	CC	60	62	2	CGAA	62	66	4	GG	66	68	2		68	68	0	CATGGCACTCTTGAAAAAGTCAT	68	91	23		91	91	0
46	caatgcttctcgtgatacccagatcatatgaaacagcatgactttttcaagagtgccatgcccgaaggGCATGGCACTCAT	3	caatgcttctcgtgatacccagatcatatgaaacagcatgactttttcaa g gagtgccatgccc a CTCACGGTACGgga TA	CAATGCTTCTCGTGATACCCAGATCATATGAAACAGCATGACTTTTTCAA	0	50	50	GAGTGCCATGC	50	61	11	CC	61	63	2	GAA	63	66	3	GG	66	68	2		68	68	0	GCATGGCACTC	68	79	11	AT	79	81	2
47	caatgcttctcgtgatacccagatcatatgaaacagcatgactttttcaagagtgccatgcccgaaggCACTCTTGAAAAAGTCATGC	3	caatgcttctcgtgatacccagatcatatgaaaca atgc gcatgactttttcaagagtgcc c CGTACTGAAAAAGTTCTCACggaagc	CAATGCTTCTCGTGATACCCAGATCATATGAAACA	0	35	35	GCATGACTTTTTCAAGAGTG	35	55	20	CC	55	57	2	ATGCCCGAA	57	66	9	GG	66	68	2		68	68	0	CACTCTTGAAAAAGTCATGC	68	88	20		88	88	0
48	caatgcttctcgtgatacccagatcatatgaaacagcatgactttttcaagagtgccatgcccgaaggGCATGGCACTCTT	3	caatgcttctcgtgatacccagatcatatgaaacagcatgactttttc g aagagtgccatgccc a TTCTCACGGTACGgga	CAATGCTTCTCGTGATACCCAGATCATATGAAACAGCATGACTTTTTC	0	48	48	AAGAGTGCCATGC	48	61	13	CC	61	63	2	GAA	63	66	3	GG	66	68	2		68	68	0	GCATGGCACTCTT	68	81	13		81	81	0
49	caatgcttctcgtgatacccagatcatatgaaacagcatgactttttcaagagtgccatgcccgaaggGCATGGCACCCT	3	caatgcttctcgtgatacccagatcatatgaaacagcatgactttttcaaga g gtgccatgccc a CACGGTACGgga TCC	CAATGCTTCTCGTGATACCCAGATCATATGAAACAGCATGACTTTTTCAAGA	0	52	52	GTGCCATGC	52	61	9	CC	61	63	2	GAA	63	66	3	GG	66	68	2		68	68	0	GCATGGCAC	68	77	9	CCT	77	80	3
50	caatgcttctcgtgatacccagatcatatgaaacagcatgactttttcaagagtgccatgcccgaaggTCATGCTGTTTCATATGAT	3	caatgcttctcgtgatacccag tttttcaagagt atcatatgaaacagcatgac g TAGTATACTTTGTCGTACTggaagcccgtacc	CAATGCTTCTCGTGATACCCAG	0	22	22	ATCATATGAAACAGCATGA	22	41	19	C	41	42	1	TTTTTCAAGAGTGCCATGCCCGAAG	42	67	25	G	67	68	1		68	68	0	TCATGCTGTTTCATATGAT	68	87	19		87	87	0
51	caatgcttctcgtgatacccagatcatatgaaacagcatgactttttcaagagtgccatgcccgaaggCAT	3	caatgcttctcgtgatacccagatcatatgaaacagcatgactttttcaagagtgcc c atgcc g TACgg a a	CAATGCTTCTCGTGATACCCAGATCATATGAAACAGCATGACTTTTTCAAGAGTGCC	0	57	57	ATG	57	60	3	CC	60	62	2	CGAA	62	66	4	GG	66	68	2		68	68	0	CAT	68	71	3		71	71	0
52	caatgcttctcgtgatacccagatcatatgaaacagcatgactttttcaagagtgccatgcccgaaggGTATCACGAGAAGCATTGC	3	agatcatatgaaacagcatgac caatgcttctcgtgataccc t GTTACGAAGAGCACTATGgg t C aagcccgtaccgtgagaacttt		0	0	0	CAATGCTTCTCGTGATAC	0	18	18	CC	18	20	2	AGATCATATGAAACAGCATGACTTTTTCAAGAGTGCCATGCCCGAA	20	66	46	GG	66	68	2		68	68	0	GTATCACGAGAAGCATTG	68	86	18	C	86	87	1
53	caatgcttctcgtgatacccagatcatatgaaacagcatgactttttcaagagtgccatgcccgaaggCAC	3	caatgcttctcgtgatacccagatcatatgaaacagcatgactttttcaaga atgc gtgcc c CACggaagc	CAATGCTTCTCGTGATACCCAGATCATATGAAACAGCATGACTTTTTCAAGA	0	52	52	GTG	52	55	3	CC	55	57	2	ATGCCCGAA	57	66	9	GG	66	68	2		68	68	0	CAC	68	71	3		71	71	0
54	caatgcttctcgtgatacccagatcatatgaaacagcatgactttttcaagagtgccatgcccgaaggTCATGCTGTTTCATATGAC	3	caatgcttctcgtgatacccaga tttttcaagagt tcatatgaaacagcatgac g AGTATACTTTGTCGTACTggaagcccgtacc C	CAATGCTTCTCGTGATACCCAGA	0	23	23	TCATATGAAACAGCATGA	23	41	18	C	41	42	1	TTTTTCAAGAGTGCCATGCCCGAAG	42	67	25	G	67	68	1		68	68	0	TCATGCTGTTTCATATGA	68	86	18	C	86	87	1
55	caatgcttctcgtgatacccagatcatatgaaacagcatgactttttcaagagtgccatgcccgaaggTCATGCTGTTTCAA	3	caatgcttctcgtgatacccagatcata tttttcaagagt tgaaacagcatgac g ACTTTGTCGTACTggaagcccgtacc A	CAATGCTTCTCGTGATACCCAGATCATA	0	28	28	TGAAACAGCATGA	28	41	13	C	41	42	1	TTTTTCAAGAGTGCCATGCCCGAAG	42	67	25	G	67	68	1		68	68	0	TCATGCTGTTTCA	68	81	13	A	81	82	1
56	caatgcttctcgtgatacccagatcatatgaaacagcatgactttttcaagagtgccatgcccgaaggGGCATGGCACG	3	caatgcttctcgtgatacccagatcatatgaaacagcatgactttttcaaga g gtgccatgccc a CACGGTACGGg a G g	CAATGCTTCTCGTGATACCCAGATCATATGAAACAGCATGACTTTTTCAAGA	0	52	52	GTGCCATGCC	52	62	10	C	62	63	1	GAAG	63	67	4	G	67	68	1		68	68	0	GGCATGGCAC	68	78	10	G	78	79	1
57	caatgcttctcgtgatacccagatcatatgaaacagcatgactttttcaagagtgccatgcccgaaggCCTGGCACTCTTGAAAAAGTCAT	3	caatgcttctcgtgatacccagatcatatgaaacagc tgccc atgactttttcaagagtgcca g TACTGAAAAAGTTCTCACGGT a CCgga	CAATGCTTCTCGTGATACCCAGATCATATGAAACAGC	0	37	37	ATGACTTTTTCAAGAGTGCCA	37	58	21		58	58	0	TGCCCGAAGG	58	68	10		68	68	0	CC	68	70	2	TGGCACTCTTGAAAAAGTCAT	70	91	21		91	91	0
58	caatgcttctcgtgatacccagatcatatgaaacagcatgactttttcaagagtgccatgcccgaaggGCATGGCACTCT	3	caatgcttctcgtgatacccagatcatatgaaacagcatgactttttca g agagtgccatgccc a TCTCACGGTACGgga	CAATGCTTCTCGTGATACCCAGATCATATGAAACAGCATGACTTTTTCA	0	49	49	AGAGTGCCATGC	49	61	12	CC	61	63	2	GAA	63	66	3	GG	66	68	2		68	68	0	GCATGGCACTCT	68	80	12		80	80	0
59	caatgcttctcgtgatacccagatcatatgaaacagcatgactttttcaagagtgccatgcccgaaggGTCATGCTGTTTCAT	3	caatgcttctcgtgatacccagatcat tttttcaagagt atgaaacagcatgac g TACTTTGTCGTACTG c ggaagcccgtac	CAATGCTTCTCGTGATACCCAGATCAT	0	27	27	ATGAAACAGCATGAC	27	42	15		42	42	0	TTTTTCAAGAGTGCCATGCCCGAAGG	42	68	26		68	68	0		68	68	0	GTCATGCTGTTTCAT	68	83	15		83	83	0
60	caatgcttctcgtgatacccagatcatatgaaacagcatgactttttcaagagtgccatgcccgaaggTCATGCTGT	3	caatgcttctcgtgatacccagatcatatgaa tttttcaagagt acagcatgac g TGTCGTACTggaagcccgtacc	CAATGCTTCTCGTGATACCCAGATCATATGAA	0	32	32	ACAGCATGA	32	41	9	C	41	42	1	TTTTTCAAGAGTGCCATGCCCGAAG	42	67	25	G	67	68	1		68	68	0	TCATGCTGT	68	77	9		77	77	0
61	caatgcttctcgtgatacccagatcatatgaaacagcatgactttttcaagagtgccatgcccgaaggGTATCACGAGAAGCATTGAG	3	agatcatatgaaacagcatgac caatgcttctcgtgataccc t GTTACGAAGAGCACTATGgg t GA aagcccgtaccgtgagaacttt		0	0	0	CAATGCTTCTCGTGATAC	0	18	18	CC	18	20	2	AGATCATATGAAACAGCATGACTTTTTCAAGAGTGCCATGCCCGAA	20	66	46	GG	66	68	2		68	68	0	GTATCACGAGAAGCATTG	68	86	18	AG	86	88	2
62	caatgcttctcgtgatacccagatcatatgaaacagcatgactttttcaagagtgccatgcccgaaggCACTCTTGAAAA	3	caatgcttctcgtgatacccagatcatatgaaacagcatgact atgc ttttcaagagtgcc c AAAAGTTCTCACggaagc	CAATGCTTCTCGTGATACCCAGATCATATGAAACAGCATGACT	0	43	43	TTTTCAAGAGTG	43	55	12	CC	55	57	2	ATGCCCGAA	57	66	9	GG	66	68	2		68	68	0	CACTCTTGAAAA	68	80	12		80	80	0
63	caatgcttctcgtgatacccagatcatatgaaacagcatgactttttcaagagtgccatgcccgaaggGTATCACGAGAAGCATTGAT	3	agatcatatgaaacagcatgac caatgcttctcgtgataccc t GTTACGAAGAGCACTATGgg t TA aagcccgtaccgtgagaacttt		0	0	0	CAATGCTTCTCGTGATAC	0	18	18	CC	18	20	2	AGATCATATGAAACAGCATGACTTTTTCAAGAGTGCCATGCCCGAA	20	66	46	GG	66	68	2		68	68	0	GTATCACGAGAAGCATTG	68	86	18	AT	86	88	2
64	caatgcttctcgtgatacccagatcatatgaaacagcatgactttttcaagagtgccatgcccgaaggCCATGCTGTTTCATATGATCT	3	caatgcttctcgtgataccc actttttcaagagt agatcatatgaaacagcatg g TCTAGTATACTTTGTCGTACCggaagcccgtacc	CAATGCTTCTCGTGATACCC	0	20	20	AGATCATATGAAACAGCATG	20	40	20		40	40	0	ACTTTTTCAAGAGTGCCATGCCCGAAGG	40	68	28		68	68	0	C	68	69	1	CATGCTGTTTCATATGATCT	69	89	20		89	89	0
65	caatgcttctcgtgatacccagatcatatgaaacagcatgactttttcaagagtgccatgcccgaaggCATGGCAC	3	caatgcttctcgtgatacccagatcatatgaaacagcatgactttttcaaga c gtgccatgcc g CACGGTACgg a a	CAATGCTTCTCGTGATACCCAGATCATATGAAACAGCATGACTTTTTCAAGA	0	52	52	GTGCCATG	52	60	8	CC	60	62	2	CGAA	62	66	4	GG	66	68	2		68	68	0	CATGGCAC	68	76	8		76	76	0
66	caatgcttctcgtgatacccagatcatatgaaacagcatgactttttcaagagtgccatgcccgaaggGTATCACGAGAAGCATTGAC	3	agatcatatgaaacagcatgac caatgcttctcgtgataccc t GTTACGAAGAGCACTATGgg t CA aagcccgtaccgtgagaacttt		0	0	0	CAATGCTTCTCGTGATAC	0	18	18	CC	18	20	2	AGATCATATGAAACAGCATGACTTTTTCAAGAGTGCCATGCCCGAA	20	66	46	GG	66	68	2		68	68	0	GTATCACGAGAAGCATTG	68	86	18	AC	86	88	2
67	caatgcttctcgtgatacccagatcatatgaaacagcatgactttttcaagagtgccatgcccgaaggCC	3	caatgcttctcgtgatacccagatcatatgaaacagcatgactttttcaagagtgccatgcccgaag g C C	CAATGCTTCTCGTGATACCCAGATCATATGAAACAGCATGACTTTTTCAAGAGTGCCATGCCCGAAGG	0	68	68		68	68	0		68	68	0		68	68	0		68	68	0		70	70	0		70	70	0		70	70	0
68	caatgcttctcgtgatacccagatcatatgaaacagcatgactttttcaagagtgccatgcccgaaggGGCATGGCACTCC	2	caatgcttctcgtgatacccagatcatatgaaacagcatgactttttcaa g gagtgccatgccc a CTCACGGTACGGg a C g	CAATGCTTCTCGTGATACCCAGATCATATGAAACAGCATGACTTTTTCAA	0	50	50	GAGTGCCATGCC	50	62	12	C	62	63	1	GAAG	63	67	4	G	67	68	1		68	68	0	GGCATGGCACTC	68	80	12	C	80	81	1
69	caatgcttctcgtgatacccagatcatatgaaacagcatgactttttcaagagtgccatgcccgaaggTCATGCTGTTTCATGACCTTCGGGC	2	caatgcttctcgtgatacccagatcat tttttcaagagt atgaaacagcatgac g TACTTTGTCGTACTggaagcccgtacc CGGGCTTCCAG	CAATGCTTCTCGTGATACCCAGATCAT	0	27	27	ATGAAACAGCATGA	27	41	14	C	41	42	1	TTTTTCAAGAGTGCCATGCCCGAAG	42	67	25	G	67	68	1		68	68	0	TCATGCTGTTTCAT	68	82	14	GACCTTCGGGC	82	93	11
70	caatgcttctcgtgatacccagatcatatgaaacagcatgactttttcaagagtgccatgcccgaaggGGCATGGCACTCTTGAAAAAGTC	2	caatgcttctcgtgatacccagatcatatgaaacagcat g gactttttcaagagtgccatgccc a CTGAAAAAGTTCTCACGGTACGGg a g	CAATGCTTCTCGTGATACCCAGATCATATGAAACAGCAT	0	39	39	GACTTTTTCAAGAGTGCCATGCC	39	62	23	C	62	63	1	GAAG	63	67	4	G	67	68	1		68	68	0	GGCATGGCACTCTTGAAAAAGTC	68	91	23		91	91	0
71	caatgcttctcgtgatacccagatcatatgaaacagcatgactttttcaagagtgccatgcccgaaggGCACTCTTGAAAAAGTCATGCT	2	caatgcttctcgtgatacccagatcatatgaaac atgc agcatgactttttcaagagtgcc c TCGTACTGAAAAAGTTCTCACGg c gaag	CAATGCTTCTCGTGATACCCAGATCATATGAAAC	0	34	34	AGCATGACTTTTTCAAGAGTGC	34	56	22	C	56	57	1	ATGCCCGAAG	57	67	10	G	67	68	1		68	68	0	GCACTCTTGAAAAAGTCATGCT	68	90	22		90	90	0
72	caatgcttctcgtgatacccagatcatatgaaacagcatgactttttcaagagtgccatgcccgaaggCATGGCACT	2	caatgcttctcgtgatacccagatcatatgaaacagcatgactttttcaag c agtgccatgcc g TCACGGTACgg a a	CAATGCTTCTCGTGATACCCAGATCATATGAAACAGCATGACTTTTTCAAG	0	51	51	AGTGCCATG	51	60	9	CC	60	62	2	CGAA	62	66	4	GG	66	68	2		68	68	0	CATGGCACT	68	77	9		77	77	0
73	caatgcttctcgtgatacccagatcatatgaaacagcatgactttttcaagagtgccatgcccgaaggGAC	2	caatgcttctcgtgatacccagatcatatgaaacagcatgactttttcaaga gccatgc gt c CAGggaagc	CAATGCTTCTCGTGATACCCAGATCATATGAAACAGCATGACTTTTTCAAGA	0	52	52	GT	52	54	2		54	54	0	GCCATGCCCGAAGG	54	68	14		68	68	0	G	68	69	1	AC	69	71	2		71	71	0
74	caatgcttctcgtgatacccagatcatatgaaacagcatgactttttcaagagtgccatgcccgaaggCACTCTTGAAAT	2	caatgcttctcgtgatacccagatcatatgaaacagcatgactt atgc tttcaagagtgcc c AAAGTTCTCACggaagc T	CAATGCTTCTCGTGATACCCAGATCATATGAAACAGCATGACTT	0	44	44	TTTCAAGAGTG	44	55	11	CC	55	57	2	ATGCCCGAA	57	66	9	GG	66	68	2		68	68	0	CACTCTTGAAA	68	79	11	T	79	80	1
75	caatgcttctcgtgatacccagatcatatgaaacagcatgactttttcaagagtgccatgcccgaaggGTCAAT	2	caatgcttctcgtgatacccagatcatatgaaacagca tttttcaagagt tgac g ACTG c TA ggaagcccgtac	CAATGCTTCTCGTGATACCCAGATCATATGAAACAGCA	0	38	38	TGAC	38	42	4		42	42	0	TTTTTCAAGAGTGCCATGCCCGAAGG	42	68	26		68	68	0		68	68	0	GTCA	68	72	4	AT	72	74	2
76	caatgcttctcgtgatacccagatcatatgaaacagcatgactttttcaagagtgccatgcccgaaggCCTGGCACTCTTGAAAAA	2	caatgcttctcgtgatacccagatcatatgaaacagcatgac tgccc tttttcaagagtgcca g AAAAAGTTCTCACGGT a CCgga	CAATGCTTCTCGTGATACCCAGATCATATGAAACAGCATGAC	0	42	42	TTTTTCAAGAGTGCCA	42	58	16		58	58	0	TGCCCGAAGG	58	68	10		68	68	0	CC	68	70	2	TGGCACTCTTGAAAAA	70	86	16		86	86	0
77	caatgcttctcgtgatacccagatcatatgaaacagcatgactttttcaagagtgccatgcccgaaggTCATGCTGTTTCATA	2	caatgcttctcgtgatacccagatca tttttcaagagt tatgaaacagcatgac g ATACTTTGTCGTACTggaagcccgtacc	CAATGCTTCTCGTGATACCCAGATCA	0	26	26	TATGAAACAGCATGA	26	41	15	C	41	42	1	TTTTTCAAGAGTGCCATGCCCGAAG	42	67	25	G	67	68	1		68	68	0	TCATGCTGTTTCATA	68	83	15		83	83	0
78	caatgcttctcgtgatacccagatcatatgaaacagcatgactttttcaagagtgccatgcccgaaggGCATGGCACAC	2	caatgcttctcgtgatacccagatcatatgaaacagcatgactttttcaaga g gtgccatgccc a CACGGTACGgga CA	CAATGCTTCTCGTGATACCCAGATCATATGAAACAGCATGACTTTTTCAAGA	0	52	52	GTGCCATGC	52	61	9	CC	61	63	2	GAA	63	66	3	GG	66	68	2		68	68	0	GCATGGCAC	68	77	9	AC	77	79	2
79	caatgcttctcgtgatacccagatcatatgaaacagcatgactttttcaagagtgccatgcccgaaggGCATGGCAC	2	caatgcttctcgtgatacccagatcatatgaaacagcatgactttttcaaga g gtgccatgccc a CACGGTACGgga	CAATGCTTCTCGTGATACCCAGATCATATGAAACAGCATGACTTTTTCAAGA	0	52	52	GTGCCATGC	52	61	9	CC	61	63	2	GAA	63	66	3	GG	66	68	2		68	68	0	GCATGGCAC	68	77	9		77	77	0
80	caatgcttctcgtgatacccagatcatatgaaacagcatgactttttcaagagtgccatgcccgaaggCT	2	caatgcttctcgtgatacccagatcatatgaaac atgactttttcaag agc a TCg g gaagcccgtaccgt	CAATGCTTCTCGTGATACCCAGATCATATGAAAC	0	34	34	AG	34	36	2	C	36	37	1	ATGACTTTTTCAAGAGTGCCATGCCCGAAG	37	67	30	G	67	68	1		68	68	0	CT	68	70	2		70	70	0
81	caatgcttctcgtgatacccagatcatatgaaacagcatgactttttcaagagtgccatgcccgaaggGCACTCTTGAAAAAGTCAT	2	caatgcttctcgtgatacccagatcatatgaaacagc atgc atgactttttcaagagtgcc c TACTGAAAAAGTTCTCACGg c gaag	CAATGCTTCTCGTGATACCCAGATCATATGAAACAGC	0	37	37	ATGACTTTTTCAAGAGTGC	37	56	19	C	56	57	1	ATGCCCGAAG	57	67	10	G	67	68	1		68	68	0	GCACTCTTGAAAAAGTCAT	68	87	19		87	87	0
82	caatgcttctcgtgatacccagatcatatgaaacagcatgactttttcaagagtgccatgcccgaaggGTATCACGAGAAGCATTGT	2	agatcatatgaaacagcatgac caatgcttctcgtgataccc t GTTACGAAGAGCACTATGgg t T aagcccgtaccgtgagaacttt		0	0	0	CAATGCTTCTCGTGATAC	0	18	18	CC	18	20	2	AGATCATATGAAACAGCATGACTTTTTCAAGAGTGCCATGCCCGAA	20	66	46	GG	66	68	2		68	68	0	GTATCACGAGAAGCATTG	68	86	18	T	86	87	1
83	caatgcttctcgtgatacccagatcatatgaaacagcatgactttttcaagagtgccatgcccgaaggCACTCTTGAAAAAGTCAAT	2	caatgcttctcgtgatacccagatcatatgaaacagca atgc tgactttttcaagagtgcc c ACTGAAAAAGTTCTCACggaagc TA	CAATGCTTCTCGTGATACCCAGATCATATGAAACAGCA	0	38	38	TGACTTTTTCAAGAGTG	38	55	17	CC	55	57	2	ATGCCCGAA	57	66	9	GG	66	68	2		68	68	0	CACTCTTGAAAAAGTCA	68	85	17	AT	85	87	2
84	caatgcttctcgtgatacccagatcatatgaaacagcatgactttttcaagagtgccatgcccgaaggGCATGGCAT	2	caatgcttctcgtgatacccagatcatatgaaacagcatgactttttcaagag g tgccatgccc a ACGGTACGgga T	CAATGCTTCTCGTGATACCCAGATCATATGAAACAGCATGACTTTTTCAAGAG	0	53	53	TGCCATGC	53	61	8	CC	61	63	2	GAA	63	66	3	GG	66	68	2		68	68	0	GCATGGCA	68	76	8	T	76	77	1
85	caatgcttctcgtgatacccagatcatatgaaacagcatgactttttcaagagtgccatgcccgaaggCCCTCTTGAAAAAGTCATGCTGTTTCATAT	2	caatgcttctcgtgatacccagatc tgccatgc atatgaaacagcatgactttttcaagag c TATACTTTGTCGTACTGAAAAAGTTCTCCCggaagc	CAATGCTTCTCGTGATACCCAGATC	0	25	25	ATATGAAACAGCATGACTTTTTCAAGAG	25	53	28		53	53	0	TGCCATGCCCGAAGG	53	68	15		68	68	0	CC	68	70	2	CTCTTGAAAAAGTCATGCTGTTTCATAT	70	98	28		98	98	0
86	caatgcttctcgtgatacccagatcatatgaaacagcatgactttttcaagagtgccatgcccgaaggCCATGCTGTTTCATATGAAACAGCATGGCCTTC	2	caatgcttctcgtgatacccaga actttttcaagagt tcatatgaaacagcatg g AGTATACTTTGTCGTACCggaagcccgtacc CTTCCGGTACGACAA	CAATGCTTCTCGTGATACCCAGA	0	23	23	TCATATGAAACAGCATG	23	40	17		40	40	0	ACTTTTTCAAGAGTGCCATGCCCGAAGG	40	68	28		68	68	0	C	68	69	1	CATGCTGTTTCATATGA	69	86	17	AACAGCATGGCCTTC	86	101	15
87	caatgcttctcgtgatacccagatcatatgaaacagcatgactttttcaagagtgccatgcccgaaggGCATGGCACTCTTGAAAAG	2	caatgcttctcgtgatacccagatcatatgaaacagcatgact g ttttcaagagtgccatgccc a AAAAGTTCTCACGGTACGgga G	CAATGCTTCTCGTGATACCCAGATCATATGAAACAGCATGACT	0	43	43	TTTTCAAGAGTGCCATGC	43	61	18	CC	61	63	2	GAA	63	66	3	GG	66	68	2		68	68	0	GCATGGCACTCTTGAAAA	68	86	18	G	86	87	1
88	caatgcttctcgtgatacccagatcatatgaaacagcatgactttttcaagagtgccatgcccgaaggCATGGCACTCTTGAAAAA	2	caatgcttctcgtgatacccagatcatatgaaacagcatgac c tttttcaagagtgccatgcc g AAAAAGTTCTCACGGTACgg a a	CAATGCTTCTCGTGATACCCAGATCATATGAAACAGCATGAC	0	42	42	TTTTTCAAGAGTGCCATG	42	60	18	CC	60	62	2	CGAA	62	66	4	GG	66	68	2		68	68	0	CATGGCACTCTTGAAAAA	68	86	18		86	86	0
89	caatgcttctcgtgatacccagatcatatgaaacagcatgactttttcaagagtgccatgcccgaaggGCATGGCGC	2	caatgcttctcgtgatacccagatcatatgaaacagcatgactttttcaagagt g gccatgccc a CGGTACGgga CG	CAATGCTTCTCGTGATACCCAGATCATATGAAACAGCATGACTTTTTCAAGAGT	0	54	54	GCCATGC	54	61	7	CC	61	63	2	GAA	63	66	3	GG	66	68	2		68	68	0	GCATGGC	68	75	7	GC	75	77	2
90	caatgcttctcgtgatacccagatcatatgaaacagcatgactttttcaagagtgccatgcccgaaggCATGGCACTCA	2	caatgcttctcgtgatacccagatcatatgaaacagcatgactttttcaa c gagtgccatgcc g CTCACGGTACgg a A a	CAATGCTTCTCGTGATACCCAGATCATATGAAACAGCATGACTTTTTCAA	0	50	50	GAGTGCCATG	50	60	10	CC	60	62	2	CGAA	62	66	4	GG	66	68	2		68	68	0	CATGGCACTC	68	78	10	A	78	79	1
91	caatgcttctcgtgatacccagatcatatgaaacagcatgactttttcaagagtgccatgcccgaaggCCATGCTGTTTCATGGCCTTCGGGCAT	2	caatgcttctcgtgatacccagatcat actttttcaagagt atgaaacagcatg g TACTTTGTCGTACCggaagcccgtacc TACGGGCTTCCGG	CAATGCTTCTCGTGATACCCAGATCAT	0	27	27	ATGAAACAGCATG	27	40	13		40	40	0	ACTTTTTCAAGAGTGCCATGCCCGAAGG	40	68	28		68	68	0	C	68	69	1	CATGCTGTTTCAT	69	82	13	GGCCTTCGGGCAT	82	95	13
92	caatgcttctcgtgatacccagatcatatgaaacagcatgactttttcaagagtgccatgcccgaaggCCATGCTGT	2	caatgcttctcgtgatacccagatcatatgaa actttttcaagagt acagcatg g TGTCGTACCggaagcccgtacc	CAATGCTTCTCGTGATACCCAGATCATATGAA	0	32	32	ACAGCATG	32	40	8		40	40	0	ACTTTTTCAAGAGTGCCATGCCCGAAGG	40	68	28		68	68	0	C	68	69	1	CATGCTGT	69	77	8		77	77	0
93	caatgcttctcgtgatacccagatcatatgaaacagcatgactttttcaagagtgccatgcccgaaggCAATGCT	2	caatgcttctcgtgatacccagatcatatgaaacagcatgactttttcaagagtgcca c tgcc g ACgg a TCGTA a	CAATGCTTCTCGTGATACCCAGATCATATGAAACAGCATGACTTTTTCAAGAGTGCCA	0	58	58	TG	58	60	2	CC	60	62	2	CGAA	62	66	4	GG	66	68	2		68	68	0	CA	68	70	2	ATGCT	70	75	5
94	caatgcttctcgtgatacccagatcatatgaaacagcatgactttttcaagagtgccatgcccgaaggGCATGGCA	2	caatgcttctcgtgatacccagatcatatgaaacagcatgactttttcaagag g tgccatgccc a ACGGTACGgga	CAATGCTTCTCGTGATACCCAGATCATATGAAACAGCATGACTTTTTCAAGAG	0	53	53	TGCCATGC	53	61	8	CC	61	63	2	GAA	63	66	3	GG	66	68	2		68	68	0	GCATGGCA	68	76	8		76	76	0
95	caatgcttctcgtgatacccagatcatatgaaacagcatgactttttcaagagtgccatgcccgaaggAAT	2	caatgcttctcgtgatacccagatcatatgaaacagcatgactttttcaagagtgcc gccc at g TA a Agga	CAATGCTTCTCGTGATACCCAGATCATATGAAACAGCATGACTTTTTCAAGAGTGCC	0	57	57	AT	57	59	2		59	59	0	GCCCGAAGG	59	68	9		68	68	0	A	68	69	1	AT	69	71	2		71	71	0
96	caatgcttctcgtgatacccagatcatatgaaacagcatgactttttcaagagtgccatgcccgaaggCACTCTTGAAAAAGTGCCTTCGGGCAT	2	caatgcttctcgtgatacccagatcatatgaaacagcatg atgc actttttcaagagtgcc c TGAAAAAGTTCTCACggaagc TACGGGCTTCCG	CAATGCTTCTCGTGATACCCAGATCATATGAAACAGCATG	0	40	40	ACTTTTTCAAGAGTG	40	55	15	CC	55	57	2	ATGCCCGAA	57	66	9	GG	66	68	2		68	68	0	CACTCTTGAAAAAGT	68	83	15	GCCTTCGGGCAT	83	95	12
97	caatgcttctcgtgatacccagatcatatgaaacagcatgactttttcaagagtgccatgcccgaaggCCACTCTTGAAAAAGTCATGCTGT	2	caatgcttctcgtgatacccagatcatatgaa atgc acagcatgactttttcaagagtg-cc c TGTCGTACTGAAAAAGTTCTCACCggaagc	CAATGCTTCTCGTGATACCCAGATCATATGAA	0	32	32	ACAGCATGACTTTTTCAAGAGTG	32	55	23	CC	55	57	2	ATGCCCGAA	57	66	9	GG	66	68	2	C	68	69	1	CACTCTTGAAAAAGTCATGCTGT	69	92	23		92	92	0
98	caatgcttctcgtgatacccagatcatatgaaacagcatgactttttcaagagtgccatgcccgaaggTCATGCTGTTTCATATGATCTGGGTATCAC	2	caatgcttctc tttttcaagagt gtgatacccagatcatatgaaacagcatgac g CACTATGGGTCTAGTATACTTTGTCGTACTggaagcccgtacc	CAATGCTTCTC	0	11	11	GTGATACCCAGATCATATGAAACAGCATGA	11	41	30	C	41	42	1	TTTTTCAAGAGTGCCATGCCCGAAG	42	67	25	G	67	68	1		68	68	0	TCATGCTGTTTCATATGATCTGGGTATCAC	68	98	30		98	98	0
99	caatgcttctcgtgatacccagatcatatgaaacagcatgactttttcaagagtgccatgcccgaaggGCATGGCACTCTTGAAAAAGTCATGCT	2	caatgcttctcgtgatacccagatcatatgaaac g agcatgactttttcaagagtgccatgccc a TCGTACTGAAAAAGTTCTCACGGTACGgga	CAATGCTTCTCGTGATACCCAGATCATATGAAAC	0	34	34	AGCATGACTTTTTCAAGAGTGCCATGC	34	61	27	CC	61	63	2	GAA	63	66	3	GG	66	68	2		68	68	0	GCATGGCACTCTTGAAAAAGTCATGCT	68	95	27		95	95	0
100	caatgcttctcgtgatacccagatcatatgaaacagcatgactttttcaagagtgccatgcccgaaggGCAC	2	caatgcttctcgtgatacccagatcatatgaaacagcatgactttttcaaga atgc gtgcc c CACGg c gaag	CAATGCTTCTCGTGATACCCAGATCATATGAAACAGCATGACTTTTTCAAGA	0	52	52	GTGC	52	56	4	C	56	57	1	ATGCCCGAAG	57	67	10	G	67	68	1		68	68	0	GCAC	68	72	4		72	72	0
101	caatgcttctcgtgatacccagatcatatgaaacagcatgactttttcaagagtgccatgcccgaaggGAGAAGC	2	caat gtgatacccagatcatatgaaacagcat gcttctc g CGAAGAGggaagcccgtaccgtgagaactttttca	CAAT	0	4	4	GCTTCTC	4	11	7		11	11	0	GTGATACCCAGATCATATGAAACAGCATGACTTTTTCAAGAGTGCCATGCCCGAAGG	11	68	57		68	68	0		68	68	0	GAGAAGC	68	75	7		75	75	0
102	caatgcttctcgtgatacccagatcatatgaaacagcatgactttttcaagagtgccatgcccgaaggCATGGCACTCT	2	caatgcttctcgtgatacccagatcatatgaaacagcatgactttttca c agagtgccatgcc g TCTCACGGTACgg a a	CAATGCTTCTCGTGATACCCAGATCATATGAAACAGCATGACTTTTTCA	0	49	49	AGAGTGCCATG	49	60	11	CC	60	62	2	CGAA	62	66	4	GG	66	68	2		68	68	0	CATGGCACTCT	68	79	11		79	79	0
103	caatgcttctcgtgatacccagatcatatgaaacagcatgactttttcaagagtgccatgcccgaaggAC	2	caatgcttctcgtgatacccagatcatatgaaacagcatgactttttcaagagtgccatgcccgaag g A C	CAATGCTTCTCGTGATACCCAGATCATATGAAACAGCATGACTTTTTCAAGAGTGCCATGCCCGAAGG	0	68	68		68	68	0		68	68	0		68	68	0		68	68	0		70	70	0		70	70	0		70	70	0
104	caatgcttctcgtgatacccagatcatatgaaacagcatgactttttcaagagtgccatgcccgaaggCACTCTTGAAAAAGTCA	2	caatgcttctcgtgatacccagatcatatgaaacagca atgc tgactttttcaagagtgcc c ACTGAAAAAGTTCTCACggaagc	CAATGCTTCTCGTGATACCCAGATCATATGAAACAGCA	0	38	38	TGACTTTTTCAAGAGTG	38	55	17	CC	55	57	2	ATGCCCGAA	57	66	9	GG	66	68	2		68	68	0	CACTCTTGAAAAAGTCA	68	85	17		85	85	0
105	caatgcttctcgtgatacccagatcatatgaaacagcatgactttttcaagagtgccatgcccgaaggGCATT	2	caatgcttctcgtgatacccagatcatatgaaacagcatgactttttcaagagtgcc g atgccc a TACGgga T	CAATGCTTCTCGTGATACCCAGATCATATGAAACAGCATGACTTTTTCAAGAGTGCC	0	57	57	ATGC	57	61	4	CC	61	63	2	GAA	63	66	3	GG	66	68	2		68	68	0	GCAT	68	72	4	T	72	73	1
106	caatgcttctcgtgatacccagatcatatgaaacagcatgactttttcaagagtgccatgcccgaaggTCATGCTGTTTCATGACCTTCGGGCATA	2	caatgcttctcgtgatacccagatcat tttttcaagagt atgaaacagcatgac g TACTTTGTCGTACTggaagcccgtacc ATACGGGCTTCCAG	CAATGCTTCTCGTGATACCCAGATCAT	0	27	27	ATGAAACAGCATGA	27	41	14	C	41	42	1	TTTTTCAAGAGTGCCATGCCCGAAG	42	67	25	G	67	68	1		68	68	0	TCATGCTGTTTCAT	68	82	14	GACCTTCGGGCATA	82	96	14
107	caatgcttctcgtgatacccagatcatatgaaacagcatgactttttcaagagtgccatgcccgaaggCAA	2	caatgcttctcgtgatacccagatcatatgaaacagcatgactttttcaagagtgcca c tgcc g ACgg a A a	CAATGCTTCTCGTGATACCCAGATCATATGAAACAGCATGACTTTTTCAAGAGTGCCA	0	58	58	TG	58	60	2	CC	60	62	2	CGAA	62	66	4	GG	66	68	2		68	68	0	CA	68	70	2	A	70	71	1
108	caatgcttctcgtgatacccagatcatatgaaacagcatgactttttcaagagtgccatgcccgaaggGGCATGGCACTCTTGAAAAAGT	2	caatgcttctcgtgatacccagatcatatgaaacagcatg g actttttcaagagtgccatgccc a TGAAAAAGTTCTCACGGTACGGg a g	CAATGCTTCTCGTGATACCCAGATCATATGAAACAGCATG	0	40	40	ACTTTTTCAAGAGTGCCATGCC	40	62	22	C	62	63	1	GAAG	63	67	4	G	67	68	1		68	68	0	GGCATGGCACTCTTGAAAAAGT	68	90	22		90	90	0
109	caatgcttctcgtgatacccagatcatatgaaacagcatgactttttcaagagtgccatgcccgaaggGCATGGCACTCTTGAT	2	caatgcttctcgtgatacccagatcatatgaaacagcatgactttt g tcaagagtgccatgccc a AGTTCTCACGGTACGgga T	CAATGCTTCTCGTGATACCCAGATCATATGAAACAGCATGACTTTT	0	46	46	TCAAGAGTGCCATGC	46	61	15	CC	61	63	2	GAA	63	66	3	GG	66	68	2		68	68	0	GCATGGCACTCTTGA	68	83	15	T	83	84	1
110	caatgcttctcgtgatacccagatcatatgaaacagcatgactttttcaagagtgccatgcccgaaggCACTCTTGAAAGTCATGCTGT	2	caatgcttctcgtgatacccagatcatatgaaacagcatgactt atgc tttcaagagtgcc c AAAGTTCTCACggaagc TGTCGTACTG	CAATGCTTCTCGTGATACCCAGATCATATGAAACAGCATGACTT	0	44	44	TTTCAAGAGTG	44	55	11	CC	55	57	2	ATGCCCGAA	57	66	9	GG	66	68	2		68	68	0	CACTCTTGAAA	68	79	11	GTCATGCTGT	79	89	10
111	caatgcttctcgtgatacccagatcatatgaaacagcatgactttttcaagagtgccatgcccgaaggCCATGCTGTTTCATATGAAACAGCATGGCAC	1	caatgcttctcgtgatacccaga actttttcaagagt tcatatgaaacagcatg g AGTATACTTTGTCGTACCggaagcccgtacc CACGGTACGACAA	CAATGCTTCTCGTGATACCCAGA	0	23	23	TCATATGAAACAGCATG	23	40	17		40	40	0	ACTTTTTCAAGAGTGCCATGCCCGAAGG	40	68	28		68	68	0	C	68	69	1	CATGCTGTTTCATATGA	69	86	17	AACAGCATGGCAC	86	99	13
112	caatgcttctcgtgatacccagatcatatgaaacagcatgactttttcaagagtgccatgcccgaaggGCATGGCACTCTTC	1	caatgcttctcgtgatacccagatcatatgaaacagcatgactttttc g aagagtgccatgccc a TTCTCACGGTACGgga C	CAATGCTTCTCGTGATACCCAGATCATATGAAACAGCATGACTTTTTC	0	48	48	AAGAGTGCCATGC	48	61	13	CC	61	63	2	GAA	63	66	3	GG	66	68	2		68	68	0	GCATGGCACTCTT	68	81	13	C	81	82	1
113	caatgcttctcgtgatacccagatcatatgaaacagcatgactttttcaagagtgccatgcccgaaggAAACAGCTTCGGGCATGG	1	caatgcttctcgtgatacccagatcatatgaaacagcatgactt aagagtgcc tttc a AAAggaagcccgt GGTACGGGCTTCGAC	CAATGCTTCTCGTGATACCCAGATCATATGAAACAGCATGACTT	0	44	44	TTT	44	47	3	C	47	48	1	AAGAGTGCCATGCCCGAAG	48	67	19	G	67	68	1		68	68	0	AAA	68	71	3	CAGCTTCGGGCATGG	71	86	15
114	caatgcttctcgtgatacccagatcatatgaaacagcatgactttttcaagagtgccatgcccgaaggCCTGGCACTCTTGAAAAAGTC	1	caatgcttctcgtgatacccagatcatatgaaacagcat tgccc gactttttcaagagtgcca g CTGAAAAAGTTCTCACGGT a CCgga	CAATGCTTCTCGTGATACCCAGATCATATGAAACAGCAT	0	39	39	GACTTTTTCAAGAGTGCCA	39	58	19		58	58	0	TGCCCGAAGG	58	68	10		68	68	0	CC	68	70	2	TGGCACTCTTGAAAAAGTC	70	89	19		89	89	0
115	caatgcttctcgtgatacccagatcatatgaaacagcatgactttttcaagagtgccatgcccgaaggCCATGCTGTTTCATATGGCCTTCGGGCATGGC	1	caatgcttctcgtgatacccagat actttttcaagagt catatgaaacagcatg g GTATACTTTGTCGTACCggaagcccgtacc CGGTACGGGCTTCCG	CAATGCTTCTCGTGATACCCAGAT	0	24	24	CATATGAAACAGCATG	24	40	16		40	40	0	ACTTTTTCAAGAGTGCCATGCCCGAAGG	40	68	28		68	68	0	C	68	69	1	CATGCTGTTTCATATG	69	85	16	GCCTTCGGGCATGGC	85	100	15
116	caatgcttctcgtgatacccagatcatatgaaacagcatgactttttcaagagtgccatgcccgaaggGTATGTTCCCTTCGGGCATTGG	1	caatgcttctcgtgatacccagatcatatgaaacagcatgactttttcaagagtgcc GTA atgcccgaagg T TACGGGCTTCC G GGT CTT	CAATGCTTCTCGTGATACCCAGATCATATGAAACAGCATGACTTTTTCAAGAGTGCC	0	57	57	ATGCCCGAAGG	57	68	11		68	68	0		68	68	0		68	68	0	GTATGTTC	68	76	8	CCTTCGGGCAT	76	87	11	TGG	87	90	3
117	caatgcttctcgtgatacccagatcatatgaaacagcatgactttttcaagagtgccatgcccgaaggGTATCACGAGAAGCAA	1	caa agatcatatgaaacagcatgac tgcttctcgtgataccc t ACGAAGAGCACTATGgg t A aagcccgtaccgtgagaacttt	CAA	0	3	3	TGCTTCTCGTGATAC	3	18	15	CC	18	20	2	AGATCATATGAAACAGCATGACTTTTTCAAGAGTGCCATGCCCGAA	20	66	46	GG	66	68	2		68	68	0	GTATCACGAGAAGCA	68	83	15	A	83	84	1
118	caatgcttctcgtgatacccagatcatatgaaacagcatgactttttcaagagtgccatgcccgaaggCATGGCACTCTAGAAAAAGTCAT	1	caatgcttctcgtgatacccagatcatatgaaacagcatgactttttca c agagtgccatgcc g TCTCACGGTACgg a TACTGAAAAAGA a	CAATGCTTCTCGTGATACCCAGATCATATGAAACAGCATGACTTTTTCA	0	49	49	AGAGTGCCATG	49	60	11	CC	60	62	2	CGAA	62	66	4	GG	66	68	2		68	68	0	CATGGCACTCT	68	79	11	AGAAAAAGTCAT	79	91	12
119	caatgcttctcgtgatacccagatcatatgaaacagcatgactttttcaagagtgccatgcccgaaggCACTCTTGAAAAAGAC	1	caatgcttctcgtgatacccagatcatatgaaacagcatga atgc ctttttcaagagtgcc c GAAAAAGTTCTCACggaagc CA	CAATGCTTCTCGTGATACCCAGATCATATGAAACAGCATGA	0	41	41	CTTTTTCAAGAGTG	41	55	14	CC	55	57	2	ATGCCCGAA	57	66	9	GG	66	68	2		68	68	0	CACTCTTGAAAAAG	68	82	14	AC	82	84	2
120	caatgcttctcgtgatacccagatcatatgaaacagcatgactttttcaagagtgccatgcccgaaggCATGGCACTCAG	1	caatgcttctcgtgatacccagatcatatgaaacagcatgactttttcaa c gagtgccatgcc g CTCACGGTACgg a GA a	CAATGCTTCTCGTGATACCCAGATCATATGAAACAGCATGACTTTTTCAA	0	50	50	GAGTGCCATG	50	60	10	CC	60	62	2	CGAA	62	66	4	GG	66	68	2		68	68	0	CATGGCACTC	68	78	10	AG	78	80	2
121	caatgcttctcgtgatacccagatcatatgaaacagcatgactttttcaagagtgccatgcccgaaggGTATCACGA	1	caatgcttc agatcatatgaaacagcatgac tcgtgataccc t AGCACTATGgg t aagcccgtaccgtgagaacttt	CAATGCTTC	0	9	9	TCGTGATAC	9	18	9	CC	18	20	2	AGATCATATGAAACAGCATGACTTTTTCAAGAGTGCCATGCCCGAA	20	66	46	GG	66	68	2		68	68	0	GTATCACGA	68	77	9		77	77	0
122	caatgcttctcgtgatacccagatcatatgaaacagcatgactttttcaagagtgccatgcccgaaggGCATGGCACTCTTGAAA	1	caatgcttctcgtgatacccagatcatatgaaacagcatgactt g tttcaagagtgccatgccc a AAAGTTCTCACGGTACGgga	CAATGCTTCTCGTGATACCCAGATCATATGAAACAGCATGACTT	0	44	44	TTTCAAGAGTGCCATGC	44	61	17	CC	61	63	2	GAA	63	66	3	GG	66	68	2		68	68	0	GCATGGCACTCTTGAAA	68	85	17		85	85	0
123	caatgcttctcgtgatacccagatcatatgaaacagcatgactttttcaagagtgccatgcccgaaggGCATTGGCACTCTTGAAAAA	1	caatgcttctcgtgatacccagatcatatgaaacagcatgac tgcccg tttttcaagagtgcca a AAAAAGTTCTCACGGT a TACGgg	CAATGCTTCTCGTGATACCCAGATCATATGAAACAGCATGAC	0	42	42	TTTTTCAAGAGTGCCA	42	58	16		58	58	0	TGCCCGAAGG	58	68	10		68	68	0	GCAT	68	72	4	TGGCACTCTTGAAAAA	72	88	16		88	88	0
124	caatgcttctcgtgatacccagatcatatgaaacagcatgactttttcaagagtgccatgcccgaaggCAATGC	1	caatgcttctcgtgatacccagatcatatgaaacagcatgactttttcaagagtgcca c tgcc g ACgg a CGTA a	CAATGCTTCTCGTGATACCCAGATCATATGAAACAGCATGACTTTTTCAAGAGTGCCA	0	58	58	TG	58	60	2	CC	60	62	2	CGAA	62	66	4	GG	66	68	2		68	68	0	CA	68	70	2	ATGC	70	74	4
125	caatgcttctcgtgatacccagatcatatgaaacagcatgactttttcaagagtgccatgcccgaaggGTATCACCCTTCGGGCATGGC	1	caatgcttctcgtgatacccagatcatatgaaacagcatgactttttcaagagt GTA gccatgcccgaagg T CGGTACGGGCTTCCCAC	CAATGCTTCTCGTGATACCCAGATCATATGAAACAGCATGACTTTTTCAAGAGT	0	54	54	GCCATGCCCGAAGG	54	68	14		68	68	0		68	68	0		68	68	0	GTATCAC	68	75	7	CCTTCGGGCATGGC	75	89	14		89	89	0
126	caatgcttctcgtgatacccagatcatatgaaacagcatgactttttcaagagtgccatgcccgaaggATCTGTTTCA	1	caatgcttctcgtgatacc atatgaaacagcatgacttt cagatc t GTCTAg t ACTTT gaagcccgtaccgtgagaac	CAATGCTTCTCGTGATACC	0	19	19	CAGAT	19	24	5	C	24	25	1	ATATGAAACAGCATGACTTTTTCAAGAGTGCCATGCCCGAAG	25	67	42	G	67	68	1		68	68	0	ATCTG	68	73	5	TTTCA	73	78	5
127	caatgcttctcgtgatacccagatcatatgaaacagcatgactttttcaagagtgccatgcccgaaggCACTCTTGAAAC	1	caatgcttctcgtgatacccagatcatatgaaacagcatgactt atgc tttcaagagtgcc c AAAGTTCTCACggaagc C	CAATGCTTCTCGTGATACCCAGATCATATGAAACAGCATGACTT	0	44	44	TTTCAAGAGTG	44	55	11	CC	55	57	2	ATGCCCGAA	57	66	9	GG	66	68	2		68	68	0	CACTCTTGAAA	68	79	11	C	79	80	1
128	caatgcttctcgtgatacccagatcatatgaaacagcatgactttttcaagagtgccatgcccgaaggGTATCACGAGAAGA	1	caatg agatcatatgaaacagcatgac cttctcgtgataccc t GAAGAGCACTATGgg t A aagcccgtaccgtgagaacttt	CAATG	0	5	5	CTTCTCGTGATAC	5	18	13	CC	18	20	2	AGATCATATGAAACAGCATGACTTTTTCAAGAGTGCCATGCCCGAA	20	66	46	GG	66	68	2		68	68	0	GTATCACGAGAAG	68	81	13	A	81	82	1
129	caatgcttctcgtgatacccagatcatatgaaacagcatgactttttcaagagtgccatgcccgaaggGCCAT	1	caatgcttctcgtgatacccagatcatatgaaacagcatgactttttcaagagtgccat g gccc a CGgga TAC	CAATGCTTCTCGTGATACCCAGATCATATGAAACAGCATGACTTTTTCAAGAGTGCCAT	0	59	59	GC	59	61	2	CC	61	63	2	GAA	63	66	3	GG	66	68	2		68	68	0	GC	68	70	2	CAT	70	73	3
130	caatgcttctcgtgatacccagatcatatgaaacagcatgactttttcaagagtgccatgcccgaaggCCTCTTGAAAAAGAGGCCTTCGGGCAT	1	caatgcttctcgtgatacccagatcatatgaaacagcatga tgccatg ctttttcaagag c GAAAAAGTTCTC c TACGGGCTTCCGGA Cggaagc	CAATGCTTCTCGTGATACCCAGATCATATGAAACAGCATGA	0	41	41	CTTTTTCAAGAG	41	53	12		53	53	0	TGCCATGCCCGAAGG	53	68	15		68	68	0	C	68	69	1	CTCTTGAAAAAG	69	81	12	AGGCCTTCGGGCAT	81	95	14
131	caatgcttctcgtgatacccagatcatatgaaacagcatgactttttcaagagtgccatgcccgaaggATTGA	1	gcttctcgtgatacccagatcatatgaaaca caat g GTTA c A ggaagcccgtaccgtgagaactttttcagta		0	0	0	CAAT	0	4	4		4	4	0	GCTTCTCGTGATACCCAGATCATATGAAACAGCATGACTTTTTCAAGAGTGCCATGCCCGAAGG	4	68	64		68	68	0		68	68	0	ATTG	68	72	4	A	72	73	1
132	caatgcttctcgtgatacccagatcatatgaaacagcatgactttttcaagagtgccatgcccgaaggCCCTCTTGAAAAAGTAGGGCCTTCGGGCAT	1	caatgcttctcgtgatacccagatcatatgaaacagcatg tgccatgc actttttcaagag c TGAAAAAGTTCTCCCggaagc TACGGGCTTCCGGGA	CAATGCTTCTCGTGATACCCAGATCATATGAAACAGCATG	0	40	40	ACTTTTTCAAGAG	40	53	13		53	53	0	TGCCATGCCCGAAGG	53	68	15		68	68	0	CC	68	70	2	CTCTTGAAAAAGT	70	83	13	AGGGCCTTCGGGCAT	83	98	15
133	caatgcttctcgtgatacccagatcatatgaaacagcatgactttttcaagagtgccatgcccgaaggGCATGGCATTCTTGAAAAAGTCATGCT	1	caatgcttctcgtgatacccagatcatatgaaacagcatgactttttcaagag g tgccatgccc a ACGGTACGgga TCGTACTGAAAAAGTTCTT	CAATGCTTCTCGTGATACCCAGATCATATGAAACAGCATGACTTTTTCAAGAG	0	53	53	TGCCATGC	53	61	8	CC	61	63	2	GAA	63	66	3	GG	66	68	2		68	68	0	GCATGGCA	68	76	8	TTCTTGAAAAAGTCATGCT	76	95	19
134	caatgcttctcgtgatacccagatcatatgaaacagcatgactttttcaagagtgccatgcccgaaggTATCACGAGAAGCACTGA	1	caa cagatcatatgaaacagcatgac tgcttctcgtgatacc t ACGAAGAGCACTATggaagcccgtaccgtgagaactttt AGTC	CAA	0	3	3	TGCTTCTCGTGATA	3	17	14	CC	17	19	2	CAGATCATATGAAACAGCATGACTTTTTCAAGAGTGCCATGCCCGAA	19	66	47	GG	66	68	2		68	68	0	TATCACGAGAAGCA	68	82	14	CTGA	82	86	4
135	caatgcttctcgtgatacccagatcatatgaaacagcatgactttttcaagagtgccatgcccgaaggCACTCTTGAAAAAGTCATGCTGTGCTTTTTCAAGAGTGC	1	caatgcttctcgtgatacccagatcatatgaa atgc acagcatgactttttcaagagtgcc c TGTCGTACTGAAAAAGTTCTCACggaagc CGTGAGAACTTTTTCG	CAATGCTTCTCGTGATACCCAGATCATATGAA	0	32	32	ACAGCATGACTTTTTCAAGAGTG	32	55	23	CC	55	57	2	ATGCCCGAA	57	66	9	GG	66	68	2		68	68	0	CACTCTTGAAAAAGTCATGCTGT	68	91	23	GCTTTTTCAAGAGTGC	91	107	16
136	caatgcttctcgtgatacccagatcatatgaaacagcatgactttttcaagagtgccatgcccgaaggCATTGACACTCTTGAAAAAGAGTGTCAATGC	1	ttctcgtgatacccagatcatatgaaacag caatgc c GTTACggaagcccgtaccgtgagaactttttcagta CGTAACTGTGAGAAAAAGTTCTCACA		0	0	0	CAATG	0	5	5	C	5	6	1	TTCTCGTGATACCCAGATCATATGAAACAGCATGACTTTTTCAAGAGTGCCATGCCCGAAG	6	67	61	G	67	68	1		68	68	0	CATTG	68	73	5	ACACTCTTGAAAAAGAGTGTCAATGC	73	99	26
137	caatgcttctcgtgatacccagatcatatgaaacagcatgactttttcaagagtgccatgcccgaaggGCTGTTTCC	1	caatgcttctcgtgatacccagatcatat atgactttttcaaga gaaacagc g CTTTGTCGggaagcccgtaccgt C	CAATGCTTCTCGTGATACCCAGATCATAT	0	29	29	GAAACAGC	29	37	8		37	37	0	ATGACTTTTTCAAGAGTGCCATGCCCGAAGG	37	68	31		68	68	0		68	68	0	GCTGTTTC	68	76	8	C	76	77	1
138	caatgcttctcgtgatacccagatcatatgaaacagcatgactttttcaagagtgccatgcccgaaggGATCGGGCATGGCACTTCGGGCATA	1	caatgcttctcgtgatacccagatcatatgaaacagcatgactttttcaag ag agtgccatgcccga g TCACGGTACGGGCTAG ATACGGGCT	CAATGCTTCTCGTGATACCCAGATCATATGAAACAGCATGACTTTTTCAAG	0	51	51	AGTGCCATGCCCGA	51	65	14		65	65	0	AGG	65	68	3		68	68	0	GA	68	70	2	TCGGGCATGGCACT	70	84	14	TCGGGCATA	84	93	9
139	caatgcttctcgtgatacccagatcatatgaaacagcatgactttttcaagagtgccatgcccgaaggGCAATGCTTCTCA	1	caatgcttctcgtgatacccagatcatatgaaacagcatgactttttcaagagtgcca g tgccc a ACGgga ACTCTTCGTA	CAATGCTTCTCGTGATACCCAGATCATATGAAACAGCATGACTTTTTCAAGAGTGCCA	0	58	58	TGC	58	61	3	CC	61	63	2	GAA	63	66	3	GG	66	68	2		68	68	0	GCA	68	71	3	ATGCTTCTCA	71	81	10
140	caatgcttctcgtgatacccagatcatatgaaacagcatgactttttcaagagtgccatgcccgaaggGGCATGGC	1	caatgcttctcgtgatacccagatcatatgaaacagcatgactttttcaagagt g gccatgccc a CGGTACGGg a g	CAATGCTTCTCGTGATACCCAGATCATATGAAACAGCATGACTTTTTCAAGAGT	0	54	54	GCCATGCC	54	62	8	C	62	63	1	GAAG	63	67	4	G	67	68	1		68	68	0	GGCATGGC	68	76	8		76	76	0
141	caatgcttctcgtgatacccagatcatatgaaacagcatgactttttcaagagtgccatgcccgaaggGAAAAAAAAC	1	caatgcttctcgtgatacccagatcatatgaaacagcatgac aagagtgcc tttttc a AAAAAG t CAAA ggaagcccg	CAATGCTTCTCGTGATACCCAGATCATATGAAACAGCATGAC	0	42	42	TTTTTC	42	48	6		48	48	0	AAGAGTGCCATGCCCGAAGG	48	68	20		68	68	0		68	68	0	GAAAAA	68	74	6	AAAC	74	78	4
142	caatgcttctcgtgatacccagatcatatgaaacagcatgactttttcaagagtgccatgcccgaaggTCATGCTGTTTCATGACCTTCGGGCT	1	caatgcttctcgtgatacccagatcat tttttcaagagt atgaaacagcatgac g TACTTTGTCGTACTggaagcccgtacc TCGGGCTTCCAG	CAATGCTTCTCGTGATACCCAGATCAT	0	27	27	ATGAAACAGCATGA	27	41	14	C	41	42	1	TTTTTCAAGAGTGCCATGCCCGAAG	42	67	25	G	67	68	1		68	68	0	TCATGCTGTTTCAT	68	82	14	GACCTTCGGGCT	82	94	12
143	caatgcttctcgtgatacccagatcatatgaaacagcatgactttttcaagagtgccatgcccgaaggGTATCACGAGAAGCATTGAA	1	agatcatatgaaacagcatgac caatgcttctcgtgataccc t GTTACGAAGAGCACTATGgg t AA aagcccgtaccgtgagaacttt		0	0	0	CAATGCTTCTCGTGATAC	0	18	18	CC	18	20	2	AGATCATATGAAACAGCATGACTTTTTCAAGAGTGCCATGCCCGAA	20	66	46	GG	66	68	2		68	68	0	GTATCACGAGAAGCATTG	68	86	18	AA	86	88	2
144	caatgcttctcgtgatacccagatcatatgaaacagcatgactttttcaagagtgccatgcccgaaggGTATCACGAGATACCCTTCGGGC	1	caatgct agatcatatgaaacagcatgac tctcgtgataccc t AGAGCACTATGgg t CGGGCTTCCCAT aagcccgtaccgtgagaacttt	CAATGCT	0	7	7	TCTCGTGATAC	7	18	11	CC	18	20	2	AGATCATATGAAACAGCATGACTTTTTCAAGAGTGCCATGCCCGAA	20	66	46	GG	66	68	2		68	68	0	GTATCACGAGA	68	79	11	TACCCTTCGGGC	79	91	12
145	caatgcttctcgtgatacccagatcatatgaaacagcatgactttttcaagagtgccatgcccgaaggGCATGGCACTCTTGAAT	1	caatgcttctcgtgatacccagatcatatgaaacagcatgacttt g ttcaagagtgccatgccc a AAGTTCTCACGGTACGgga T	CAATGCTTCTCGTGATACCCAGATCATATGAAACAGCATGACTTT	0	45	45	TTCAAGAGTGCCATGC	45	61	16	CC	61	63	2	GAA	63	66	3	GG	66	68	2		68	68	0	GCATGGCACTCTTGAA	68	84	16	T	84	85	1
146	caatgcttctcgtgatacccagatcatatgaaacagcatgactttttcaagagtgccatgcccgaaggCACTCTTGAAAAAGTCATGCTTTTTCAAGAGTGC	1	caatgcttctcgtgatacccagatcatatgaaac atgc agcatgactttttcaagagtgcc c TCGTACTGAAAAAGTTCTCACggaagc CGTGAGAACTTTT	CAATGCTTCTCGTGATACCCAGATCATATGAAAC	0	34	34	AGCATGACTTTTTCAAGAGTG	34	55	21	CC	55	57	2	ATGCCCGAA	57	66	9	GG	66	68	2		68	68	0	CACTCTTGAAAAAGTCATGCT	68	89	21	TTTTCAAGAGTGC	89	102	13
147	caatgcttctcgtgatacccagatcatatgaaacagcatgactttttcaagagtgccatgcccgaaggCCTCTTGAAAAAGTCAAT	1	caatgcttctcgtgatacccagatcatatgaaacagca tgccatg tgactttttcaagag c ACTGAAAAAGTTCTC c TA Cggaagc	CAATGCTTCTCGTGATACCCAGATCATATGAAACAGCA	0	38	38	TGACTTTTTCAAGAG	38	53	15		53	53	0	TGCCATGCCCGAAGG	53	68	15		68	68	0	C	68	69	1	CTCTTGAAAAAGTCA	69	84	15	AT	84	86	2
148	caatgcttctcgtgatacccagatcatatgaaacagcatgactttttcaagagtgccatgcccgaaggCATGGCACTCTTGAAAAAGTCATGCTGT	1	caatgcttctcgtgatacccagatcatatgaa c acagcatgactttttcaagagtgccatgcc g TGTCGTACTGAAAAAGTTCTCACGGTACgg a a	CAATGCTTCTCGTGATACCCAGATCATATGAA	0	32	32	ACAGCATGACTTTTTCAAGAGTGCCATG	32	60	28	CC	60	62	2	CGAA	62	66	4	GG	66	68	2		68	68	0	CATGGCACTCTTGAAAAAGTCATGCTGT	68	96	28		96	96	0
149	caatgcttctcgtgatacccagatcatatgaaacagcatgactttttcaagagtgccatgcccgaaggTCATGCTGTTTCATCT	1	caatgcttctcgtgatacccagatcat tttttcaagagt atgaaacagcatgac g TACTTTGTCGTACTggaagcccgtacc TC	CAATGCTTCTCGTGATACCCAGATCAT	0	27	27	ATGAAACAGCATGA	27	41	14	C	41	42	1	TTTTTCAAGAGTGCCATGCCCGAAG	42	67	25	G	67	68	1		68	68	0	TCATGCTGTTTCAT	68	82	14	CT	82	84	2
150	caatgcttctcgtgatacccagatcatatgaaacagcatgactttttcaagagtgccatgcccgaaggGGCATGGCACTC	1	caatgcttctcgtgatacccagatcatatgaaacagcatgactttttcaa g gagtgccatgccc a CTCACGGTACGGg a g	CAATGCTTCTCGTGATACCCAGATCATATGAAACAGCATGACTTTTTCAA	0	50	50	GAGTGCCATGCC	50	62	12	C	62	63	1	GAAG	63	67	4	G	67	68	1		68	68	0	GGCATGGCACTC	68	80	12		80	80	0
151	caatgcttctcgtgatacccagatcatatgaaacagcatgactttttcaagagtgccatgcccgaaggAAGCATTGAC	1	tcgtgatacccagatcatatgaaacagc caatgcttc a GTTACGAAg t CA gaagcccgtaccgtgagaactttttcag		0	0	0	CAATGCTT	0	8	8	C	8	9	1	TCGTGATACCCAGATCATATGAAACAGCATGACTTTTTCAAGAGTGCCATGCCCGAAG	9	67	58	G	67	68	1		68	68	0	AAGCATTG	68	76	8	AC	76	78	2
152	caatgcttctcgtgatacccagatcatatgaaacagcatgactttttcaagagtgccatgcccgaaggGTATCACGAGAAGCATTGGT	1	agatcatatgaaacagcatgac caatgcttctcgtgataccc t GTTACGAAGAGCACTATGgg t TG aagcccgtaccgtgagaacttt		0	0	0	CAATGCTTCTCGTGATAC	0	18	18	CC	18	20	2	AGATCATATGAAACAGCATGACTTTTTCAAGAGTGCCATGCCCGAA	20	66	46	GG	66	68	2		68	68	0	GTATCACGAGAAGCATTG	68	86	18	GT	86	88	2
153	caatgcttctcgtgatacccagatcatatgaaacagcatgactttttcaagagtgccatgcccgaaggAATGC	1	caatgcttctcgtgatacccagatcatatgaaacagcatgactttttcaagagtgc gccc cat g GTA a C Agga	CAATGCTTCTCGTGATACCCAGATCATATGAAACAGCATGACTTTTTCAAGAGTGC	0	56	56	CAT	56	59	3		59	59	0	GCCCGAAGG	59	68	9		68	68	0	A	68	69	1	ATG	69	72	3	C	72	73	1
154	caatgcttctcgtgatacccagatcatatgaaacagcatgactttttcaagagtgccatgcccgaaggGTATCACGAGAA	1	caatgc agatcatatgaaacagcatgac ttctcgtgataccc t AAGAGCACTATGgg t aagcccgtaccgtgagaacttt	CAATGC	0	6	6	TTCTCGTGATAC	6	18	12	CC	18	20	2	AGATCATATGAAACAGCATGACTTTTTCAAGAGTGCCATGCCCGAA	20	66	46	GG	66	68	2		68	68	0	GTATCACGAGAA	68	80	12		80	80	0
155	caatgcttctcgtgatacccagatcatatgaaacagcatgactttttcaagagtgccatgcccgaaggCCTCGCCCGAAGA	1	caatgcttctcgtgatacccagatcatatgaaacagcatgactttttcaagagtgccatgcccga agg TCC AGAAGCCCGC	CAATGCTTCTCGTGATACCCAGATCATATGAAACAGCATGACTTTTTCAAGAGTGCCATGCCCGA	0	65	65	AGG	65	68	3		68	68	0		68	68	0		68	68	0		68	68	0	CCT	68	71	3	CGCCCGAAGA	71	81	10
156	caatgcttctcgtgatacccagatcatatgaaacagcatgactttttcaagagtgccatgcccgaaggTCATGCTGTTTCAAATGA	1	caatgcttctcgtgatacccagatcata tttttcaagagt tgaaacagcatgac g ACTTTGTCGTACTggaagcccgtacc AGTAA	CAATGCTTCTCGTGATACCCAGATCATA	0	28	28	TGAAACAGCATGA	28	41	13	C	41	42	1	TTTTTCAAGAGTGCCATGCCCGAAG	42	67	25	G	67	68	1		68	68	0	TCATGCTGTTTCA	68	81	13	AATGA	81	86	5
157	caatgcttctcgtgatacccagatcatatgaaacagcatgactttttcaagagtgccatgcccgaaggCACTCTTGAAAAAGTCATGCTGTGGCTTTTTCAAGAGTGC	1	caatgcttctcgtgatacccagatcatatgaa atgc acagcatgactttttcaagagtgcc c TGTCGTACTGAAAAAGTTCTCACggaagc CGTGAGAACTTTTTCGG	CAATGCTTCTCGTGATACCCAGATCATATGAA	0	32	32	ACAGCATGACTTTTTCAAGAGTG	32	55	23	CC	55	57	2	ATGCCCGAA	57	66	9	GG	66	68	2		68	68	0	CACTCTTGAAAAAGTCATGCTGT	68	91	23	GGCTTTTTCAAGAGTGC	91	108	17
158	caatgcttctcgtgatacccagatcatatgaaacagcatgactttttcaagagtgccatgcccgaaggTCATGCTGTTTC	1	caatgcttctcgtgatacccagatcatat tttttcaagagt gaaacagcatgac g CTTTGTCGTACTggaagcccgtacc	CAATGCTTCTCGTGATACCCAGATCATAT	0	29	29	GAAACAGCATGA	29	41	12	C	41	42	1	TTTTTCAAGAGTGCCATGCCCGAAG	42	67	25	G	67	68	1		68	68	0	TCATGCTGTTTC	68	80	12		80	80	0
159	caatgcttctcgtgatacccagatcatatgaaacagcatgactttttcaagagtgccatgcccgaaggCCATGCTGTTTCATATGAGT	1	caatgcttctcgtgatacccaga actttttcaagagt tcatatgaaacagcatg g AGTATACTTTGTCGTACCggaagcccgtacc TG	CAATGCTTCTCGTGATACCCAGA	0	23	23	TCATATGAAACAGCATG	23	40	17		40	40	0	ACTTTTTCAAGAGTGCCATGCCCGAAGG	40	68	28		68	68	0	C	68	69	1	CATGCTGTTTCATATGA	69	86	17	GT	86	88	2
160	caatgcttctcgtgatacccagatcatatgaaacagcatgactttttcaagagtgccatgcccgaaggGAGAGGAGAG	1	caatgct gtgatacccagatcatatgaaacagcat tctc g AGAGggaagcccgtaccgtgagaactttttca GAGAGG	CAATGCT	0	7	7	TCTC	7	11	4		11	11	0	GTGATACCCAGATCATATGAAACAGCATGACTTTTTCAAGAGTGCCATGCCCGAAGG	11	68	57		68	68	0		68	68	0	GAGA	68	72	4	GGAGAG	72	78	6
161	caatgcttctcgtgatacccagatcatatgaaacagcatgactttttcaagagtgccatgcccgaaggGTATCACGAGAAGCAATT	1	caa agatcatatgaaacagcatgac tgcttctcgtgataccc t ACGAAGAGCACTATGgg t TTA aagcccgtaccgtgagaacttt	CAA	0	3	3	TGCTTCTCGTGATAC	3	18	15	CC	18	20	2	AGATCATATGAAACAGCATGACTTTTTCAAGAGTGCCATGCCCGAA	20	66	46	GG	66	68	2		68	68	0	GTATCACGAGAAGCA	68	83	15	ATT	83	86	3
162	caatgcttctcgtgatacccagatcatatgaaacagcatgactttttcaagagtgccatgcccgaaggCACTCTTGAAAAGTGCCTTCGGGCA	1	caatgcttctcgtgatacccagatcatatgaaacagcatgact atgc ttttcaagagtgcc c AAAAGTTCTCACggaagc ACGGGCTTCCGTG	CAATGCTTCTCGTGATACCCAGATCATATGAAACAGCATGACT	0	43	43	TTTTCAAGAGTG	43	55	12	CC	55	57	2	ATGCCCGAA	57	66	9	GG	66	68	2		68	68	0	CACTCTTGAAAA	68	80	12	GTGCCTTCGGGCA	80	93	13
163	caatgcttctcgtgatacccagatcatatgaaacagcatgactttttcaagagtgccatgcccgaaggGCATGGCACTCCGGGCATGGCAC	1	caatgcttctcgtgatacccagatcatatgaaacagcatgactttttcaa g gagtgccatgccc a CTCACGGTACGgga CACGGTACGGGC	CAATGCTTCTCGTGATACCCAGATCATATGAAACAGCATGACTTTTTCAA	0	50	50	GAGTGCCATGC	50	61	11	CC	61	63	2	GAA	63	66	3	GG	66	68	2		68	68	0	GCATGGCACTC	68	79	11	CGGGCATGGCAC	79	91	12
164	caatgcttctcgtgatacccagatcatatgaaacagcatgactttttcaagagtgccatgcccgaaggTCATGCTGTTCTTCGGGCATGGCAC	1	caatgcttctcgtgatacccagatcatatga tttttcaagagt aacagcatgac g TTGTCGTACTggaagcccgtacc CACGGTACGGGCTTC	CAATGCTTCTCGTGATACCCAGATCATATGA	0	31	31	AACAGCATGA	31	41	10	C	41	42	1	TTTTTCAAGAGTGCCATGCCCGAAG	42	67	25	G	67	68	1		68	68	0	TCATGCTGTT	68	78	10	CTTCGGGCATGGCAC	78	93	15
165	caatgcttctcgtgatacccagatcatatgaaacagcatgactttttcaagagtgccatgcccgaaggGTATCACGAGAAGCCAT	1	caat agatcatatgaaacagcatgac gcttctcgtgataccc t CGAAGAGCACTATGgg t TAC aagcccgtaccgtgagaacttt	CAAT	0	4	4	GCTTCTCGTGATAC	4	18	14	CC	18	20	2	AGATCATATGAAACAGCATGACTTTTTCAAGAGTGCCATGCCCGAA	20	66	46	GG	66	68	2		68	68	0	GTATCACGAGAAGC	68	82	14	CAT	82	85	3
166	caatgcttctcgtgatacccagatcatatgaaacagcatgactttttcaagagtgccatgcccgaaggGCATGGCACTCTTGAAAAAGTCC	1	caatgcttctcgtgatacccagatcatatgaaacagcat g gactttttcaagagtgccatgccc a CTGAAAAAGTTCTCACGGTACGgga C	CAATGCTTCTCGTGATACCCAGATCATATGAAACAGCAT	0	39	39	GACTTTTTCAAGAGTGCCATGC	39	61	22	CC	61	63	2	GAA	63	66	3	GG	66	68	2		68	68	0	GCATGGCACTCTTGAAAAAGTC	68	90	22	C	90	91	1
167	caatgcttctcgtgatacccagatcatatgaaacagcatgactttttcaagagtgccatgcccgaaggGTATTACTCTTGAAAAAGTCATACC	1	caatgcttctcgtgatacccagatcatatgaaacagc gccatgccc atgactttttcaagagt g TACTGAAAAAGTTCTCATTATGggaa CCA	CAATGCTTCTCGTGATACCCAGATCATATGAAACAGC	0	37	37	ATGACTTTTTCAAGAGT	37	54	17		54	54	0	GCCATGCCCGAAGG	54	68	14		68	68	0	GTATT	68	73	5	ACTCTTGAAAAAGTCAT	73	90	17	ACC	90	93	3
168	caatgcttctcgtgatacccagatcatatgaaacagcatgactttttcaagagtgccatgcccgaaggGCATGGCACTCTTGAAAAAGT	1	caatgcttctcgtgatacccagatcatatgaaacagcatg g actttttcaagagtgccatgccc a TGAAAAAGTTCTCACGGTACGgga	CAATGCTTCTCGTGATACCCAGATCATATGAAACAGCATG	0	40	40	ACTTTTTCAAGAGTGCCATGC	40	61	21	CC	61	63	2	GAA	63	66	3	GG	66	68	2		68	68	0	GCATGGCACTCTTGAAAAAGT	68	89	21		89	89	0
169	caatgcttctcgtgatacccagatcatatgaaacagcatgactttttcaagagtgccatgcccgaaggCCATGCTGTTTCATATGAAGAAGCATACG	1	caatgcttctcgtgatacccaga actttttcaagagt tcatatgaaacagcatg g AGTATACTTTGTCGTACCggaagcccgtacc GCATACGAAGA	CAATGCTTCTCGTGATACCCAGA	0	23	23	TCATATGAAACAGCATG	23	40	17		40	40	0	ACTTTTTCAAGAGTGCCATGCCCGAAGG	40	68	28		68	68	0	C	68	69	1	CATGCTGTTTCATATGA	69	86	17	AGAAGCATACG	86	97	11
170	caatgcttctcgtgatacccagatcatatgaaacagcatgactttttcaagagtgccatgcccgaaggGGCATGGCGC	1	caatgcttctcgtgatacccagatcatatgaaacagcatgactttttcaagagt g gccatgccc a CGGTACGGg a CG g	CAATGCTTCTCGTGATACCCAGATCATATGAAACAGCATGACTTTTTCAAGAGT	0	54	54	GCCATGCC	54	62	8	C	62	63	1	GAAG	63	67	4	G	67	68	1		68	68	0	GGCATGGC	68	76	8	GC	76	78	2
171	caatgcttctcgtgatacccagatcatatgaaacagcatgactttttcaagagtgccatgcccgaaggCCATGCTGTTTCATATGAA	1	caatgcttctcgtgatacccaga actttttcaagagt tcatatgaaacagcatg g AGTATACTTTGTCGTACCggaagcccgtacc A	CAATGCTTCTCGTGATACCCAGA	0	23	23	TCATATGAAACAGCATG	23	40	17		40	40	0	ACTTTTTCAAGAGTGCCATGCCCGAAGG	40	68	28		68	68	0	C	68	69	1	CATGCTGTTTCATATGA	69	86	17	A	86	87	1
172	caatgcttctcgtgatacccagatcatatgaaacagcatgactttttcaagagtgccatgcccgaaggCCATGCTGTTTCATATGATCCAGCATGGCCTTC	1	caatgcttctcgtgataccca actttttcaagagt gatcatatgaaacagcatg g CTAGTATACTTTGTCGTACCggaagcccgtacc CTTCCGGTACGAC	CAATGCTTCTCGTGATACCCA	0	21	21	GATCATATGAAACAGCATG	21	40	19		40	40	0	ACTTTTTCAAGAGTGCCATGCCCGAAGG	40	68	28		68	68	0	C	68	69	1	CATGCTGTTTCATATGATC	69	88	19	CAGCATGGCCTTC	88	101	13
173	caatgcttctcgtgatacccagatcatatgaaacagcatgactttttcaagagtgccatgcccgaaggGTATCACGAGAAGCATCGAC	1	ca agatcatatgaaacagcatgac atgcttctcgtgataccc t TACGAAGAGCACTATGgg t CAGC aagcccgtaccgtgagaacttt	CA	0	2	2	ATGCTTCTCGTGATAC	2	18	16	CC	18	20	2	AGATCATATGAAACAGCATGACTTTTTCAAGAGTGCCATGCCCGAA	20	66	46	GG	66	68	2		68	68	0	GTATCACGAGAAGCAT	68	84	16	CGAC	84	88	4
174	caatgcttctcgtgatacccagatcatatgaaacagcatgactttttcaagagtgccatgcccgaaggGGCATGGCACTCG	1	caatgcttctcgtgatacccagatcatatgaaacagcatgactttttcaa g gagtgccatgccc a CTCACGGTACGGg a G g	CAATGCTTCTCGTGATACCCAGATCATATGAAACAGCATGACTTTTTCAA	0	50	50	GAGTGCCATGCC	50	62	12	C	62	63	1	GAAG	63	67	4	G	67	68	1		68	68	0	GGCATGGCACTC	68	80	12	G	80	81	1
175	caatgcttctcgtgatacccagatcatatgaaacagcatgactttttcaagagtgccatgcccgaaggGTATCACGAGAAGCATTGATC	1	agatcatatgaaacagcatgac caatgcttctcgtgataccc t GTTACGAAGAGCACTATGgg t CTA aagcccgtaccgtgagaacttt		0	0	0	CAATGCTTCTCGTGATAC	0	18	18	CC	18	20	2	AGATCATATGAAACAGCATGACTTTTTCAAGAGTGCCATGCCCGAA	20	66	46	GG	66	68	2		68	68	0	GTATCACGAGAAGCATTG	68	86	18	ATC	86	89	3
176	caatgcttctcgtgatacccagatcatatgaaacagcatgactttttcaagagtgccatgcccgaaggCATGGCACTCTTGAAAAAGTC	1	caatgcttctcgtgatacccagatcatatgaaacagcat c gactttttcaagagtgccatgcc g CTGAAAAAGTTCTCACGGTACgg a a	CAATGCTTCTCGTGATACCCAGATCATATGAAACAGCAT	0	39	39	GACTTTTTCAAGAGTGCCATG	39	60	21	CC	60	62	2	CGAA	62	66	4	GG	66	68	2		68	68	0	CATGGCACTCTTGAAAAAGTC	68	89	21		89	89	0
177	caatgcttctcgtgatacccagatcatatgaaacagcatgactttttcaagagtgccatgcccgaaggTCATGCTGTTTCATGACCTTCGGGCGAGG	1	caatgcttctcgtgatacccagatcat tttttcaagagt atgaaacagcatgac g TACTTTGTCGTACTggaagcccgtacc GGAGCGGGCTTCCAG	CAATGCTTCTCGTGATACCCAGATCAT	0	27	27	ATGAAACAGCATGA	27	41	14	C	41	42	1	TTTTTCAAGAGTGCCATGCCCGAAG	42	67	25	G	67	68	1		68	68	0	TCATGCTGTTTCAT	68	82	14	GACCTTCGGGCGAGG	82	97	15
178	caatgcttctcgtgatacccagatcatatgaaacagcatgactttttcaagagtgccatgcccgaaggCCATGCTGTTTCATATGAAT	1	caatgcttctcgtgatacccaga actttttcaagagt tcatatgaaacagcatg g AGTATACTTTGTCGTACCggaagcccgtacc TA	CAATGCTTCTCGTGATACCCAGA	0	23	23	TCATATGAAACAGCATG	23	40	17		40	40	0	ACTTTTTCAAGAGTGCCATGCCCGAAGG	40	68	28		68	68	0	C	68	69	1	CATGCTGTTTCATATGA	69	86	17	AT	86	88	2
179	caatgcttctcgtgatacccagatcatatgaaacagcatgactttttcaagagtgccatgcccgaaggGTATCACGAGAAGCATTGAAC	1	agatcatatgaaacagcatgac caatgcttctcgtgataccc t GTTACGAAGAGCACTATGgg t CAA aagcccgtaccgtgagaacttt		0	0	0	CAATGCTTCTCGTGATAC	0	18	18	CC	18	20	2	AGATCATATGAAACAGCATGACTTTTTCAAGAGTGCCATGCCCGAA	20	66	46	GG	66	68	2		68	68	0	GTATCACGAGAAGCATTG	68	86	18	AAC	86	89	3
180	caatgcttctcgtgatacccagatcatatgaaacagcatgactttttcaagagtgccatgcccgaaggCACTCTTGAGAAAGTCATGCTGT	1	caatgcttctcgtgatacccagatcatatgaaacagcatgactttt atgc tcaagagtgcc c AGTTCTCACggaagc TGTCGTACTGAAAG	CAATGCTTCTCGTGATACCCAGATCATATGAAACAGCATGACTTTT	0	46	46	TCAAGAGTG	46	55	9	CC	55	57	2	ATGCCCGAA	57	66	9	GG	66	68	2		68	68	0	CACTCTTGA	68	77	9	GAAAGTCATGCTGT	77	91	14
181	caatgcttctcgtgatacccagatcatatgaaacagcatgactttttcaagagtgccatgcccgaaggCAATGCTTCTCGTGATACCCAGATCATATGAAACAGCATGACTTTTTCAAGAGTGCC	1	caatgcttctcgtgatacccagatcatatgaaacagcatgactttttcaagagtgcca c tgcc g ACgg a CCGTGAGAACTTTTTCAGTACGACAAAGTATACTAGACCCATAGTGCTCTTCGTA a	CAATGCTTCTCGTGATACCCAGATCATATGAAACAGCATGACTTTTTCAAGAGTGCCA	0	58	58	TG	58	60	2	CC	60	62	2	CGAA	62	66	4	GG	66	68	2		68	68	0	CA	68	70	2	ATGCTTCTCGTGATACCCAGATCATATGAAACAGCATGACTTTTTCAAGAGTGCC	70	125	55
182	caatgcttctcgtgatacccagatcatatgaaacagcatgactttttcaagagtgccatgcccgaaggGCTGTTTCGGGCATGGCACTTCGGGCATGGAGTGCCATGCCCGA	1	caatgcttctcgtgatacccagatcatat atgactttttcaaga gaaacagc g CTTTGTCGggaagcccgtaccgt AGCCCGTACCGTGAGGTACGGGCTTCACGGTACGGG	CAATGCTTCTCGTGATACCCAGATCATAT	0	29	29	GAAACAGC	29	37	8		37	37	0	ATGACTTTTTCAAGAGTGCCATGCCCGAAGG	37	68	31		68	68	0		68	68	0	GCTGTTTC	68	76	8	GGGCATGGCACTTCGGGCATGGAGTGCCATGCCCGA	76	112	36
183	caatgcttctcgtgatacccagatcatatgaaacagcatgactttttcaagagtgccatgcccgaaggGCATGGCACTCTTGAAAAC	1	caatgcttctcgtgatacccagatcatatgaaacagcatgact g ttttcaagagtgccatgccc a AAAAGTTCTCACGGTACGgga C	CAATGCTTCTCGTGATACCCAGATCATATGAAACAGCATGACT	0	43	43	TTTTCAAGAGTGCCATGC	43	61	18	CC	61	63	2	GAA	63	66	3	GG	66	68	2		68	68	0	GCATGGCACTCTTGAAAA	68	86	18	C	86	87	1
184	caatgcttctcgtgatacccagatcatatgaaacagcatgactttttcaagagtgccatgcccgaaggGGCATGGCA	1	caatgcttctcgtgatacccagatcatatgaaacagcatgactttttcaagag g tgccatgccc a ACGGTACGGg a g	CAATGCTTCTCGTGATACCCAGATCATATGAAACAGCATGACTTTTTCAAGAG	0	53	53	TGCCATGCC	53	62	9	C	62	63	1	GAAG	63	67	4	G	67	68	1		68	68	0	GGCATGGCA	68	77	9		77	77	0
185	caatgcttctcgtgatacccagatcatatgaaacagcatgactttttcaagagtgccatgcccgaaggGCATGGCACTCTTGAATA	1	caatgcttctcgtgatacccagatcatatgaaacagcatgacttt g ttcaagagtgccatgccc a AAGTTCTCACGGTACGgga AT	CAATGCTTCTCGTGATACCCAGATCATATGAAACAGCATGACTTT	0	45	45	TTCAAGAGTGCCATGC	45	61	16	CC	61	63	2	GAA	63	66	3	GG	66	68	2		68	68	0	GCATGGCACTCTTGAA	68	84	16	TA	84	86	2
186	caatgcttctcgtgatacccagatcatatgaaacagcatgactttttcaagagtgccatgcccgaaggCACTCTTGAAAAAA	1	caatgcttctcgtgatacccagatcatatgaaacagcatgac atgc tttttcaagagtgcc c AAAAAGTTCTCACggaagc A	CAATGCTTCTCGTGATACCCAGATCATATGAAACAGCATGAC	0	42	42	TTTTTCAAGAGTG	42	55	13	CC	55	57	2	ATGCCCGAA	57	66	9	GG	66	68	2		68	68	0	CACTCTTGAAAAA	68	81	13	A	81	82	1
187	caatgcttctcgtgatacccagatcatatgaaacagcatgactttttcaagagtgccatgcccgaaggGCTGTT	1	caatgcttctcgtgatacccagatcatatga atgactttttcaaga aacagc g TTGTCGggaagcccgtaccgt	CAATGCTTCTCGTGATACCCAGATCATATGA	0	31	31	AACAGC	31	37	6		37	37	0	ATGACTTTTTCAAGAGTGCCATGCCCGAAGG	37	68	31		68	68	0		68	68	0	GCTGTT	68	74	6		74	74	0
188	caatgcttctcgtgatacccagatcatatgaaacagcatgactttttcaagagtgccatgcccgaaggCCCTCTTGAAAGCAATGCTTC	1	caatgcttctcgtgatacccagatcatatgaaacagcatgactt tgccatgc tttcaagag c AAAGTTCTCCCggaagc CTTCGTAACG	CAATGCTTCTCGTGATACCCAGATCATATGAAACAGCATGACTT	0	44	44	TTTCAAGAG	44	53	9		53	53	0	TGCCATGCCCGAAGG	53	68	15		68	68	0	CC	68	70	2	CTCTTGAAA	70	79	9	GCAATGCTTC	79	89	10
189	caatgcttctcgtgatacccagatcatatgaaacagcatgactttttcaagagtgccatgcccgaaggCATGGCACTCTTGAAAAGTCATGCTGTT	1	caatgcttctcgtgatacccagatcatatgaaacagcatgact c ttttcaagagtgccatgcc g AAAAGTTCTCACGGTACgg a TTGTCGTACTG a	CAATGCTTCTCGTGATACCCAGATCATATGAAACAGCATGACT	0	43	43	TTTTCAAGAGTGCCATG	43	60	17	CC	60	62	2	CGAA	62	66	4	GG	66	68	2		68	68	0	CATGGCACTCTTGAAAA	68	85	17	GTCATGCTGTT	85	96	11
190	caatgcttctcgtgatacccagatcatatgaaacagcatgactttttcaagagtgccatgcccgaaggTC	1	caatgcttctcgtgatacccagatcatatgaaacagcat tttttcaagagt gac g CTggaagcccgtacc	CAATGCTTCTCGTGATACCCAGATCATATGAAACAGCAT	0	39	39	GA	39	41	2	C	41	42	1	TTTTTCAAGAGTGCCATGCCCGAAG	42	67	25	G	67	68	1		68	68	0	TC	68	70	2		70	70	0
191	caatgcttctcgtgatacccagatcatatgaaacagcatgactttttcaagagtgccatgcccgaaggTCATGCTGTTTCATATAC	1	caatgcttctcgtgatacccagatc tttttcaagagt atatgaaacagcatgac g TATACTTTGTCGTACTggaagcccgtacc CA	CAATGCTTCTCGTGATACCCAGATC	0	25	25	ATATGAAACAGCATGA	25	41	16	C	41	42	1	TTTTTCAAGAGTGCCATGCCCGAAG	42	67	25	G	67	68	1		68	68	0	TCATGCTGTTTCATAT	68	84	16	AC	84	86	2
192	caatgcttctcgtgatacccagatcatatgaaacagcatgactttttcaagagtgccatgcccgaaggGTCATGCTGTTTCATATGATCTGGGTAAC	1	caatgcttctcgtga tttttcaagagt tacccagatcatatgaaacagcatgac g ATGGGTCTAGTATACTTTGTCGTACTG c CA ggaagcccgtac	CAATGCTTCTCGTGA	0	15	15	TACCCAGATCATATGAAACAGCATGAC	15	42	27		42	42	0	TTTTTCAAGAGTGCCATGCCCGAAGG	42	68	26		68	68	0		68	68	0	GTCATGCTGTTTCATATGATCTGGGTA	68	95	27	AC	95	97	2
193	caatgcttctcgtgatacccagatcatatgaaacagcatgactttttcaagagtgccatgcccgaaggAGTCATGCTGT	1	caatgcttctcgtgatacccagatcatatgaa ttttcaagagtg acagcatgact c TGTCGTACTGAggaagcccgtac	CAATGCTTCTCGTGATACCCAGATCATATGAA	0	32	32	ACAGCATGACT	32	43	11		43	43	0	TTTTCAAGAGTGCCATGCCCGAAGG	43	68	25		68	68	0		68	68	0	AGTCATGCTGT	68	79	11		79	79	0
194	caatgcttctcgtgatacccagatcatatgaaacagcatgactttttcaagagtgccatgcccgaaggCCATGCTGTTTCATATGATCTGGGTATACGAGAAGCAT	1	caatgcttctcgtg actttttcaagagt atacccagatcatatgaaacagcatg g TATGGGTCTAGTATACTTTGTCGTACCggaagcccgtacc TACGAAGAGCA	CAATGCTTCTCGTG	0	14	14	ATACCCAGATCATATGAAACAGCATG	14	40	26		40	40	0	ACTTTTTCAAGAGTGCCATGCCCGAAGG	40	68	28		68	68	0	C	68	69	1	CATGCTGTTTCATATGATCTGGGTAT	69	95	26	ACGAGAAGCAT	95	106	11
195	caatgcttctcgtgatacccagatcatatgaaacagcatgactttttcaagagtgccatgcccgaaggCACTCTTGAAAAAGAGTGCCTTC	1	caatgcttctcgtgatacccagatcatatgaaacagcatga atgc ctttttcaagagtgcc c GAAAAAGTTCTCACggaagc CTTCCGTGA	CAATGCTTCTCGTGATACCCAGATCATATGAAACAGCATGA	0	41	41	CTTTTTCAAGAGTG	41	55	14	CC	55	57	2	ATGCCCGAA	57	66	9	GG	66	68	2		68	68	0	CACTCTTGAAAAAG	68	82	14	AGTGCCTTC	82	91	9
196	caatgcttctcgtgatacccagatcatatgaaacagcatgactttttcaagagtgccatgcccgaaggCCTCTTGAAAAAGTC	1	caatgcttctcgtgatacccagatcatatgaaacagcat tgccatg gactttttcaagag c CTGAAAAAGTTCTC c Cggaagc	CAATGCTTCTCGTGATACCCAGATCATATGAAACAGCAT	0	39	39	GACTTTTTCAAGAG	39	53	14		53	53	0	TGCCATGCCCGAAGG	53	68	15		68	68	0	C	68	69	1	CTCTTGAAAAAGTC	69	83	14		83	83	0
197	caatgcttctcgtgatacccagatcatatgaaacagcatgactttttcaagagtgccatgcccgaaggCACTCTTGAAAAAGTGTGCCTTCGGGCAT	1	caatgcttctcgtgatacccagatcatatgaaacagcatg atgc actttttcaagagtgcc c TGAAAAAGTTCTCACggaagc TACGGGCTTCCGTG	CAATGCTTCTCGTGATACCCAGATCATATGAAACAGCATG	0	40	40	ACTTTTTCAAGAGTG	40	55	15	CC	55	57	2	ATGCCCGAA	57	66	9	GG	66	68	2		68	68	0	CACTCTTGAAAAAGT	68	83	15	GTGCCTTCGGGCAT	83	97	14
198	caatgcttctcgtgatacccagatcatatgaaacagcatgactttttcaagagtgccatgcccgaaggTCATGCTGTTTCATATGATCTGAAACAGCATGACCTTCGGGCG	1	caatgcttctcgtgatacc tttttcaagagt cagatcatatgaaacagcatgac g GTCTAGTATACTTTGTCGTACTggaagcccgtacc GCGGGCTTCCAGTACGACAAA	CAATGCTTCTCGTGATACC	0	19	19	CAGATCATATGAAACAGCATGA	19	41	22	C	41	42	1	TTTTTCAAGAGTGCCATGCCCGAAG	42	67	25	G	67	68	1		68	68	0	TCATGCTGTTTCATATGATCTG	68	90	22	AAACAGCATGACCTTCGGGCG	90	111	21
199	caatgcttctcgtgatacccagatcatatgaaacagcatgactttttcaagagtgccatgcccgaaggGGCATGGCACACT	1	caatgcttctcgtgatacccagatcatatgaaacagcatgactttttcaaga g gtgccatgccc a CACGGTACGGg a TCA g	CAATGCTTCTCGTGATACCCAGATCATATGAAACAGCATGACTTTTTCAAGA	0	52	52	GTGCCATGCC	52	62	10	C	62	63	1	GAAG	63	67	4	G	67	68	1		68	68	0	GGCATGGCAC	68	78	10	ACT	78	81	3
200	caatgcttctcgtgatacccagatcatatgaaacagcatgactttttcaagagtgccatgcccgaaggGCACA	1	caatgcttctcgtgatacccagatcatatgaaacagcatgactttttcaaga atgc gtgcc c CACGg c A gaag	CAATGCTTCTCGTGATACCCAGATCATATGAAACAGCATGACTTTTTCAAGA	0	52	52	GTGC	52	56	4	C	56	57	1	ATGCCCGAAG	57	67	10	G	67	68	1		68	68	0	GCAC	68	72	4	A	72	73	1
201	caatgcttctcgtgatacccagatcatatgaaacagcatgactttttcaagagtgccatgcccgaaggTGGAGTTCTCGGGTGACAGGGGGTTCCGGTAACACTTGA	1	caatgcttctcgtgatacccagatcatatgaaacagcatgactttttcaagagtg tgcc cca c GGT g AGTTCACAATGGCCTTGGGGGACAGTGGGCTCTTGA ggaa	CAATGCTTCTCGTGATACCCAGATCATATGAAACAGCATGACTTTTTCAAGAGTG	0	55	55	CCA	55	58	3		58	58	0	TGCCCGAAGG	58	68	10		68	68	0		68	68	0	TGG	68	71	3	AGTTCTCGGGTGACAGGGGGTTCCGGTAACACTTGA	71	107	36
202	caatgcttctcgtgatacccagatcatatgaaacagcatgactttttcaagagtgccatgcccgaaggGCATGGCACTCTTGAAAAGTCATTGCTGTTTCT	1	caatgcttctcgtgatacccagatcatatgaaacagcatgact g ttttcaagagtgccatgccc a AAAAGTTCTCACGGTACGgga TCTTTGTCGTTACTG	CAATGCTTCTCGTGATACCCAGATCATATGAAACAGCATGACT	0	43	43	TTTTCAAGAGTGCCATGC	43	61	18	CC	61	63	2	GAA	63	66	3	GG	66	68	2		68	68	0	GCATGGCACTCTTGAAAA	68	86	18	GTCATTGCTGTTTCT	86	101	15
203	caatgcttctcgtgatacccagatcatatgaaacagcatgactttttcaagagtgccatgcccgaaggGCATGGCACTCTTGAAAA	1	caatgcttctcgtgatacccagatcatatgaaacagcatgact g ttttcaagagtgccatgccc a AAAAGTTCTCACGGTACGgga	CAATGCTTCTCGTGATACCCAGATCATATGAAACAGCATGACT	0	43	43	TTTTCAAGAGTGCCATGC	43	61	18	CC	61	63	2	GAA	63	66	3	GG	66	68	2		68	68	0	GCATGGCACTCTTGAAAA	68	86	18		86	86	0
204	caatgcttctcgtgatacccagatcatatgaaacagcatgactttttcaagagtgccatgcccgaaggCCATGCTGTTTCATATGAAACAGCATGGCCTTCGGA	1	caatgcttctcgtgatacccaga actttttcaagagt tcatatgaaacagcatg g AGTATACTTTGTCGTACCggaagcccgtacc AGGCTTCCGGTACGACAA	CAATGCTTCTCGTGATACCCAGA	0	23	23	TCATATGAAACAGCATG	23	40	17		40	40	0	ACTTTTTCAAGAGTGCCATGCCCGAAGG	40	68	28		68	68	0	C	68	69	1	CATGCTGTTTCATATGA	69	86	17	AACAGCATGGCCTTCGGA	86	104	18
205	caatgcttctcgtgatacccagatcatatgaaacagcatgactttttcaagagtgccatgcccgaaggGCATGGCACTCTTCAAGAGTGCCATGCCCGAAGG	1	caatgcttctcgtgatacccagatcatatgaaacagcatgactttttc g aagagtgccatgccc a TTCTCACGGTACGgga GGAAGCCCGTACCGTGAGAAC	CAATGCTTCTCGTGATACCCAGATCATATGAAACAGCATGACTTTTTC	0	48	48	AAGAGTGCCATGC	48	61	13	CC	61	63	2	GAA	63	66	3	GG	66	68	2		68	68	0	GCATGGCACTCTT	68	81	13	CAAGAGTGCCATGCCCGAAGG	81	102	21
206	caatgcttctcgtgatacccagatcatatgaaacagcatgactttttcaagagtgccatgcccgaaggTCATGCTGTTTCATAAG	1	caatgcttctcgtgatacccagatca tttttcaagagt tatgaaacagcatgac g ATACTTTGTCGTACTggaagcccgtacc GA	CAATGCTTCTCGTGATACCCAGATCA	0	26	26	TATGAAACAGCATGA	26	41	15	C	41	42	1	TTTTTCAAGAGTGCCATGCCCGAAG	42	67	25	G	67	68	1		68	68	0	TCATGCTGTTTCATA	68	83	15	AG	83	85	2
207	caatgcttctcgtgatacccagatcatatgaaacagcatgactttttcaagagtgccatgcccgaaggTCATGCTGTTTCATATGAAACAGCATGACCTTC	1	caatgcttctcgtgatacccaga tttttcaagagt tcatatgaaacagcatgac g AGTATACTTTGTCGTACTggaagcccgtacc CTTCCAGTACGACAA	CAATGCTTCTCGTGATACCCAGA	0	23	23	TCATATGAAACAGCATGA	23	41	18	C	41	42	1	TTTTTCAAGAGTGCCATGCCCGAAG	42	67	25	G	67	68	1		68	68	0	TCATGCTGTTTCATATGA	68	86	18	AACAGCATGACCTTC	86	101	15
208	caatgcttctcgtgatacccagatcatatgaaacagcatgactttttcaagagtgccatgcccgaaggTCATGCTGTTTCATGTGAAA	1	caatgcttctcgtgatacccagatcat tttttcaagagt atgaaacagcatgac g TACTTTGTCGTACTggaagcccgtacc AAAGTG	CAATGCTTCTCGTGATACCCAGATCAT	0	27	27	ATGAAACAGCATGA	27	41	14	C	41	42	1	TTTTTCAAGAGTGCCATGCCCGAAG	42	67	25	G	67	68	1		68	68	0	TCATGCTGTTTCAT	68	82	14	GTGAAA	82	88	6
209	caatgcttctcgtgatacccagatcatatgaaacagcatgactttttcaagagtgccatgcccgaaggCCTCTTGAAAAAGTCATGCTGTTTCATAT	1	caatgcttctcgtgatacccagatc tgccatg atatgaaacagcatgactttttcaagag c TATACTTTGTCGTACTGAAAAAGTTCTC c Cggaagc	CAATGCTTCTCGTGATACCCAGATC	0	25	25	ATATGAAACAGCATGACTTTTTCAAGAG	25	53	28		53	53	0	TGCCATGCCCGAAGG	53	68	15		68	68	0	C	68	69	1	CTCTTGAAAAAGTCATGCTGTTTCATAT	69	97	28		97	97	0
210	caatgcttctcgtgatacccagatcatatgaaacagcatgactttttcaagagtgccatgcccgaaggCATGGAAC	1	caatgcttctcgtgatacccagatcatatgaaacagcatgactttttcaagagtg c ccatgcc g GGTACgg a CAA a	CAATGCTTCTCGTGATACCCAGATCATATGAAACAGCATGACTTTTTCAAGAGTG	0	55	55	CCATG	55	60	5	CC	60	62	2	CGAA	62	66	4	GG	66	68	2		68	68	0	CATGG	68	73	5	AAC	73	76	3
211	caatgcttctcgtgatacccagatcatatgaaacagcatgactttttcaagagtgccatgcccgaaggGCATGGCACTCATTCT	1	caatgcttctcgtgatacccagatcatatgaaacagcatgactttttcaa g gagtgccatgccc a CTCACGGTACGgga TCTTA	CAATGCTTCTCGTGATACCCAGATCATATGAAACAGCATGACTTTTTCAA	0	50	50	GAGTGCCATGC	50	61	11	CC	61	63	2	GAA	63	66	3	GG	66	68	2		68	68	0	GCATGGCACTC	68	79	11	ATTCT	79	84	5
212	caatgcttctcgtgatacccagatcatatgaaacagcatgactttttcaagagtgccatgcccgaaggGTAAAGGGCATGGCACTCTTGAAAAAGTCAT	1	caatgcttctcgtgatacccagatcatatgaaacagc gaag atgactttttcaagagtgccatgccc g TACTGAAAAAGTTCTCACGGTACGGG G AAAT	CAATGCTTCTCGTGATACCCAGATCATATGAAACAGC	0	37	37	ATGACTTTTTCAAGAGTGCCATGCCC	37	63	26		63	63	0	GAAGG	63	68	5		68	68	0	GTAAA	68	73	5	GGGCATGGCACTCTTGAAAAAGTCAT	73	99	26		99	99	0
213	caatgcttctcgtgatacccagatcatatgaaacagcatgactttttcaagagtgccatgcccgaaggGCATGGCACTCTTAAAAAGTCATGCTGTTTCAT	1	caatgcttctcgtgatacccagatcatatgaaacagcatgactttttc g aagagtgccatgccc a TTCTCACGGTACGgga TACTTTGTCGTACTGAAAAA	CAATGCTTCTCGTGATACCCAGATCATATGAAACAGCATGACTTTTTC	0	48	48	AAGAGTGCCATGC	48	61	13	CC	61	63	2	GAA	63	66	3	GG	66	68	2		68	68	0	GCATGGCACTCTT	68	81	13	AAAAAGTCATGCTGTTTCAT	81	101	20
214	caatgcttctcgtgatacccagatcatatgaaacagcatgactttttcaagagtgccatgcccgaaggGCCATGGCACTCGAAAAAGTCATGCTGTTTCGT	1	caatgcttctcgtgatacccagatcatatgaaacagcatgactttttcaa c gagtgccatg--cc g CTCACGGTACCGgg a TGCTTTGTCGTACTGAAAAAG a	CAATGCTTCTCGTGATACCCAGATCATATGAAACAGCATGACTTTTTCAA	0	50	50	GAGTGCCATG	50	60	10	CC	60	62	2	CGAA	62	66	4	GG	66	68	2	GC	68	70	2	CATGGCACTC	70	80	10	GAAAAAGTCATGCTGTTTCGT	80	101	21
215	caatgcttctcgtgatacccagatcatatgaaacagcatgactttttcaagagtgccatgcccgaaggCACTCTTGAAGAAGTCATGCTGTTTCAA	1	caatgcttctcgtgatacccagatcatatgaaacagcatgacttt atgc ttcaagagtgcc c AAGTTCTCACggaagc AACTTTGTCGTACTGAAG	CAATGCTTCTCGTGATACCCAGATCATATGAAACAGCATGACTTT	0	45	45	TTCAAGAGTG	45	55	10	CC	55	57	2	ATGCCCGAA	57	66	9	GG	66	68	2		68	68	0	CACTCTTGAA	68	78	10	GAAGTCATGCTGTTTCAA	78	96	18
216	caatgcttctcgtgatacccagatcatatgaaacagcatgactttttcaagagtgccatgcccgaaggGTCTCACGAGAAGCATT	1	c tacccagatcatatgaaacagcatgac aatgcttctcgtga t TTACGAAGAGCACT t CTGggaagcccgtaccgtgagaacttt	C	0	1	1	AATGCTTCTCGTGA	1	15	14		15	15	0	TACCCAGATCATATGAAACAGCATGACTTTTTCAAGAGTGCCATGCCCGAAGG	15	68	53		68	68	0	GTC	68	71	3	TCACGAGAAGCATT	71	85	14		85	85	0
217	caatgcttctcgtgatacccagatcatatgaaacagcatgactttttcaagagtgccatgcccgaaggACA	1	caatgcttctcgtgatacccagatcatatgaaacagcatgactttttcaagagtgcca c tg-cc g ACAgg a a	CAATGCTTCTCGTGATACCCAGATCATATGAAACAGCATGACTTTTTCAAGAGTGCCA	0	58	58	TG	58	60	2	CC	60	62	2	CGAA	62	66	4	GG	66	68	2	A	68	69	1	CA	69	71	2		71	71	0
218	caatgcttctcgtgatacccagatcatatgaaacagcatgactttttcaagagtgccatgcccgaaggGCATGGCACTCTTGAAAGTCATGA	1	caatgcttctcgtgatacccagatcatatgaaacagcatgactt g tttcaagagtgccatgccc a AAAGTTCTCACGGTACGgga AGTACTG	CAATGCTTCTCGTGATACCCAGATCATATGAAACAGCATGACTT	0	44	44	TTTCAAGAGTGCCATGC	44	61	17	CC	61	63	2	GAA	63	66	3	GG	66	68	2		68	68	0	GCATGGCACTCTTGAAA	68	85	17	GTCATGA	85	92	7
219	caatgcttctcgtgatacccagatcatatgaaacagcatgactttttcaagagtgccatgcccgaaggCCTGGCACTCTTGAGAAGTCACGCT	1	caatgcttctcgtgatacccagatcatatgaaacagcatgactttt tgccc tcaagagtgcca g AGTTCTCACGGT a TCGCACTGAAG CCgga	CAATGCTTCTCGTGATACCCAGATCATATGAAACAGCATGACTTTT	0	46	46	TCAAGAGTGCCA	46	58	12		58	58	0	TGCCCGAAGG	58	68	10		68	68	0	CC	68	70	2	TGGCACTCTTGA	70	82	12	GAAGTCACGCT	82	93	11
220	caatgcttctcgtgatacccagatcatatgaaacagcatgactttttcaagagtgccatgcccgaaggCCTGGCACTCTTGAAG	1	caatgcttctcgtgatacccagatcatatgaaacagcatgacttt tgccc ttcaagagtgcca g AAGTTCTCACGGT a G CCgga	CAATGCTTCTCGTGATACCCAGATCATATGAAACAGCATGACTTT	0	45	45	TTCAAGAGTGCCA	45	58	13		58	58	0	TGCCCGAAGG	58	68	10		68	68	0	CC	68	70	2	TGGCACTCTTGAA	70	83	13	G	83	84	1
221	caatgcttctcgtgatacccagatcatatgaaacagcatgactttttcaagagtgccatgcccgaaggGCAAT	1	caatgcttctcgtgatacccagatcatatgaaacagcatgactttttcaagagtgcca g tgccc a ACGgga TA	CAATGCTTCTCGTGATACCCAGATCATATGAAACAGCATGACTTTTTCAAGAGTGCCA	0	58	58	TGC	58	61	3	CC	61	63	2	GAA	63	66	3	GG	66	68	2		68	68	0	GCA	68	71	3	AT	71	73	2
222	caatgcttctcgtgatacccagatcatatgaaacagcatgactttttcaagagtgccatgcccgaaggCCTCCGGGCATGGC	1	caatgcttctcgtgatacccagatcatatgaaacagcatgactttttcaagagt aag gccatgcccg g CGGTACGGGC C CTC	CAATGCTTCTCGTGATACCCAGATCATATGAAACAGCATGACTTTTTCAAGAGT	0	54	54	GCCATGCCCG	54	64	10		64	64	0	AAGG	64	68	4		68	68	0	CCTC	68	72	4	CGGGCATGGC	72	82	10		82	82	0
223	caatgcttctcgtgatacccagatcatatgaaacagcatgactttttcaagagtgccatgcccgaaggGTAA	1	caatgcttctcgtga agatcatatgaaacagcatgac taccc t ATGgg t A aagcccgtaccgtgagaacttt	CAATGCTTCTCGTGA	0	15	15	TAC	15	18	3	CC	18	20	2	AGATCATATGAAACAGCATGACTTTTTCAAGAGTGCCATGCCCGAA	20	66	46	GG	66	68	2		68	68	0	GTA	68	71	3	A	71	72	1
224	caatgcttctcgtgatacccagatcatatgaaacagcatgactttttcaagagtgccatgcccgaaggGTATCACGAGAAGCATTAT	1	c agatcatatgaaacagcatgac aatgcttctcgtgataccc t TTACGAAGAGCACTATGgg t TA aagcccgtaccgtgagaacttt	C	0	1	1	AATGCTTCTCGTGATAC	1	18	17	CC	18	20	2	AGATCATATGAAACAGCATGACTTTTTCAAGAGTGCCATGCCCGAA	20	66	46	GG	66	68	2		68	68	0	GTATCACGAGAAGCATT	68	85	17	AT	85	87	2
225	caatgcttctcgtgatacccagatcatatgaaacagcatgactttttcaagagtgccatgcccgaaggTAG	1	caatgcttctcgtga cagatcatatgaaacagcatgac tacc t ATggaagcccgtaccgtgagaactttt G	CAATGCTTCTCGTGA	0	15	15	TA	15	17	2	CC	17	19	2	CAGATCATATGAAACAGCATGACTTTTTCAAGAGTGCCATGCCCGAA	19	66	47	GG	66	68	2		68	68	0	TA	68	70	2	G	70	71	1
226	caatgcttctcgtgatacccagatcatatgaaacagcatgactttttcaagagtgccatgcccgaaggCG	1	caatgcttctcgtgatacccagatcatatgaaacagcatgactttttcaagagtgccatgcccgaag g C G	CAATGCTTCTCGTGATACCCAGATCATATGAAACAGCATGACTTTTTCAAGAGTGCCATGCCCGAAGG	0	68	68		68	68	0		68	68	0		68	68	0		68	68	0		70	70	0		70	70	0		70	70	0
227	caatgcttctcgtgatacccagatcatatgaaacagcatgactttttcaagagtgccatgcccgaaggCACTCTTGAAGTGCCTTCGGGCAT	1	caatgcttctcgtgatacccagatcatatgaaacagcatgacttt atgc ttcaagagtgcc c AAGTTCTCACggaagc TACGGGCTTCCGTG	CAATGCTTCTCGTGATACCCAGATCATATGAAACAGCATGACTTT	0	45	45	TTCAAGAGTG	45	55	10	CC	55	57	2	ATGCCCGAA	57	66	9	GG	66	68	2		68	68	0	CACTCTTGAA	68	78	10	GTGCCTTCGGGCAT	78	92	14
228	caatgcttctcgtgatacccagatcatatgaaacagcatgactttttcaagagtgccatgcccgaaggCATGA	1	caatgcttctcgtgatacccagatcatatgaaacagcatgactttttcaagagtgc c catgcc g GTACgg a A a	CAATGCTTCTCGTGATACCCAGATCATATGAAACAGCATGACTTTTTCAAGAGTGC	0	56	56	CATG	56	60	4	CC	60	62	2	CGAA	62	66	4	GG	66	68	2		68	68	0	CATG	68	72	4	A	72	73	1
229	caatgcttctcgtgatacccagatcatatgaaacagcatgactttttcaagagtgccatgcccgaaggGGCATTGAT	1	caatgcttctcgtgatacccagatcatatgaaacagcatgactttttcaagagtgcc g atgccc a TACGGg a TAGT g	CAATGCTTCTCGTGATACCCAGATCATATGAAACAGCATGACTTTTTCAAGAGTGCC	0	57	57	ATGCC	57	62	5	C	62	63	1	GAAG	63	67	4	G	67	68	1		68	68	0	GGCAT	68	73	5	TGAT	73	77	4
230	caatgcttctcgtgatacccagatcatatgaaacagcatgactttttcaagagtgccatgcccgaaggGCATGGCACCT	1	caatgcttctcgtgatacccagatcatatgaaacagcatgactttttcaaga g gtgccatgccc a CACGGTACGgga TC	CAATGCTTCTCGTGATACCCAGATCATATGAAACAGCATGACTTTTTCAAGA	0	52	52	GTGCCATGC	52	61	9	CC	61	63	2	GAA	63	66	3	GG	66	68	2		68	68	0	GCATGGCAC	68	77	9	CT	77	79	2
231	caatgcttctcgtgatacccagatcatatgaaacagcatgactttttcaagagtgccatgcccgaaggTCATGCTGTTTCATACAGCATGACCTTCG	1	caatgcttctcgtgatacccagatca tttttcaagagt tatgaaacagcatgac g ATACTTTGTCGTACTggaagcccgtacc GCTTCCAGTACGAC	CAATGCTTCTCGTGATACCCAGATCA	0	26	26	TATGAAACAGCATGA	26	41	15	C	41	42	1	TTTTTCAAGAGTGCCATGCCCGAAG	42	67	25	G	67	68	1		68	68	0	TCATGCTGTTTCATA	68	83	15	CAGCATGACCTTCG	83	97	14
232	caatgcttctcgtgatacccagatcatatgaaacagcatgactttttcaagagtgccatgcccgaaggGCATGGCACTCTTGAAAAAGTCG	1	caatgcttctcgtgatacccagatcatatgaaacagcat g gactttttcaagagtgccatgccc a CTGAAAAAGTTCTCACGGTACGgga G	CAATGCTTCTCGTGATACCCAGATCATATGAAACAGCAT	0	39	39	GACTTTTTCAAGAGTGCCATGC	39	61	22	CC	61	63	2	GAA	63	66	3	GG	66	68	2		68	68	0	GCATGGCACTCTTGAAAAAGTC	68	90	22	G	90	91	1
233	caatgcttctcgtgatacccagatcatatgaaacagcatgactttttcaagagtgccatgcccgaaggCAATGCTTCTCGTGATACCCAGATCATATGATCTGGGTATCG	1	caatgcttctcgtgatacccagatcatatgaaacagcatgactttttcaagagtgcca c tgcc g ACgg a GCTATGGGTCTAGTATACTAGACCCATAGTGCTCTTCGTA a	CAATGCTTCTCGTGATACCCAGATCATATGAAACAGCATGACTTTTTCAAGAGTGCCA	0	58	58	TG	58	60	2	CC	60	62	2	CGAA	62	66	4	GG	66	68	2		68	68	0	CA	68	70	2	ATGCTTCTCGTGATACCCAGATCATATGATCTGGGTATCG	70	110	40
234	caatgcttctcgtgatacccagatcatatgaaacagcatgactttttcaagagtgccatgcccgaaggTCATGCTGTTTCCTAT	1	caatgcttctcgtgatacccagatcatat tttttcaagagt gaaacagcatgac g CTTTGTCGTACTggaagcccgtacc TATC	CAATGCTTCTCGTGATACCCAGATCATAT	0	29	29	GAAACAGCATGA	29	41	12	C	41	42	1	TTTTTCAAGAGTGCCATGCCCGAAG	42	67	25	G	67	68	1		68	68	0	TCATGCTGTTTC	68	80	12	CTAT	80	84	4
235	caatgcttctcgtgatacccagatcatatgaaacagcatgactttttcaagagtgccatgcccgaaggGCATGGCACTCTTGAGAAG	1	caatgcttctcgtgatacccagatcatatgaaacagcatgactttt g tcaagagtgccatgccc a AGTTCTCACGGTACGgga GAAG	CAATGCTTCTCGTGATACCCAGATCATATGAAACAGCATGACTTTT	0	46	46	TCAAGAGTGCCATGC	46	61	15	CC	61	63	2	GAA	63	66	3	GG	66	68	2		68	68	0	GCATGGCACTCTTGA	68	83	15	GAAG	83	87	4
236	caatgcttctcgtgatacccagatcatatgaaacagcatgactttttcaagagtgccatgcccgaaggGGGCATGGCACTCG	1	caatgcttctcgtgatacccagatcatatgaaacagcatgactttttcaa ga gagtgccatgccc a CTCACGGTACGGGgg G	CAATGCTTCTCGTGATACCCAGATCATATGAAACAGCATGACTTTTTCAA	0	50	50	GAGTGCCATGCCC	50	63	13		63	63	0	GAAGG	63	68	5		68	68	0		68	68	0	GGGCATGGCACTC	68	81	13	G	81	82	1
237	caatgcttctcgtgatacccagatcatatgaaacagcatgactttttcaagagtgccatgcccgaaggCCTCTTGAAAAAGGCCTTCGGGCATG	1	caatgcttctcgtgatacccagatcatatgaaacagcatga tgccatg ctttttcaagag c GAAAAAGTTCTC c GTACGGGCTTCCG Cggaagc	CAATGCTTCTCGTGATACCCAGATCATATGAAACAGCATGA	0	41	41	CTTTTTCAAGAG	41	53	12		53	53	0	TGCCATGCCCGAAGG	53	68	15		68	68	0	C	68	69	1	CTCTTGAAAAAG	69	81	12	GCCTTCGGGCATG	81	94	13
238	caatgcttctcgtgatacccagatcatatgaaacagcatgactttttcaagagtgccatgcccgaaggGTATCACGAGAAGCATTGATTCTTCTTTTTCAAGAGTGCCATGCCCGAAGG	1	agatcatatgaaacagcatgac caatgcttctcgtgataccc t GTTACGAAGAGCACTATGgg t GGAAGCCCGTACCGTGAGAACTTTTTCTTCTTA aagcccgtaccgtgagaacttt		0	0	0	CAATGCTTCTCGTGATAC	0	18	18	CC	18	20	2	AGATCATATGAAACAGCATGACTTTTTCAAGAGTGCCATGCCCGAA	20	66	46	GG	66	68	2		68	68	0	GTATCACGAGAAGCATTG	68	86	18	ATTCTTCTTTTTCAAGAGTGCCATGCCCGAAGG	86	119	33
239	caatgcttctcgtgatacccagatcatatgaaacagcatgactttttcaagagtgccatgcccgaaggGTATCACGAGAAGCATT	1	c agatcatatgaaacagcatgac aatgcttctcgtgataccc t TTACGAAGAGCACTATGgg t aagcccgtaccgtgagaacttt	C	0	1	1	AATGCTTCTCGTGATAC	1	18	17	CC	18	20	2	AGATCATATGAAACAGCATGACTTTTTCAAGAGTGCCATGCCCGAA	20	66	46	GG	66	68	2		68	68	0	GTATCACGAGAAGCATT	68	85	17		85	85	0
240	caatgcttctcgtgatacccagatcatatgaaacagcatgactttttcaagagtgccatgcccgaaggGGA	1	caatgcttctcgtgatacccagatcatatgaaacagcatgactttttcaagagtgccatg g ccc a GGg a A g	CAATGCTTCTCGTGATACCCAGATCATATGAAACAGCATGACTTTTTCAAGAGTGCCATG	0	60	60	CC	60	62	2	C	62	63	1	GAAG	63	67	4	G	67	68	1		68	68	0	GG	68	70	2	A	70	71	1
241	caatgcttctcgtgatacccagatcatatgaaacagcatgactttttcaagagtgccatgcccgaaggCCATGCTGTTTCATATGAACT	1	caatgcttctcgtgatacccaga actttttcaagagt tcatatgaaacagcatg g AGTATACTTTGTCGTACCggaagcccgtacc TCA	CAATGCTTCTCGTGATACCCAGA	0	23	23	TCATATGAAACAGCATG	23	40	17		40	40	0	ACTTTTTCAAGAGTGCCATGCCCGAAGG	40	68	28		68	68	0	C	68	69	1	CATGCTGTTTCATATGA	69	86	17	ACT	86	89	3
242	caatgcttctcgtgatacccagatcatatgaaacagcatgactttttcaagagtgccatgcccgaaggCCTTCGGGCATTTCGGGCAT	1	caatgcttctcgtgatacccagatcatatgaaacagcatgactttttcaagagtgcc atgcccgaagg TACGGGCTTCC TACGGGCTT	CAATGCTTCTCGTGATACCCAGATCATATGAAACAGCATGACTTTTTCAAGAGTGCC	0	57	57	ATGCCCGAAGG	57	68	11		68	68	0		68	68	0		68	68	0		68	68	0	CCTTCGGGCAT	68	79	11	TTCGGGCAT	79	88	9
243	caatgcttctcgtgatacccagatcatatgaaacagcatgactttttcaagagtgccatgcccgaaggGCAATGCT	1	caatgcttctcgtgatacccagatcatatgaaacagcatgactttttcaagagtgcca g tgccc a ACGgga TCGTA	CAATGCTTCTCGTGATACCCAGATCATATGAAACAGCATGACTTTTTCAAGAGTGCCA	0	58	58	TGC	58	61	3	CC	61	63	2	GAA	63	66	3	GG	66	68	2		68	68	0	GCA	68	71	3	ATGCT	71	76	5
244	caatgcttctcgtgatacccagatcatatgaaacagcatgactttttcaagagtgccatgcccgaaggCCATGA	1	caatgcttctcgtgatacccagatcatatgaaacagcatgactttttcaagagtgc c catg-cc g GTACCgg a A a	CAATGCTTCTCGTGATACCCAGATCATATGAAACAGCATGACTTTTTCAAGAGTGC	0	56	56	CATG	56	60	4	CC	60	62	2	CGAA	62	66	4	GG	66	68	2	C	68	69	1	CATG	69	73	4	A	73	74	1
245	caatgcttctcgtgatacccagatcatatgaaacagcatgactttttcaagagtgccatgcccgaaggGTCATGCTGTTTCATATGAA	1	caatgcttctcgtgatacccaga tttttcaagagt tcatatgaaacagcatgac g AGTATACTTTGTCGTACTG c A ggaagcccgtac	CAATGCTTCTCGTGATACCCAGA	0	23	23	TCATATGAAACAGCATGAC	23	42	19		42	42	0	TTTTTCAAGAGTGCCATGCCCGAAGG	42	68	26		68	68	0		68	68	0	GTCATGCTGTTTCATATGA	68	87	19	A	87	88	1
246	caatgcttctcgtgatacccagatcatatgaaacagcatgactttttcaagagtgccatgcccgaaggGCATGGCACTCTTGAAAAAGAGTGCCATGCCCGAAGGATGC	1	caatgcttctcgtgatacccagatcatatgaaacagcatga g ctttttcaagagtgccatgccc a GAAAAAGTTCTCACGGTACGgga CGTAGGAAGCCCGTACCGTGA	CAATGCTTCTCGTGATACCCAGATCATATGAAACAGCATGA	0	41	41	CTTTTTCAAGAGTGCCATGC	41	61	20	CC	61	63	2	GAA	63	66	3	GG	66	68	2		68	68	0	GCATGGCACTCTTGAAAAAG	68	88	20	AGTGCCATGCCCGAAGGATGC	88	109	21
247	caatgcttctcgtgatacccagatcatatgaaacagcatgactttttcaagagtgccatgcccgaaggCCACTCTTGAAAAAGTCATGCTGTTTCATAT	1	caatgcttctcgtgatacccagatc atgc atatgaaacagcatgactttttcaagagtg-cc c TATACTTTGTCGTACTGAAAAAGTTCTCACCggaagc	CAATGCTTCTCGTGATACCCAGATC	0	25	25	ATATGAAACAGCATGACTTTTTCAAGAGTG	25	55	30	CC	55	57	2	ATGCCCGAA	57	66	9	GG	66	68	2	C	68	69	1	CACTCTTGAAAAAGTCATGCTGTTTCATAT	69	99	30		99	99	0
248	caatgcttctcgtgatacccagatcatatgaaacagcatgactttttcaagagtgccatgcccgaaggGTATCACGAGAAA	1	caatgc agatcatatgaaacagcatgac ttctcgtgataccc t AAGAGCACTATGgg t A aagcccgtaccgtgagaacttt	CAATGC	0	6	6	TTCTCGTGATAC	6	18	12	CC	18	20	2	AGATCATATGAAACAGCATGACTTTTTCAAGAGTGCCATGCCCGAA	20	66	46	GG	66	68	2		68	68	0	GTATCACGAGAA	68	80	12	A	80	81	1
249	caatgcttctcgtgatacccagatcatatgaaacagcatgactttttcaagagtgccatgcccgaaggGCATGGCACTCTTGGAAAGTCAGCT	1	caatgcttctcgtgatacccagatcatatgaaacagcatgacttttt g caagagtgccatgccc a GTTCTCACGGTACGgga TCGACTGAAAG	CAATGCTTCTCGTGATACCCAGATCATATGAAACAGCATGACTTTTT	0	47	47	CAAGAGTGCCATGC	47	61	14	CC	61	63	2	GAA	63	66	3	GG	66	68	2		68	68	0	GCATGGCACTCTTG	68	82	14	GAAAGTCAGCT	82	93	11
250	caatgcttctcgtgatacccagatcatatgaaacagcatgactttttcaagagtgccatgcccgaaggGCACTCTTGAAAAAGACATGCTGT	1	caatgcttctcgtgatacccagatcatatgaaacagcatga atgc ctttttcaagagtgcc c GAAAAAGTTCTCACGg c TGTCGTACA gaag	CAATGCTTCTCGTGATACCCAGATCATATGAAACAGCATGA	0	41	41	CTTTTTCAAGAGTGC	41	56	15	C	56	57	1	ATGCCCGAAG	57	67	10	G	67	68	1		68	68	0	GCACTCTTGAAAAAG	68	83	15	ACATGCTGT	83	92	9
251	caatgcttctcgtgatacccagatcatatgaaacagcatgactttttcaagagtgccatgcccgaaggTCATGCTGTTTCATAAA	1	caatgcttctcgtgatacccagatca tttttcaagagt tatgaaacagcatgac g ATACTTTGTCGTACTggaagcccgtacc AA	CAATGCTTCTCGTGATACCCAGATCA	0	26	26	TATGAAACAGCATGA	26	41	15	C	41	42	1	TTTTTCAAGAGTGCCATGCCCGAAG	42	67	25	G	67	68	1		68	68	0	TCATGCTGTTTCATA	68	83	15	AA	83	85	2
252	caatgcttctcgtgatacccagatcatatgaaacagcatgactttttcaagagtgccatgcccgaaggCATTGACACTCT	1	ttctcgtgatacccagatcatatgaaacag caatgc c GTTACggaagcccgtaccgtgagaactttttcagta TCTCACA		0	0	0	CAATG	0	5	5	C	5	6	1	TTCTCGTGATACCCAGATCATATGAAACAGCATGACTTTTTCAAGAGTGCCATGCCCGAAG	6	67	61	G	67	68	1		68	68	0	CATTG	68	73	5	ACACTCT	73	80	7
253	caatgcttctcgtgatacccagatcatatgaaacagcatgactttttcaagagtgccatgcccgaaggTCATGCTGTTTCATGACCTTCGGGCAA	1	caatgcttctcgtgatacccagatcat tttttcaagagt atgaaacagcatgac g TACTTTGTCGTACTggaagcccgtacc AACGGGCTTCCAG	CAATGCTTCTCGTGATACCCAGATCAT	0	27	27	ATGAAACAGCATGA	27	41	14	C	41	42	1	TTTTTCAAGAGTGCCATGCCCGAAG	42	67	25	G	67	68	1		68	68	0	TCATGCTGTTTCAT	68	82	14	GACCTTCGGGCAA	82	95	13
254	caatgcttctcgtgatacccagatcatatgaaacagcatgactttttcaagagtgccatgcccgaaggCATTGGA	1	ttctcgtgatacccagatcatatgaaacag caatgc c GTTACggaagcccgtaccgtgagaactttttcagta AG		0	0	0	CAATG	0	5	5	C	5	6	1	TTCTCGTGATACCCAGATCATATGAAACAGCATGACTTTTTCAAGAGTGCCATGCCCGAAG	6	67	61	G	67	68	1		68	68	0	CATTG	68	73	5	GA	73	75	2
255	caatgcttctcgtgatacccagatcatatgaaacagcatgactttttcaagagtgccatgcccgaaggCCC	1	caatgcttctcgtgatacccagatcatatgaaacagcatgactttttcaagagtgccatgcccgaag g C CC	CAATGCTTCTCGTGATACCCAGATCATATGAAACAGCATGACTTTTTCAAGAGTGCCATGCCCGAAGG	0	68	68		68	68	0		68	68	0		68	68	0		68	68	0		71	71	0		71	71	0		71	71	0
256	caatgcttctcgtgatacccagatcatatgaaacagcatgactttttcaagagtgccatgcccgaaggGCATGGCG	1	caatgcttctcgtgatacccagatcatatgaaacagcatgactttttcaagagt g gccatgccc a CGGTACGgga G	CAATGCTTCTCGTGATACCCAGATCATATGAAACAGCATGACTTTTTCAAGAGT	0	54	54	GCCATGC	54	61	7	CC	61	63	2	GAA	63	66	3	GG	66	68	2		68	68	0	GCATGGC	68	75	7	G	75	76	1
257	caatgcttctcgtgatacccagatcatatgaaacagcatgactttttcaagagtgccatgcccgaaggCCTCAATGCTT	1	caatgcttctcgtgatacccagatcatatgaaacagcatgactttttcaagagtgccatgcccga agg TCC TTCGTAAC	CAATGCTTCTCGTGATACCCAGATCATATGAAACAGCATGACTTTTTCAAGAGTGCCATGCCCGA	0	65	65	AGG	65	68	3		68	68	0		68	68	0		68	68	0		68	68	0	CCT	68	71	3	CAATGCTT	71	79	8
258	caatgcttctcgtgatacccagatcatatgaaacagcatgactttttcaagagtgccatgcccgaaggCACTCTTGAAAAGTCATGCTGT	1	caatgcttctcgtgatacccagatcatatgaaacagcatgact atgc ttttcaagagtgcc c AAAAGTTCTCACggaagc TGTCGTACTG	CAATGCTTCTCGTGATACCCAGATCATATGAAACAGCATGACT	0	43	43	TTTTCAAGAGTG	43	55	12	CC	55	57	2	ATGCCCGAA	57	66	9	GG	66	68	2		68	68	0	CACTCTTGAAAA	68	80	12	GTCATGCTGT	80	90	10
259	caatgcttctcgtgatacccagatcatatgaaacagcatgactttttcaagagtgccatgcccgaaggTCATGCTGTTTCATATGATATTATGATCTGGGTATCG	1	caatgcttctcgtgatacccag tttttcaagagt atcatatgaaacagcatgac g TAGTATACTTTGTCGTACTggaagcccgtacc GCTATGGGTCTAGTATTA	CAATGCTTCTCGTGATACCCAG	0	22	22	ATCATATGAAACAGCATGA	22	41	19	C	41	42	1	TTTTTCAAGAGTGCCATGCCCGAAG	42	67	25	G	67	68	1		68	68	0	TCATGCTGTTTCATATGAT	68	87	19	ATTATGATCTGGGTATCG	87	105	18
260	caatgcttctcgtgatacccagatcatatgaaacagcatgactttttcaagagtgccatgcccgaaggCACTCTTGAAAGTCATGCTGTTTCAA	1	caatgcttctcgtgatacccagatcatatgaaacagcatgactt atgc tttcaagagtgcc c AAAGTTCTCACggaagc AACTTTGTCGTACTG	CAATGCTTCTCGTGATACCCAGATCATATGAAACAGCATGACTT	0	44	44	TTTCAAGAGTG	44	55	11	CC	55	57	2	ATGCCCGAA	57	66	9	GG	66	68	2		68	68	0	CACTCTTGAAA	68	79	11	GTCATGCTGTTTCAA	79	94	15
261	caatgcttctcgtgatacccagatcatatgaaacagcatgactttttcaagagtgccatgcccgaaggCCATGGCACTCTTGAAAAAGG	1	caatgcttctcgtgatacccagatcatatgaaacagcatga c ctttttcaagagtgccatg-cc g GAAAAAGTTCTCACGGTACCgg a G a	CAATGCTTCTCGTGATACCCAGATCATATGAAACAGCATGA	0	41	41	CTTTTTCAAGAGTGCCATG	41	60	19	CC	60	62	2	CGAA	62	66	4	GG	66	68	2	C	68	69	1	CATGGCACTCTTGAAAAAG	69	88	19	G	88	89	1
262	caatgcttctcgtgatacccagatcatatgaaacagcatgactttttcaagagtgccatgcccgaaggCCACTCTTGAAAAAGTCATCTTCGGGCATTCGGGCATTCGGGCCTTCGGGCAT	1	caatgcttctcgtgatacccagatcatatgaaacagc atgc atgactttttcaagagtg-cc c TACTGAAAAAGTTCTCACCggaagc TACGGGCTTCCGGGCTTACGGGCTTACGGGCTTC	CAATGCTTCTCGTGATACCCAGATCATATGAAACAGC	0	37	37	ATGACTTTTTCAAGAGTG	37	55	18	CC	55	57	2	ATGCCCGAA	57	66	9	GG	66	68	2	C	68	69	1	CACTCTTGAAAAAGTCAT	69	87	18	CTTCGGGCATTCGGGCATTCGGGCCTTCGGGCAT	87	121	34
263	caatgcttctcgtgatacccagatcatatgaaacagcatgactttttcaagagtgccatgcccgaaggGCATGGCACTCTTGAAAAAGTCA	1	caatgcttctcgtgatacccagatcatatgaaacagca g tgactttttcaagagtgccatgccc a ACTGAAAAAGTTCTCACGGTACGgga	CAATGCTTCTCGTGATACCCAGATCATATGAAACAGCA	0	38	38	TGACTTTTTCAAGAGTGCCATGC	38	61	23	CC	61	63	2	GAA	63	66	3	GG	66	68	2		68	68	0	GCATGGCACTCTTGAAAAAGTCA	68	91	23		91	91	0
264	caatgcttctcgtgatacccagatcatatgaaacagcatgactttttcaagagtgccatgcccgaaggGCATGGCACGC	1	caatgcttctcgtgatacccagatcatatgaaacagcatgactttttcaaga g gtgccatgccc a CACGGTACGgga CG	CAATGCTTCTCGTGATACCCAGATCATATGAAACAGCATGACTTTTTCAAGA	0	52	52	GTGCCATGC	52	61	9	CC	61	63	2	GAA	63	66	3	GG	66	68	2		68	68	0	GCATGGCAC	68	77	9	GC	77	79	2
[truncated: 318 more rows]

## Sheet: lDG17-2_LR-3
<!--ParseRabbit_Task_Header: /home/drewgalls/Desktop/ExtensionPaperRevisions/lDG17/lDG17-2_LR-3_enzyme_S2_mergedD_12_28_24_T_13_10_10_Parsed.xlsx-->
[truncated: 1,092 more rows]

## Sheet: lDG17-10_LR-4
<!--ParseRabbit_Task_Header: /home/drewgalls/Desktop/ExtensionPaperRevisions/lDG17/lDG17-10_AF-LR-4_enzyme_S10_mergedD_12_28_24_T_13_10_23_Parsed.xlsx-->
[truncated: 836 more rows]

[truncated: 9 more sheets: lDG19-4_DG-141, lDG17-16_DG-143, lDG19-6_DG-144, lDG17-20_DG-145, lDG17-6_LR-3, lDG17-6_LR-3prime, lDG19-2_LR-3, lDG19-2_LR-3prime, lDG29-9_txn_temp]
